# Supplementary material
Source: PubMed Central journal article supplement (PMC3430203)
Supplement: MCB.00232-12_zmb999109645so1.pdf [file MCB.00232-12_zmb999109645so1.pdf]

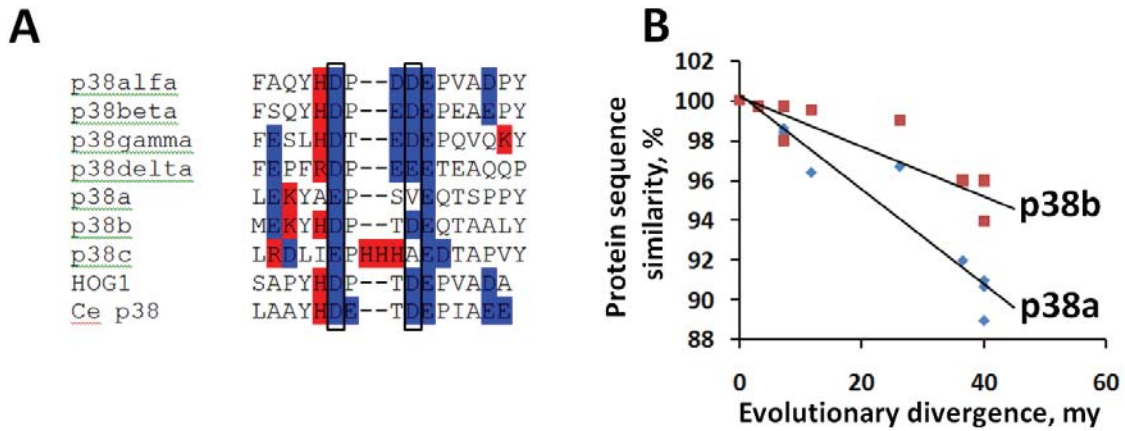

**FIGURE S1. Protein sequence conservation in the *Drosophila* p38 MAP kinases.** (A) CD domain sequences of p38 kinases from various species: human p38 $\alpha$ ,  $\beta$ ,  $\gamma$ , and  $\delta$ , *Drosophila* p38a, b, and c, *S. cerevisiae* HOG1, and *C.elegans* (Ce) p38. Positively charged residues are shown in red, and negatively charged residues – in blue. Asp316 and Asp319 (numbers correspond to *Drosophila* p38b) shown in boxes, are conserved throughout metazoan evolution, but are mutated in *Drosophila* p38a and c. (B) Rates of divergence of the *Drosophila* p38 MAPKs. Protein sequence similarity between the *D. melanogaster* p38 kinases and homologues from other *Drosophila* species is plotted as a function of time since the last ancestor between the respective species. Divergence rates are estimated from the slopes of linear trend lines. Plot points correspond to the following species: *D. simulans* (3.1 my), *D. sechellia* (3.1 my), *D. erecta* (7.2 my), *D. yakuba* (7.2 my), *D. ananassae* (11.7 my), *D. pseudoobscura* (26.2 my), *D. willistoni* (36.5 my), *D. mojavensis* (40 my), *D. virilis* (40 my), and *D. grimshawi* (40 my). p38 protein sequences were obtained from FlyBase, and aligned with the respective *D. melanogaster* sequences.

**TABLE S1. Proteomic quantification of the components of the p38b complex using spectral counting.** Total spectral counts for each component under indicated conditions are shown.

| <b>Replicate</b> | <b>Unstimulated</b> |     |     |     | <b>37°C heat shock</b> |     |     | <b>Oxidative stress</b> |     |
|------------------|---------------------|-----|-----|-----|------------------------|-----|-----|-------------------------|-----|
|                  | 1                   | 2   | 3   | 4   | 1                      | 2   | 3   | 1                       | 2   |
| <b>p38b</b>      | 334                 | 246 | 270 | 241 | 291                    | 361 | 322 | 399                     | 168 |
| <b>MK2</b>       | 86                  | 72  | 94  | 70  | 85                     | 85  | 112 | 93                      | 31  |
| <b>GS</b>        | 24                  | 26  | 57  | 54  | 25                     | 75  | 48  | 67                      | 40  |
| <b>Clbn</b>      | 10                  | 9   | 17  | 18  | 12                     | 22  | 7   | 17                      | 9   |
| <b>GYG</b>       | 4                   | 5   | 9   | 4   | 2                      | 6   | 2   | 2                       | 0   |
| <b>lic</b>       | 5                   | 3   | 0   | 2   | 0                      | 6   | 4   | 4                       | 0   |
| <b>Mekk1</b>     | 0                   | 0   | 0   | 0   | 5                      | 6   | 1   | 0                       | 0   |
| <b>puc</b>       | 0                   | 0   | 1   | 1   | 5                      | 4   | 3   | 4                       | 0   |
| <b>PTP-ER</b>    | 1                   | 2   | 0   | 2   | 0                      | 0   | 0   | 0                       | 0   |
| <b>Mts</b>       | 0                   | 0   | 1   | 1   | 0                      | 0   | 0   | 0                       | 0   |
| <b>S6KII</b>     | 0                   | 0   | 0   | 0   | 0                      | 2   | 0   | 2                       | 0   |

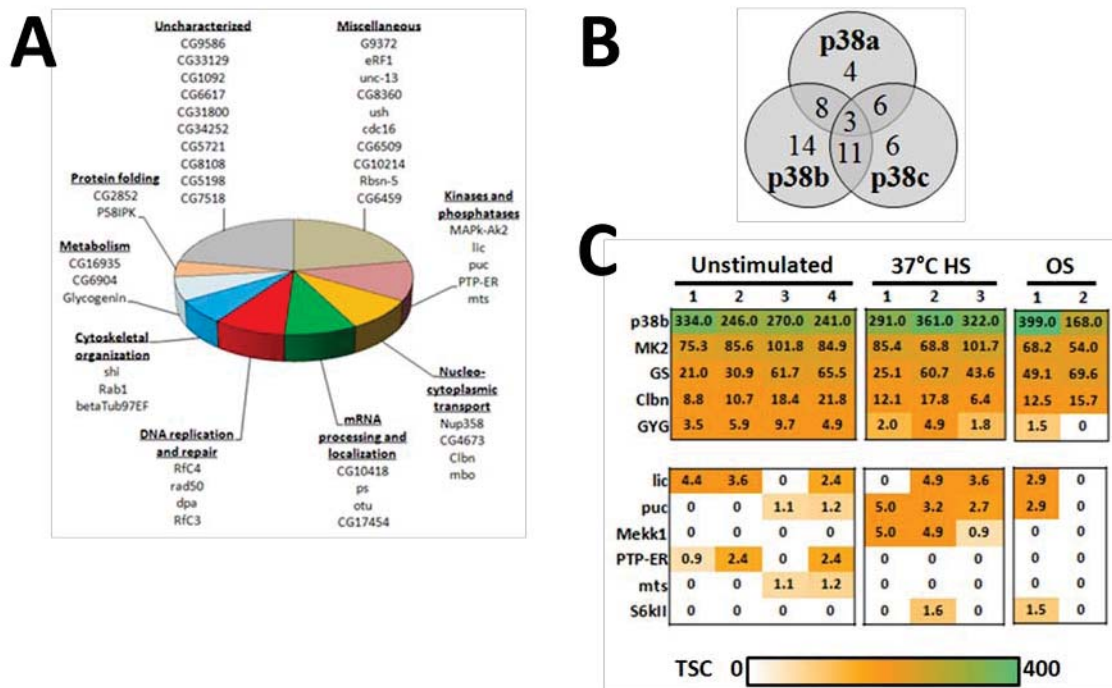

FIGURE S2. *Drosophila* p38 interactome. (A) Pie chart representing the distribution of functional classes of p38 interacting proteins. Sectors are color-coded to match the colors in the table in Figure 4. (B) Venn diagram illustrating the numbers of unique and shared p38 interacting proteins. (C) Total spectral counts (TSCs) of peptides derived from p38b-binding proteins in samples from unstimulated, heat shocked (HS), and oxidative stress-treated (OS) S2 cells. Numbers above the table represent individual replicates. TSC values are normalized to the respective bait TSC in each sample, and presented as a heat map in the range from 0 to 400.

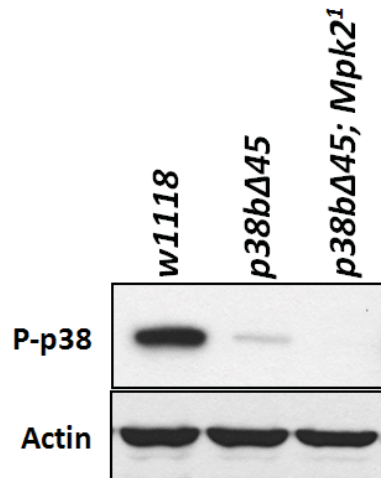

FIGURE S3. **p38 MAPK is active in early *Drosophila* embryos.** The expression of doubly phosphorylated (active) p38 was detected by Western blotting of total lysates from the wild-type *w1118* embryos. The P-p38 band represents both p38a and p38b isoforms. P-p38b is the predominant species as the signal is greatly reduced in *p38bΔ45* (p38b null) embryos, and completely absent in double p38a (*Mpk2<sup>1</sup>*) and p38b mutants.

TABLE S2. **Experimentally observed phosphorylation sites in p38b-interacting proteins, and computationally predicted p38 phosphorylation sites.** Experimental phosphosites were extracted from two datasets, described in J Proteome Res. (2008), 7(4):1675-82 and Nat Biotechnol. (2008), 26(12):1339-40. Computational predictions were made using Scansite program (Nucleic Acids Res. (2003), 31(13):3635-41). Phosphosites found in both experimental datasets are shown in bold. Observed phosphosites matching the predicted p38 sites are underlined.

| <b>p38b interacting protein</b> | <b>Phosphosites from <i>w<sup>1118</sup></i> embryos</b>                                                                                          | <b>Phosphosites from Kc cells</b>                                                                                                    | <b>Predicted p38 phosphorylation sites</b>                   |
|---------------------------------|---------------------------------------------------------------------------------------------------------------------------------------------------|--------------------------------------------------------------------------------------------------------------------------------------|--------------------------------------------------------------|
| GS                              | <b>S6, S10</b> , S636, <b>S640</b> , S647, <b>S651</b> , <u>S655</u> , T657, S659, T662, T663, S667, <b>S671</b> , <b>S676</b> , T681             | <b>S6, S10</b> , T403, <b>S640</b> , <b>S651</b> , <u>S655</u> , <b>S671</b> , <b>S676</b>                                           | <u>S655</u>                                                  |
| MK2                             | -                                                                                                                                                 | T115, T158, <u>T178</u> , <u>T290</u> , T294, T340                                                                                   | <u>T178</u> , <u>T290</u>                                    |
| Clbn                            | -                                                                                                                                                 | -                                                                                                                                    | -                                                            |
| Glycogenin                      | <b>S206</b> , S374, T379                                                                                                                          | <b>S206</b>                                                                                                                          | -                                                            |
| lic                             | <b>T8, S200</b>                                                                                                                                   | <b>T8, S200</b>                                                                                                                      | -                                                            |
| CG6509                          | S664, S985, S988, <b>S991</b> , S994, S1206, S1208, <b>S1278</b> , <u>S1390</u> , S1397, T1399                                                    | T89, S301, T719, T733, S881, S886, S958, <b>S991</b> , T1054, S1172, S1188, S1256, <b>S1278</b> , <u>S1390</u> , S1395, S1411, T1671 | T668, S1077, <u>S1390</u>                                    |
| CG5198                          | T22, <b>S25</b> , <b>S30</b> , <b>S41</b>                                                                                                         | S17, <b>S25</b> , <b>S30</b> , <b>S41</b> , S116, S117, T164                                                                         | -                                                            |
| puc                             | -                                                                                                                                                 | T186, S413                                                                                                                           | S135, T280, T360, S441                                       |
| RfC3                            | -                                                                                                                                                 | -                                                                                                                                    | -                                                            |
| CG5721                          | T9                                                                                                                                                | T457                                                                                                                                 | -                                                            |
| cdc16                           | <b>S336</b> , T343                                                                                                                                | S248, <u>T287</u> , <b>S336</b>                                                                                                      | <u>T287</u> , S607                                           |
| eRF1                            | S341                                                                                                                                              | S70, T340                                                                                                                            | -                                                            |
| CG4673                          | T114, <b>S115</b> , T117, S134, <b>S138</b>                                                                                                       | S111, <b>S115</b> , <b>S138</b>                                                                                                      | -                                                            |
| PTP-ER                          | S128, S130, S166, S170, <b>S172</b> , <b>S176</b> , T178, T188, <b>S258</b> , T516, T521, T522, <b>S728</b>                                       | <b>S172</b> , <b>S176</b> , <b>S258</b> , S381, <b>S728</b> , <u>S788</u>                                                            | T21, S111, T307, <u>S788</u>                                 |
| ush                             | S21, S24, S109, S111, <u>T112</u> , <u>S116</u> , S118, <u>S119</u> , S243, T254, <b>S548</b> , <b>S1013</b> , S1015, <b>S1017</b> , S1154, S1156 | <u>T131</u> , S134, <b>S548</b> , S556, S633, <b>S1013</b> , <b>S1017</b> , S1069                                                    | <u>T112</u> , <u>S116</u> , <u>S119</u> , <u>T131</u> , S607 |
| unc-13                          | -                                                                                                                                                 | S2136, S2734                                                                                                                         | S219, S544, T697                                             |

|         |                                                                                                                                                                          |                                                                                                                  |             |
|---------|--------------------------------------------------------------------------------------------------------------------------------------------------------------------------|------------------------------------------------------------------------------------------------------------------|-------------|
| mts     | -                                                                                                                                                                        | -                                                                                                                | -           |
| CG10418 | -                                                                                                                                                                        | -                                                                                                                | -           |
| CG8108  | T121, S122, S123, S124, S132, S133, S140, S141, S341, S370, S374, <b>S381, S603, S605, S608</b> , T769, S805, <b>S851</b> , T854, <b><u>T855</u></b> , T857, <b>T872</b> | S61, S181, S305, <b>S381</b> , S400, <b>S603, S605, S608</b> , T829, S843, <b>S851, <u>T855</u>, T872</b> , S899 | <u>T855</u> |
| otu     | -                                                                                                                                                                        | -                                                                                                                | S546, T765  |

**TABLE S3. List of the p38 interacting proteins from the DPiM database that were also isolated in this study.** Color codes are as follows: Green, common specific interactors; Red, interactors present only in control purifications in this study; Blue, interactors present both in control and bait purifications in this study; Grey, proteins that can not be reliably distinguished from the respective baits due to high sequence identity.

| p38a    | p38b          | p38c        |
|---------|---------------|-------------|
| CG8602  | Atg18         | Atx2        |
| lpk1    | CG8602        | bocksbeutel |
| 128up   | CkII $\alpha$ | CG4278      |
| Arc-p34 | HLHm3         | isoQC       |
| CG10306 | h             | Jafrac2     |
| CG3817  | lpk1          | mRpS24      |
| Imp     | Atg12         | Ote         |
| isoQC   | CG6094        | Pdi         |
| LRP1    | eIF-5A        | Saf-B       |
| p16-ARC | MAPk-Ak2      | SmD3        |
| Rpb8    | Mpk2          | Tm1         |
| p38b    | mRpL10        | U4-U6-60K   |
|         | mRpL19        |             |
|         | mRpL43        |             |
|         | mRpL44        |             |
|         | mRpL4         |             |
|         | mRpL51        |             |
|         | mts           |             |
|         | Psi           |             |
|         | Rbp1-like     |             |
|         | RpS21         |             |
|         | Saf-B         |             |
|         | SC35          |             |
|         | SmG           |             |
|         | Vha55         |             |
|         | wdb           |             |
|         | Zn72D         |             |
|         | PCID2         |             |
|         | porin         |             |
|         | puc           |             |
|         | Rab10         |             |
|         | skpA          |             |
|         | Snr1          |             |

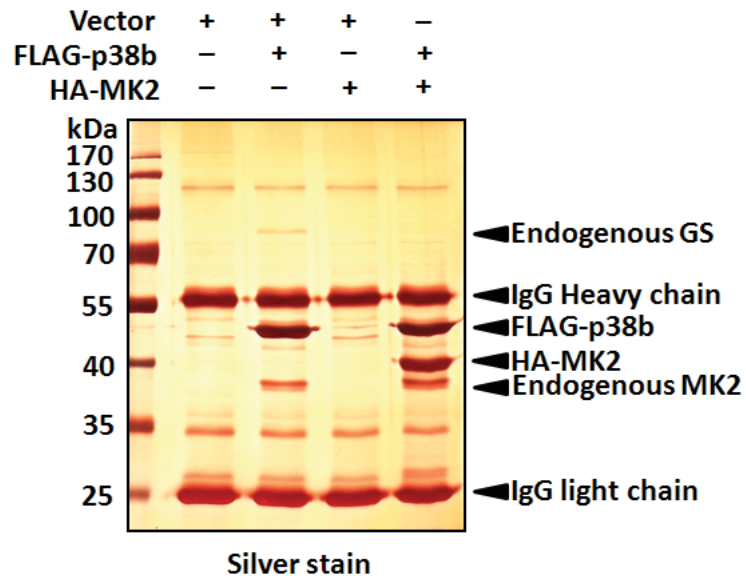

FIGURE S4. **MK2 competes with GS for binding to p38b, suggesting two mutually exclusive complexes.** S2 cells were transfected with indicated constructs and used for co-immunoprecipitation with FLAG-p38 as bait. Immunoprecipitated samples were run on an SDS-PAGE gel and visualized by silver staining. Note the disappearance of the endogenous GS band in the presence of over-expressed MK2.
