# Supplementary material
Source: PubMed Central journal article supplement (PMC3430203)
Supplement: MCB.00232-12_zmb999109645so2.pdf [file MCB.00232-12_zmb999109645so2.pdf]

**DATASET S1.** Proteins identified in the control and p38 bait MS experiments. Individual samples are labeled as HS, heat shock; OS, oxidative stress. Numbers after bait names denote replicate number. The dataset is sorted by Mascot score, followed by sorting the identified proteins using ProHits.

| Bait Gene Name | Bait Gene ID | Hit Gene Name | Hit Gene ID | Hit Protein ID | Mascot Score |
|----------------|--------------|---------------|-------------|----------------|--------------|
| Vector-US-1    | Vector       | zip           | 38001       | 24762818       | 1426         |
| Vector-US-2    | Vector       | zip           | 38001       | 62471820       | 1149         |
| Vector-US-3    | Vector       | zip           | 38001       | 62471820       | 869          |
| Vector-US-4    | Vector       | zip           | 38001       | 24762818       | 702          |
| Vector-HS-1    | Vector       | zip           | 38001       | 24762818       | 851          |
| Vector-OS-1    | Vector       | zip           | 38001       | 24762818       | 1116         |
| Vector-OS-2    | Vector       | zip           | 38001       | 24762816       | 71           |
| Vector-OS-3    | Vector       | zip           | 38001       | 24762818       | 368          |
| Mef2-US-1      | Mef2         | zip           | 38001       | 24762816       | 153          |
| p38a-1         | p38a         | zip           | 38001       | 62471820       | 737          |
| p38a-2         | p38a         | zip           | 38001       | 62471820       | 590          |
| p38a-3         | p38a         | zip           | 38001       | 24762816       | 453          |
| p38a-4         | p38a         | zip           | 38001       | 62471805       | 759          |
| p38b-1         | p38b         | zip           | 38001       | 62471805       | 68           |
| p38b-2         | p38b         | zip           | 38001       | 24762818       | 234          |
| p38b-3         | p38b         | zip           | 38001       | 62471820       | 313          |
| p38b-4         | p38b         | zip           | 38001       | 24762818       | 322          |
| p38c-1         | p38c         | zip           | 38001       | 24762818       | 584          |
| p38c-2         | p38c         | zip           | 38001       | 62471820       | 755          |
| p38c-3         | p38c         | zip           | 38001       | 62471820       | 923          |
| p38c-4         | p38c         | zip           | 38001       | 24762818       | 1151         |
| Vector-US-1    | Vector       | Hsp83         | 38389       | 17647529       | 1308         |
| Vector-US-2    | Vector       | Hsp83         | 38389       | 17647529       | 1215         |
| Vector-US-3    | Vector       | Hsp83         | 38389       | 17647529       | 1438         |
| Vector-US-4    | Vector       | Hsp83         | 38389       | 17647529       | 957          |
| Vector-HS-1    | Vector       | Hsp83         | 38389       | 17647529       | 939          |
| Vector-OS-1    | Vector       | Hsp83         | 38389       | 17647529       | 1022         |
| Vector-OS-2    | Vector       | Hsp83         | 38389       | 17647529       | 174          |
| Vector-OS-3    | Vector       | Hsp83         | 38389       | 17647529       | 226          |
| Mef2-US-1      | Mef2         | Hsp83         | 38389       | 17647529       | 622          |
| Mef2-US-2      | Mef2         | Hsp83         | 38389       | 17647529       | 524          |
| p38a-1         | p38a         | Hsp83         | 38389       | 17647529       | 764          |
| p38a-2         | p38a         | Hsp83         | 38389       | 17647529       | 1211         |
| p38a-3         | p38a         | Hsp83         | 38389       | 17647529       | 1386         |
| p38a-4         | p38a         | Hsp83         | 38389       | 17647529       | 1100         |
| p38b-1         | p38b         | Hsp83         | 38389       | 17647529       | 926          |
| p38b-2         | p38b         | Hsp83         | 38389       | 17647529       | 729          |
| p38b-3         | p38b         | Hsp83         | 38389       | 17647529       | 702          |
| p38b-4         | p38b         | Hsp83         | 38389       | 17647529       | 765          |
| p38c-1         | p38c         | Hsp83         | 38389       | 17647529       | 1212         |
| p38c-2         | p38c         | Hsp83         | 38389       | 17647529       | 1408         |

|             |        |         |         |          |      |
|-------------|--------|---------|---------|----------|------|
| p38c-3      | p38c   | Hsp83   | 38389   | 17647529 | 1436 |
| p38c-4      | p38c   | Hsp83   | 38389   | 17647529 | 1619 |
| Vector-US-1 | Vector | eIF-4B  | 3355041 | 62862344 | 1275 |
| Vector-US-2 | Vector | eIF-4B  | 3355041 | 62862344 | 986  |
| Vector-US-3 | Vector | eIF-4B  | 3355041 | 62862344 | 1219 |
| Vector-US-4 | Vector | eIF-4B  | 3355041 | 62862344 | 1001 |
| Vector-HS-1 | Vector | eIF-4B  | 3355041 | 62862344 | 1380 |
| Vector-OS-1 | Vector | eIF-4B  | 3355041 | 62862344 | 1398 |
| Vector-OS-2 | Vector | eIF-4B  | 3355041 | 62862346 | 244  |
| Vector-OS-3 | Vector | eIF-4B  | 3355041 | 62862346 | 259  |
| Mef2-US-1   | Mef2   | eIF-4B  | 3355041 | 62862344 | 824  |
| Mef2-US-2   | Mef2   | eIF-4B  | 3355041 | 62862344 | 963  |
| p38a-1      | p38a   | eIF-4B  | 3355041 | 62862346 | 588  |
| p38a-2      | p38a   | eIF-4B  | 3355041 | 62862344 | 797  |
| p38a-3      | p38a   | eIF-4B  | 3355041 | 62862344 | 1042 |
| p38a-4      | p38a   | eIF-4B  | 3355041 | 62862344 | 1032 |
| p38b-1      | p38b   | eIF-4B  | 3355041 | 62862344 | 36   |
| p38c-1      | p38c   | eIF-4B  | 3355041 | 62862344 | 1113 |
| p38c-2      | p38c   | eIF-4B  | 3355041 | 62862346 | 1012 |
| p38c-3      | p38c   | eIF-4B  | 3355041 | 62862344 | 1210 |
| p38c-4      | p38c   | eIF-4B  | 3355041 | 62862344 | 1204 |
| Vector-US-1 | Vector | Hsc70-4 | 41840   | 17737967 | 961  |
| Vector-US-2 | Vector | Hsc70-4 | 41840   | 17737967 | 856  |
| Vector-US-3 | Vector | Hsc70-4 | 41840   | 17737967 | 1087 |
| Vector-US-4 | Vector | Hsc70-4 | 41840   | 17737967 | 850  |
| Vector-HS-1 | Vector | Hsc70-4 | 41840   | 17737967 | 969  |
| Vector-OS-1 | Vector | Hsc70-4 | 41840   | 17737967 | 1140 |
| Vector-OS-2 | Vector | Hsc70-4 | 41840   | 17737967 | 192  |
| Vector-OS-3 | Vector | Hsc70-4 | 41840   | 17737967 | 304  |
| Mef2-US-1   | Mef2   | Hsc70-4 | 41840   | 17737967 | 1045 |
| Mef2-US-2   | Mef2   | Hsc70-4 | 41840   | 17737967 | 1336 |
| p38a-1      | p38a   | Hsc70-4 | 41840   | 17737967 | 852  |
| p38a-2      | p38a   | Hsc70-4 | 41840   | 17737967 | 1221 |
| p38a-3      | p38a   | Hsc70-4 | 41840   | 17737967 | 1114 |
| p38a-4      | p38a   | Hsc70-4 | 41840   | 17737967 | 990  |
| p38b-1      | p38b   | Hsc70-4 | 41840   | 17737967 | 726  |
| p38b-2      | p38b   | Hsc70-4 | 41840   | 17737967 | 711  |
| p38b-3      | p38b   | Hsc70-4 | 41840   | 17737967 | 1058 |
| p38b-4      | p38b   | Hsc70-4 | 41840   | 17737967 | 816  |
| p38c-1      | p38c   | Hsc70-4 | 41840   | 17737967 | 1350 |
| p38c-2      | p38c   | Hsc70-4 | 41840   | 17737967 | 1180 |
| p38c-3      | p38c   | Hsc70-4 | 41840   | 17737967 | 1010 |
| p38c-4      | p38c   | Hsc70-4 | 41840   | 17737967 | 1103 |
| Vector-US-1 | Vector | dre4    | 38248   | 45551505 | 946  |
| Vector-US-2 | Vector | dre4    | 38248   | 45551505 | 805  |
| Vector-US-3 | Vector | dre4    | 38248   | 45551505 | 934  |
| Vector-US-4 | Vector | dre4    | 38248   | 45551505 | 797  |

|             |        |        |       |          |      |
|-------------|--------|--------|-------|----------|------|
| Vector-HS-1 | Vector | dre4   | 38248 | 45551505 | 314  |
| Vector-OS-1 | Vector | dre4   | 38248 | 45551505 | 677  |
| Vector-OS-3 | Vector | dre4   | 38248 | 45549019 | 73   |
| Mef2-US-1   | Mef2   | dre4   | 38248 | 45551505 | 182  |
| Mef2-US-2   | Mef2   | dre4   | 38248 | 45551505 | 186  |
| p38a-1      | p38a   | dre4   | 38248 | 45551505 | 675  |
| p38a-2      | p38a   | dre4   | 38248 | 45551505 | 644  |
| p38a-3      | p38a   | dre4   | 38248 | 45551505 | 634  |
| p38a-4      | p38a   | dre4   | 38248 | 45549019 | 366  |
| p38c-1      | p38c   | dre4   | 38248 | 45549019 | 431  |
| p38c-2      | p38c   | dre4   | 38248 | 45551505 | 385  |
| p38c-3      | p38c   | dre4   | 38248 | 45551505 | 159  |
| p38c-4      | p38c   | dre4   | 38248 | 45551505 | 432  |
| Vector-US-1 | Vector | Hsp60  | 32045 | 24641191 | 900  |
| Vector-US-2 | Vector | Hsp60  | 32045 | 24641191 | 1166 |
| Vector-US-3 | Vector | Hsp60  | 32045 | 24641191 | 756  |
| Vector-US-4 | Vector | Hsp60  | 32045 | 24641191 | 996  |
| Vector-HS-1 | Vector | Hsp60  | 32045 | 24641191 | 109  |
| Vector-OS-1 | Vector | Hsp60  | 32045 | 24641191 | 280  |
| Vector-OS-2 | Vector | Hsp60  | 32045 | 24641191 | 134  |
| Vector-OS-3 | Vector | Hsp60  | 32045 | 24641191 | 97   |
| Mef2-US-1   | Mef2   | Hsp60  | 32045 | 24641191 | 629  |
| Mef2-US-2   | Mef2   | Hsp60  | 32045 | 24641191 | 155  |
| p38a-1      | p38a   | Hsp60  | 32045 | 24641191 | 863  |
| p38a-2      | p38a   | Hsp60  | 32045 | 24641191 | 995  |
| p38a-3      | p38a   | Hsp60  | 32045 | 24641191 | 930  |
| p38a-4      | p38a   | Hsp60  | 32045 | 24641191 | 704  |
| p38b-1      | p38b   | Hsp60  | 32045 | 24641191 | 748  |
| p38b-2      | p38b   | Hsp60  | 32045 | 24641191 | 632  |
| p38b-3      | p38b   | Hsp60  | 32045 | 24641191 | 736  |
| p38b-4      | p38b   | Hsp60  | 32045 | 24641191 | 573  |
| p38c-1      | p38c   | Hsp60  | 32045 | 24641191 | 940  |
| p38c-2      | p38c   | Hsp60  | 32045 | 24641191 | 1165 |
| p38c-3      | p38c   | Hsp60  | 32045 | 24641191 | 926  |
| p38c-4      | p38c   | Hsp60  | 32045 | 24641191 | 1176 |
| Vector-US-1 | Vector | CG3523 | 33524 | 19920632 | 898  |
| Vector-US-2 | Vector | CG3523 | 33524 | 19920632 | 891  |
| Vector-US-3 | Vector | CG3523 | 33524 | 19920632 | 1187 |
| Vector-US-4 | Vector | CG3523 | 33524 | 19920632 | 1199 |
| Vector-HS-1 | Vector | CG3523 | 33524 | 19920632 | 367  |
| Vector-OS-1 | Vector | CG3523 | 33524 | 19920632 | 442  |
| Vector-OS-2 | Vector | CG3523 | 33524 | 19920632 | 83   |
| Vector-OS-3 | Vector | CG3523 | 33524 | 19920632 | 91   |
| Mef2-US-1   | Mef2   | CG3523 | 33524 | 19920632 | 113  |
| Mef2-US-2   | Mef2   | CG3523 | 33524 | 19920632 | 52   |
| p38a-1      | p38a   | CG3523 | 33524 | 19920632 | 358  |
| p38a-2      | p38a   | CG3523 | 33524 | 19920632 | 381  |

|             |        |        |       |          |      |
|-------------|--------|--------|-------|----------|------|
| p38a-3      | p38a   | CG3523 | 33524 | 19920632 | 798  |
| p38a-4      | p38a   | CG3523 | 33524 | 19920632 | 863  |
| p38b-1      | p38b   | CG3523 | 33524 | 19920632 | 113  |
| p38b-2      | p38b   | CG3523 | 33524 | 19920632 | 237  |
| p38b-3      | p38b   | CG3523 | 33524 | 19920632 | 414  |
| p38b-4      | p38b   | CG3523 | 33524 | 19920632 | 319  |
| p38c-1      | p38c   | CG3523 | 33524 | 19920632 | 945  |
| p38c-2      | p38c   | CG3523 | 33524 | 19920632 | 1141 |
| p38c-3      | p38c   | CG3523 | 33524 | 19920632 | 968  |
| p38c-4      | p38c   | CG3523 | 33524 | 19920632 | 841  |
| Vector-US-1 | Vector | Df31   | 35418 | 17737433 | 772  |
| Vector-US-2 | Vector | Df31   | 35418 | 17737433 | 161  |
| Vector-US-3 | Vector | Df31   | 35418 | 17737433 | 320  |
| Vector-US-4 | Vector | Df31   | 35418 | 17737433 | 217  |
| Vector-OS-1 | Vector | Df31   | 35418 | 17737433 | 187  |
| Mef2-US-2   | Mef2   | Df31   | 35418 | 17737433 | 53   |
| p38a-2      | p38a   | Df31   | 35418 | 17737433 | 210  |
| p38a-3      | p38a   | Df31   | 35418 | 17737433 | 77   |
| p38b-4      | p38b   | Df31   | 35418 | 17737433 | 124  |
| p38c-1      | p38c   | Df31   | 35418 | 17737433 | 305  |
| p38c-2      | p38c   | Df31   | 35418 | 17737433 | 190  |
| p38c-3      | p38c   | Df31   | 35418 | 17737433 | 274  |
| p38c-4      | p38c   | Df31   | 35418 | 17737433 | 123  |
| Vector-US-1 | Vector | cher   | 42066 | 62484180 | 710  |
| Vector-US-2 | Vector | cher   | 42066 | 62484180 | 589  |
| Vector-US-3 | Vector | cher   | 42066 | 62484180 | 462  |
| Vector-US-4 | Vector | cher   | 42066 | 62484180 | 115  |
| Vector-OS-3 | Vector | cher   | 42066 | 62484180 | 51   |
| p38a-1      | p38a   | cher   | 42066 | 62484180 | 158  |
| p38a-2      | p38a   | cher   | 42066 | 62484180 | 372  |
| p38a-3      | p38a   | cher   | 42066 | 62484180 | 396  |
| p38a-4      | p38a   | cher   | 42066 | 62484180 | 81   |
| p38b-1      | p38b   | cher   | 42066 | 62484180 | 31   |
| p38c-1      | p38c   | cher   | 42066 | 62484180 | 243  |
| p38c-2      | p38c   | cher   | 42066 | 62484180 | 68   |
| p38c-3      | p38c   | cher   | 42066 | 62484180 | 113  |
| p38c-4      | p38c   | cher   | 42066 | 62484180 | 404  |
| Vector-US-1 | Vector | Khc-73 | 36718 | 28573815 | 702  |
| Vector-US-2 | Vector | Khc-73 | 36718 | 28573815 | 1230 |
| Vector-US-3 | Vector | Khc-73 | 36718 | 28573815 | 1520 |
| Vector-US-4 | Vector | Khc-73 | 36718 | 28573815 | 1144 |
| Vector-HS-1 | Vector | Khc-73 | 36718 | 28573815 | 638  |
| Vector-OS-1 | Vector | Khc-73 | 36718 | 28573815 | 1304 |
| Vector-OS-2 | Vector | Khc-73 | 36718 | 28573815 | 210  |
| Vector-OS-3 | Vector | Khc-73 | 36718 | 28573815 | 193  |
| Mef2-US-1   | Mef2   | Khc-73 | 36718 | 28573815 | 241  |
| Mef2-US-2   | Mef2   | Khc-73 | 36718 | 28573815 | 47   |

|             |        |         |       |          |      |
|-------------|--------|---------|-------|----------|------|
| p38a-1      | p38a   | Khc-73  | 36718 | 28573815 | 642  |
| p38a-2      | p38a   | Khc-73  | 36718 | 28573815 | 1127 |
| p38a-3      | p38a   | Khc-73  | 36718 | 28573815 | 643  |
| p38a-4      | p38a   | Khc-73  | 36718 | 28573815 | 474  |
| p38c-1      | p38c   | Khc-73  | 36718 | 28573815 | 635  |
| p38c-2      | p38c   | Khc-73  | 36718 | 28573815 | 747  |
| p38c-3      | p38c   | Khc-73  | 36718 | 28573815 | 468  |
| p38c-4      | p38c   | Khc-73  | 36718 | 28573815 | 585  |
| Vector-US-1 | Vector | Hsc70-3 | 32133 | 24641402 | 698  |
| Vector-US-2 | Vector | Hsc70-3 | 32133 | 24641402 | 1024 |
| Vector-US-3 | Vector | Hsc70-3 | 32133 | 24641402 | 901  |
| Vector-US-4 | Vector | Hsc70-3 | 32133 | 24641402 | 772  |
| Vector-HS-1 | Vector | Hsc70-3 | 32133 | 24641402 | 1034 |
| Vector-OS-1 | Vector | Hsc70-3 | 32133 | 24641402 | 1520 |
| Vector-OS-2 | Vector | Hsc70-3 | 32133 | 24641402 | 208  |
| Vector-OS-3 | Vector | Hsc70-3 | 32133 | 24641402 | 219  |
| Mef2-US-1   | Mef2   | Hsc70-3 | 32133 | 24641402 | 1087 |
| Mef2-US-2   | Mef2   | Hsc70-3 | 32133 | 24641402 | 1009 |
| p38a-1      | p38a   | Hsc70-3 | 32133 | 24641402 | 719  |
| p38a-2      | p38a   | Hsc70-3 | 32133 | 24641402 | 890  |
| p38a-3      | p38a   | Hsc70-3 | 32133 | 24641402 | 705  |
| p38a-4      | p38a   | Hsc70-3 | 32133 | 24641402 | 779  |
| p38b-2      | p38b   | Hsc70-3 | 32133 | 24641402 | 325  |
| p38b-3      | p38b   | Hsc70-3 | 32133 | 24641402 | 419  |
| p38b-4      | p38b   | Hsc70-3 | 32133 | 24641402 | 323  |
| p38c-1      | p38c   | Hsc70-3 | 32133 | 24641402 | 1138 |
| p38c-2      | p38c   | Hsc70-3 | 32133 | 24641402 | 971  |
| p38c-3      | p38c   | Hsc70-3 | 32133 | 24641402 | 793  |
| p38c-4      | p38c   | Hsc70-3 | 32133 | 24641402 | 1051 |
| Vector-US-1 | Vector | TER94   | 36040 | 17137560 | 673  |
| Vector-US-2 | Vector | TER94   | 36040 | 17137560 | 913  |
| Vector-US-3 | Vector | TER94   | 36040 | 17137560 | 962  |
| Vector-US-4 | Vector | TER94   | 36040 | 17137560 | 943  |
| Vector-HS-1 | Vector | TER94   | 36040 | 17137560 | 540  |
| Vector-OS-1 | Vector | TER94   | 36040 | 17137560 | 803  |
| Vector-OS-2 | Vector | TER94   | 36040 | 17137560 | 227  |
| Vector-OS-3 | Vector | TER94   | 36040 | 17137560 | 205  |
| Mef2-US-1   | Mef2   | TER94   | 36040 | 17137560 | 550  |
| Mef2-US-2   | Mef2   | TER94   | 36040 | 17137560 | 202  |
| p38a-1      | p38a   | TER94   | 36040 | 17137560 | 622  |
| p38a-2      | p38a   | TER94   | 36040 | 17137560 | 845  |
| p38a-3      | p38a   | TER94   | 36040 | 17137560 | 749  |
| p38a-4      | p38a   | TER94   | 36040 | 17137560 | 642  |
| p38b-1      | p38b   | TER94   | 36040 | 17137560 | 249  |
| p38b-2      | p38b   | TER94   | 36040 | 17137560 | 441  |
| p38b-3      | p38b   | TER94   | 36040 | 17137560 | 400  |
| p38b-4      | p38b   | TER94   | 36040 | 17137560 | 487  |

|             |        |        |       |          |      |
|-------------|--------|--------|-------|----------|------|
| p38c-1      | p38c   | TER94  | 36040 | 17137560 | 876  |
| p38c-2      | p38c   | TER94  | 36040 | 17137560 | 1002 |
| p38c-3      | p38c   | TER94  | 36040 | 17137560 | 804  |
| p38c-4      | p38c   | TER94  | 36040 | 17137560 | 777  |
| Vector-US-1 | Vector | Khc    | 36810 | 17136240 | 535  |
| Vector-US-2 | Vector | Khc    | 36810 | 17136240 | 249  |
| Vector-US-3 | Vector | Khc    | 36810 | 17136240 | 287  |
| Vector-US-4 | Vector | Khc    | 36810 | 17136240 | 357  |
| Vector-OS-1 | Vector | Khc    | 36810 | 17136240 | 377  |
| Vector-OS-2 | Vector | Khc    | 36810 | 17136240 | 99   |
| Vector-OS-3 | Vector | Khc    | 36810 | 17136240 | 111  |
| p38a-2      | p38a   | Khc    | 36810 | 17136240 | 91   |
| p38a-3      | p38a   | Khc    | 36810 | 17136240 | 156  |
| p38a-4      | p38a   | Khc    | 36810 | 17136240 | 370  |
| p38b-1      | p38b   | Khc    | 36810 | 17136240 | 94   |
| p38b-3      | p38b   | Khc    | 36810 | 17136240 | 61   |
| p38c-2      | p38c   | Khc    | 36810 | 17136240 | 414  |
| p38c-3      | p38c   | Khc    | 36810 | 17136240 | 392  |
| p38c-4      | p38c   | Khc    | 36810 | 17136240 | 315  |
| Vector-US-1 | Vector | Eps-15 | 37961 | 22026957 | 528  |
| Vector-US-2 | Vector | Eps-15 | 37961 | 22026957 | 815  |
| Vector-US-3 | Vector | Eps-15 | 37961 | 24762734 | 689  |
| Vector-US-4 | Vector | Eps-15 | 37961 | 24762734 | 856  |
| Vector-HS-1 | Vector | Eps-15 | 37961 | 22026957 | 1031 |
| Vector-OS-1 | Vector | Eps-15 | 37961 | 22026957 | 711  |
| Vector-OS-2 | Vector | Eps-15 | 37961 | 22026957 | 394  |
| Vector-OS-3 | Vector | Eps-15 | 37961 | 22026957 | 124  |
| Mef2-US-1   | Mef2   | Eps-15 | 37961 | 22026957 | 339  |
| Mef2-US-2   | Mef2   | Eps-15 | 37961 | 22026957 | 151  |
| p38a-1      | p38a   | Eps-15 | 37961 | 22026957 | 522  |
| p38a-2      | p38a   | Eps-15 | 37961 | 22026957 | 573  |
| p38a-3      | p38a   | Eps-15 | 37961 | 22026957 | 582  |
| p38a-4      | p38a   | Eps-15 | 37961 | 24762734 | 659  |
| p38c-1      | p38c   | Eps-15 | 37961 | 22026957 | 378  |
| p38c-2      | p38c   | Eps-15 | 37961 | 22026957 | 444  |
| p38c-3      | p38c   | Eps-15 | 37961 | 22026957 | 464  |
| p38c-4      | p38c   | Eps-15 | 37961 | 22026957 | 696  |
| Vector-US-1 | Vector | Vha55  | 41550 | 17136796 | 522  |
| Vector-US-2 | Vector | Vha55  | 41550 | 17136796 | 602  |
| Vector-US-3 | Vector | Vha55  | 41550 | 17136796 | 763  |
| Vector-US-4 | Vector | Vha55  | 41550 | 17136796 | 552  |
| Vector-HS-1 | Vector | Vha55  | 41550 | 17136796 | 256  |
| Vector-OS-1 | Vector | Vha55  | 41550 | 17136796 | 404  |
| Vector-OS-2 | Vector | Vha55  | 41550 | 17136796 | 76   |
| Vector-OS-3 | Vector | Vha55  | 41550 | 17136796 | 117  |
| Mef2-US-1   | Mef2   | Vha55  | 41550 | 17136796 | 225  |
| p38a-1      | p38a   | Vha55  | 41550 | 17136796 | 268  |

|             |        |             |       |          |     |
|-------------|--------|-------------|-------|----------|-----|
| p38a-2      | p38a   | Vha55       | 41550 | 17136796 | 542 |
| p38a-3      | p38a   | Vha55       | 41550 | 17136796 | 573 |
| p38a-4      | p38a   | Vha55       | 41550 | 17136796 | 197 |
| p38b-1      | p38b   | Vha55       | 41550 | 17136796 | 59  |
| p38c-1      | p38c   | Vha55       | 41550 | 17136796 | 474 |
| p38c-2      | p38c   | Vha55       | 41550 | 17136796 | 407 |
| p38c-3      | p38c   | Vha55       | 41550 | 17136796 | 386 |
| p38c-4      | p38c   | Vha55       | 41550 | 17136796 | 538 |
| Vector-US-1 | Vector | alphaTub84B | 40848 | 17136564 | 479 |
| Vector-US-2 | Vector | alphaTub84B | 40848 | 17136564 | 399 |
| Vector-US-3 | Vector | alphaTub84B | 40848 | 17136564 | 454 |
| Vector-US-4 | Vector | alphaTub84B | 40848 | 17136564 | 471 |
| Vector-HS-1 | Vector | alphaTub84B | 40848 | 17136564 | 317 |
| Vector-OS-1 | Vector | alphaTub84B | 40848 | 17136564 | 462 |
| Vector-OS-2 | Vector | alphaTub84B | 40848 | 17136564 | 116 |
| Vector-OS-3 | Vector | alphaTub84B | 40848 | 17136564 | 171 |
| Mef2-US-1   | Mef2   | alphaTub84B | 40848 | 17136564 | 267 |
| Mef2-US-2   | Mef2   | alphaTub84B | 40848 | 17136564 | 198 |
| p38a-1      | p38a   | alphaTub84B | 40848 | 17136564 | 256 |
| p38a-2      | p38a   | alphaTub84B | 40848 | 17136564 | 421 |
| p38a-3      | p38a   | alphaTub84B | 40848 | 17136564 | 481 |
| p38a-4      | p38a   | alphaTub84B | 40848 | 17136564 | 408 |
| p38b-1      | p38b   | alphaTub84B | 40848 | 17136564 | 164 |
| p38b-2      | p38b   | alphaTub84B | 40848 | 17136564 | 399 |
| p38b-3      | p38b   | alphaTub84B | 40848 | 17136564 | 474 |
| p38b-4      | p38b   | alphaTub84B | 40848 | 17136564 | 308 |
| p38c-1      | p38c   | alphaTub84B | 40848 | 17136564 | 465 |
| p38c-2      | p38c   | alphaTub84B | 40848 | 17136564 | 388 |
| p38c-3      | p38c   | alphaTub84B | 40848 | 17136564 | 455 |
| p38c-4      | p38c   | alphaTub84B | 40848 | 17136564 | 406 |
| Vector-US-1 | Vector | bel         | 45826 | 17985987 | 452 |
| Vector-US-2 | Vector | bel         | 45826 | 17985987 | 648 |
| Vector-US-3 | Vector | bel         | 45826 | 17985987 | 709 |
| Vector-US-4 | Vector | bel         | 45826 | 17985987 | 541 |
| Vector-OS-1 | Vector | bel         | 45826 | 17985987 | 658 |
| Mef2-US-1   | Mef2   | bel         | 45826 | 17985987 | 230 |
| Mef2-US-2   | Mef2   | bel         | 45826 | 17985987 | 385 |
| p38a-1      | p38a   | bel         | 45826 | 17985987 | 273 |
| p38a-2      | p38a   | bel         | 45826 | 17985987 | 395 |
| p38a-3      | p38a   | bel         | 45826 | 17985987 | 408 |
| p38a-4      | p38a   | bel         | 45826 | 17985987 | 200 |
| p38b-1      | p38b   | bel         | 45826 | 17985987 | 189 |
| p38b-2      | p38b   | bel         | 45826 | 17985987 | 118 |
| p38b-3      | p38b   | bel         | 45826 | 17985987 | 202 |
| p38b-4      | p38b   | bel         | 45826 | 17985987 | 117 |
| p38c-1      | p38c   | bel         | 45826 | 17985987 | 267 |
| p38c-2      | p38c   | bel         | 45826 | 17985987 | 420 |

|             |        |         |       |           |      |
|-------------|--------|---------|-------|-----------|------|
| p38c-3      | p38c   | bel     | 45826 | 17985987  | 152  |
| p38c-4      | p38c   | bel     | 45826 | 17985987  | 459  |
| Vector-US-1 | Vector | CG5525  | 34674 | 24583944  | 440  |
| Vector-US-2 | Vector | CG5525  | 34674 | 24583944  | 470  |
| Vector-US-3 | Vector | CG5525  | 34674 | 24583944  | 448  |
| Vector-US-4 | Vector | CG5525  | 34674 | 24583944  | 479  |
| Vector-HS-1 | Vector | CG5525  | 34674 | 24583944  | 233  |
| Vector-OS-1 | Vector | CG5525  | 34674 | 24583944  | 319  |
| Vector-OS-2 | Vector | CG5525  | 34674 | 24583944  | 92   |
| Vector-OS-3 | Vector | CG5525  | 34674 | 24583944  | 108  |
| Mef2-US-1   | Mef2   | CG5525  | 34674 | 24583944  | 101  |
| Mef2-US-2   | Mef2   | CG5525  | 34674 | 24583944  | 55   |
| p38a-1      | p38a   | CG5525  | 34674 | 24583944  | 247  |
| p38a-2      | p38a   | CG5525  | 34674 | 24583944  | 255  |
| p38a-3      | p38a   | CG5525  | 34674 | 24583944  | 448  |
| p38a-4      | p38a   | CG5525  | 34674 | 24583944  | 406  |
| p38b-1      | p38b   | CG5525  | 34674 | 24583944  | 204  |
| p38b-2      | p38b   | CG5525  | 34674 | 24583944  | 261  |
| p38b-3      | p38b   | CG5525  | 34674 | 24583944  | 534  |
| p38b-4      | p38b   | CG5525  | 34674 | 24583944  | 374  |
| p38c-1      | p38c   | CG5525  | 34674 | 24583944  | 427  |
| p38c-2      | p38c   | CG5525  | 34674 | 24583944  | 521  |
| p38c-3      | p38c   | CG5525  | 34674 | 24583944  | 392  |
| p38c-4      | p38c   | CG5525  | 34674 | 24583944  | 375  |
| Vector-US-1 | Vector | CG31974 | 33174 | 281360460 | 436  |
| Vector-US-2 | Vector | CG31974 | 33174 | 281360460 | 457  |
| Vector-US-3 | Vector | CG31974 | 33174 | 281360460 | 439  |
| Vector-US-4 | Vector | CG31974 | 33174 | 281360460 | 407  |
| Vector-HS-1 | Vector | CG31974 | 33174 | 281360460 | 628  |
| Vector-OS-1 | Vector | CG31974 | 33174 | 281360460 | 733  |
| Vector-OS-2 | Vector | CG31974 | 33174 | 281360460 | 312  |
| Vector-OS-3 | Vector | CG31974 | 33174 | 281360460 | 294  |
| Mef2-US-1   | Mef2   | CG31974 | 33174 | 281360460 | 388  |
| Mef2-US-2   | Mef2   | CG31974 | 33174 | 281360460 | 351  |
| p38a-1      | p38a   | CG31974 | 33174 | 281360460 | 217  |
| p38a-2      | p38a   | CG31974 | 33174 | 281360460 | 428  |
| p38a-3      | p38a   | CG31974 | 33174 | 281360460 | 355  |
| p38a-4      | p38a   | CG31974 | 33174 | 281360460 | 377  |
| p38c-1      | p38c   | CG31974 | 33174 | 281360460 | 472  |
| p38c-2      | p38c   | CG31974 | 33174 | 281360460 | 434  |
| p38c-3      | p38c   | CG31974 | 33174 | 281360460 | 490  |
| p38c-4      | p38c   | CG31974 | 33174 | 281360460 | 478  |
| Vector-US-1 | Vector | Map205  | 43765 | 17864160  | 434  |
| Vector-US-2 | Vector | Map205  | 43765 | 17864160  | 568  |
| Vector-US-3 | Vector | Map205  | 43765 | 17864160  | 1105 |
| Vector-US-4 | Vector | Map205  | 43765 | 17864160  | 258  |
| Vector-HS-1 | Vector | Map205  | 43765 | 17864160  | 481  |



|             |        |          |       |          |     |
|-------------|--------|----------|-------|----------|-----|
| Vector-OS-1 | Vector | Map205   | 43765 | 17864160 | 558 |
| Vector-OS-3 | Vector | Map205   | 43765 | 17864160 | 95  |
| Mef2-US-1   | Mef2   | Map205   | 43765 | 17864160 | 252 |
| Mef2-US-2   | Mef2   | Map205   | 43765 | 17864160 | 225 |
| p38a-1      | p38a   | Map205   | 43765 | 17864160 | 52  |
| p38a-2      | p38a   | Map205   | 43765 | 17864160 | 235 |
| p38a-3      | p38a   | Map205   | 43765 | 17864160 | 426 |
| p38a-4      | p38a   | Map205   | 43765 | 17864160 | 606 |
| p38b-1      | p38b   | Map205   | 43765 | 17864160 | 71  |
| p38b-4      | p38b   | Map205   | 43765 | 17864160 | 119 |
| p38c-1      | p38c   | Map205   | 43765 | 17864160 | 278 |
| p38c-2      | p38c   | Map205   | 43765 | 17864160 | 585 |
| p38c-3      | p38c   | Map205   | 43765 | 17864160 | 483 |
| p38c-4      | p38c   | Map205   | 43765 | 17864160 | 392 |
| Vector-US-1 | Vector | CG1910   | 43741 | 24651733 | 430 |
| Vector-US-4 | Vector | CG1910   | 43741 | 21356979 | 108 |
| p38a-1      | p38a   | CG1910   | 43741 | 21356979 | 84  |
| p38a-2      | p38a   | CG1910   | 43741 | 21356979 | 101 |
| p38c-2      | p38c   | CG1910   | 43741 | 21356979 | 163 |
| p38c-3      | p38c   | CG1910   | 43741 | 21356979 | 227 |
| Vector-US-1 | Vector | Cctgamma | 42029 | 24647510 | 430 |
| Vector-US-2 | Vector | Cctgamma | 42029 | 24647510 | 696 |
| Vector-US-3 | Vector | Cctgamma | 42029 | 24647510 | 558 |
| Vector-US-4 | Vector | Cctgamma | 42029 | 24647510 | 624 |
| Vector-HS-1 | Vector | Cctgamma | 42029 | 24647510 | 226 |
| Vector-OS-1 | Vector | Cctgamma | 42029 | 24647510 | 478 |
| Vector-OS-2 | Vector | Cctgamma | 42029 | 24647510 | 187 |
| Mef2-US-1   | Mef2   | Cctgamma | 42029 | 24647510 | 163 |
| p38a-1      | p38a   | Cctgamma | 42029 | 24647510 | 326 |
| p38a-2      | p38a   | Cctgamma | 42029 | 24647510 | 693 |
| p38a-3      | p38a   | Cctgamma | 42029 | 24647510 | 470 |
| p38a-4      | p38a   | Cctgamma | 42029 | 24647510 | 492 |
| p38b-1      | p38b   | Cctgamma | 42029 | 24647510 | 217 |
| p38b-2      | p38b   | Cctgamma | 42029 | 24647510 | 263 |
| p38b-3      | p38b   | Cctgamma | 42029 | 24647510 | 304 |
| p38b-4      | p38b   | Cctgamma | 42029 | 24647510 | 380 |
| p38c-1      | p38c   | Cctgamma | 42029 | 24647510 | 567 |
| p38c-2      | p38c   | Cctgamma | 42029 | 24647510 | 579 |
| p38c-3      | p38c   | Cctgamma | 42029 | 24647510 | 449 |
| p38c-4      | p38c   | Cctgamma | 42029 | 24647510 | 408 |
| Vector-US-1 | Vector | Tcp-1eta | 41054 | 24645179 | 427 |
| Vector-US-2 | Vector | Tcp-1eta | 41054 | 24645179 | 603 |
| Vector-US-3 | Vector | Tcp-1eta | 41054 | 24645179 | 876 |
| Vector-US-4 | Vector | Tcp-1eta | 41054 | 24645179 | 698 |
| Vector-HS-1 | Vector | Tcp-1eta | 41054 | 24645179 | 550 |
| Vector-OS-1 | Vector | Tcp-1eta | 41054 | 24645179 | 725 |
| Vector-OS-2 | Vector | Tcp-1eta | 41054 | 24645179 | 48  |

|             |        |           |       |          |     |
|-------------|--------|-----------|-------|----------|-----|
| Vector-OS-3 | Vector | Tcp-1eta  | 41054 | 24645179 | 122 |
| Mef2-US-1   | Mef2   | Tcp-1eta  | 41054 | 24645179 | 353 |
| Mef2-US-2   | Mef2   | Tcp-1eta  | 41054 | 24645179 | 261 |
| p38a-1      | p38a   | Tcp-1eta  | 41054 | 24645179 | 329 |
| p38a-2      | p38a   | Tcp-1eta  | 41054 | 24645179 | 555 |
| p38a-3      | p38a   | Tcp-1eta  | 41054 | 24645179 | 790 |
| p38a-4      | p38a   | Tcp-1eta  | 41054 | 24645179 | 592 |
| p38b-1      | p38b   | Tcp-1eta  | 41054 | 24645179 | 448 |
| p38b-2      | p38b   | Tcp-1eta  | 41054 | 24645179 | 409 |
| p38b-3      | p38b   | Tcp-1eta  | 41054 | 24645179 | 636 |
| p38b-4      | p38b   | Tcp-1eta  | 41054 | 24645179 | 750 |
| p38c-1      | p38c   | Tcp-1eta  | 41054 | 24645179 | 650 |
| p38c-2      | p38c   | Tcp-1eta  | 41054 | 24645179 | 723 |
| p38c-3      | p38c   | Tcp-1eta  | 41054 | 24645179 | 737 |
| p38c-4      | p38c   | Tcp-1eta  | 41054 | 24645179 | 713 |
| Vector-US-1 | Vector | Hop       | 33202 | 17137540 | 412 |
| Vector-US-2 | Vector | Hop       | 33202 | 17137540 | 209 |
| Vector-US-3 | Vector | Hop       | 33202 | 17137540 | 250 |
| Vector-US-4 | Vector | Hop       | 33202 | 17137540 | 329 |
| Vector-HS-1 | Vector | Hop       | 33202 | 17137540 | 400 |
| Vector-OS-1 | Vector | Hop       | 33202 | 17137540 | 702 |
| Vector-OS-2 | Vector | Hop       | 33202 | 17137540 | 62  |
| Mef2-US-1   | Mef2   | Hop       | 33202 | 17137540 | 133 |
| Mef2-US-2   | Mef2   | Hop       | 33202 | 17137540 | 283 |
| p38a-1      | p38a   | Hop       | 33202 | 17137540 | 117 |
| p38a-2      | p38a   | Hop       | 33202 | 17137540 | 224 |
| p38a-3      | p38a   | Hop       | 33202 | 17137540 | 167 |
| p38a-4      | p38a   | Hop       | 33202 | 17137540 | 381 |
| p38b-2      | p38b   | Hop       | 33202 | 17137540 | 171 |
| p38b-3      | p38b   | Hop       | 33202 | 17137540 | 276 |
| p38b-4      | p38b   | Hop       | 33202 | 17137540 | 186 |
| p38c-1      | p38c   | Hop       | 33202 | 17137540 | 388 |
| p38c-2      | p38c   | Hop       | 33202 | 17137540 | 531 |
| p38c-3      | p38c   | Hop       | 33202 | 17137540 | 220 |
| p38c-4      | p38c   | Hop       | 33202 | 17137540 | 305 |
| Vector-US-1 | Vector | Tcp-1zeta | 32518 | 18859933 | 411 |
| Vector-US-2 | Vector | Tcp-1zeta | 32518 | 18859933 | 668 |
| Vector-US-3 | Vector | Tcp-1zeta | 32518 | 18859933 | 514 |
| Vector-US-4 | Vector | Tcp-1zeta | 32518 | 18859933 | 512 |
| Vector-HS-1 | Vector | Tcp-1zeta | 32518 | 18859933 | 452 |
| Vector-OS-1 | Vector | Tcp-1zeta | 32518 | 18859933 | 523 |
| Vector-OS-2 | Vector | Tcp-1zeta | 32518 | 18859933 | 146 |
| Vector-OS-3 | Vector | Tcp-1zeta | 32518 | 18859933 | 94  |
| Mef2-US-1   | Mef2   | Tcp-1zeta | 32518 | 18859933 | 211 |
| Mef2-US-2   | Mef2   | Tcp-1zeta | 32518 | 18859933 | 127 |
| p38a-1      | p38a   | Tcp-1zeta | 32518 | 18859933 | 292 |
| p38a-2      | p38a   | Tcp-1zeta | 32518 | 18859933 | 535 |

|             |        |             |       |          |     |
|-------------|--------|-------------|-------|----------|-----|
| p38a-3      | p38a   | Tcp-1zeta   | 32518 | 18859933 | 385 |
| p38a-4      | p38a   | Tcp-1zeta   | 32518 | 18859933 | 461 |
| p38b-1      | p38b   | Tcp-1zeta   | 32518 | 18859933 | 252 |
| p38b-2      | p38b   | Tcp-1zeta   | 32518 | 18859933 | 137 |
| p38b-3      | p38b   | Tcp-1zeta   | 32518 | 18859933 | 287 |
| p38b-4      | p38b   | Tcp-1zeta   | 32518 | 18859933 | 370 |
| p38c-1      | p38c   | Tcp-1zeta   | 32518 | 18859933 | 483 |
| p38c-2      | p38c   | Tcp-1zeta   | 32518 | 18859933 | 412 |
| p38c-3      | p38c   | Tcp-1zeta   | 32518 | 18859933 | 326 |
| p38c-4      | p38c   | Tcp-1zeta   | 32518 | 18859933 | 470 |
| Vector-US-1 | Vector | Gp93        | 43354 | 21357739 | 406 |
| Vector-US-2 | Vector | Gp93        | 43354 | 21357739 | 597 |
| Vector-US-3 | Vector | Gp93        | 43354 | 21357739 | 446 |
| Vector-US-4 | Vector | Gp93        | 43354 | 21357739 | 555 |
| Vector-HS-1 | Vector | Gp93        | 43354 | 21357739 | 147 |
| Vector-OS-1 | Vector | Gp93        | 43354 | 21357739 | 675 |
| Mef2-US-1   | Mef2   | Gp93        | 43354 | 21357739 | 58  |
| Mef2-US-2   | Mef2   | Gp93        | 43354 | 21357739 | 118 |
| p38a-1      | p38a   | Gp93        | 43354 | 21357739 | 259 |
| p38a-2      | p38a   | Gp93        | 43354 | 21357739 | 418 |
| p38a-3      | p38a   | Gp93        | 43354 | 21357739 | 435 |
| p38a-4      | p38a   | Gp93        | 43354 | 21357739 | 233 |
| p38b-1      | p38b   | Gp93        | 43354 | 21357739 | 270 |
| p38b-2      | p38b   | Gp93        | 43354 | 21357739 | 228 |
| p38b-3      | p38b   | Gp93        | 43354 | 21357739 | 54  |
| p38b-4      | p38b   | Gp93        | 43354 | 21357739 | 132 |
| p38c-1      | p38c   | Gp93        | 43354 | 21357739 | 628 |
| p38c-2      | p38c   | Gp93        | 43354 | 21357739 | 657 |
| p38c-3      | p38c   | Gp93        | 43354 | 21357739 | 364 |
| p38c-4      | p38c   | Gp93        | 43354 | 21357739 | 826 |
| Vector-US-1 | Vector | Pdi         | 39651 | 17647799 | 398 |
| Vector-US-2 | Vector | Pdi         | 39651 | 17647799 | 89  |
| Vector-US-3 | Vector | Pdi         | 39651 | 17647799 | 101 |
| Vector-US-4 | Vector | Pdi         | 39651 | 17647799 | 338 |
| Vector-OS-1 | Vector | Pdi         | 39651 | 17647799 | 617 |
| Vector-OS-2 | Vector | Pdi         | 39651 | 17647799 | 109 |
| Vector-OS-3 | Vector | Pdi         | 39651 | 17647799 | 46  |
| p38a-1      | p38a   | Pdi         | 39651 | 17647799 | 38  |
| p38a-2      | p38a   | Pdi         | 39651 | 17647799 | 92  |
| p38a-3      | p38a   | Pdi         | 39651 | 17647799 | 156 |
| p38a-4      | p38a   | Pdi         | 39651 | 17647799 | 56  |
| p38c-1      | p38c   | Pdi         | 39651 | 17647799 | 143 |
| p38c-2      | p38c   | Pdi         | 39651 | 17647799 | 115 |
| p38c-3      | p38c   | Pdi         | 39651 | 17647799 | 154 |
| p38c-4      | p38c   | Pdi         | 39651 | 17647799 | 255 |
| Vector-US-1 | Vector | Ef1alpha48D | 36271 | 17137572 | 395 |
| Vector-US-2 | Vector | Ef1alpha48D | 36271 | 17137572 | 300 |

|             |        |             |       |          |     |
|-------------|--------|-------------|-------|----------|-----|
| Vector-US-3 | Vector | Ef1alpha48D | 36271 | 17137572 | 306 |
| Vector-US-4 | Vector | Ef1alpha48D | 36271 | 17137572 | 477 |
| Vector-HS-1 | Vector | Ef1alpha48D | 36271 | 17137572 | 409 |
| Vector-OS-1 | Vector | Ef1alpha48D | 36271 | 17137572 | 243 |
| Vector-OS-2 | Vector | Ef1alpha48D | 36271 | 17137572 | 72  |
| Vector-OS-3 | Vector | Ef1alpha48D | 36271 | 17137572 | 100 |
| Mef2-US-1   | Mef2   | Ef1alpha48D | 36271 | 17137572 | 372 |
| Mef2-US-2   | Mef2   | Ef1alpha48D | 36271 | 17137572 | 282 |
| p38a-1      | p38a   | Ef1alpha48D | 36271 | 17137572 | 360 |
| p38a-2      | p38a   | Ef1alpha48D | 36271 | 17137572 | 419 |
| p38a-3      | p38a   | Ef1alpha48D | 36271 | 17137572 | 540 |
| p38a-4      | p38a   | Ef1alpha48D | 36271 | 17137572 | 370 |
| p38b-1      | p38b   | Ef1alpha48D | 36271 | 17137572 | 426 |
| p38b-2      | p38b   | Ef1alpha48D | 36271 | 17137572 | 300 |
| p38b-3      | p38b   | Ef1alpha48D | 36271 | 17137572 | 358 |
| p38b-4      | p38b   | Ef1alpha48D | 36271 | 17137572 | 377 |
| p38c-1      | p38c   | Ef1alpha48D | 36271 | 17137572 | 302 |
| p38c-2      | p38c   | Ef1alpha48D | 36271 | 17137572 | 370 |
| p38c-3      | p38c   | Ef1alpha48D | 36271 | 17137572 | 371 |
| p38c-4      | p38c   | Ef1alpha48D | 36271 | 17137572 | 345 |
| Vector-US-1 | Vector | Cct5        | 36308 | 17647245 | 389 |
| Vector-US-2 | Vector | Cct5        | 36308 | 24652903 | 467 |
| Vector-US-3 | Vector | Cct5        | 36308 | 24652903 | 389 |
| Vector-US-4 | Vector | Cct5        | 36308 | 24652903 | 432 |
| Vector-HS-1 | Vector | Cct5        | 36308 | 17647245 | 323 |
| Vector-OS-1 | Vector | Cct5        | 36308 | 17647245 | 475 |
| Vector-OS-2 | Vector | Cct5        | 36308 | 17647245 | 186 |
| Vector-OS-3 | Vector | Cct5        | 36308 | 17647245 | 218 |
| Mef2-US-1   | Mef2   | Cct5        | 36308 | 17647245 | 161 |
| p38a-1      | p38a   | Cct5        | 36308 | 24652903 | 114 |
| p38a-2      | p38a   | Cct5        | 36308 | 17647245 | 347 |
| p38a-3      | p38a   | Cct5        | 36308 | 24652903 | 560 |
| p38a-4      | p38a   | Cct5        | 36308 | 24652903 | 294 |
| p38b-1      | p38b   | Cct5        | 36308 | 24652903 | 224 |
| p38b-2      | p38b   | Cct5        | 36308 | 17647245 | 188 |
| p38b-3      | p38b   | Cct5        | 36308 | 17647245 | 325 |
| p38b-4      | p38b   | Cct5        | 36308 | 17647245 | 309 |
| p38c-1      | p38c   | Cct5        | 36308 | 17647245 | 351 |
| p38c-2      | p38c   | Cct5        | 36308 | 17647245 | 477 |
| p38c-3      | p38c   | Cct5        | 36308 | 17647245 | 322 |
| p38c-4      | p38c   | Cct5        | 36308 | 24652903 | 350 |
| Vector-US-1 | Vector | betaTub56D  | 37238 | 24655737 | 385 |
| Vector-US-2 | Vector | betaTub56D  | 37238 | 24655737 | 379 |
| Vector-US-3 | Vector | betaTub56D  | 37238 | 24655737 | 359 |
| Vector-US-4 | Vector | betaTub56D  | 37238 | 24655737 | 448 |
| Vector-HS-1 | Vector | betaTub56D  | 37238 | 24655737 | 304 |
| Vector-OS-1 | Vector | betaTub56D  | 37238 | 24655737 | 450 |

|             |        |            |       |          |     |
|-------------|--------|------------|-------|----------|-----|
| Vector-OS-2 | Vector | betaTub56D | 37238 | 24655737 | 234 |
| Vector-OS-3 | Vector | betaTub56D | 37238 | 24655737 | 156 |
| Mef2-US-1   | Mef2   | betaTub56D | 37238 | 24655737 | 357 |
| Mef2-US-2   | Mef2   | betaTub56D | 37238 | 24655737 | 191 |
| p38a-1      | p38a   | betaTub56D | 37238 | 24655737 | 413 |
| p38a-2      | p38a   | betaTub56D | 37238 | 24655737 | 331 |
| p38a-3      | p38a   | betaTub56D | 37238 | 24655737 | 402 |
| p38a-4      | p38a   | betaTub56D | 37238 | 24655737 | 450 |
| p38b-1      | p38b   | betaTub56D | 37238 | 24655737 | 338 |
| p38b-2      | p38b   | betaTub56D | 37238 | 24655737 | 268 |
| p38b-3      | p38b   | betaTub56D | 37238 | 24655737 | 334 |
| p38b-4      | p38b   | betaTub56D | 37238 | 24655737 | 311 |
| p38c-1      | p38c   | betaTub56D | 37238 | 24655737 | 372 |
| p38c-2      | p38c   | betaTub56D | 37238 | 24655737 | 394 |
| p38c-3      | p38c   | betaTub56D | 37238 | 24655737 | 516 |
| p38c-4      | p38c   | betaTub56D | 37238 | 24655737 | 327 |
| Vector-US-1 | Vector | CG2918     | 31215 | 20128923 | 380 |
| Vector-US-2 | Vector | CG2918     | 31215 | 20128923 | 346 |
| Vector-US-3 | Vector | CG2918     | 31215 | 20128923 | 206 |
| Vector-US-4 | Vector | CG2918     | 31215 | 20128923 | 214 |
| Vector-OS-1 | Vector | CG2918     | 31215 | 20128923 | 487 |
| Vector-OS-2 | Vector | CG2918     | 31215 | 20128923 | 75  |
| Mef2-US-1   | Mef2   | CG2918     | 31215 | 20128923 | 173 |
| p38a-1      | p38a   | CG2918     | 31215 | 20128923 | 129 |
| p38a-2      | p38a   | CG2918     | 31215 | 20128923 | 81  |
| p38a-3      | p38a   | CG2918     | 31215 | 20128923 | 90  |
| p38a-4      | p38a   | CG2918     | 31215 | 20128923 | 230 |
| p38b-3      | p38b   | CG2918     | 31215 | 20128923 | 76  |
| p38c-1      | p38c   | CG2918     | 31215 | 20128923 | 314 |
| p38c-2      | p38c   | CG2918     | 31215 | 20128923 | 298 |
| p38c-3      | p38c   | CG2918     | 31215 | 20128923 | 126 |
| p38c-4      | p38c   | CG2918     | 31215 | 20128923 | 255 |
| Vector-US-1 | Vector | Ef1beta    | 45249 | 45549259 | 375 |
| Vector-US-2 | Vector | Ef1beta    | 45249 | 45549259 | 343 |
| Vector-US-3 | Vector | Ef1beta    | 45249 | 45549259 | 268 |
| Vector-US-4 | Vector | Ef1beta    | 45249 | 45549259 | 468 |
| Vector-HS-1 | Vector | Ef1beta    | 45249 | 45549259 | 414 |
| Vector-OS-1 | Vector | Ef1beta    | 45249 | 45549259 | 604 |
| Vector-OS-2 | Vector | Ef1beta    | 45249 | 45549259 | 217 |
| Vector-OS-3 | Vector | Ef1beta    | 45249 | 45549259 | 189 |
| Mef2-US-1   | Mef2   | Ef1beta    | 45249 | 45549259 | 229 |
| Mef2-US-2   | Mef2   | Ef1beta    | 45249 | 45549259 | 69  |
| p38a-1      | p38a   | Ef1beta    | 45249 | 45549259 | 310 |
| p38a-2      | p38a   | Ef1beta    | 45249 | 45549259 | 485 |
| p38a-3      | p38a   | Ef1beta    | 45249 | 45549259 | 253 |
| p38a-4      | p38a   | Ef1beta    | 45249 | 45549259 | 228 |
| p38b-1      | p38b   | Ef1beta    | 45249 | 45549259 | 240 |

|             |        |         |       |          |     |
|-------------|--------|---------|-------|----------|-----|
| p38b-2      | p38b   | Ef1beta | 45249 | 45549259 | 157 |
| p38b-3      | p38b   | Ef1beta | 45249 | 45549259 | 390 |
| p38b-4      | p38b   | Ef1beta | 45249 | 45549259 | 463 |
| p38c-1      | p38c   | Ef1beta | 45249 | 45549259 | 474 |
| p38c-2      | p38c   | Ef1beta | 45249 | 45549259 | 565 |
| p38c-3      | p38c   | Ef1beta | 45249 | 45549259 | 419 |
| p38c-4      | p38c   | Ef1beta | 45249 | 45549259 | 391 |
| Vector-US-1 | Vector | Vha68-2 | 45012 | 24583984 | 370 |
| Vector-US-2 | Vector | Vha68-2 | 45012 | 24583984 | 152 |
| Vector-US-3 | Vector | Vha68-2 | 45012 | 24583984 | 289 |
| Vector-US-4 | Vector | Vha68-2 | 45012 | 24583984 | 227 |
| Vector-OS-1 | Vector | Vha68-2 | 45012 | 24583984 | 230 |
| p38a-1      | p38a   | Vha68-2 | 45012 | 24583984 | 118 |
| p38a-2      | p38a   | Vha68-2 | 45012 | 24583984 | 98  |
| p38a-3      | p38a   | Vha68-2 | 45012 | 24583984 | 102 |
| p38a-4      | p38a   | Vha68-2 | 45012 | 24583984 | 238 |
| p38b-2      | p38b   | Vha68-2 | 45012 | 24583984 | 49  |
| p38b-3      | p38b   | Vha68-2 | 45012 | 24583984 | 52  |
| p38b-4      | p38b   | Vha68-2 | 45012 | 24583984 | 89  |
| p38c-1      | p38c   | Vha68-2 | 45012 | 24583984 | 213 |
| p38c-2      | p38c   | Vha68-2 | 45012 | 24583984 | 221 |
| p38c-3      | p38c   | Vha68-2 | 45012 | 24583984 | 252 |
| p38c-4      | p38c   | Vha68-2 | 45012 | 24583984 | 269 |
| Vector-US-1 | Vector | CG8258  | 35882 | 19921848 | 369 |
| Vector-US-2 | Vector | CG8258  | 35882 | 19921848 | 515 |
| Vector-US-3 | Vector | CG8258  | 35882 | 19921848 | 405 |
| Vector-US-4 | Vector | CG8258  | 35882 | 19921848 | 574 |
| Vector-HS-1 | Vector | CG8258  | 35882 | 19921848 | 298 |
| Vector-OS-1 | Vector | CG8258  | 35882 | 19921848 | 396 |
| Mef2-US-1   | Mef2   | CG8258  | 35882 | 19921848 | 234 |
| p38a-1      | p38a   | CG8258  | 35882 | 19921848 | 216 |
| p38a-2      | p38a   | CG8258  | 35882 | 19921848 | 391 |
| p38a-3      | p38a   | CG8258  | 35882 | 19921848 | 511 |
| p38a-4      | p38a   | CG8258  | 35882 | 19921848 | 396 |
| p38b-1      | p38b   | CG8258  | 35882 | 19921848 | 227 |
| p38b-2      | p38b   | CG8258  | 35882 | 19921848 | 132 |
| p38b-3      | p38b   | CG8258  | 35882 | 19921848 | 201 |
| p38b-4      | p38b   | CG8258  | 35882 | 19921848 | 310 |
| p38c-1      | p38c   | CG8258  | 35882 | 19921848 | 369 |
| p38c-2      | p38c   | CG8258  | 35882 | 19921848 | 270 |
| p38c-3      | p38c   | CG8258  | 35882 | 19921848 | 436 |
| p38c-4      | p38c   | CG8258  | 35882 | 19921848 | 485 |
| Vector-US-1 | Vector | CG7033  | 31838 | 18858175 | 367 |
| Vector-US-2 | Vector | CG7033  | 31838 | 18858175 | 479 |
| Vector-US-3 | Vector | CG7033  | 31838 | 18858175 | 381 |
| Vector-US-4 | Vector | CG7033  | 31838 | 18858175 | 523 |
| Vector-HS-1 | Vector | CG7033  | 31838 | 18858175 | 291 |

|             |        |           |       |          |     |
|-------------|--------|-----------|-------|----------|-----|
| Vector-OS-1 | Vector | CG7033    | 31838 | 18858175 | 416 |
| Vector-OS-2 | Vector | CG7033    | 31838 | 18858175 | 146 |
| Vector-OS-3 | Vector | CG7033    | 31838 | 18858175 | 137 |
| Mef2-US-1   | Mef2   | CG7033    | 31838 | 18858175 | 273 |
| Mef2-US-2   | Mef2   | CG7033    | 31838 | 18858175 | 257 |
| p38a-1      | p38a   | CG7033    | 31838 | 18858175 | 474 |
| p38a-2      | p38a   | CG7033    | 31838 | 18858175 | 508 |
| p38a-3      | p38a   | CG7033    | 31838 | 18858175 | 565 |
| p38a-4      | p38a   | CG7033    | 31838 | 18858175 | 425 |
| p38b-1      | p38b   | CG7033    | 31838 | 18858175 | 429 |
| p38b-2      | p38b   | CG7033    | 31838 | 18858175 | 304 |
| p38b-3      | p38b   | CG7033    | 31838 | 28571140 | 495 |
| p38b-4      | p38b   | CG7033    | 31838 | 28571140 | 619 |
| p38c-1      | p38c   | CG7033    | 31838 | 28571140 | 569 |
| p38c-2      | p38c   | CG7033    | 31838 | 28571140 | 558 |
| p38c-3      | p38c   | CG7033    | 31838 | 28571140 | 625 |
| p38c-4      | p38c   | CG7033    | 31838 | 18858175 | 345 |
| Vector-US-1 | Vector | ERp60     | 36270 | 45551086 | 364 |
| Vector-US-2 | Vector | ERp60     | 36270 | 45551086 | 264 |
| Vector-US-3 | Vector | ERp60     | 36270 | 45551086 | 337 |
| Vector-US-4 | Vector | ERp60     | 36270 | 45551086 | 165 |
| Vector-HS-1 | Vector | ERp60     | 36270 | 45551086 | 180 |
| Vector-OS-1 | Vector | ERp60     | 36270 | 45551086 | 662 |
| Vector-OS-2 | Vector | ERp60     | 36270 | 45551086 | 89  |
| Vector-OS-3 | Vector | ERp60     | 36270 | 45551086 | 68  |
| Mef2-US-1   | Mef2   | ERp60     | 36270 | 45551086 | 156 |
| Mef2-US-2   | Mef2   | ERp60     | 36270 | 45551086 | 139 |
| p38a-1      | p38a   | ERp60     | 36270 | 45551086 | 327 |
| p38a-2      | p38a   | ERp60     | 36270 | 45551086 | 206 |
| p38a-3      | p38a   | ERp60     | 36270 | 45551086 | 98  |
| p38a-4      | p38a   | ERp60     | 36270 | 45551086 | 164 |
| p38b-1      | p38b   | ERp60     | 36270 | 45551086 | 169 |
| p38b-2      | p38b   | ERp60     | 36270 | 45551086 | 212 |
| p38c-1      | p38c   | ERp60     | 36270 | 45551086 | 207 |
| p38c-2      | p38c   | ERp60     | 36270 | 45551086 | 151 |
| p38c-3      | p38c   | ERp60     | 36270 | 45551086 | 94  |
| p38c-4      | p38c   | ERp60     | 36270 | 45551086 | 269 |
| Vector-US-1 | Vector | eEF1delta | 34363 | 19921046 | 357 |
| Vector-US-2 | Vector | eEF1delta | 34363 | 19921046 | 395 |
| Vector-US-3 | Vector | eEF1delta | 34363 | 19921046 | 437 |
| Vector-US-4 | Vector | eEF1delta | 34363 | 19921046 | 408 |
| Vector-HS-1 | Vector | eEF1delta | 34363 | 19921046 | 378 |
| Vector-OS-1 | Vector | eEF1delta | 34363 | 19921046 | 559 |
| Vector-OS-2 | Vector | eEF1delta | 34363 | 19921046 | 195 |
| Vector-OS-3 | Vector | eEF1delta | 34363 | 19921046 | 196 |
| Mef2-US-1   | Mef2   | eEF1delta | 34363 | 19921046 | 177 |
| Mef2-US-2   | Mef2   | eEF1delta | 34363 | 19921046 | 97  |

|             |        |           |       |          |     |
|-------------|--------|-----------|-------|----------|-----|
| p38a-1      | p38a   | eEF1delta | 34363 | 19921046 | 263 |
| p38a-2      | p38a   | eEF1delta | 34363 | 19921046 | 268 |
| p38a-3      | p38a   | eEF1delta | 34363 | 19921046 | 354 |
| p38a-4      | p38a   | eEF1delta | 34363 | 19921046 | 461 |
| p38b-1      | p38b   | eEF1delta | 34363 | 19921046 | 90  |
| p38b-2      | p38b   | eEF1delta | 34363 | 19921046 | 285 |
| p38b-3      | p38b   | eEF1delta | 34363 | 19921046 | 106 |
| p38b-4      | p38b   | eEF1delta | 34363 | 19921046 | 321 |
| p38c-1      | p38c   | eEF1delta | 34363 | 19921046 | 283 |
| p38c-2      | p38c   | eEF1delta | 34363 | 19921046 | 412 |
| p38c-3      | p38c   | eEF1delta | 34363 | 19921046 | 450 |
| p38c-4      | p38c   | eEF1delta | 34363 | 19921046 | 284 |
| Vector-US-1 | Vector | Akap200   | 34170 | 17137718 | 350 |
| Vector-US-2 | Vector | Akap200   | 34170 | 17137718 | 403 |
| Vector-US-3 | Vector | Akap200   | 34170 | 17137718 | 317 |
| Vector-US-4 | Vector | Akap200   | 34170 | 17137718 | 285 |
| Vector-HS-1 | Vector | Akap200   | 34170 | 17137716 | 215 |
| Vector-OS-1 | Vector | Akap200   | 34170 | 17137718 | 197 |
| Vector-OS-3 | Vector | Akap200   | 34170 | 17137718 | 67  |
| Mef2-US-1   | Mef2   | Akap200   | 34170 | 17137718 | 262 |
| Mef2-US-2   | Mef2   | Akap200   | 34170 | 17137716 | 63  |
| p38a-1      | p38a   | Akap200   | 34170 | 17137718 | 355 |
| p38a-2      | p38a   | Akap200   | 34170 | 17137718 | 259 |
| p38a-3      | p38a   | Akap200   | 34170 | 17137718 | 167 |
| p38a-4      | p38a   | Akap200   | 34170 | 17137718 | 266 |
| p38b-1      | p38b   | Akap200   | 34170 | 17137718 | 212 |
| p38b-2      | p38b   | Akap200   | 34170 | 17137718 | 170 |
| p38b-3      | p38b   | Akap200   | 34170 | 17137718 | 193 |
| p38b-4      | p38b   | Akap200   | 34170 | 17137718 | 189 |
| p38c-1      | p38c   | Akap200   | 34170 | 17137718 | 276 |
| p38c-2      | p38c   | Akap200   | 34170 | 17137718 | 313 |
| p38c-3      | p38c   | Akap200   | 34170 | 28574063 | 378 |
| p38c-4      | p38c   | Akap200   | 34170 | 17137718 | 319 |
| Vector-US-1 | Vector | lig       | 35771 | 62471671 | 349 |
| Vector-US-2 | Vector | lig       | 35771 | 62471671 | 427 |
| Vector-US-3 | Vector | lig       | 35771 | 62471671 | 270 |
| Vector-US-4 | Vector | lig       | 35771 | 62471671 | 374 |
| Vector-HS-1 | Vector | lig       | 35771 | 62471671 | 281 |
| Vector-OS-1 | Vector | lig       | 35771 | 62471671 | 443 |
| Mef2-US-1   | Mef2   | lig       | 35771 | 62471671 | 160 |
| Mef2-US-2   | Mef2   | lig       | 35771 | 62471671 | 212 |
| p38a-1      | p38a   | lig       | 35771 | 62471671 | 168 |
| p38a-2      | p38a   | lig       | 35771 | 62471671 | 266 |
| p38a-3      | p38a   | lig       | 35771 | 62471671 | 289 |
| p38a-4      | p38a   | lig       | 35771 | 62471671 | 80  |
| p38b-1      | p38b   | lig       | 35771 | 62471671 | 151 |
| p38b-3      | p38b   | lig       | 35771 | 62471671 | 101 |



|             |        |               |       |          |     |
|-------------|--------|---------------|-------|----------|-----|
| p38b-4      | p38b   | lig           | 35771 | 62471671 | 91  |
| p38c-1      | p38c   | lig           | 35771 | 62471671 | 246 |
| p38c-2      | p38c   | lig           | 35771 | 62471671 | 321 |
| p38c-3      | p38c   | lig           | 35771 | 62471671 | 251 |
| p38c-4      | p38c   | lig           | 35771 | 62471671 | 460 |
| Vector-US-1 | Vector | CG10984       | 39446 | 28574508 | 332 |
| Vector-US-2 | Vector | CG10984       | 39446 | 28574508 | 140 |
| Vector-US-3 | Vector | CG10984       | 39446 | 28574508 | 123 |
| Vector-US-4 | Vector | CG10984       | 39446 | 28574508 | 56  |
| Vector-HS-1 | Vector | CG10984       | 39446 | 28574508 | 209 |
| Vector-OS-1 | Vector | CG10984       | 39446 | 28574508 | 396 |
| Mef2-US-1   | Mef2   | CG10984       | 39446 | 28574508 | 70  |
| Mef2-US-2   | Mef2   | CG10984       | 39446 | 28574508 | 216 |
| p38a-1      | p38a   | CG10984       | 39446 | 28574508 | 52  |
| p38a-2      | p38a   | CG10984       | 39446 | 28574508 | 37  |
| p38a-3      | p38a   | CG10984       | 39446 | 28574508 | 168 |
| p38a-4      | p38a   | CG10984       | 39446 | 28574508 | 55  |
| p38c-1      | p38c   | CG10984       | 39446 | 28574508 | 159 |
| p38c-2      | p38c   | CG10984       | 39446 | 28574508 | 149 |
| p38c-3      | p38c   | CG10984       | 39446 | 28574508 | 231 |
| p38c-4      | p38c   | CG10984       | 39446 | 28574508 | 216 |
| Vector-US-1 | Vector | 14-3-3epsilon | 42186 | 24647885 | 323 |
| Vector-US-2 | Vector | 14-3-3epsilon | 42186 | 24647885 | 224 |
| Vector-US-3 | Vector | 14-3-3epsilon | 42186 | 24647885 | 206 |
| Vector-US-4 | Vector | 14-3-3epsilon | 42186 | 24647885 | 218 |
| Vector-HS-1 | Vector | 14-3-3epsilon | 42186 | 24647885 | 89  |
| Vector-OS-1 | Vector | 14-3-3epsilon | 42186 | 24647885 | 173 |
| Vector-OS-2 | Vector | 14-3-3epsilon | 42186 | 24647885 | 135 |
| Vector-OS-3 | Vector | 14-3-3epsilon | 42186 | 24647885 | 91  |
| Mef2-US-1   | Mef2   | 14-3-3epsilon | 42186 | 24647885 | 289 |
| Mef2-US-2   | Mef2   | 14-3-3epsilon | 42186 | 24647885 | 533 |
| p38a-1      | p38a   | 14-3-3epsilon | 42186 | 24647885 | 42  |
| p38a-2      | p38a   | 14-3-3epsilon | 42186 | 24647885 | 149 |
| p38a-3      | p38a   | 14-3-3epsilon | 42186 | 24647885 | 138 |
| p38a-4      | p38a   | 14-3-3epsilon | 42186 | 24647885 | 182 |
| p38b-1      | p38b   | 14-3-3epsilon | 42186 | 24647885 | 95  |
| p38b-2      | p38b   | 14-3-3epsilon | 42186 | 24647885 | 106 |
| p38b-3      | p38b   | 14-3-3epsilon | 42186 | 24647885 | 113 |
| p38b-4      | p38b   | 14-3-3epsilon | 42186 | 24647885 | 115 |
| p38c-1      | p38c   | 14-3-3epsilon | 42186 | 24647885 | 117 |
| p38c-2      | p38c   | 14-3-3epsilon | 42186 | 24647885 | 146 |
| p38c-3      | p38c   | 14-3-3epsilon | 42186 | 24647885 | 86  |
| Vector-US-1 | Vector | Inos          | 35671 | 17137626 | 319 |
| Vector-US-2 | Vector | Inos          | 35671 | 17137626 | 132 |
| Vector-US-3 | Vector | Inos          | 35671 | 17137626 | 153 |
| Vector-US-4 | Vector | Inos          | 35671 | 17137626 | 149 |
| Vector-OS-1 | Vector | Inos          | 35671 | 17137626 | 183 |

|             |        |         |       |           |     |
|-------------|--------|---------|-------|-----------|-----|
| Vector-OS-2 | Vector | Inos    | 35671 | 17137626  | 73  |
| Vector-OS-3 | Vector | Inos    | 35671 | 17137626  | 69  |
| p38a-2      | p38a   | Inos    | 35671 | 17137626  | 37  |
| p38b-1      | p38b   | Inos    | 35671 | 17137626  | 34  |
| p38c-1      | p38c   | Inos    | 35671 | 17137626  | 175 |
| p38c-2      | p38c   | Inos    | 35671 | 17137626  | 171 |
| p38c-3      | p38c   | Inos    | 35671 | 17137626  | 63  |
| p38c-4      | p38c   | Inos    | 35671 | 17137626  | 202 |
| Vector-US-1 | Vector | Past1   | 41569 | 24646379  | 316 |
| Vector-US-2 | Vector | Past1   | 41569 | 24646379  | 58  |
| Vector-US-3 | Vector | Past1   | 41569 | 24646379  | 120 |
| Vector-US-4 | Vector | Past1   | 41569 | 24646379  | 67  |
| p38a-1      | p38a   | Past1   | 41569 | 24646379  | 43  |
| p38a-2      | p38a   | Past1   | 41569 | 24646379  | 68  |
| p38a-3      | p38a   | Past1   | 41569 | 24646379  | 105 |
| p38c-1      | p38c   | Past1   | 41569 | 24646381  | 50  |
| p38c-3      | p38c   | Past1   | 41569 | 24646379  | 57  |
| p38c-4      | p38c   | Past1   | 41569 | 24646379  | 68  |
| Vector-US-1 | Vector | Spindly | 33578 | 281364339 | 315 |
| Vector-US-2 | Vector | Spindly | 33578 | 281364339 | 412 |
| Vector-US-3 | Vector | Spindly | 33578 | 281364339 | 215 |
| Vector-US-4 | Vector | Spindly | 33578 | 281364339 | 354 |
| Vector-HS-1 | Vector | Spindly | 33578 | 281364339 | 575 |
| Vector-OS-1 | Vector | Spindly | 33578 | 281364339 | 539 |
| p38a-1      | p38a   | Spindly | 33578 | 281364339 | 149 |
| p38a-2      | p38a   | Spindly | 33578 | 281364339 | 421 |
| p38a-3      | p38a   | Spindly | 33578 | 281364339 | 158 |
| p38a-4      | p38a   | Spindly | 33578 | 281364339 | 302 |
| p38c-1      | p38c   | Spindly | 33578 | 281364339 | 432 |
| p38c-2      | p38c   | Spindly | 33578 | 281364339 | 381 |
| p38c-3      | p38c   | Spindly | 33578 | 281364339 | 99  |
| p38c-4      | p38c   | Spindly | 33578 | 281364339 | 411 |
| Vector-US-1 | Vector | AGO2    | 39683 | 24664664  | 314 |
| Vector-US-2 | Vector | AGO2    | 39683 | 24664664  | 395 |
| Vector-US-3 | Vector | AGO2    | 39683 | 24664664  | 526 |
| Vector-US-4 | Vector | AGO2    | 39683 | 24664664  | 212 |
| Vector-HS-1 | Vector | AGO2    | 39683 | 24664664  | 198 |
| Vector-OS-1 | Vector | AGO2    | 39683 | 24664664  | 221 |
| Mef2-US-1   | Mef2   | AGO2    | 39683 | 24664664  | 216 |
| Mef2-US-2   | Mef2   | AGO2    | 39683 | 24664664  | 348 |
| p38a-2      | p38a   | AGO2    | 39683 | 24664664  | 358 |
| p38a-3      | p38a   | AGO2    | 39683 | 24664664  | 94  |
| p38a-4      | p38a   | AGO2    | 39683 | 24664664  | 164 |
| p38b-1      | p38b   | AGO2    | 39683 | 24664664  | 34  |
| p38c-1      | p38c   | AGO2    | 39683 | 24664664  | 261 |
| p38c-2      | p38c   | AGO2    | 39683 | 24664664  | 330 |
| p38c-3      | p38c   | AGO2    | 39683 | 24664664  | 104 |

|             |        |        |       |          |     |
|-------------|--------|--------|-------|----------|-----|
| p38c-4      | p38c   | AGO2   | 39683 | 24664664 | 286 |
| Vector-US-1 | Vector | caz    | 32587 | 24642436 | 311 |
| Vector-US-2 | Vector | caz    | 32587 | 24642436 | 448 |
| Vector-US-3 | Vector | caz    | 32587 | 24642436 | 674 |
| Vector-US-4 | Vector | caz    | 32587 | 24642436 | 287 |
| Vector-HS-1 | Vector | caz    | 32587 | 24642436 | 414 |
| Vector-OS-1 | Vector | caz    | 32587 | 24642436 | 665 |
| Vector-OS-2 | Vector | caz    | 32587 | 24642436 | 181 |
| Vector-OS-3 | Vector | caz    | 32587 | 24642436 | 81  |
| Mef2-US-1   | Mef2   | caz    | 32587 | 24642436 | 279 |
| Mef2-US-2   | Mef2   | caz    | 32587 | 24642436 | 345 |
| p38a-1      | p38a   | caz    | 32587 | 24642436 | 257 |
| p38a-2      | p38a   | caz    | 32587 | 24642436 | 366 |
| p38a-3      | p38a   | caz    | 32587 | 24642436 | 397 |
| p38a-4      | p38a   | caz    | 32587 | 24642436 | 139 |
| p38b-1      | p38b   | caz    | 32587 | 24642436 | 158 |
| p38b-2      | p38b   | caz    | 32587 | 24642436 | 92  |
| p38b-3      | p38b   | caz    | 32587 | 24642436 | 222 |
| p38b-4      | p38b   | caz    | 32587 | 24642436 | 111 |
| p38c-1      | p38c   | caz    | 32587 | 24642436 | 443 |
| p38c-2      | p38c   | caz    | 32587 | 24642436 | 388 |
| p38c-3      | p38c   | caz    | 32587 | 24642436 | 345 |
| p38c-4      | p38c   | caz    | 32587 | 24642436 | 454 |
| Vector-US-1 | Vector | Pros45 | 33105 | 19920408 | 301 |
| Vector-US-2 | Vector | Pros45 | 33105 | 19920408 | 472 |
| Vector-US-3 | Vector | Pros45 | 33105 | 19920408 | 376 |
| Vector-US-4 | Vector | Pros45 | 33105 | 19920408 | 400 |
| Vector-HS-1 | Vector | Pros45 | 33105 | 19920408 | 97  |
| Vector-OS-1 | Vector | Pros45 | 33105 | 19920408 | 477 |
| Vector-OS-2 | Vector | Pros45 | 33105 | 19920408 | 133 |
| Mef2-US-1   | Mef2   | Pros45 | 33105 | 19920408 | 77  |
| p38a-1      | p38a   | Pros45 | 33105 | 19920408 | 248 |
| p38a-2      | p38a   | Pros45 | 33105 | 19920408 | 186 |
| p38a-3      | p38a   | Pros45 | 33105 | 19920408 | 210 |
| p38a-4      | p38a   | Pros45 | 33105 | 19920408 | 214 |
| p38b-1      | p38b   | Pros45 | 33105 | 19920408 | 75  |
| p38b-2      | p38b   | Pros45 | 33105 | 19920408 | 100 |
| p38b-3      | p38b   | Pros45 | 33105 | 19920408 | 72  |
| p38b-4      | p38b   | Pros45 | 33105 | 19920408 | 126 |
| p38c-1      | p38c   | Pros45 | 33105 | 19920408 | 429 |
| p38c-2      | p38c   | Pros45 | 33105 | 19920408 | 440 |
| p38c-3      | p38c   | Pros45 | 33105 | 19920408 | 482 |
| p38c-4      | p38c   | Pros45 | 33105 | 19920408 | 318 |
| Vector-US-1 | Vector | ade5   | 32228 | 18860083 | 300 |
| Vector-US-2 | Vector | ade5   | 32228 | 18860083 | 291 |
| Vector-US-3 | Vector | ade5   | 32228 | 18860083 | 315 |
| Vector-US-4 | Vector | ade5   | 32228 | 18860083 | 287 |

|             |        |            |       |          |     |
|-------------|--------|------------|-------|----------|-----|
| Vector-HS-1 | Vector | ade5       | 32228 | 18860083 | 112 |
| Vector-OS-1 | Vector | ade5       | 32228 | 18860083 | 106 |
| Mef2-US-1   | Mef2   | ade5       | 32228 | 18860083 | 163 |
| Mef2-US-2   | Mef2   | ade5       | 32228 | 18860083 | 134 |
| p38a-1      | p38a   | ade5       | 32228 | 18860083 | 203 |
| p38a-2      | p38a   | ade5       | 32228 | 18860083 | 246 |
| p38a-3      | p38a   | ade5       | 32228 | 18860083 | 207 |
| p38a-4      | p38a   | ade5       | 32228 | 18860083 | 373 |
| p38b-1      | p38b   | ade5       | 32228 | 18860083 | 121 |
| p38b-2      | p38b   | ade5       | 32228 | 18860083 | 294 |
| p38b-3      | p38b   | ade5       | 32228 | 18860083 | 89  |
| p38b-4      | p38b   | ade5       | 32228 | 18860083 | 249 |
| p38c-1      | p38c   | ade5       | 32228 | 18860083 | 317 |
| p38c-2      | p38c   | ade5       | 32228 | 18860083 | 280 |
| p38c-3      | p38c   | ade5       | 32228 | 18860083 | 118 |
| p38c-4      | p38c   | ade5       | 32228 | 18860083 | 344 |
| Vector-US-1 | Vector | 14-3-3zeta | 36059 | 24652322 | 289 |
| Vector-US-2 | Vector | 14-3-3zeta | 36059 | 24652322 | 286 |
| Vector-US-3 | Vector | 14-3-3zeta | 36059 | 24652322 | 325 |
| Vector-US-4 | Vector | 14-3-3zeta | 36059 | 24652322 | 390 |
| Vector-HS-1 | Vector | 14-3-3zeta | 36059 | 24652322 | 257 |
| Vector-OS-1 | Vector | 14-3-3zeta | 36059 | 24652322 | 374 |
| Mef2-US-1   | Mef2   | 14-3-3zeta | 36059 | 24652322 | 285 |
| Mef2-US-2   | Mef2   | 14-3-3zeta | 36059 | 24652322 | 348 |
| p38a-1      | p38a   | 14-3-3zeta | 36059 | 24652322 | 120 |
| p38a-2      | p38a   | 14-3-3zeta | 36059 | 24652322 | 325 |
| p38a-3      | p38a   | 14-3-3zeta | 36059 | 24652322 | 190 |
| p38a-4      | p38a   | 14-3-3zeta | 36059 | 24652326 | 172 |
| p38b-1      | p38b   | 14-3-3zeta | 36059 | 24652322 | 43  |
| p38b-2      | p38b   | 14-3-3zeta | 36059 | 24652322 | 106 |
| p38b-4      | p38b   | 14-3-3zeta | 36059 | 24652322 | 59  |
| p38c-1      | p38c   | 14-3-3zeta | 36059 | 24652322 | 281 |
| p38c-2      | p38c   | 14-3-3zeta | 36059 | 24652322 | 230 |
| p38c-3      | p38c   | 14-3-3zeta | 36059 | 24652322 | 169 |
| p38c-4      | p38c   | 14-3-3zeta | 36059 | 24652322 | 152 |
| Vector-US-1 | Vector | rin        | 47998 | 24646611 | 288 |
| Vector-US-2 | Vector | rin        | 47998 | 24646611 | 166 |
| Vector-US-3 | Vector | rin        | 47998 | 24646611 | 197 |
| Vector-US-4 | Vector | rin        | 47998 | 24646611 | 171 |
| Vector-HS-1 | Vector | rin        | 47998 | 24646611 | 171 |
| Vector-OS-1 | Vector | rin        | 47998 | 24646611 | 225 |
| Mef2-US-1   | Mef2   | rin        | 47998 | 24646611 | 72  |
| Mef2-US-2   | Mef2   | rin        | 47998 | 24646611 | 92  |
| p38a-1      | p38a   | rin        | 47998 | 24646611 | 168 |
| p38a-3      | p38a   | rin        | 47998 | 24646611 | 175 |
| p38a-4      | p38a   | rin        | 47998 | 24646611 | 66  |
| p38c-1      | p38c   | rin        | 47998 | 24646611 | 232 |

|             |        |          |       |          |     |
|-------------|--------|----------|-------|----------|-----|
| p38c-2      | p38c   | rin      | 47998 | 24646611 | 225 |
| p38c-3      | p38c   | rin      | 47998 | 24646611 | 187 |
| p38c-4      | p38c   | rin      | 47998 | 24646611 | 169 |
| Vector-US-1 | Vector | Pros26.4 | 42828 | 24649446 | 286 |
| Vector-US-2 | Vector | Pros26.4 | 42828 | 24649446 | 154 |
| Vector-US-3 | Vector | Pros26.4 | 42828 | 24649446 | 215 |
| Vector-US-4 | Vector | Pros26.4 | 42828 | 24649446 | 288 |
| Vector-HS-1 | Vector | Pros26.4 | 42828 | 24649446 | 199 |
| Vector-OS-1 | Vector | Pros26.4 | 42828 | 24649446 | 272 |
| Mef2-US-1   | Mef2   | Pros26.4 | 42828 | 24649446 | 78  |
| p38a-1      | p38a   | Pros26.4 | 42828 | 24649446 | 83  |
| p38a-2      | p38a   | Pros26.4 | 42828 | 24649446 | 243 |
| p38a-3      | p38a   | Pros26.4 | 42828 | 24649446 | 204 |
| p38a-4      | p38a   | Pros26.4 | 42828 | 24649446 | 189 |
| p38b-1      | p38b   | Pros26.4 | 42828 | 24649446 | 77  |
| p38b-2      | p38b   | Pros26.4 | 42828 | 24649446 | 81  |
| p38b-3      | p38b   | Pros26.4 | 42828 | 24649446 | 119 |
| p38b-4      | p38b   | Pros26.4 | 42828 | 24649446 | 303 |
| p38c-1      | p38c   | Pros26.4 | 42828 | 24649446 | 357 |
| p38c-2      | p38c   | Pros26.4 | 42828 | 24649446 | 373 |
| p38c-3      | p38c   | Pros26.4 | 42828 | 24649446 | 412 |
| p38c-4      | p38c   | Pros26.4 | 42828 | 24649446 | 351 |
| Vector-US-1 | Vector | Ack      | 38489 | 21356021 | 285 |
| Vector-US-2 | Vector | Ack      | 38489 | 21356021 | 437 |
| Vector-US-3 | Vector | Ack      | 38489 | 21356021 | 555 |
| Vector-US-4 | Vector | Ack      | 38489 | 21356021 | 309 |
| Vector-HS-1 | Vector | Ack      | 38489 | 21356021 | 374 |
| Vector-OS-1 | Vector | Ack      | 38489 | 21356021 | 362 |
| Vector-OS-2 | Vector | Ack      | 38489 | 21356021 | 126 |
| Vector-OS-3 | Vector | Ack      | 38489 | 21356021 | 57  |
| Mef2-US-1   | Mef2   | Ack      | 38489 | 21356021 | 189 |
| Mef2-US-2   | Mef2   | Ack      | 38489 | 21356021 | 87  |
| p38a-1      | p38a   | Ack      | 38489 | 21356021 | 210 |
| p38a-2      | p38a   | Ack      | 38489 | 21356021 | 403 |
| p38a-3      | p38a   | Ack      | 38489 | 21356021 | 450 |
| p38a-4      | p38a   | Ack      | 38489 | 21356021 | 366 |
| p38c-1      | p38c   | Ack      | 38489 | 21356021 | 334 |
| p38c-2      | p38c   | Ack      | 38489 | 21356021 | 258 |
| p38c-3      | p38c   | Ack      | 38489 | 21356021 | 222 |
| p38c-4      | p38c   | Ack      | 38489 | 21356021 | 323 |
| Vector-US-1 | Vector | CG10630  | 38620 | 24658349 | 281 |
| Vector-US-2 | Vector | CG10630  | 38620 | 24658349 | 239 |
| Vector-US-3 | Vector | CG10630  | 38620 | 24658349 | 353 |
| Vector-US-4 | Vector | CG10630  | 38620 | 24658349 | 334 |
| Vector-HS-1 | Vector | CG10630  | 38620 | 24658349 | 173 |
| Vector-OS-1 | Vector | CG10630  | 38620 | 24658349 | 445 |
| Vector-OS-2 | Vector | CG10630  | 38620 | 24658349 | 88  |

|             |        |         |       |           |     |
|-------------|--------|---------|-------|-----------|-----|
| Vector-OS-3 | Vector | CG10630 | 38620 | 24658349  | 51  |
| Mef2-US-1   | Mef2   | CG10630 | 38620 | 24658349  | 68  |
| Mef2-US-2   | Mef2   | CG10630 | 38620 | 24658349  | 252 |
| p38a-1      | p38a   | CG10630 | 38620 | 24658349  | 357 |
| p38a-2      | p38a   | CG10630 | 38620 | 24658349  | 196 |
| p38a-3      | p38a   | CG10630 | 38620 | 24658349  | 225 |
| p38a-4      | p38a   | CG10630 | 38620 | 24658349  | 202 |
| p38b-1      | p38b   | CG10630 | 38620 | 24658349  | 157 |
| p38b-2      | p38b   | CG10630 | 38620 | 24658349  | 139 |
| p38b-3      | p38b   | CG10630 | 38620 | 24658349  | 199 |
| p38b-4      | p38b   | CG10630 | 38620 | 24658349  | 159 |
| p38c-1      | p38c   | CG10630 | 38620 | 24658349  | 125 |
| p38c-2      | p38c   | CG10630 | 38620 | 24658349  | 154 |
| p38c-3      | p38c   | CG10630 | 38620 | 24658349  | 241 |
| p38c-4      | p38c   | CG10630 | 38620 | 24658349  | 363 |
| Vector-US-1 | Vector | eIF4G   | 43839 | 161076325 | 279 |
| Vector-US-2 | Vector | eIF4G   | 43839 | 161076325 | 132 |
| Vector-US-3 | Vector | eIF4G   | 43839 | 161076325 | 155 |
| Vector-HS-1 | Vector | eIF4G   | 43839 | 161076325 | 49  |
| Vector-OS-1 | Vector | eIF4G   | 43839 | 161076325 | 169 |
| Vector-OS-3 | Vector | eIF4G   | 43839 | 161076325 | 48  |
| Mef2-US-1   | Mef2   | eIF4G   | 43839 | 161076325 | 89  |
| Mef2-US-2   | Mef2   | eIF4G   | 43839 | 161076325 | 138 |
| p38a-1      | p38a   | eIF4G   | 43839 | 161076325 | 96  |
| p38a-2      | p38a   | eIF4G   | 43839 | 161076325 | 53  |
| p38a-3      | p38a   | eIF4G   | 43839 | 161076325 | 107 |
| p38a-4      | p38a   | eIF4G   | 43839 | 161076325 | 70  |
| p38b-1      | p38b   | eIF4G   | 43839 | 161076325 | 76  |
| p38b-2      | p38b   | eIF4G   | 43839 | 161076325 | 57  |
| p38b-3      | p38b   | eIF4G   | 43839 | 161076325 | 72  |
| p38b-4      | p38b   | eIF4G   | 43839 | 161076325 | 72  |
| p38c-1      | p38c   | eIF4G   | 43839 | 161076325 | 74  |
| p38c-2      | p38c   | eIF4G   | 43839 | 161076325 | 271 |
| p38c-3      | p38c   | eIF4G   | 43839 | 161076325 | 79  |
| Vector-US-1 | Vector | Droj2   | 41646 | 21357547  | 278 |
| Vector-US-2 | Vector | Droj2   | 41646 | 21357547  | 138 |
| Vector-US-3 | Vector | Droj2   | 41646 | 21357547  | 305 |
| Vector-US-4 | Vector | Droj2   | 41646 | 21357547  | 328 |
| Vector-HS-1 | Vector | Droj2   | 41646 | 21357547  | 93  |
| Vector-OS-1 | Vector | Droj2   | 41646 | 21357547  | 375 |
| Vector-OS-3 | Vector | Droj2   | 41646 | 21357547  | 50  |
| Mef2-US-1   | Mef2   | Droj2   | 41646 | 21357547  | 199 |
| Mef2-US-2   | Mef2   | Droj2   | 41646 | 21357547  | 163 |
| p38a-1      | p38a   | Droj2   | 41646 | 21357547  | 96  |
| p38a-2      | p38a   | Droj2   | 41646 | 21357547  | 242 |
| p38a-3      | p38a   | Droj2   | 41646 | 21357547  | 250 |
| p38a-4      | p38a   | Droj2   | 41646 | 21357547  | 144 |

|             |        |          |       |           |     |
|-------------|--------|----------|-------|-----------|-----|
| p38b-1      | p38b   | Droj2    | 41646 | 21357547  | 81  |
| p38b-2      | p38b   | Droj2    | 41646 | 21357547  | 163 |
| p38b-3      | p38b   | Droj2    | 41646 | 21357547  | 112 |
| p38b-4      | p38b   | Droj2    | 41646 | 21357547  | 116 |
| p38c-1      | p38c   | Droj2    | 41646 | 21357547  | 359 |
| p38c-2      | p38c   | Droj2    | 41646 | 21357547  | 523 |
| p38c-3      | p38c   | Droj2    | 41646 | 21357547  | 553 |
| p38c-4      | p38c   | Droj2    | 41646 | 21357547  | 603 |
| Vector-US-1 | Vector | ATPCL    | 36760 | 281363473 | 272 |
| Vector-US-2 | Vector | ATPCL    | 36760 | 281363473 | 527 |
| Vector-US-3 | Vector | ATPCL    | 36760 | 281363473 | 339 |
| Vector-US-4 | Vector | ATPCL    | 36760 | 281363473 | 411 |
| Vector-OS-1 | Vector | ATPCL    | 36760 | 281363473 | 211 |
| Mef2-US-1   | Mef2   | ATPCL    | 36760 | 281363473 | 163 |
| p38a-1      | p38a   | ATPCL    | 36760 | 281363473 | 211 |
| p38a-2      | p38a   | ATPCL    | 36760 | 281363473 | 399 |
| p38a-3      | p38a   | ATPCL    | 36760 | 281363473 | 138 |
| p38a-4      | p38a   | ATPCL    | 36760 | 281363473 | 305 |
| p38b-1      | p38b   | ATPCL    | 36760 | 281363473 | 38  |
| p38b-2      | p38b   | ATPCL    | 36760 | 281363473 | 129 |
| p38b-3      | p38b   | ATPCL    | 36760 | 281363473 | 166 |
| p38b-4      | p38b   | ATPCL    | 36760 | 281363473 | 217 |
| p38c-1      | p38c   | ATPCL    | 36760 | 281363473 | 176 |
| p38c-2      | p38c   | ATPCL    | 36760 | 281363473 | 400 |
| p38c-3      | p38c   | ATPCL    | 36760 | 281363473 | 467 |
| p38c-4      | p38c   | ATPCL    | 36760 | 281363473 | 175 |
| Vector-US-1 | Vector | CG13349  | 36545 | 19922206  | 271 |
| Vector-US-2 | Vector | CG13349  | 36545 | 19922206  | 367 |
| Vector-US-3 | Vector | CG13349  | 36545 | 19922206  | 294 |
| Vector-US-4 | Vector | CG13349  | 36545 | 19922206  | 186 |
| Vector-OS-1 | Vector | CG13349  | 36545 | 19922206  | 51  |
| Mef2-US-1   | Mef2   | CG13349  | 36545 | 19922206  | 103 |
| Mef2-US-2   | Mef2   | CG13349  | 36545 | 19922206  | 123 |
| p38a-1      | p38a   | CG13349  | 36545 | 19922206  | 33  |
| p38a-2      | p38a   | CG13349  | 36545 | 19922206  | 56  |
| p38a-3      | p38a   | CG13349  | 36545 | 19922206  | 174 |
| p38a-4      | p38a   | CG13349  | 36545 | 19922206  | 92  |
| p38b-1      | p38b   | CG13349  | 36545 | 19922206  | 87  |
| p38b-2      | p38b   | CG13349  | 36545 | 19922206  | 63  |
| p38b-4      | p38b   | CG13349  | 36545 | 19922206  | 88  |
| p38c-1      | p38c   | CG13349  | 36545 | 19922206  | 67  |
| p38c-2      | p38c   | CG13349  | 36545 | 19922206  | 178 |
| p38c-3      | p38c   | CG13349  | 36545 | 19922206  | 159 |
| Vector-US-1 | Vector | Ef1gamma | 44791 | 24651001  | 268 |
| Vector-US-2 | Vector | Ef1gamma | 44791 | 24651001  | 339 |
| Vector-US-3 | Vector | Ef1gamma | 44791 | 24651001  | 295 |
| Vector-US-4 | Vector | Ef1gamma | 44791 | 24651001  | 267 |

|             |        |          |       |          |     |
|-------------|--------|----------|-------|----------|-----|
| Vector-HS-1 | Vector | Ef1gamma | 44791 | 24651001 | 318 |
| Vector-OS-1 | Vector | Ef1gamma | 44791 | 24651001 | 497 |
| Vector-OS-3 | Vector | Ef1gamma | 44791 | 24651001 | 62  |
| Mef2-US-1   | Mef2   | Ef1gamma | 44791 | 24651001 | 181 |
| Mef2-US-2   | Mef2   | Ef1gamma | 44791 | 24651001 | 223 |
| p38a-1      | p38a   | Ef1gamma | 44791 | 24651001 | 169 |
| p38a-2      | p38a   | Ef1gamma | 44791 | 24651001 | 296 |
| p38a-3      | p38a   | Ef1gamma | 44791 | 24651001 | 334 |
| p38a-4      | p38a   | Ef1gamma | 44791 | 24651001 | 243 |
| p38b-1      | p38b   | Ef1gamma | 44791 | 24651001 | 67  |
| p38b-2      | p38b   | Ef1gamma | 44791 | 24651001 | 321 |
| p38b-3      | p38b   | Ef1gamma | 44791 | 24651001 | 382 |
| p38b-4      | p38b   | Ef1gamma | 44791 | 24651001 | 278 |
| p38c-1      | p38c   | Ef1gamma | 44791 | 24651001 | 505 |
| p38c-2      | p38c   | Ef1gamma | 44791 | 24651001 | 552 |
| p38c-3      | p38c   | Ef1gamma | 44791 | 24651001 | 555 |
| p38c-4      | p38c   | Ef1gamma | 44791 | 24651001 | 461 |
| Vector-US-1 | Vector | Aats-ala | 34156 | 24582809 | 268 |
| p38a-1      | p38a   | Aats-ala | 34156 | 24582809 | 39  |
| p38a-4      | p38a   | Aats-ala | 34156 | 24582809 | 47  |
| Vector-US-1 | Vector | PyK      | 42620 | 24648964 | 267 |
| Vector-US-2 | Vector | PyK      | 42620 | 24648964 | 157 |
| Vector-US-3 | Vector | PyK      | 42620 | 24648964 | 56  |
| Vector-US-4 | Vector | PyK      | 42620 | 24648964 | 130 |
| Vector-HS-1 | Vector | PyK      | 42620 | 24648964 | 65  |
| p38a-1      | p38a   | PyK      | 42620 | 24648964 | 43  |
| p38a-2      | p38a   | PyK      | 42620 | 24648964 | 46  |
| p38a-4      | p38a   | PyK      | 42620 | 24648964 | 110 |
| p38b-1      | p38b   | PyK      | 42620 | 24648964 | 51  |
| p38b-2      | p38b   | PyK      | 42620 | 24648964 | 48  |
| p38b-3      | p38b   | PyK      | 42620 | 24648964 | 49  |
| p38c-2      | p38c   | PyK      | 42620 | 24648964 | 84  |
| p38c-3      | p38c   | PyK      | 42620 | 24648964 | 129 |
| p38c-4      | p38c   | PyK      | 42620 | 24648964 | 48  |
| Vector-US-1 | Vector | CG1622   | 32282 | 24641727 | 263 |
| Vector-US-2 | Vector | CG1622   | 32282 | 24641727 | 156 |
| Vector-US-3 | Vector | CG1622   | 32282 | 24641727 | 222 |
| Vector-US-4 | Vector | CG1622   | 32282 | 24641727 | 153 |
| Vector-OS-1 | Vector | CG1622   | 32282 | 24641727 | 293 |
| Mef2-US-2   | Mef2   | CG1622   | 32282 | 24641727 | 81  |
| p38a-2      | p38a   | CG1622   | 32282 | 24641727 | 243 |
| p38a-3      | p38a   | CG1622   | 32282 | 24641727 | 248 |
| p38a-4      | p38a   | CG1622   | 32282 | 24641727 | 169 |
| p38b-1      | p38b   | CG1622   | 32282 | 24641727 | 51  |
| p38b-3      | p38b   | CG1622   | 32282 | 24641727 | 61  |
| p38b-4      | p38b   | CG1622   | 32282 | 24641727 | 103 |
| p38c-1      | p38c   | CG1622   | 32282 | 24641727 | 79  |



|             |        |        |       |          |     |
|-------------|--------|--------|-------|----------|-----|
| p38c-2      | p38c   | CG1622 | 32282 | 24641727 | 143 |
| p38c-3      | p38c   | CG1622 | 32282 | 24641727 | 179 |
| p38c-4      | p38c   | CG1622 | 32282 | 24641727 | 89  |
| Vector-US-1 | Vector | Rpt1   | 35701 | 17137738 | 263 |
| Vector-US-2 | Vector | Rpt1   | 35701 | 17137738 | 298 |
| Vector-US-3 | Vector | Rpt1   | 35701 | 17137738 | 357 |
| Vector-US-4 | Vector | Rpt1   | 35701 | 17137738 | 307 |
| Vector-HS-1 | Vector | Rpt1   | 35701 | 17137738 | 224 |
| Vector-OS-1 | Vector | Rpt1   | 35701 | 17137738 | 394 |
| Vector-OS-2 | Vector | Rpt1   | 35701 | 17137738 | 47  |
| Vector-OS-3 | Vector | Rpt1   | 35701 | 17137738 | 56  |
| Mef2-US-2   | Mef2   | Rpt1   | 35701 | 17137738 | 75  |
| p38a-1      | p38a   | Rpt1   | 35701 | 17137738 | 95  |
| p38a-2      | p38a   | Rpt1   | 35701 | 17137738 | 285 |
| p38a-3      | p38a   | Rpt1   | 35701 | 17137738 | 410 |
| p38a-4      | p38a   | Rpt1   | 35701 | 17137738 | 144 |
| p38b-2      | p38b   | Rpt1   | 35701 | 17137738 | 84  |
| p38b-3      | p38b   | Rpt1   | 35701 | 17137738 | 51  |
| p38b-4      | p38b   | Rpt1   | 35701 | 17137738 | 218 |
| p38c-1      | p38c   | Rpt1   | 35701 | 17137738 | 248 |
| p38c-2      | p38c   | Rpt1   | 35701 | 17137738 | 269 |
| p38c-3      | p38c   | Rpt1   | 35701 | 17137738 | 284 |
| p38c-4      | p38c   | Rpt1   | 35701 | 17137738 | 374 |
| Vector-US-1 | Vector | La     | 35305 | 17136954 | 260 |
| Vector-US-2 | Vector | La     | 35305 | 17136954 | 90  |
| Vector-US-3 | Vector | La     | 35305 | 17136954 | 140 |
| Vector-OS-1 | Vector | La     | 35305 | 17136954 | 94  |
| Vector-OS-3 | Vector | La     | 35305 | 17136954 | 49  |
| p38a-1      | p38a   | La     | 35305 | 17136954 | 38  |
| p38a-2      | p38a   | La     | 35305 | 17136954 | 81  |
| p38a-3      | p38a   | La     | 35305 | 17136954 | 108 |
| p38b-1      | p38b   | La     | 35305 | 17136954 | 81  |
| p38b-4      | p38b   | La     | 35305 | 17136954 | 79  |
| p38c-1      | p38c   | La     | 35305 | 17136954 | 65  |
| p38c-3      | p38c   | La     | 35305 | 17136954 | 88  |
| p38c-4      | p38c   | La     | 35305 | 17136954 | 117 |
| Vector-US-1 | Vector | Rpn7   | 42641 | 21355773 | 257 |
| Vector-US-2 | Vector | Rpn7   | 42641 | 21355773 | 257 |
| Vector-US-3 | Vector | Rpn7   | 42641 | 21355773 | 271 |
| Vector-US-4 | Vector | Rpn7   | 42641 | 21355773 | 159 |
| Vector-HS-1 | Vector | Rpn7   | 42641 | 21355773 | 172 |
| Vector-OS-1 | Vector | Rpn7   | 42641 | 21355773 | 226 |
| p38a-1      | p38a   | Rpn7   | 42641 | 21355773 | 47  |
| p38a-2      | p38a   | Rpn7   | 42641 | 21355773 | 191 |
| p38a-3      | p38a   | Rpn7   | 42641 | 21355773 | 112 |
| p38a-4      | p38a   | Rpn7   | 42641 | 21355773 | 281 |
| p38b-1      | p38b   | Rpn7   | 42641 | 21355773 | 50  |

|             |        |          |       |          |     |
|-------------|--------|----------|-------|----------|-----|
| p38b-2      | p38b   | Rpn7     | 42641 | 21355773 | 116 |
| p38c-1      | p38c   | Rpn7     | 42641 | 21355773 | 154 |
| p38c-2      | p38c   | Rpn7     | 42641 | 21355773 | 248 |
| p38c-3      | p38c   | Rpn7     | 42641 | 21355773 | 221 |
| p38c-4      | p38c   | Rpn7     | 42641 | 21355773 | 279 |
| Vector-US-1 | Vector | Act5C    | 31521 | 17530805 | 252 |
| Vector-HS-1 | Vector | Act5C    | 31521 | 17530805 | 293 |
| p38a-1      | p38a   | Act5C    | 31521 | 17530805 | 279 |
| p38b-2      | p38b   | Act5C    | 31521 | 17530805 | 67  |
| p38c-2      | p38c   | Act5C    | 31521 | 17530805 | 290 |
| Vector-US-1 | Vector | Nopp140  | 40433 | 45551819 | 251 |
| Vector-US-2 | Vector | Nopp140  | 40433 | 45551819 | 172 |
| Vector-US-3 | Vector | Nopp140  | 40433 | 45551819 | 221 |
| Vector-US-4 | Vector | Nopp140  | 40433 | 45551819 | 69  |
| Vector-HS-1 | Vector | Nopp140  | 40433 | 45551819 | 151 |
| Vector-OS-1 | Vector | Nopp140  | 40433 | 45551819 | 446 |
| Vector-OS-2 | Vector | Nopp140  | 40433 | 45551819 | 56  |
| Mef2-US-1   | Mef2   | Nopp140  | 40433 | 45551819 | 143 |
| Mef2-US-2   | Mef2   | Nopp140  | 40433 | 45551819 | 165 |
| p38a-2      | p38a   | Nopp140  | 40433 | 45551819 | 59  |
| p38a-3      | p38a   | Nopp140  | 40433 | 45551819 | 141 |
| p38b-1      | p38b   | Nopp140  | 40433 | 45551819 | 67  |
| p38b-3      | p38b   | Nopp140  | 40433 | 45551819 | 171 |
| p38b-4      | p38b   | Nopp140  | 40433 | 45551819 | 142 |
| p38c-1      | p38c   | Nopp140  | 40433 | 45551819 | 219 |
| p38c-2      | p38c   | Nopp140  | 40433 | 45551819 | 183 |
| p38c-3      | p38c   | Nopp140  | 40433 | 45551819 | 187 |
| p38c-4      | p38c   | Nopp140  | 40433 | 45551819 | 205 |
| Vector-US-1 | Vector | beta'Cop | 45757 | 24584107 | 246 |
| Vector-US-2 | Vector | beta'Cop | 45757 | 24584107 | 352 |
| Vector-US-3 | Vector | beta'Cop | 45757 | 24584107 | 376 |
| Vector-US-4 | Vector | beta'Cop | 45757 | 24584107 | 265 |
| Vector-HS-1 | Vector | beta'Cop | 45757 | 24584107 | 143 |
| Vector-OS-1 | Vector | beta'Cop | 45757 | 24584107 | 248 |
| Vector-OS-2 | Vector | beta'Cop | 45757 | 24584107 | 85  |
| p38a-1      | p38a   | beta'Cop | 45757 | 24584107 | 71  |
| p38a-2      | p38a   | beta'Cop | 45757 | 24584107 | 180 |
| p38a-3      | p38a   | beta'Cop | 45757 | 24584107 | 153 |
| p38a-4      | p38a   | beta'Cop | 45757 | 24584107 | 130 |
| p38b-1      | p38b   | beta'Cop | 45757 | 24584107 | 50  |
| p38b-2      | p38b   | beta'Cop | 45757 | 24584107 | 74  |
| p38b-3      | p38b   | beta'Cop | 45757 | 24584107 | 186 |
| p38b-4      | p38b   | beta'Cop | 45757 | 24584107 | 142 |
| p38c-1      | p38c   | beta'Cop | 45757 | 24584107 | 198 |
| p38c-2      | p38c   | beta'Cop | 45757 | 24584107 | 212 |
| p38c-3      | p38c   | beta'Cop | 45757 | 24584107 | 276 |
| p38c-4      | p38c   | beta'Cop | 45757 | 24584107 | 238 |

|             |        |         |       |          |     |
|-------------|--------|---------|-------|----------|-----|
| Vector-US-1 | Vector | CG9894  | 33462 | 19920594 | 243 |
| Vector-US-3 | Vector | CG9894  | 33462 | 19920594 | 102 |
| Vector-OS-1 | Vector | CG9894  | 33462 | 19920594 | 147 |
| Mef2-US-2   | Mef2   | CG9894  | 33462 | 19920594 | 115 |
| p38a-2      | p38a   | CG9894  | 33462 | 19920594 | 66  |
| p38b-4      | p38b   | CG9894  | 33462 | 19920594 | 68  |
| p38c-1      | p38c   | CG9894  | 33462 | 19920594 | 105 |
| p38c-2      | p38c   | CG9894  | 33462 | 19920594 | 115 |
| Vector-US-1 | Vector | Rpn6    | 36638 | 17137740 | 238 |
| Vector-US-2 | Vector | Rpn6    | 36638 | 17137740 | 223 |
| Vector-US-3 | Vector | Rpn6    | 36638 | 17137740 | 183 |
| Vector-US-4 | Vector | Rpn6    | 36638 | 17137740 | 147 |
| Vector-HS-1 | Vector | Rpn6    | 36638 | 17137740 | 56  |
| Vector-OS-1 | Vector | Rpn6    | 36638 | 17137740 | 269 |
| p38a-1      | p38a   | Rpn6    | 36638 | 17137740 | 77  |
| p38a-2      | p38a   | Rpn6    | 36638 | 17137740 | 67  |
| p38a-3      | p38a   | Rpn6    | 36638 | 17137740 | 117 |
| p38a-4      | p38a   | Rpn6    | 36638 | 17137740 | 143 |
| p38c-1      | p38c   | Rpn6    | 36638 | 17137740 | 125 |
| p38c-2      | p38c   | Rpn6    | 36638 | 17137740 | 321 |
| p38c-3      | p38c   | Rpn6    | 36638 | 17137740 | 156 |
| p38c-4      | p38c   | Rpn6    | 36638 | 17137740 | 181 |
| Vector-US-1 | Vector | betaCop | 32820 | 17647193 | 234 |
| Vector-US-2 | Vector | betaCop | 32820 | 17647193 | 281 |
| Vector-US-3 | Vector | betaCop | 32820 | 17647193 | 286 |
| Vector-US-4 | Vector | betaCop | 32820 | 17647193 | 347 |
| Vector-HS-1 | Vector | betaCop | 32820 | 17647193 | 210 |
| Vector-OS-1 | Vector | betaCop | 32820 | 17647193 | 352 |
| Vector-OS-2 | Vector | betaCop | 32820 | 17647193 | 98  |
| Vector-OS-3 | Vector | betaCop | 32820 | 17647193 | 52  |
| Mef2-US-2   | Mef2   | betaCop | 32820 | 17647193 | 69  |
| p38a-1      | p38a   | betaCop | 32820 | 17647193 | 195 |
| p38a-2      | p38a   | betaCop | 32820 | 17647193 | 202 |
| p38a-3      | p38a   | betaCop | 32820 | 17647193 | 84  |
| p38a-4      | p38a   | betaCop | 32820 | 17647193 | 231 |
| p38b-2      | p38b   | betaCop | 32820 | 17647193 | 85  |
| p38b-3      | p38b   | betaCop | 32820 | 17647193 | 51  |
| p38b-4      | p38b   | betaCop | 32820 | 17647193 | 131 |
| p38c-1      | p38c   | betaCop | 32820 | 17647193 | 120 |
| p38c-2      | p38c   | betaCop | 32820 | 17647193 | 231 |
| p38c-3      | p38c   | betaCop | 32820 | 17647193 | 272 |
| p38c-4      | p38c   | betaCop | 32820 | 17647193 | 254 |
| Vector-US-1 | Vector | Hsc70Cb | 39557 | 21357475 | 234 |
| Vector-US-2 | Vector | Hsc70Cb | 39557 | 21357475 | 372 |
| Vector-US-3 | Vector | Hsc70Cb | 39557 | 21357475 | 240 |
| Vector-US-4 | Vector | Hsc70Cb | 39557 | 21357475 | 150 |
| Vector-HS-1 | Vector | Hsc70Cb | 39557 | 21357475 | 54  |

|             |        |         |       |          |     |
|-------------|--------|---------|-------|----------|-----|
| Vector-OS-1 | Vector | Hsc70Cb | 39557 | 21357475 | 171 |
| Vector-OS-3 | Vector | Hsc70Cb | 39557 | 21357475 | 53  |
| Mef2-US-1   | Mef2   | Hsc70Cb | 39557 | 21357475 | 231 |
| Mef2-US-2   | Mef2   | Hsc70Cb | 39557 | 21357475 | 481 |
| p38a-1      | p38a   | Hsc70Cb | 39557 | 21357475 | 103 |
| p38a-2      | p38a   | Hsc70Cb | 39557 | 21357475 | 139 |
| p38a-3      | p38a   | Hsc70Cb | 39557 | 21357475 | 177 |
| p38a-4      | p38a   | Hsc70Cb | 39557 | 21357475 | 175 |
| p38c-1      | p38c   | Hsc70Cb | 39557 | 21357475 | 70  |
| p38c-2      | p38c   | Hsc70Cb | 39557 | 21357475 | 51  |
| p38c-3      | p38c   | Hsc70Cb | 39557 | 21357475 | 78  |
| p38c-4      | p38c   | Hsc70Cb | 39557 | 21357475 | 165 |
| Vector-US-1 | Vector | Sir2    | 34708 | 17137536 | 232 |
| Vector-US-2 | Vector | Sir2    | 34708 | 17137536 | 541 |
| Vector-US-3 | Vector | Sir2    | 34708 | 17137536 | 356 |
| Vector-US-4 | Vector | Sir2    | 34708 | 17137536 | 215 |
| Vector-HS-1 | Vector | Sir2    | 34708 | 17137536 | 65  |
| Vector-OS-1 | Vector | Sir2    | 34708 | 17137536 | 527 |
| Mef2-US-1   | Mef2   | Sir2    | 34708 | 17137536 | 159 |
| p38a-1      | p38a   | Sir2    | 34708 | 17137536 | 35  |
| p38a-2      | p38a   | Sir2    | 34708 | 17137536 | 326 |
| p38a-3      | p38a   | Sir2    | 34708 | 17137536 | 272 |
| p38a-4      | p38a   | Sir2    | 34708 | 17137536 | 265 |
| p38c-1      | p38c   | Sir2    | 34708 | 17137536 | 100 |
| p38c-2      | p38c   | Sir2    | 34708 | 17137536 | 245 |
| p38c-3      | p38c   | Sir2    | 34708 | 17137536 | 347 |
| p38c-4      | p38c   | Sir2    | 34708 | 17137536 | 361 |
| Vector-US-1 | Vector | fax     | 39826 | 28574889 | 231 |
| Vector-US-2 | Vector | fax     | 39826 | 28574889 | 202 |
| Vector-US-3 | Vector | fax     | 39826 | 28574889 | 235 |
| Vector-US-4 | Vector | fax     | 39826 | 28574889 | 145 |
| Vector-HS-1 | Vector | fax     | 39826 | 28574889 | 80  |
| Vector-OS-1 | Vector | fax     | 39826 | 28574889 | 275 |
| p38a-1      | p38a   | fax     | 39826 | 28574891 | 45  |
| p38a-2      | p38a   | fax     | 39826 | 28574889 | 130 |
| p38a-3      | p38a   | fax     | 39826 | 28574889 | 186 |
| p38a-4      | p38a   | fax     | 39826 | 28574889 | 218 |
| p38b-1      | p38b   | fax     | 39826 | 28574889 | 154 |
| p38b-2      | p38b   | fax     | 39826 | 28574889 | 173 |
| p38b-3      | p38b   | fax     | 39826 | 28574889 | 129 |
| p38c-1      | p38c   | fax     | 39826 | 28574889 | 78  |
| p38c-2      | p38c   | fax     | 39826 | 28574889 | 223 |
| p38c-3      | p38c   | fax     | 39826 | 28574889 | 220 |
| p38c-4      | p38c   | fax     | 39826 | 28574889 | 191 |
| Vector-US-1 | Vector | Chd64   | 38490 | 21355917 | 231 |
| Vector-US-2 | Vector | Chd64   | 38490 | 21355917 | 287 |
| Vector-US-3 | Vector | Chd64   | 38490 | 21355917 | 349 |

|             |        |          |       |          |     |
|-------------|--------|----------|-------|----------|-----|
| Vector-US-4 | Vector | Chd64    | 38490 | 21355917 | 233 |
| Vector-HS-1 | Vector | Chd64    | 38490 | 21355917 | 297 |
| Vector-OS-1 | Vector | Chd64    | 38490 | 21355917 | 390 |
| Vector-OS-2 | Vector | Chd64    | 38490 | 21355917 | 174 |
| Vector-OS-3 | Vector | Chd64    | 38490 | 21355917 | 66  |
| Mef2-US-1   | Mef2   | Chd64    | 38490 | 21355917 | 74  |
| Mef2-US-2   | Mef2   | Chd64    | 38490 | 21355917 | 148 |
| p38a-1      | p38a   | Chd64    | 38490 | 21355917 | 121 |
| p38a-2      | p38a   | Chd64    | 38490 | 21355917 | 221 |
| p38a-3      | p38a   | Chd64    | 38490 | 21355917 | 210 |
| p38a-4      | p38a   | Chd64    | 38490 | 21355917 | 230 |
| p38b-1      | p38b   | Chd64    | 38490 | 21355917 | 74  |
| p38c-1      | p38c   | Chd64    | 38490 | 21355917 | 311 |
| p38c-2      | p38c   | Chd64    | 38490 | 21355917 | 252 |
| p38c-3      | p38c   | Chd64    | 38490 | 21355917 | 254 |
| p38c-4      | p38c   | Chd64    | 38490 | 21355917 | 307 |
| Vector-US-1 | Vector | gammaCop | 43717 | 17864148 | 231 |
| Vector-US-2 | Vector | gammaCop | 43717 | 17864148 | 95  |
| Vector-US-3 | Vector | gammaCop | 43717 | 17864148 | 286 |
| Vector-US-4 | Vector | gammaCop | 43717 | 17864148 | 212 |
| Vector-HS-1 | Vector | gammaCop | 43717 | 17864148 | 46  |
| Vector-OS-1 | Vector | gammaCop | 43717 | 17864148 | 73  |
| Vector-OS-2 | Vector | gammaCop | 43717 | 17864148 | 63  |
| Vector-OS-3 | Vector | gammaCop | 43717 | 17864148 | 107 |
| Mef2-US-1   | Mef2   | gammaCop | 43717 | 17864148 | 89  |
| p38a-1      | p38a   | gammaCop | 43717 | 17864148 | 142 |
| p38a-2      | p38a   | gammaCop | 43717 | 17864148 | 158 |
| p38a-3      | p38a   | gammaCop | 43717 | 17864148 | 108 |
| p38a-4      | p38a   | gammaCop | 43717 | 17864148 | 249 |
| p38b-1      | p38b   | gammaCop | 43717 | 17864148 | 64  |
| p38b-2      | p38b   | gammaCop | 43717 | 17864148 | 181 |
| p38b-3      | p38b   | gammaCop | 43717 | 17864148 | 195 |
| p38b-4      | p38b   | gammaCop | 43717 | 17864148 | 203 |
| p38c-1      | p38c   | gammaCop | 43717 | 17864148 | 228 |
| p38c-2      | p38c   | gammaCop | 43717 | 17864148 | 179 |
| p38c-3      | p38c   | gammaCop | 43717 | 17864148 | 189 |
| p38c-4      | p38c   | gammaCop | 43717 | 17864148 | 288 |
| Vector-US-1 | Vector | Ssrp     | 37767 | 24762396 | 229 |
| Vector-US-2 | Vector | Ssrp     | 37767 | 24762396 | 504 |
| Vector-US-3 | Vector | Ssrp     | 37767 | 24762396 | 553 |
| Vector-US-4 | Vector | Ssrp     | 37767 | 24762396 | 547 |
| Vector-HS-1 | Vector | Ssrp     | 37767 | 24762396 | 296 |
| Vector-OS-1 | Vector | Ssrp     | 37767 | 24762396 | 380 |
| Mef2-US-1   | Mef2   | Ssrp     | 37767 | 24762396 | 284 |
| p38a-1      | p38a   | Ssrp     | 37767 | 24762396 | 434 |
| p38a-2      | p38a   | Ssrp     | 37767 | 24762396 | 514 |
| p38a-3      | p38a   | Ssrp     | 37767 | 24762396 | 383 |

|             |        |         |       |           |     |
|-------------|--------|---------|-------|-----------|-----|
| p38a-4      | p38a   | Ssrp    | 37767 | 24762396  | 266 |
| p38c-1      | p38c   | Ssrp    | 37767 | 24762396  | 367 |
| p38c-2      | p38c   | Ssrp    | 37767 | 24762396  | 297 |
| p38c-3      | p38c   | Ssrp    | 37767 | 24762396  | 257 |
| p38c-4      | p38c   | Ssrp    | 37767 | 24762396  | 348 |
| Vector-US-1 | Vector | tral    | 39430 | 45550607  | 229 |
| Vector-US-2 | Vector | tral    | 39430 | 45550607  | 307 |
| Vector-US-3 | Vector | tral    | 39430 | 45550607  | 209 |
| Vector-US-4 | Vector | tral    | 39430 | 45550607  | 184 |
| Vector-HS-1 | Vector | tral    | 39430 | 45550607  | 214 |
| Vector-OS-1 | Vector | tral    | 39430 | 45550607  | 438 |
| Mef2-US-1   | Mef2   | tral    | 39430 | 45550607  | 119 |
| Mef2-US-2   | Mef2   | tral    | 39430 | 45550607  | 136 |
| p38a-1      | p38a   | tral    | 39430 | 45550607  | 126 |
| p38a-2      | p38a   | tral    | 39430 | 45550607  | 277 |
| p38a-3      | p38a   | tral    | 39430 | 45550607  | 230 |
| p38a-4      | p38a   | tral    | 39430 | 45550607  | 269 |
| p38b-1      | p38b   | tral    | 39430 | 45550607  | 145 |
| p38b-4      | p38b   | tral    | 39430 | 45550607  | 61  |
| p38c-1      | p38c   | tral    | 39430 | 45550607  | 288 |
| p38c-2      | p38c   | tral    | 39430 | 45550607  | 302 |
| p38c-3      | p38c   | tral    | 39430 | 45550607  | 191 |
| p38c-4      | p38c   | tral    | 39430 | 45550607  | 235 |
| Vector-US-1 | Vector | Ald     | 43183 | 24650278  | 225 |
| Vector-US-2 | Vector | Ald     | 43183 | 24650278  | 207 |
| Vector-US-3 | Vector | Ald     | 43183 | 24650278  | 126 |
| Vector-US-4 | Vector | Ald     | 43183 | 24650278  | 426 |
| Vector-HS-1 | Vector | Ald     | 43183 | 24650278  | 123 |
| Vector-OS-1 | Vector | Ald     | 43183 | 24650278  | 152 |
| Mef2-US-1   | Mef2   | Ald     | 43183 | 24650278  | 64  |
| Mef2-US-2   | Mef2   | Ald     | 43183 | 24650278  | 73  |
| p38a-1      | p38a   | Ald     | 43183 | 24650278  | 100 |
| p38a-2      | p38a   | Ald     | 43183 | 24650278  | 194 |
| p38a-3      | p38a   | Ald     | 43183 | 24650278  | 252 |
| p38a-4      | p38a   | Ald     | 43183 | 24650278  | 143 |
| p38b-1      | p38b   | Ald     | 43183 | 24650278  | 59  |
| p38b-2      | p38b   | Ald     | 43183 | 24650278  | 59  |
| p38b-3      | p38b   | Ald     | 43183 | 24650278  | 88  |
| p38b-4      | p38b   | Ald     | 43183 | 24650278  | 72  |
| p38c-1      | p38c   | Ald     | 43183 | 24650278  | 157 |
| p38c-2      | p38c   | Ald     | 43183 | 24650278  | 141 |
| p38c-3      | p38c   | Ald     | 43183 | 24650278  | 156 |
| p38c-4      | p38c   | Ald     | 43183 | 24650278  | 80  |
| Vector-US-1 | Vector | CG1416  | 35426 | 24585720  | 220 |
| p38a-1      | p38a   | CG1416  | 35426 | 24585720  | 31  |
| Vector-US-1 | Vector | CG15602 | 32533 | 161077838 | 219 |
| Vector-US-2 | Vector | CG15602 | 32533 | 161077838 | 350 |

|             |        |          |       |           |     |
|-------------|--------|----------|-------|-----------|-----|
| Vector-US-3 | Vector | CG15602  | 32533 | 161077838 | 480 |
| Vector-US-4 | Vector | CG15602  | 32533 | 161077838 | 377 |
| Vector-HS-1 | Vector | CG15602  | 32533 | 161077838 | 375 |
| Vector-OS-1 | Vector | CG15602  | 32533 | 161077838 | 442 |
| Vector-OS-2 | Vector | CG15602  | 32533 | 161077838 | 162 |
| Vector-OS-3 | Vector | CG15602  | 32533 | 161077838 | 144 |
| Mef2-US-1   | Mef2   | CG15602  | 32533 | 161077838 | 193 |
| Mef2-US-2   | Mef2   | CG15602  | 32533 | 161077838 | 62  |
| p38a-1      | p38a   | CG15602  | 32533 | 161077838 | 288 |
| p38a-2      | p38a   | CG15602  | 32533 | 161077838 | 280 |
| p38a-3      | p38a   | CG15602  | 32533 | 161077838 | 318 |
| p38a-4      | p38a   | CG15602  | 32533 | 161077838 | 328 |
| p38c-1      | p38c   | CG15602  | 32533 | 161077838 | 327 |
| p38c-2      | p38c   | CG15602  | 32533 | 161077838 | 419 |
| p38c-3      | p38c   | CG15602  | 32533 | 161077838 | 412 |
| p38c-4      | p38c   | CG15602  | 32533 | 161077838 | 320 |
| Vector-US-1 | Vector | Aats-asn | 35194 | 19921528  | 213 |
| p38a-2      | p38a   | Aats-asn | 35194 | 19921528  | 38  |
| Vector-US-1 | Vector | scf      | 38145 | 17137602  | 207 |
| Vector-US-2 | Vector | scf      | 38145 | 17137602  | 540 |
| Vector-US-3 | Vector | scf      | 38145 | 17137602  | 449 |
| Vector-US-4 | Vector | scf      | 38145 | 17137602  | 199 |
| Vector-OS-1 | Vector | scf      | 38145 | 17137602  | 409 |
| Mef2-US-1   | Mef2   | scf      | 38145 | 17137602  | 124 |
| p38a-1      | p38a   | scf      | 38145 | 17137602  | 338 |
| p38a-2      | p38a   | scf      | 38145 | 17137602  | 185 |
| p38a-3      | p38a   | scf      | 38145 | 17137604  | 232 |
| p38a-4      | p38a   | scf      | 38145 | 17137602  | 149 |
| p38c-1      | p38c   | scf      | 38145 | 17137604  | 196 |
| p38c-3      | p38c   | scf      | 38145 | 17137602  | 62  |
| p38c-4      | p38c   | scf      | 38145 | 17137602  | 231 |
| Vector-US-1 | Vector | eIF3-S8  | 37005 | 19922464  | 207 |
| Vector-US-2 | Vector | eIF3-S8  | 37005 | 19922464  | 133 |
| Vector-US-3 | Vector | eIF3-S8  | 37005 | 19922464  | 205 |
| Vector-US-4 | Vector | eIF3-S8  | 37005 | 19922464  | 298 |
| Vector-HS-1 | Vector | eIF3-S8  | 37005 | 19922464  | 153 |
| Vector-OS-1 | Vector | eIF3-S8  | 37005 | 19922464  | 229 |
| Mef2-US-1   | Mef2   | eIF3-S8  | 37005 | 19922464  | 48  |
| p38a-2      | p38a   | eIF3-S8  | 37005 | 19922464  | 214 |
| p38a-3      | p38a   | eIF3-S8  | 37005 | 19922464  | 58  |
| p38a-4      | p38a   | eIF3-S8  | 37005 | 19922464  | 191 |
| p38b-4      | p38b   | eIF3-S8  | 37005 | 19922464  | 100 |
| p38c-2      | p38c   | eIF3-S8  | 37005 | 19922464  | 138 |
| p38c-3      | p38c   | eIF3-S8  | 37005 | 19922464  | 58  |
| p38c-4      | p38c   | eIF3-S8  | 37005 | 19922464  | 291 |
| Vector-US-1 | Vector | Rpn2     | 43449 | 24650984  | 202 |
| Vector-US-2 | Vector | Rpn2     | 43449 | 24650984  | 152 |

|             |        |        |       |          |     |
|-------------|--------|--------|-------|----------|-----|
| Vector-US-3 | Vector | Rpn2   | 43449 | 24650984 | 197 |
| Vector-US-4 | Vector | Rpn2   | 43449 | 24650984 | 171 |
| Vector-HS-1 | Vector | Rpn2   | 43449 | 24650984 | 106 |
| Vector-OS-1 | Vector | Rpn2   | 43449 | 24650984 | 240 |
| Vector-OS-2 | Vector | Rpn2   | 43449 | 24650984 | 45  |
| Mef2-US-2   | Mef2   | Rpn2   | 43449 | 24650984 | 115 |
| p38a-2      | p38a   | Rpn2   | 43449 | 24650984 | 112 |
| p38a-3      | p38a   | Rpn2   | 43449 | 24650984 | 342 |
| p38a-4      | p38a   | Rpn2   | 43449 | 24650984 | 54  |
| p38b-1      | p38b   | Rpn2   | 43449 | 24650984 | 41  |
| p38b-3      | p38b   | Rpn2   | 43449 | 24650984 | 77  |
| p38c-1      | p38c   | Rpn2   | 43449 | 24650984 | 82  |
| p38c-2      | p38c   | Rpn2   | 43449 | 24650984 | 85  |
| p38c-3      | p38c   | Rpn2   | 43449 | 24650984 | 417 |
| p38c-4      | p38c   | Rpn2   | 43449 | 24650984 | 257 |
| Vector-US-1 | Vector | CG3800 | 37646 | 24658883 | 201 |
| Vector-US-1 | Vector | Tbp-1  | 42805 | 17738151 | 197 |
| Vector-US-2 | Vector | Tbp-1  | 42805 | 17738151 | 535 |
| Vector-US-3 | Vector | Tbp-1  | 42805 | 17738151 | 367 |
| Vector-US-4 | Vector | Tbp-1  | 42805 | 17738151 | 307 |
| Vector-HS-1 | Vector | Tbp-1  | 42805 | 17738151 | 115 |
| Vector-OS-1 | Vector | Tbp-1  | 42805 | 17738151 | 707 |
| Vector-OS-2 | Vector | Tbp-1  | 42805 | 17738151 | 143 |
| Vector-OS-3 | Vector | Tbp-1  | 42805 | 17738151 | 141 |
| Mef2-US-1   | Mef2   | Tbp-1  | 42805 | 17738151 | 144 |
| p38a-1      | p38a   | Tbp-1  | 42805 | 17738151 | 225 |
| p38a-2      | p38a   | Tbp-1  | 42805 | 17738151 | 328 |
| p38a-3      | p38a   | Tbp-1  | 42805 | 17738151 | 93  |
| p38a-4      | p38a   | Tbp-1  | 42805 | 17738151 | 311 |
| p38b-1      | p38b   | Tbp-1  | 42805 | 17738151 | 68  |
| p38b-4      | p38b   | Tbp-1  | 42805 | 17738151 | 124 |
| p38c-1      | p38c   | Tbp-1  | 42805 | 17738151 | 546 |
| p38c-2      | p38c   | Tbp-1  | 42805 | 17738151 | 482 |
| p38c-3      | p38c   | Tbp-1  | 42805 | 17738151 | 480 |
| p38c-4      | p38c   | Tbp-1  | 42805 | 17738151 | 700 |
| Vector-US-1 | Vector | capt   | 45233 | 85724874 | 196 |
| Vector-US-2 | Vector | capt   | 45233 | 85724872 | 131 |
| Vector-US-3 | Vector | capt   | 45233 | 85724874 | 228 |
| Vector-US-4 | Vector | capt   | 45233 | 85724874 | 282 |
| Vector-HS-1 | Vector | capt   | 45233 | 85724872 | 66  |
| Vector-OS-1 | Vector | capt   | 45233 | 85724872 | 67  |
| p38a-2      | p38a   | capt   | 45233 | 85724874 | 173 |
| p38a-3      | p38a   | capt   | 45233 | 85724872 | 120 |
| p38a-4      | p38a   | capt   | 45233 | 85724872 | 166 |
| p38b-1      | p38b   | capt   | 45233 | 85724872 | 42  |
| p38b-2      | p38b   | capt   | 45233 | 85724872 | 74  |
| p38c-1      | p38c   | capt   | 45233 | 85724872 | 86  |



|             |        |         |      |       |          |      |
|-------------|--------|---------|------|-------|----------|------|
| p38c-2      | p38c   | capt    |      | 45233 | 85724872 | 106  |
| p38c-4      | p38c   | capt    |      | 45233 | 85724874 | 113  |
| Vector-US-1 | Vector | CG18811 |      | 59172 | 24666371 | 194  |
| Vector-US-2 | Vector | CG18811 |      | 59172 | 24666371 | 459  |
| Vector-US-3 | Vector | CG18811 |      | 59172 | 24666371 | 416  |
| Vector-US-4 | Vector | CG18811 |      | 59172 | 24666371 | 139  |
| Vector-HS-1 | Vector | CG18811 |      | 59172 | 24666371 | 201  |
| Vector-OS-1 | Vector | CG18811 |      | 59172 | 24666371 | 435  |
| Mef2-US-1   | Mef2   | CG18811 |      | 59172 | 24666371 | 67   |
| Mef2-US-2   | Mef2   | CG18811 |      | 59172 | 24666371 | 74   |
| p38a-1      | p38a   | CG18811 |      | 59172 | 24666371 | 95   |
| p38a-2      | p38a   | CG18811 |      | 59172 | 24666371 | 74   |
| p38a-3      | p38a   | CG18811 |      | 59172 | 24666371 | 218  |
| p38b-1      | p38b   | CG18811 |      | 59172 | 24666371 | 137  |
| p38c-1      | p38c   | CG18811 |      | 59172 | 24666371 | 110  |
| p38c-2      | p38c   | CG18811 |      | 59172 | 24666371 | 55   |
| p38c-3      | p38c   | CG18811 |      | 59172 | 24666371 | 108  |
| p38c-4      | p38c   | CG18811 |      | 59172 | 24666371 | 247  |
| Vector-US-1 | Vector | p38b    | p38b |       | 17137550 | 192  |
| Vector-US-2 | Vector | p38b    | p38b |       | 17137550 | 62   |
| Mef2-US-1   | Mef2   | p38b    | p38b |       | 17137550 | 275  |
| p38b-1      | p38b   | p38b    | p38b |       | 17137550 | 891  |
| p38b-2      | p38b   | p38b    | p38b |       | 17137550 | 952  |
| p38b-3      | p38b   | p38b    | p38b |       | 17137550 | 1225 |
| p38b-4      | p38b   | p38b    | p38b |       | 17137550 | 1021 |
| p38c-1      | p38c   | p38b    | p38b |       | 17137550 | 94   |
| Vector-US-1 | Vector | growl   |      | 40559 | 21355167 | 190  |
| Vector-US-2 | Vector | growl   |      | 40559 | 21355167 | 319  |
| Vector-US-3 | Vector | growl   |      | 40559 | 21355167 | 427  |
| Vector-US-4 | Vector | growl   |      | 40559 | 21355167 | 163  |
| Vector-HS-1 | Vector | growl   |      | 40559 | 21355167 | 159  |
| Vector-OS-1 | Vector | growl   |      | 40559 | 21355167 | 365  |
| Mef2-US-2   | Mef2   | growl   |      | 40559 | 21355167 | 192  |
| p38a-1      | p38a   | growl   |      | 40559 | 21355167 | 119  |
| p38a-2      | p38a   | growl   |      | 40559 | 21355167 | 232  |
| p38a-3      | p38a   | growl   |      | 40559 | 21355167 | 191  |
| p38b-4      | p38b   | growl   |      | 40559 | 21355167 | 105  |
| p38c-1      | p38c   | growl   |      | 40559 | 21355167 | 318  |
| p38c-2      | p38c   | growl   |      | 40559 | 21355167 | 167  |
| p38c-3      | p38c   | growl   |      | 40559 | 21355167 | 278  |
| p38c-4      | p38c   | growl   |      | 40559 | 21355167 | 183  |
| Vector-US-1 | Vector | sec31   |      | 35877 | 20129799 | 190  |
| Vector-US-2 | Vector | sec31   |      | 35877 | 20129799 | 185  |
| Vector-US-3 | Vector | sec31   |      | 35877 | 20129799 | 232  |
| Vector-US-4 | Vector | sec31   |      | 35877 | 20129799 | 117  |
| Vector-HS-1 | Vector | sec31   |      | 35877 | 20129799 | 138  |
| Vector-OS-1 | Vector | sec31   |      | 35877 | 20129799 | 194  |

|             |        |         |       |          |     |
|-------------|--------|---------|-------|----------|-----|
| Vector-OS-3 | Vector | sec31   | 35877 | 20129799 | 98  |
| p38a-1      | p38a   | sec31   | 35877 | 20129799 | 80  |
| p38a-2      | p38a   | sec31   | 35877 | 20129799 | 98  |
| p38a-3      | p38a   | sec31   | 35877 | 20129799 | 176 |
| p38a-4      | p38a   | sec31   | 35877 | 20129799 | 157 |
| p38c-1      | p38c   | sec31   | 35877 | 20129799 | 51  |
| p38c-2      | p38c   | sec31   | 35877 | 20129799 | 293 |
| p38c-3      | p38c   | sec31   | 35877 | 20129799 | 302 |
| p38c-4      | p38c   | sec31   | 35877 | 20129799 | 399 |
| Vector-US-1 | Vector | CG8507  | 41205 | 21356069 | 185 |
| Vector-US-2 | Vector | CG8507  | 41205 | 21356069 | 240 |
| Vector-US-3 | Vector | CG8507  | 41205 | 21356069 | 239 |
| Vector-HS-1 | Vector | CG8507  | 41205 | 21356069 | 87  |
| Vector-OS-1 | Vector | CG8507  | 41205 | 21356069 | 263 |
| Mef2-US-1   | Mef2   | CG8507  | 41205 | 21356069 | 134 |
| p38a-1      | p38a   | CG8507  | 41205 | 21356069 | 147 |
| p38a-2      | p38a   | CG8507  | 41205 | 21356069 | 31  |
| p38a-3      | p38a   | CG8507  | 41205 | 21356069 | 63  |
| p38c-1      | p38c   | CG8507  | 41205 | 21356069 | 155 |
| p38c-2      | p38c   | CG8507  | 41205 | 21356069 | 163 |
| p38c-4      | p38c   | CG8507  | 41205 | 21356069 | 155 |
| Vector-US-1 | Vector | CG10306 | 37475 | 19922704 | 185 |
| Vector-US-2 | Vector | CG10306 | 37475 | 19922704 | 290 |
| Vector-US-3 | Vector | CG10306 | 37475 | 19922704 | 168 |
| Vector-US-4 | Vector | CG10306 | 37475 | 19922704 | 255 |
| Vector-HS-1 | Vector | CG10306 | 37475 | 19922704 | 46  |
| Vector-OS-1 | Vector | CG10306 | 37475 | 19922704 | 118 |
| Vector-OS-3 | Vector | CG10306 | 37475 | 19922704 | 71  |
| Mef2-US-1   | Mef2   | CG10306 | 37475 | 19922704 | 70  |
| p38a-1      | p38a   | CG10306 | 37475 | 19922704 | 122 |
| p38a-2      | p38a   | CG10306 | 37475 | 19922704 | 203 |
| p38a-3      | p38a   | CG10306 | 37475 | 19922704 | 85  |
| p38a-4      | p38a   | CG10306 | 37475 | 19922704 | 183 |
| p38b-1      | p38b   | CG10306 | 37475 | 19922704 | 47  |
| p38b-3      | p38b   | CG10306 | 37475 | 19922704 | 181 |
| p38b-4      | p38b   | CG10306 | 37475 | 19922704 | 159 |
| p38c-1      | p38c   | CG10306 | 37475 | 19922704 | 183 |
| p38c-2      | p38c   | CG10306 | 37475 | 19922704 | 217 |
| p38c-3      | p38c   | CG10306 | 37475 | 19922704 | 346 |
| p38c-4      | p38c   | CG10306 | 37475 | 19922704 | 279 |
| Vector-US-1 | Vector | CG1637  | 32019 | 20129007 | 184 |
| Vector-US-2 | Vector | CG1637  | 32019 | 20129007 | 232 |
| Vector-US-3 | Vector | CG1637  | 32019 | 20129007 | 263 |
| Vector-US-4 | Vector | CG1637  | 32019 | 20129007 | 216 |
| Vector-OS-1 | Vector | CG1637  | 32019 | 20129007 | 135 |
| Vector-OS-2 | Vector | CG1637  | 32019 | 20129007 | 53  |
| Vector-OS-3 | Vector | CG1637  | 32019 | 20129007 | 50  |

|             |        |         |       |          |     |
|-------------|--------|---------|-------|----------|-----|
| Mef2-US-1   | Mef2   | CG1637  | 32019 | 20129007 | 98  |
| Mef2-US-2   | Mef2   | CG1637  | 32019 | 20129007 | 60  |
| p38a-2      | p38a   | CG1637  | 32019 | 20129007 | 194 |
| p38a-3      | p38a   | CG1637  | 32019 | 20129007 | 124 |
| p38a-4      | p38a   | CG1637  | 32019 | 20129007 | 168 |
| p38c-2      | p38c   | CG1637  | 32019 | 20129007 | 47  |
| p38c-3      | p38c   | CG1637  | 32019 | 20129007 | 143 |
| p38c-4      | p38c   | CG1637  | 32019 | 20129007 | 142 |
| Vector-US-1 | Vector | sqd     | 41666 | 24646605 | 181 |
| Vector-US-2 | Vector | sqd     | 41666 | 24646605 | 209 |
| Vector-US-3 | Vector | sqd     | 41666 | 24646605 | 181 |
| Vector-US-4 | Vector | sqd     | 41666 | 24646605 | 232 |
| Vector-HS-1 | Vector | sqd     | 41666 | 24646605 | 152 |
| Vector-OS-1 | Vector | sqd     | 41666 | 24646605 | 233 |
| p38a-1      | p38a   | sqd     | 41666 | 24646605 | 80  |
| p38a-2      | p38a   | sqd     | 41666 | 24646605 | 95  |
| p38a-3      | p38a   | sqd     | 41666 | 24646605 | 111 |
| p38a-4      | p38a   | sqd     | 41666 | 24646605 | 156 |
| p38b-3      | p38b   | sqd     | 41666 | 24646605 | 84  |
| p38c-1      | p38c   | sqd     | 41666 | 24646605 | 113 |
| p38c-2      | p38c   | sqd     | 41666 | 24646605 | 97  |
| p38c-3      | p38c   | sqd     | 41666 | 24646605 | 92  |
| p38c-4      | p38c   | sqd     | 41666 | 24646605 | 150 |
| Vector-US-1 | Vector | Act88F  | 41885 | 17975545 | 172 |
| Vector-US-2 | Vector | Act88F  | 41885 | 17975545 | 315 |
| Vector-US-4 | Vector | Act88F  | 41885 | 17975545 | 281 |
| Vector-OS-1 | Vector | Act88F  | 41885 | 17975545 | 290 |
| p38a-1      | p38a   | Act88F  | 41885 | 17975545 | 180 |
| p38a-2      | p38a   | Act88F  | 41885 | 17975545 | 267 |
| p38a-3      | p38a   | Act88F  | 41885 | 17975545 | 302 |
| p38a-4      | p38a   | Act88F  | 41885 | 17975545 | 162 |
| p38c-1      | p38c   | Act88F  | 41885 | 17975545 | 307 |
| p38c-2      | p38c   | Act88F  | 41885 | 17975545 | 259 |
| p38c-3      | p38c   | Act88F  | 41885 | 17975545 | 293 |
| p38c-4      | p38c   | Act88F  | 41885 | 17975545 | 288 |
| Vector-US-1 | Vector | Jupiter | 41392 | 24645995 | 171 |
| Vector-US-2 | Vector | Jupiter | 41392 | 24645995 | 227 |
| Vector-US-3 | Vector | Jupiter | 41392 | 24645995 | 170 |
| Vector-US-4 | Vector | Jupiter | 41392 | 24645995 | 107 |
| Vector-HS-1 | Vector | Jupiter | 41392 | 24645993 | 297 |
| Vector-OS-1 | Vector | Jupiter | 41392 | 24645995 | 284 |
| Mef2-US-1   | Mef2   | Jupiter | 41392 | 24645993 | 174 |
| Mef2-US-2   | Mef2   | Jupiter | 41392 | 24645993 | 300 |
| p38a-1      | p38a   | Jupiter | 41392 | 24645993 | 69  |
| p38a-2      | p38a   | Jupiter | 41392 | 24645993 | 182 |
| p38a-3      | p38a   | Jupiter | 41392 | 24645993 | 78  |
| p38c-2      | p38c   | Jupiter | 41392 | 24645993 | 141 |

|             |        |             |       |          |     |
|-------------|--------|-------------|-------|----------|-----|
| Vector-US-1 | Vector | scu         | 32789 | 17737361 | 167 |
| Vector-US-3 | Vector | scu         | 32789 | 17737361 | 75  |
| p38a-1      | p38a   | scu         | 32789 | 17737361 | 54  |
| p38a-2      | p38a   | scu         | 32789 | 17737361 | 87  |
| p38a-3      | p38a   | scu         | 32789 | 17737361 | 64  |
| p38a-4      | p38a   | scu         | 32789 | 17737361 | 58  |
| p38c-4      | p38c   | scu         | 32789 | 17737361 | 103 |
| Vector-US-1 | Vector | Usp7        | 32169 | 24641480 | 167 |
| Vector-US-3 | Vector | Usp7        | 32169 | 24641480 | 188 |
| Vector-US-4 | Vector | Usp7        | 32169 | 24641480 | 61  |
| p38a-3      | p38a   | Usp7        | 32169 | 24641480 | 63  |
| p38c-1      | p38c   | Usp7        | 32169 | 24641480 | 108 |
| p38c-3      | p38c   | Usp7        | 32169 | 24641480 | 154 |
| p38c-4      | p38c   | Usp7        | 32169 | 24641480 | 54  |
| Vector-US-1 | Vector | Uba1        | 35998 | 28573937 | 164 |
| Vector-US-3 | Vector | Uba1        | 35998 | 28573937 | 54  |
| Vector-US-4 | Vector | Uba1        | 35998 | 28573937 | 60  |
| Vector-US-1 | Vector | Aats-glupro | 42834 | 24649466 | 163 |
| Vector-US-2 | Vector | Aats-glupro | 42834 | 24649468 | 203 |
| Vector-US-3 | Vector | Aats-glupro | 42834 | 24649466 | 205 |
| Vector-US-4 | Vector | Aats-glupro | 42834 | 24649466 | 187 |
| Vector-HS-1 | Vector | Aats-glupro | 42834 | 24649466 | 526 |
| Vector-OS-1 | Vector | Aats-glupro | 42834 | 24649466 | 594 |
| Vector-OS-2 | Vector | Aats-glupro | 42834 | 24649468 | 90  |
| Vector-OS-3 | Vector | Aats-glupro | 42834 | 24649466 | 49  |
| p38a-2      | p38a   | Aats-glupro | 42834 | 24649466 | 258 |
| p38a-3      | p38a   | Aats-glupro | 42834 | 24649466 | 194 |
| p38a-4      | p38a   | Aats-glupro | 42834 | 24649466 | 139 |
| p38b-3      | p38b   | Aats-glupro | 42834 | 24649468 | 70  |
| p38b-4      | p38b   | Aats-glupro | 42834 | 24649468 | 77  |
| p38c-1      | p38c   | Aats-glupro | 42834 | 24649466 | 131 |
| p38c-2      | p38c   | Aats-glupro | 42834 | 24649466 | 216 |
| p38c-3      | p38c   | Aats-glupro | 42834 | 24649466 | 228 |
| p38c-4      | p38c   | Aats-glupro | 42834 | 24649466 | 158 |
| Vector-US-1 | Vector | CG15432     | 33647 | 24581646 | 163 |
| Vector-US-2 | Vector | CG15432     | 33647 | 24581646 | 170 |
| Vector-US-3 | Vector | CG15432     | 33647 | 24581646 | 158 |
| Vector-US-4 | Vector | CG15432     | 33647 | 24581646 | 163 |
| Vector-HS-1 | Vector | CG15432     | 33647 | 24581646 | 144 |
| Vector-OS-1 | Vector | CG15432     | 33647 | 24581646 | 155 |
| p38a-1      | p38a   | CG15432     | 33647 | 24581646 | 167 |
| p38a-2      | p38a   | CG15432     | 33647 | 24581646 | 151 |
| p38a-3      | p38a   | CG15432     | 33647 | 24581646 | 151 |
| p38a-4      | p38a   | CG15432     | 33647 | 24581646 | 164 |
| p38b-1      | p38b   | CG15432     | 33647 | 24581646 | 130 |
| p38b-2      | p38b   | CG15432     | 33647 | 24581646 | 59  |
| p38b-4      | p38b   | CG15432     | 33647 | 24581646 | 130 |

|             |        |         |         |          |     |
|-------------|--------|---------|---------|----------|-----|
| p38c-1      | p38c   | CG15432 | 33647   | 24581646 | 160 |
| p38c-2      | p38c   | CG15432 | 33647   | 24581646 | 176 |
| p38c-3      | p38c   | CG15432 | 33647   | 24581646 | 159 |
| p38c-4      | p38c   | CG15432 | 33647   | 24581646 | 138 |
| Vector-US-1 | Vector | Srp68   | 39028   | 21355591 | 163 |
| Vector-US-3 | Vector | Srp68   | 39028   | 21355591 | 58  |
| Vector-US-4 | Vector | Srp68   | 39028   | 21355591 | 204 |
| Vector-OS-1 | Vector | Srp68   | 39028   | 21355591 | 132 |
| Vector-OS-2 | Vector | Srp68   | 39028   | 21355591 | 54  |
| p38a-3      | p38a   | Srp68   | 39028   | 21355591 | 79  |
| p38a-4      | p38a   | Srp68   | 39028   | 21355591 | 47  |
| p38b-2      | p38b   | Srp68   | 39028   | 21355591 | 83  |
| p38c-1      | p38c   | Srp68   | 39028   | 21355591 | 71  |
| p38c-2      | p38c   | Srp68   | 39028   | 21355591 | 89  |
| p38c-3      | p38c   | Srp68   | 39028   | 21355591 | 124 |
| p38c-4      | p38c   | Srp68   | 39028   | 21355591 | 91  |
| Vector-US-1 | Vector | Tctp    | 41341   | 24645861 | 161 |
| Vector-US-2 | Vector | Tctp    | 41341   | 24645861 | 47  |
| Vector-US-3 | Vector | Tctp    | 41341   | 24645861 | 134 |
| Vector-HS-1 | Vector | Tctp    | 41341   | 24645861 | 60  |
| Vector-OS-1 | Vector | Tctp    | 41341   | 24645861 | 54  |
| p38a-2      | p38a   | Tctp    | 41341   | 24645861 | 122 |
| Vector-US-1 | Vector | Caf1    | 41836   | 17933648 | 161 |
| Vector-US-2 | Vector | Caf1    | 41836   | 17933648 | 162 |
| Vector-US-3 | Vector | Caf1    | 41836   | 17933648 | 78  |
| Vector-US-4 | Vector | Caf1    | 41836   | 17933648 | 150 |
| Vector-OS-1 | Vector | Caf1    | 41836   | 17933648 | 164 |
| p38a-1      | p38a   | Caf1    | 41836   | 17933648 | 84  |
| p38a-2      | p38a   | Caf1    | 41836   | 17933648 | 72  |
| p38c-2      | p38c   | Caf1    | 41836   | 17933648 | 65  |
| p38c-3      | p38c   | Caf1    | 41836   | 17933648 | 106 |
| p38c-4      | p38c   | Caf1    | 41836   | 17933648 | 150 |
| Vector-US-1 | Vector | eIF-4a  | 33835   | 17136248 | 160 |
| Vector-US-3 | Vector | eIF-4a  | 33835   | 17136248 | 108 |
| Vector-US-4 | Vector | eIF-4a  | 33835   | 17136248 | 64  |
| Vector-HS-1 | Vector | eIF-4a  | 33835   | 17136248 | 49  |
| Vector-OS-1 | Vector | eIF-4a  | 33835   | 17136248 | 126 |
| p38a-2      | p38a   | eIF-4a  | 33835   | 17136248 | 73  |
| p38a-3      | p38a   | eIF-4a  | 33835   | 17136248 | 46  |
| p38c-1      | p38c   | eIF-4a  | 33835   | 17136248 | 55  |
| p38c-3      | p38c   | eIF-4a  | 33835   | 17136248 | 49  |
| Vector-US-1 | Vector | CG33332 | 2768669 | 45553373 | 158 |
| Vector-US-1 | Vector | CG5491  | 43227   | 21357045 | 156 |
| Vector-US-2 | Vector | CG5491  | 43227   | 21357045 | 78  |
| Vector-OS-1 | Vector | CG5491  | 43227   | 21357045 | 105 |
| p38c-1      | p38c   | CG5491  | 43227   | 21357045 | 63  |
| p38c-4      | p38c   | CG5491  | 43227   | 21357045 | 59  |

|             |        |           |       |          |     |
|-------------|--------|-----------|-------|----------|-----|
| Vector-US-1 | Vector | Karybeta3 | 40581 | 17737759 | 156 |
| Vector-US-2 | Vector | Karybeta3 | 40581 | 17737759 | 74  |
| Vector-US-3 | Vector | Karybeta3 | 40581 | 17737759 | 120 |
| Vector-US-4 | Vector | Karybeta3 | 40581 | 17737759 | 54  |
| Vector-OS-1 | Vector | Karybeta3 | 40581 | 17737759 | 163 |
| p38a-1      | p38a   | Karybeta3 | 40581 | 17737759 | 55  |
| p38a-3      | p38a   | Karybeta3 | 40581 | 17737759 | 47  |
| p38a-4      | p38a   | Karybeta3 | 40581 | 17737759 | 59  |
| p38b-1      | p38b   | Karybeta3 | 40581 | 17737759 | 53  |
| p38b-3      | p38b   | Karybeta3 | 40581 | 17737759 | 59  |
| p38c-1      | p38c   | Karybeta3 | 40581 | 17737759 | 60  |
| p38c-3      | p38c   | Karybeta3 | 40581 | 17737759 | 89  |
| p38c-4      | p38c   | Karybeta3 | 40581 | 17737759 | 115 |
| Vector-US-1 | Vector | Eb1       | 35584 | 19921706 | 153 |
| Vector-US-2 | Vector | Eb1       | 35584 | 19921706 | 127 |
| Vector-US-3 | Vector | Eb1       | 35584 | 19921706 | 64  |
| Vector-US-4 | Vector | Eb1       | 35584 | 19921706 | 80  |
| Vector-OS-1 | Vector | Eb1       | 35584 | 19921706 | 109 |
| p38a-2      | p38a   | Eb1       | 35584 | 19921706 | 37  |
| p38a-4      | p38a   | Eb1       | 35584 | 19921706 | 85  |
| p38c-2      | p38c   | Eb1       | 35584 | 19921706 | 49  |
| p38c-3      | p38c   | Eb1       | 35584 | 19921706 | 115 |
| Vector-US-1 | Vector | CG9577    | 33016 | 19920382 | 153 |
| Vector-US-2 | Vector | CG9577    | 33016 | 19920382 | 84  |
| Mef2-US-1   | Mef2   | CG9577    | 33016 | 19920382 | 99  |
| p38c-1      | p38c   | CG9577    | 33016 | 19920382 | 100 |
| p38c-2      | p38c   | CG9577    | 33016 | 19920382 | 68  |
| p38c-4      | p38c   | CG9577    | 33016 | 19920382 | 101 |
| Vector-US-1 | Vector | T-cp1     | 42649 | 24649027 | 151 |
| Vector-US-2 | Vector | T-cp1     | 42649 | 24649027 | 497 |
| Vector-US-3 | Vector | T-cp1     | 42649 | 24649027 | 457 |
| Vector-US-4 | Vector | T-cp1     | 42649 | 24649027 | 349 |
| Vector-HS-1 | Vector | T-cp1     | 42649 | 24649027 | 135 |
| Vector-OS-1 | Vector | T-cp1     | 42649 | 24649027 | 198 |
| Vector-OS-2 | Vector | T-cp1     | 42649 | 24649027 | 53  |
| Vector-OS-3 | Vector | T-cp1     | 42649 | 24649027 | 152 |
| p38a-1      | p38a   | T-cp1     | 42649 | 24649027 | 157 |
| p38a-2      | p38a   | T-cp1     | 42649 | 24649027 | 335 |
| p38a-3      | p38a   | T-cp1     | 42649 | 24649027 | 551 |
| p38a-4      | p38a   | T-cp1     | 42649 | 24649027 | 369 |
| p38b-1      | p38b   | T-cp1     | 42649 | 24649027 | 234 |
| p38b-2      | p38b   | T-cp1     | 42649 | 24649027 | 143 |
| p38b-3      | p38b   | T-cp1     | 42649 | 24649027 | 391 |
| p38b-4      | p38b   | T-cp1     | 42649 | 24649027 | 281 |
| p38c-1      | p38c   | T-cp1     | 42649 | 24649027 | 394 |
| p38c-2      | p38c   | T-cp1     | 42649 | 24649027 | 390 |
| p38c-3      | p38c   | T-cp1     | 42649 | 24649027 | 438 |

|             |        |        |       |          |     |
|-------------|--------|--------|-------|----------|-----|
| p38c-4      | p38c   | T-cp1  | 42649 | 24649027 | 374 |
| Vector-US-1 | Vector | Nap1   | 37798 | 17137142 | 151 |
| Vector-US-2 | Vector | Nap1   | 37798 | 17137142 | 141 |
| Vector-US-3 | Vector | Nap1   | 37798 | 17137142 | 71  |
| Vector-US-4 | Vector | Nap1   | 37798 | 17137142 | 151 |
| Vector-HS-1 | Vector | Nap1   | 37798 | 17137142 | 47  |
| Vector-OS-1 | Vector | Nap1   | 37798 | 17137142 | 139 |
| Mef2-US-1   | Mef2   | Nap1   | 37798 | 17137142 | 87  |
| p38a-1      | p38a   | Nap1   | 37798 | 17137142 | 53  |
| p38a-3      | p38a   | Nap1   | 37798 | 17137142 | 63  |
| p38b-2      | p38b   | Nap1   | 37798 | 17137142 | 101 |
| p38c-1      | p38c   | Nap1   | 37798 | 17137142 | 107 |
| p38c-2      | p38c   | Nap1   | 37798 | 17137142 | 82  |
| p38c-3      | p38c   | Nap1   | 37798 | 17137142 | 77  |
| p38c-4      | p38c   | Nap1   | 37798 | 17137142 | 121 |
| Vector-US-1 | Vector | Hrb87F | 48535 | 17136624 | 151 |
| Vector-US-2 | Vector | Hrb87F | 48535 | 17136624 | 243 |
| Vector-US-3 | Vector | Hrb87F | 48535 | 17136624 | 259 |
| Vector-US-4 | Vector | Hrb87F | 48535 | 17136624 | 97  |
| Vector-HS-1 | Vector | Hrb87F | 48535 | 17136624 | 153 |
| Vector-OS-1 | Vector | Hrb87F | 48535 | 17136624 | 281 |
| Vector-OS-2 | Vector | Hrb87F | 48535 | 17136622 | 48  |
| Vector-OS-3 | Vector | Hrb87F | 48535 | 17136622 | 68  |
| Mef2-US-1   | Mef2   | Hrb87F | 48535 | 17136624 | 100 |
| Mef2-US-2   | Mef2   | Hrb87F | 48535 | 17136624 | 63  |
| p38a-1      | p38a   | Hrb87F | 48535 | 17136622 | 100 |
| p38a-2      | p38a   | Hrb87F | 48535 | 17136624 | 171 |
| p38a-3      | p38a   | Hrb87F | 48535 | 17136624 | 96  |
| p38b-1      | p38b   | Hrb87F | 48535 | 17136622 | 64  |
| p38b-2      | p38b   | Hrb87F | 48535 | 17136624 | 63  |
| p38b-3      | p38b   | Hrb87F | 48535 | 17136624 | 164 |
| p38b-4      | p38b   | Hrb87F | 48535 | 17136624 | 172 |
| p38c-1      | p38c   | Hrb87F | 48535 | 17136624 | 234 |
| p38c-2      | p38c   | Hrb87F | 48535 | 17136624 | 281 |
| p38c-3      | p38c   | Hrb87F | 48535 | 17136624 | 180 |
| p38c-4      | p38c   | Hrb87F | 48535 | 17136624 | 199 |
| Vector-US-1 | Vector | Gapdh2 | 32545 | 17933600 | 150 |
| Vector-US-4 | Vector | Gapdh2 | 32545 | 17933600 | 49  |
| Vector-HS-1 | Vector | Gapdh2 | 32545 | 17933600 | 65  |
| Vector-OS-1 | Vector | Gapdh2 | 32545 | 17933600 | 61  |
| p38a-2      | p38a   | Gapdh2 | 32545 | 17933600 | 81  |
| p38b-3      | p38b   | Gapdh2 | 32545 | 17933600 | 68  |
| p38b-4      | p38b   | Gapdh2 | 32545 | 17933600 | 67  |
| p38c-1      | p38c   | Gapdh2 | 32545 | 17933600 | 77  |
| p38c-2      | p38c   | Gapdh2 | 32545 | 17933600 | 84  |
| Vector-US-1 | Vector | TfIIIS | 34883 | 17136888 | 149 |
| Vector-US-2 | Vector | TfIIIS | 34883 | 17136888 | 163 |

|             |        |         |       |          |     |
|-------------|--------|---------|-------|----------|-----|
| Vector-US-3 | Vector | TfIIIS  | 34883 | 17136888 | 201 |
| Vector-OS-1 | Vector | TfIIIS  | 34883 | 17136888 | 87  |
| Mef2-US-2   | Mef2   | TfIIIS  | 34883 | 17136888 | 110 |
| p38a-3      | p38a   | TfIIIS  | 34883 | 17136888 | 50  |
| p38b-1      | p38b   | TfIIIS  | 34883 | 17136888 | 45  |
| p38c-3      | p38c   | TfIIIS  | 34883 | 17136888 | 72  |
| p38c-4      | p38c   | TfIIIS  | 34883 | 17136888 | 52  |
| Vector-US-1 | Vector | CG10324 | 42028 | 24647508 | 147 |
| Vector-OS-1 | Vector | CG10324 | 42028 | 24647508 | 65  |
| Vector-US-1 | Vector | B52     | 41670 | 28571689 | 147 |
| Vector-US-2 | Vector | B52     | 41670 | 28571689 | 75  |
| Vector-US-3 | Vector | B52     | 41670 | 28571689 | 147 |
| Vector-US-4 | Vector | B52     | 41670 | 28571689 | 97  |
| Vector-HS-1 | Vector | B52     | 41670 | 28571689 | 130 |
| Vector-OS-1 | Vector | B52     | 41670 | 28571689 | 239 |
| p38a-1      | p38a   | B52     | 41670 | 28571689 | 90  |
| p38a-3      | p38a   | B52     | 41670 | 28571689 | 96  |
| p38a-4      | p38a   | B52     | 41670 | 28571689 | 96  |
| p38c-1      | p38c   | B52     | 41670 | 28571689 | 55  |
| p38c-2      | p38c   | B52     | 41670 | 28571689 | 54  |
| p38c-4      | p38c   | B52     | 41670 | 28571689 | 92  |
| Vector-US-1 | Vector | Fmr1    | 37528 | 19922726 | 147 |
| Vector-US-2 | Vector | Fmr1    | 37528 | 19922726 | 210 |
| Vector-US-3 | Vector | Fmr1    | 37528 | 24645595 | 156 |
| Vector-US-4 | Vector | Fmr1    | 37528 | 24645595 | 93  |
| Vector-HS-1 | Vector | Fmr1    | 37528 | 19922726 | 46  |
| Vector-OS-1 | Vector | Fmr1    | 37528 | 24645595 | 564 |
| Vector-OS-2 | Vector | Fmr1    | 37528 | 19922726 | 51  |
| p38a-2      | p38a   | Fmr1    | 37528 | 19922726 | 82  |
| p38a-3      | p38a   | Fmr1    | 37528 | 24645595 | 140 |
| p38b-1      | p38b   | Fmr1    | 37528 | 19922726 | 42  |
| p38b-2      | p38b   | Fmr1    | 37528 | 19922726 | 57  |
| p38c-1      | p38c   | Fmr1    | 37528 | 19922726 | 167 |
| p38c-2      | p38c   | Fmr1    | 37528 | 19922726 | 118 |
| p38c-4      | p38c   | Fmr1    | 37528 | 19922726 | 118 |
| Vector-US-1 | Vector | RpS14a  | 47218 | 17975579 | 147 |
| Vector-US-2 | Vector | RpS14a  | 47218 | 17975579 | 114 |
| Vector-US-3 | Vector | RpS14a  | 47218 | 17975579 | 183 |
| Vector-US-4 | Vector | RpS14a  | 47218 | 17975579 | 96  |
| Vector-HS-1 | Vector | RpS14a  | 47218 | 17975579 | 315 |
| Vector-OS-1 | Vector | RpS14a  | 47218 | 17975579 | 383 |
| Mef2-US-1   | Mef2   | RpS14a  | 47218 | 17975579 | 162 |
| Mef2-US-2   | Mef2   | RpS14a  | 47218 | 17975579 | 134 |
| p38a-1      | p38a   | RpS14a  | 47218 | 17975579 | 81  |
| p38a-2      | p38a   | RpS14a  | 47218 | 17975579 | 155 |
| p38a-3      | p38a   | RpS14a  | 47218 | 17975579 | 188 |
| p38a-4      | p38a   | RpS14a  | 47218 | 17975579 | 182 |



|             |        |              |       |           |     |
|-------------|--------|--------------|-------|-----------|-----|
| p38b-1      | p38b   | RpS14a       | 47218 | 17975579  | 47  |
| p38b-3      | p38b   | RpS14a       | 47218 | 17975579  | 67  |
| p38b-4      | p38b   | RpS14a       | 47218 | 17975579  | 61  |
| p38c-1      | p38c   | RpS14a       | 47218 | 17975579  | 212 |
| p38c-2      | p38c   | RpS14a       | 47218 | 17975579  | 268 |
| p38c-3      | p38c   | RpS14a       | 47218 | 17975579  | 221 |
| p38c-4      | p38c   | RpS14a       | 47218 | 17975579  | 209 |
| Vector-US-1 | Vector | mSPS         | 41952 | 281361893 | 147 |
| Vector-OS-1 | Vector | mSPS         | 41952 | 281361893 | 79  |
| p38a-2      | p38a   | mSPS         | 41952 | 281361893 | 40  |
| p38c-1      | p38c   | mSPS         | 41952 | 281361893 | 46  |
| p38c-3      | p38c   | mSPS         | 41952 | 281361893 | 96  |
| Vector-US-1 | Vector | CG31999      | 43777 | 28558748  | 146 |
| Vector-US-2 | Vector | CG31999      | 43777 | 28558748  | 103 |
| Vector-US-3 | Vector | CG31999      | 43777 | 28558748  | 236 |
| Vector-US-4 | Vector | CG31999      | 43777 | 28558748  | 131 |
| Vector-HS-1 | Vector | CG31999      | 43777 | 28558748  | 182 |
| Vector-OS-1 | Vector | CG31999      | 43777 | 28558748  | 232 |
| Vector-OS-3 | Vector | CG31999      | 43777 | 28558748  | 46  |
| p38a-1      | p38a   | CG31999      | 43777 | 28558748  | 77  |
| p38a-2      | p38a   | CG31999      | 43777 | 28558748  | 158 |
| p38a-3      | p38a   | CG31999      | 43777 | 28558748  | 111 |
| p38a-4      | p38a   | CG31999      | 43777 | 28558748  | 82  |
| p38c-1      | p38c   | CG31999      | 43777 | 28558748  | 124 |
| p38c-2      | p38c   | CG31999      | 43777 | 28558748  | 122 |
| p38c-3      | p38c   | CG31999      | 43777 | 28558748  | 76  |
| p38c-4      | p38c   | CG31999      | 43777 | 28558748  | 74  |
| Vector-US-1 | Vector | Pen          | 34338 | 17136998  | 146 |
| Vector-US-3 | Vector | Pen          | 34338 | 17136998  | 86  |
| Vector-US-4 | Vector | Pen          | 34338 | 17136998  | 169 |
| Vector-OS-1 | Vector | Pen          | 34338 | 17136998  | 56  |
| p38a-4      | p38a   | Pen          | 34338 | 17136998  | 96  |
| p38b-1      | p38b   | Pen          | 34338 | 17136998  | 41  |
| p38b-4      | p38b   | Pen          | 34338 | 17136998  | 79  |
| p38c-1      | p38c   | Pen          | 34338 | 17136998  | 121 |
| p38c-2      | p38c   | Pen          | 34338 | 17136998  | 297 |
| p38c-3      | p38c   | Pen          | 34338 | 17136998  | 298 |
| p38c-4      | p38c   | Pen          | 34338 | 17136998  | 182 |
| Vector-US-1 | Vector | snRNP-U1-70K | 33982 | 17137278  | 145 |
| Vector-US-4 | Vector | snRNP-U1-70K | 33982 | 17137278  | 99  |
| Vector-OS-1 | Vector | snRNP-U1-70K | 33982 | 17137278  | 158 |
| p38a-2      | p38a   | snRNP-U1-70K | 33982 | 17137278  | 57  |
| p38b-4      | p38b   | snRNP-U1-70K | 33982 | 17137278  | 82  |
| Vector-US-1 | Vector | RpS3A        | 43768 | 17864162  | 144 |
| Vector-US-2 | Vector | RpS3A        | 43768 | 17864162  | 265 |
| Vector-US-3 | Vector | RpS3A        | 43768 | 17864162  | 387 |
| Vector-US-4 | Vector | RpS3A        | 43768 | 17864162  | 264 |

|             |        |         |       |          |     |
|-------------|--------|---------|-------|----------|-----|
| Vector-HS-1 | Vector | RpS3A   | 43768 | 17864162 | 298 |
| Vector-OS-1 | Vector | RpS3A   | 43768 | 17864162 | 269 |
| Vector-OS-3 | Vector | RpS3A   | 43768 | 17864162 | 82  |
| Mef2-US-1   | Mef2   | RpS3A   | 43768 | 17864162 | 152 |
| Mef2-US-2   | Mef2   | RpS3A   | 43768 | 17864162 | 51  |
| p38a-1      | p38a   | RpS3A   | 43768 | 17864162 | 225 |
| p38a-2      | p38a   | RpS3A   | 43768 | 17864162 | 285 |
| p38a-3      | p38a   | RpS3A   | 43768 | 17864162 | 265 |
| p38a-4      | p38a   | RpS3A   | 43768 | 17864162 | 297 |
| p38b-1      | p38b   | RpS3A   | 43768 | 17864162 | 150 |
| p38b-2      | p38b   | RpS3A   | 43768 | 17864162 | 61  |
| p38b-3      | p38b   | RpS3A   | 43768 | 17864162 | 151 |
| p38b-4      | p38b   | RpS3A   | 43768 | 17864162 | 157 |
| p38c-1      | p38c   | RpS3A   | 43768 | 17864162 | 97  |
| p38c-2      | p38c   | RpS3A   | 43768 | 17864162 | 199 |
| p38c-3      | p38c   | RpS3A   | 43768 | 17864162 | 209 |
| p38c-4      | p38c   | RpS3A   | 43768 | 17864162 | 130 |
| Vector-US-1 | Vector | Uch-L3  | 39102 | 17648095 | 144 |
| Vector-US-2 | Vector | Uch-L3  | 39102 | 17648095 | 148 |
| Vector-US-3 | Vector | Uch-L3  | 39102 | 17648095 | 104 |
| Vector-US-4 | Vector | Uch-L3  | 39102 | 17648095 | 72  |
| Vector-OS-1 | Vector | Uch-L3  | 39102 | 17648095 | 100 |
| p38a-1      | p38a   | Uch-L3  | 39102 | 17648095 | 58  |
| p38c-2      | p38c   | Uch-L3  | 39102 | 17648095 | 56  |
| p38c-3      | p38c   | Uch-L3  | 39102 | 17648095 | 92  |
| Vector-US-1 | Vector | Tm1     | 41852 | 24647089 | 143 |
| Vector-US-4 | Vector | Tm1     | 41852 | 24647089 | 80  |
| Vector-US-1 | Vector | CG10417 | 35492 | 19921654 | 141 |
| Vector-US-3 | Vector | CG10417 | 35492 | 19921654 | 142 |
| Vector-US-4 | Vector | CG10417 | 35492 | 19921654 | 64  |
| p38a-2      | p38a   | CG10417 | 35492 | 19921654 | 65  |
| p38a-3      | p38a   | CG10417 | 35492 | 19921654 | 79  |
| p38a-4      | p38a   | CG10417 | 35492 | 19921654 | 58  |
| p38b-3      | p38b   | CG10417 | 35492 | 19921654 | 58  |
| p38c-2      | p38c   | CG10417 | 35492 | 19921654 | 46  |
| p38c-4      | p38c   | CG10417 | 35492 | 19921654 | 75  |
| Vector-US-1 | Vector | emb     | 34167 | 28574061 | 139 |
| Vector-US-2 | Vector | emb     | 34167 | 28574061 | 185 |
| Vector-US-4 | Vector | emb     | 34167 | 28574061 | 103 |
| Mef2-US-1   | Mef2   | emb     | 34167 | 28574061 | 81  |
| p38a-2      | p38a   | emb     | 34167 | 28574061 | 149 |
| p38a-3      | p38a   | emb     | 34167 | 28574061 | 78  |
| p38c-1      | p38c   | emb     | 34167 | 28574061 | 105 |
| p38c-2      | p38c   | emb     | 34167 | 28574061 | 90  |
| p38c-3      | p38c   | emb     | 34167 | 28574061 | 113 |
| Vector-US-1 | Vector | mus209  | 37290 | 17136790 | 139 |
| Vector-US-1 | Vector | CG31098 | 43057 | 24650011 | 138 |

|             |        |         |       |          |     |
|-------------|--------|---------|-------|----------|-----|
| Vector-US-2 | Vector | CG31098 | 43057 | 24650011 | 492 |
| Vector-US-3 | Vector | CG31098 | 43057 | 24650011 | 370 |
| Vector-US-4 | Vector | CG31098 | 43057 | 24650011 | 345 |
| Vector-HS-1 | Vector | CG31098 | 43057 | 24650011 | 117 |
| Vector-OS-1 | Vector | CG31098 | 43057 | 24650011 | 328 |
| Vector-OS-3 | Vector | CG31098 | 43057 | 24650011 | 62  |
| Mef2-US-1   | Mef2   | CG31098 | 43057 | 24650011 | 68  |
| p38a-1      | p38a   | CG31098 | 43057 | 24650011 | 287 |
| p38a-2      | p38a   | CG31098 | 43057 | 24650011 | 402 |
| p38a-3      | p38a   | CG31098 | 43057 | 24650011 | 260 |
| p38a-4      | p38a   | CG31098 | 43057 | 24650011 | 113 |
| p38c-1      | p38c   | CG31098 | 43057 | 24650011 | 302 |
| p38c-2      | p38c   | CG31098 | 43057 | 24650011 | 345 |
| p38c-3      | p38c   | CG31098 | 43057 | 24650011 | 100 |
| p38c-4      | p38c   | CG31098 | 43057 | 24650011 | 488 |
| Vector-US-1 | Vector | CG17259 | 33518 | 24581334 | 135 |
| Vector-US-1 | Vector | Rpn5    | 40717 | 21357319 | 132 |
| Vector-US-2 | Vector | Rpn5    | 40717 | 21357319 | 145 |
| Vector-US-3 | Vector | Rpn5    | 40717 | 21357319 | 245 |
| Vector-US-4 | Vector | Rpn5    | 40717 | 21357319 | 274 |
| Vector-HS-1 | Vector | Rpn5    | 40717 | 21357319 | 70  |
| Vector-OS-1 | Vector | Rpn5    | 40717 | 21357319 | 113 |
| Mef2-US-1   | Mef2   | Rpn5    | 40717 | 21357319 | 146 |
| p38a-2      | p38a   | Rpn5    | 40717 | 21357319 | 195 |
| p38a-3      | p38a   | Rpn5    | 40717 | 21357319 | 234 |
| p38a-4      | p38a   | Rpn5    | 40717 | 21357319 | 144 |
| p38b-1      | p38b   | Rpn5    | 40717 | 21357319 | 109 |
| p38b-4      | p38b   | Rpn5    | 40717 | 21357319 | 148 |
| p38c-1      | p38c   | Rpn5    | 40717 | 21357319 | 86  |
| p38c-2      | p38c   | Rpn5    | 40717 | 21357319 | 314 |
| p38c-3      | p38c   | Rpn5    | 40717 | 21357319 | 278 |
| Vector-US-1 | Vector | CG7185  | 38937 | 21355973 | 131 |
| Vector-US-2 | Vector | CG7185  | 38937 | 21355973 | 121 |
| Vector-US-3 | Vector | CG7185  | 38937 | 21355973 | 99  |
| Vector-US-4 | Vector | CG7185  | 38937 | 21355973 | 153 |
| Vector-OS-3 | Vector | CG7185  | 38937 | 21355973 | 55  |
| p38a-1      | p38a   | CG7185  | 38937 | 21355973 | 141 |
| p38a-2      | p38a   | CG7185  | 38937 | 21355973 | 183 |
| p38b-1      | p38b   | CG7185  | 38937 | 21355973 | 85  |
| p38b-3      | p38b   | CG7185  | 38937 | 21355973 | 142 |
| p38b-4      | p38b   | CG7185  | 38937 | 21355973 | 137 |
| p38c-1      | p38c   | CG7185  | 38937 | 21355973 | 155 |
| p38c-2      | p38c   | CG7185  | 38937 | 21355973 | 138 |
| p38c-3      | p38c   | CG7185  | 38937 | 21355973 | 125 |
| p38c-4      | p38c   | CG7185  | 38937 | 21355973 | 125 |
| Vector-US-1 | Vector | vig2    | 43016 | 24649935 | 131 |
| Vector-US-2 | Vector | vig2    | 43016 | 24649935 | 116 |

|             |        |         |       |          |     |
|-------------|--------|---------|-------|----------|-----|
| Vector-US-3 | Vector | vig2    | 43016 | 24649935 | 185 |
| Vector-US-4 | Vector | vig2    | 43016 | 24649935 | 155 |
| Vector-OS-1 | Vector | vig2    | 43016 | 24649935 | 197 |
| Mef2-US-1   | Mef2   | vig2    | 43016 | 24649935 | 136 |
| Mef2-US-2   | Mef2   | vig2    | 43016 | 24649935 | 86  |
| p38a-1      | p38a   | vig2    | 43016 | 24649935 | 106 |
| p38a-2      | p38a   | vig2    | 43016 | 24649935 | 33  |
| p38a-3      | p38a   | vig2    | 43016 | 24649935 | 87  |
| p38c-1      | p38c   | vig2    | 43016 | 24649935 | 80  |
| p38c-2      | p38c   | vig2    | 43016 | 24649935 | 88  |
| p38c-3      | p38c   | vig2    | 43016 | 24649935 | 92  |
| p38c-4      | p38c   | vig2    | 43016 | 24649935 | 98  |
| Vector-US-1 | Vector | CG12493 | 38575 | 28574978 | 130 |
| Vector-US-2 | Vector | CG12493 | 38575 | 28574978 | 117 |
| Vector-US-3 | Vector | CG12493 | 38575 | 28574978 | 70  |
| Vector-US-4 | Vector | CG12493 | 38575 | 28574978 | 104 |
| Vector-OS-1 | Vector | CG12493 | 38575 | 28574978 | 142 |
| Mef2-US-2   | Mef2   | CG12493 | 38575 | 28574978 | 103 |
| p38a-2      | p38a   | CG12493 | 38575 | 28574978 | 142 |
| p38c-2      | p38c   | CG12493 | 38575 | 28574978 | 49  |
| p38c-4      | p38c   | CG12493 | 38575 | 28574978 | 49  |
| Vector-US-1 | Vector | CG8223  | 41045 | 21355389 | 130 |
| Vector-US-1 | Vector | CaBP1   | 34976 | 19921434 | 128 |
| Vector-US-2 | Vector | CaBP1   | 34976 | 19921434 | 465 |
| Vector-US-3 | Vector | CaBP1   | 34976 | 19921434 | 297 |
| Vector-US-4 | Vector | CaBP1   | 34976 | 19921434 | 336 |
| Vector-HS-1 | Vector | CaBP1   | 34976 | 19921434 | 73  |
| Vector-OS-1 | Vector | CaBP1   | 34976 | 19921434 | 353 |
| p38a-1      | p38a   | CaBP1   | 34976 | 19921434 | 277 |
| p38a-2      | p38a   | CaBP1   | 34976 | 19921434 | 186 |
| p38a-3      | p38a   | CaBP1   | 34976 | 19921434 | 218 |
| p38a-4      | p38a   | CaBP1   | 34976 | 19921434 | 112 |
| p38b-2      | p38b   | CaBP1   | 34976 | 19921434 | 59  |
| p38c-1      | p38c   | CaBP1   | 34976 | 19921434 | 233 |
| p38c-2      | p38c   | CaBP1   | 34976 | 19921434 | 250 |
| p38c-3      | p38c   | CaBP1   | 34976 | 19921434 | 136 |
| p38c-4      | p38c   | CaBP1   | 34976 | 19921434 | 547 |
| Vector-US-1 | Vector | Pros35  | 34359 | 17737405 | 126 |
| Vector-US-3 | Vector | Pros35  | 34359 | 17737405 | 183 |
| Vector-US-4 | Vector | Pros35  | 34359 | 17737405 | 145 |
| Vector-OS-1 | Vector | Pros35  | 34359 | 17737405 | 70  |
| p38a-1      | p38a   | Pros35  | 34359 | 17737405 | 82  |
| p38a-2      | p38a   | Pros35  | 34359 | 17737405 | 149 |
| p38a-3      | p38a   | Pros35  | 34359 | 17737405 | 257 |
| p38a-4      | p38a   | Pros35  | 34359 | 17737405 | 297 |
| p38b-1      | p38b   | Pros35  | 34359 | 17737405 | 40  |
| p38b-2      | p38b   | Pros35  | 34359 | 17737405 | 48  |

|             |        |           |       |          |     |
|-------------|--------|-----------|-------|----------|-----|
| p38b-4      | p38b   | Pros35    | 34359 | 17737405 | 77  |
| p38c-1      | p38c   | Pros35    | 34359 | 17737405 | 142 |
| p38c-2      | p38c   | Pros35    | 34359 | 17737405 | 219 |
| p38c-3      | p38c   | Pros35    | 34359 | 17737405 | 256 |
| p38c-4      | p38c   | Pros35    | 34359 | 17737405 | 371 |
| Vector-US-1 | Vector | Int6      | 39877 | 17137592 | 124 |
| Vector-US-4 | Vector | Int6      | 39877 | 17137592 | 68  |
| Vector-HS-1 | Vector | Int6      | 39877 | 17137592 | 65  |
| Vector-OS-1 | Vector | Int6      | 39877 | 17137592 | 139 |
| p38a-2      | p38a   | Int6      | 39877 | 17137592 | 74  |
| p38a-3      | p38a   | Int6      | 39877 | 17137592 | 164 |
| p38a-4      | p38a   | Int6      | 39877 | 17137592 | 79  |
| p38b-1      | p38b   | Int6      | 39877 | 17137592 | 93  |
| p38b-2      | p38b   | Int6      | 39877 | 17137592 | 89  |
| p38b-3      | p38b   | Int6      | 39877 | 17137592 | 75  |
| p38b-4      | p38b   | Int6      | 39877 | 17137592 | 96  |
| p38c-1      | p38c   | Int6      | 39877 | 17137592 | 160 |
| p38c-2      | p38c   | Int6      | 39877 | 17137592 | 161 |
| p38c-3      | p38c   | Int6      | 39877 | 17137592 | 161 |
| p38c-4      | p38c   | Int6      | 39877 | 17137592 | 217 |
| Vector-US-1 | Vector | polo      | 40232 | 24667346 | 123 |
| Vector-US-2 | Vector | polo      | 40232 | 24667346 | 60  |
| p38a-1      | p38a   | polo      | 40232 | 24667346 | 44  |
| p38a-2      | p38a   | polo      | 40232 | 24667346 | 48  |
| p38a-4      | p38a   | polo      | 40232 | 24667346 | 78  |
| p38c-4      | p38c   | polo      | 40232 | 24667346 | 70  |
| Vector-US-1 | Vector | Nlp       | 43560 | 17738283 | 123 |
| Vector-US-4 | Vector | Nlp       | 43560 | 17738283 | 83  |
| p38c-3      | p38c   | Nlp       | 43560 | 17738283 | 80  |
| p38c-4      | p38c   | Nlp       | 43560 | 17738283 | 57  |
| Vector-US-1 | Vector | Ckl1alpha | 48448 | 17864602 | 121 |
| Vector-US-2 | Vector | Ckl1alpha | 48448 | 17864602 | 228 |
| Vector-US-3 | Vector | Ckl1alpha | 48448 | 17864602 | 317 |
| Vector-US-4 | Vector | Ckl1alpha | 48448 | 17864602 | 166 |
| Vector-HS-1 | Vector | Ckl1alpha | 48448 | 17864602 | 57  |
| p38a-1      | p38a   | Ckl1alpha | 48448 | 17864602 | 161 |
| p38a-2      | p38a   | Ckl1alpha | 48448 | 17864602 | 137 |
| p38a-3      | p38a   | Ckl1alpha | 48448 | 17864602 | 86  |
| p38c-1      | p38c   | Ckl1alpha | 48448 | 17864602 | 70  |
| p38c-2      | p38c   | Ckl1alpha | 48448 | 17864602 | 93  |
| p38c-4      | p38c   | Ckl1alpha | 48448 | 17864602 | 111 |
| Vector-US-1 | Vector | CG6133    | 45064 | 21355201 | 121 |
| Vector-US-2 | Vector | CG6133    | 45064 | 21355201 | 345 |
| Vector-US-3 | Vector | CG6133    | 45064 | 21355201 | 285 |
| Vector-US-4 | Vector | CG6133    | 45064 | 21355201 | 283 |
| Vector-HS-1 | Vector | CG6133    | 45064 | 21355201 | 222 |
| Vector-OS-1 | Vector | CG6133    | 45064 | 21355201 | 522 |

|             |        |         |       |          |     |
|-------------|--------|---------|-------|----------|-----|
| Vector-OS-2 | Vector | CG6133  | 45064 | 21355201 | 71  |
| p38a-1      | p38a   | CG6133  | 45064 | 21355201 | 186 |
| p38a-2      | p38a   | CG6133  | 45064 | 21355201 | 271 |
| p38a-3      | p38a   | CG6133  | 45064 | 21355201 | 187 |
| p38a-4      | p38a   | CG6133  | 45064 | 21355201 | 201 |
| p38c-1      | p38c   | CG6133  | 45064 | 21355201 | 232 |
| p38c-2      | p38c   | CG6133  | 45064 | 21355201 | 207 |
| p38c-3      | p38c   | CG6133  | 45064 | 21355201 | 68  |
| p38c-4      | p38c   | CG6133  | 45064 | 21355201 | 496 |
| Vector-US-1 | Vector | Ahcy13  | 32471 | 24642172 | 119 |
| Vector-US-2 | Vector | Ahcy13  | 32471 | 24642172 | 62  |
| Vector-US-3 | Vector | Ahcy13  | 32471 | 24642172 | 95  |
| Vector-US-4 | Vector | Ahcy13  | 32471 | 24642172 | 48  |
| p38a-1      | p38a   | Ahcy13  | 32471 | 24642172 | 68  |
| p38a-3      | p38a   | Ahcy13  | 32471 | 24642172 | 62  |
| p38c-2      | p38c   | Ahcy13  | 32471 | 24642172 | 55  |
| p38c-3      | p38c   | Ahcy13  | 32471 | 24642172 | 54  |
| Vector-US-1 | Vector | chic    | 33834 | 17136958 | 118 |
| Vector-US-3 | Vector | chic    | 33834 | 17136958 | 123 |
| Vector-US-4 | Vector | chic    | 33834 | 17136958 | 101 |
| p38a-1      | p38a   | chic    | 33834 | 17136958 | 65  |
| p38a-2      | p38a   | chic    | 33834 | 17136958 | 118 |
| p38c-1      | p38c   | chic    | 33834 | 17136958 | 86  |
| p38c-2      | p38c   | chic    | 33834 | 17136958 | 146 |
| Vector-US-1 | Vector | CG32626 | 32352 | 18859679 | 118 |
| Vector-US-2 | Vector | CG32626 | 32352 | 18859679 | 193 |
| Vector-US-3 | Vector | CG32626 | 32352 | 18859679 | 229 |
| Vector-US-4 | Vector | CG32626 | 32352 | 18859679 | 386 |
| Vector-HS-1 | Vector | CG32626 | 32352 | 18859679 | 85  |
| Vector-OS-1 | Vector | CG32626 | 32352 | 18859679 | 223 |
| Mef2-US-1   | Mef2   | CG32626 | 32352 | 18859679 | 116 |
| p38a-1      | p38a   | CG32626 | 32352 | 18859679 | 68  |
| p38a-2      | p38a   | CG32626 | 32352 | 18859679 | 210 |
| p38a-3      | p38a   | CG32626 | 32352 | 18859679 | 97  |
| p38a-4      | p38a   | CG32626 | 32352 | 18859679 | 133 |
| p38b-1      | p38b   | CG32626 | 32352 | 18859679 | 89  |
| p38b-3      | p38b   | CG32626 | 32352 | 18859679 | 106 |
| p38c-1      | p38c   | CG32626 | 32352 | 18859679 | 75  |
| p38c-2      | p38c   | CG32626 | 32352 | 18859679 | 141 |
| p38c-4      | p38c   | CG32626 | 32352 | 18859679 | 191 |
| Vector-US-1 | Vector | Nacalpa | 36409 | 17137300 | 117 |
| Vector-US-2 | Vector | Nacalpa | 36409 | 17137300 | 46  |
| Vector-US-3 | Vector | Nacalpa | 36409 | 17137300 | 97  |
| Vector-US-4 | Vector | Nacalpa | 36409 | 17137300 | 198 |
| Vector-HS-1 | Vector | Nacalpa | 36409 | 17137300 | 98  |
| Mef2-US-1   | Mef2   | Nacalpa | 36409 | 17137300 | 64  |
| p38a-1      | p38a   | Nacalpa | 36409 | 17137300 | 134 |

|             |        |          |       |           |     |
|-------------|--------|----------|-------|-----------|-----|
| p38a-2      | p38a   | Nacalpa  | 36409 | 17137300  | 36  |
| p38a-3      | p38a   | Nacalpa  | 36409 | 17137300  | 75  |
| p38c-1      | p38c   | Nacalpa  | 36409 | 17137300  | 82  |
| p38c-2      | p38c   | Nacalpa  | 36409 | 17137300  | 78  |
| p38c-3      | p38c   | Nacalpa  | 36409 | 17137300  | 124 |
| p38c-4      | p38c   | Nacalpa  | 36409 | 17137300  | 93  |
| Vector-US-1 | Vector | Aats-asp | 36420 | 17136276  | 117 |
| Vector-US-2 | Vector | Aats-asp | 36420 | 17136276  | 147 |
| Vector-US-3 | Vector | Aats-asp | 36420 | 17136276  | 53  |
| Vector-US-4 | Vector | Aats-asp | 36420 | 17136276  | 105 |
| Vector-HS-1 | Vector | Aats-asp | 36420 | 17136276  | 292 |
| Vector-OS-1 | Vector | Aats-asp | 36420 | 17136276  | 434 |
| Mef2-US-2   | Mef2   | Aats-asp | 36420 | 17136276  | 137 |
| p38a-2      | p38a   | Aats-asp | 36420 | 17136276  | 95  |
| p38b-4      | p38b   | Aats-asp | 36420 | 17136276  | 92  |
| p38c-1      | p38c   | Aats-asp | 36420 | 17136276  | 220 |
| p38c-2      | p38c   | Aats-asp | 36420 | 17136276  | 134 |
| p38c-3      | p38c   | Aats-asp | 36420 | 17136276  | 76  |
| p38c-4      | p38c   | Aats-asp | 36420 | 17136276  | 280 |
| Vector-US-1 | Vector | jub      | 32351 | 221329898 | 117 |
| Vector-US-2 | Vector | jub      | 32351 | 221329898 | 204 |
| Vector-US-3 | Vector | jub      | 32351 | 221329898 | 223 |
| Vector-US-4 | Vector | jub      | 32351 | 221329898 | 150 |
| Vector-HS-1 | Vector | jub      | 32351 | 221329898 | 107 |
| Vector-OS-1 | Vector | jub      | 32351 | 221329898 | 143 |
| p38a-1      | p38a   | jub      | 32351 | 221329898 | 64  |
| p38a-2      | p38a   | jub      | 32351 | 221329898 | 52  |
| p38a-3      | p38a   | jub      | 32351 | 221329898 | 77  |
| p38a-4      | p38a   | jub      | 32351 | 221329898 | 149 |
| p38c-1      | p38c   | jub      | 32351 | 221329898 | 138 |
| p38c-2      | p38c   | jub      | 32351 | 221329898 | 72  |
| p38c-4      | p38c   | jub      | 32351 | 221329898 | 69  |
| Vector-US-1 | Vector | pzg      | 40351 | 24667974  | 117 |
| Vector-US-4 | Vector | pzg      | 40351 | 24667974  | 71  |
| Vector-HS-1 | Vector | pzg      | 40351 | 24667974  | 63  |
| Vector-OS-1 | Vector | pzg      | 40351 | 24667974  | 91  |
| p38a-2      | p38a   | pzg      | 40351 | 24667974  | 249 |
| p38b-4      | p38b   | pzg      | 40351 | 24667974  | 61  |
| p38c-1      | p38c   | pzg      | 40351 | 24667974  | 121 |
| p38c-2      | p38c   | pzg      | 40351 | 24667974  | 159 |
| p38c-3      | p38c   | pzg      | 40351 | 24667974  | 171 |
| p38c-4      | p38c   | pzg      | 40351 | 24667974  | 100 |
| Vector-US-1 | Vector | REG      | 32274 | 18860055  | 116 |
| Vector-US-2 | Vector | REG      | 32274 | 18860055  | 121 |
| Vector-US-3 | Vector | REG      | 32274 | 18860055  | 75  |
| Vector-US-4 | Vector | REG      | 32274 | 18860055  | 61  |
| Vector-HS-1 | Vector | REG      | 32274 | 18860055  | 70  |

|             |        |        |       |          |     |
|-------------|--------|--------|-------|----------|-----|
| Vector-OS-1 | Vector | REG    | 32274 | 18860055 | 172 |
| Vector-OS-2 | Vector | REG    | 32274 | 18860055 | 57  |
| Vector-OS-3 | Vector | REG    | 32274 | 18860055 | 47  |
| p38a-1      | p38a   | REG    | 32274 | 18860055 | 42  |
| p38a-2      | p38a   | REG    | 32274 | 18860055 | 58  |
| p38a-3      | p38a   | REG    | 32274 | 18860055 | 156 |
| p38a-4      | p38a   | REG    | 32274 | 18860055 | 133 |
| p38b-1      | p38b   | REG    | 32274 | 18860055 | 95  |
| p38b-2      | p38b   | REG    | 32274 | 18860055 | 62  |
| p38b-3      | p38b   | REG    | 32274 | 18860055 | 68  |
| p38b-4      | p38b   | REG    | 32274 | 18860055 | 79  |
| p38c-1      | p38c   | REG    | 32274 | 18860055 | 73  |
| p38c-2      | p38c   | REG    | 32274 | 18860055 | 57  |
| p38c-3      | p38c   | REG    | 32274 | 18860055 | 80  |
| p38c-4      | p38c   | REG    | 32274 | 18860055 | 70  |
| Vector-US-1 | Vector | Mlc-c  | 31474 | 17530801 | 116 |
| Vector-US-2 | Vector | Mlc-c  | 31474 | 17530801 | 135 |
| Vector-US-3 | Vector | Mlc-c  | 31474 | 17530801 | 147 |
| Vector-US-4 | Vector | Mlc-c  | 31474 | 17530801 | 131 |
| Vector-OS-1 | Vector | Mlc-c  | 31474 | 17530801 | 144 |
| Vector-OS-3 | Vector | Mlc-c  | 31474 | 17530801 | 51  |
| Mef2-US-2   | Mef2   | Mlc-c  | 31474 | 17530801 | 82  |
| p38a-1      | p38a   | Mlc-c  | 31474 | 17530801 | 104 |
| p38a-2      | p38a   | Mlc-c  | 31474 | 17530801 | 43  |
| p38a-3      | p38a   | Mlc-c  | 31474 | 17530801 | 142 |
| p38a-4      | p38a   | Mlc-c  | 31474 | 17530801 | 138 |
| p38c-1      | p38c   | Mlc-c  | 31474 | 17530801 | 49  |
| p38c-2      | p38c   | Mlc-c  | 31474 | 17530801 | 66  |
| p38c-4      | p38c   | Mlc-c  | 31474 | 17530801 | 71  |
| Vector-US-1 | Vector | p47    | 35674 | 19921734 | 115 |
| Vector-US-2 | Vector | p47    | 35674 | 19921734 | 81  |
| Vector-OS-1 | Vector | p47    | 35674 | 19921734 | 93  |
| p38c-1      | p38c   | p47    | 35674 | 19921734 | 130 |
| p38c-2      | p38c   | p47    | 35674 | 19921734 | 119 |
| p38c-3      | p38c   | p47    | 35674 | 19921734 | 75  |
| p38c-4      | p38c   | p47    | 35674 | 19921734 | 97  |
| Vector-US-1 | Vector | CG7971 | 38206 | 24655488 | 114 |
| Vector-US-3 | Vector | CG7971 | 38206 | 78711771 | 135 |
| Vector-US-4 | Vector | CG7971 | 38206 | 78711771 | 84  |
| Vector-HS-1 | Vector | CG7971 | 38206 | 78711771 | 124 |
| Vector-OS-1 | Vector | CG7971 | 38206 | 78711771 | 86  |
| Mef2-US-2   | Mef2   | CG7971 | 38206 | 78711771 | 131 |
| p38a-2      | p38a   | CG7971 | 38206 | 78706600 | 89  |
| p38a-3      | p38a   | CG7971 | 38206 | 78711771 | 107 |
| p38b-3      | p38b   | CG7971 | 38206 | 24655483 | 89  |
| p38c-1      | p38c   | CG7971 | 38206 | 24655483 | 229 |
| p38c-2      | p38c   | CG7971 | 38206 | 78711771 | 100 |



|             |        |        |       |          |     |
|-------------|--------|--------|-------|----------|-----|
| p38c-3      | p38c   | CG7971 | 38206 | 24655483 | 132 |
| Vector-US-1 | Vector | Dp1    | 37116 | 24655003 | 113 |
| Vector-US-2 | Vector | Dp1    | 37116 | 24655003 | 191 |
| Vector-US-3 | Vector | Dp1    | 37116 | 24655003 | 355 |
| Vector-US-4 | Vector | Dp1    | 37116 | 24655003 | 408 |
| Vector-HS-1 | Vector | Dp1    | 37116 | 24655003 | 219 |
| Vector-OS-1 | Vector | Dp1    | 37116 | 24655003 | 377 |
| Mef2-US-1   | Mef2   | Dp1    | 37116 | 24655003 | 50  |
| p38a-1      | p38a   | Dp1    | 37116 | 24655003 | 232 |
| p38a-2      | p38a   | Dp1    | 37116 | 24655003 | 200 |
| p38a-3      | p38a   | Dp1    | 37116 | 24655003 | 137 |
| p38a-4      | p38a   | Dp1    | 37116 | 24655003 | 204 |
| p38b-1      | p38b   | Dp1    | 37116 | 24655003 | 37  |
| p38b-2      | p38b   | Dp1    | 37116 | 24655003 | 59  |
| p38b-4      | p38b   | Dp1    | 37116 | 24655003 | 48  |
| p38c-1      | p38c   | Dp1    | 37116 | 24655003 | 79  |
| p38c-2      | p38c   | Dp1    | 37116 | 24655003 | 252 |
| p38c-3      | p38c   | Dp1    | 37116 | 24655003 | 273 |
| p38c-4      | p38c   | Dp1    | 37116 | 24655003 | 329 |
| Vector-US-1 | Vector | Srp72  | 42439 | 24648453 | 112 |
| Vector-US-2 | Vector | Srp72  | 42439 | 24648453 | 196 |
| Vector-US-3 | Vector | Srp72  | 42439 | 24648453 | 118 |
| Vector-US-4 | Vector | Srp72  | 42439 | 24648453 | 77  |
| Vector-HS-1 | Vector | Srp72  | 42439 | 24648453 | 76  |
| Vector-OS-1 | Vector | Srp72  | 42439 | 24648453 | 92  |
| p38a-1      | p38a   | Srp72  | 42439 | 24648453 | 71  |
| p38a-2      | p38a   | Srp72  | 42439 | 24648453 | 105 |
| p38a-4      | p38a   | Srp72  | 42439 | 24648453 | 54  |
| p38b-3      | p38b   | Srp72  | 42439 | 24648453 | 64  |
| p38c-2      | p38c   | Srp72  | 42439 | 24648453 | 222 |
| p38c-3      | p38c   | Srp72  | 42439 | 24648453 | 247 |
| p38c-4      | p38c   | Srp72  | 42439 | 24648453 | 338 |
| Vector-US-1 | Vector | RpLP1  | 33214 | 17136320 | 112 |
| Vector-US-2 | Vector | RpLP1  | 33214 | 17136320 | 173 |
| Vector-US-3 | Vector | RpLP1  | 33214 | 17136320 | 166 |
| Vector-US-4 | Vector | RpLP1  | 33214 | 17136320 | 179 |
| Vector-HS-1 | Vector | RpLP1  | 33214 | 17136320 | 199 |
| Vector-OS-1 | Vector | RpLP1  | 33214 | 17136320 | 242 |
| Vector-OS-3 | Vector | RpLP1  | 33214 | 17136320 | 61  |
| Mef2-US-1   | Mef2   | RpLP1  | 33214 | 17136320 | 59  |
| Mef2-US-2   | Mef2   | RpLP1  | 33214 | 17136320 | 90  |
| p38a-1      | p38a   | RpLP1  | 33214 | 17136320 | 165 |
| p38a-2      | p38a   | RpLP1  | 33214 | 17136320 | 161 |
| p38a-3      | p38a   | RpLP1  | 33214 | 17136320 | 119 |
| p38a-4      | p38a   | RpLP1  | 33214 | 17136320 | 100 |
| p38b-2      | p38b   | RpLP1  | 33214 | 17136320 | 63  |
| p38b-4      | p38b   | RpLP1  | 33214 | 17136320 | 49  |

|             |        |        |       |          |     |
|-------------|--------|--------|-------|----------|-----|
| p38c-1      | p38c   | RpLP1  | 33214 | 17136320 | 160 |
| p38c-2      | p38c   | RpLP1  | 33214 | 17136320 | 163 |
| p38c-3      | p38c   | RpLP1  | 33214 | 17136320 | 161 |
| p38c-4      | p38c   | RpLP1  | 33214 | 17136320 | 166 |
| Vector-US-1 | Vector | yps    | 39377 | 24663131 | 112 |
| Vector-US-2 | Vector | yps    | 39377 | 24663131 | 154 |
| Vector-US-3 | Vector | yps    | 39377 | 24663131 | 73  |
| Vector-US-4 | Vector | yps    | 39377 | 24663131 | 100 |
| Vector-HS-1 | Vector | yps    | 39377 | 24663131 | 100 |
| Vector-OS-1 | Vector | yps    | 39377 | 24663131 | 109 |
| Mef2-US-1   | Mef2   | yps    | 39377 | 24663131 | 98  |
| Mef2-US-2   | Mef2   | yps    | 39377 | 24663131 | 99  |
| p38a-1      | p38a   | yps    | 39377 | 24663131 | 47  |
| p38a-2      | p38a   | yps    | 39377 | 24663131 | 81  |
| p38a-3      | p38a   | yps    | 39377 | 24663131 | 102 |
| p38a-4      | p38a   | yps    | 39377 | 24663131 | 59  |
| p38b-2      | p38b   | yps    | 39377 | 24663131 | 49  |
| p38b-3      | p38b   | yps    | 39377 | 24663131 | 88  |
| p38c-1      | p38c   | yps    | 39377 | 24663131 | 168 |
| p38c-2      | p38c   | yps    | 39377 | 24663131 | 106 |
| p38c-3      | p38c   | yps    | 39377 | 24663131 | 130 |
| p38c-4      | p38c   | yps    | 39377 | 24663131 | 68  |
| Vector-US-1 | Vector | mod    | 43764 | 24651794 | 111 |
| Vector-US-2 | Vector | mod    | 43764 | 24651794 | 341 |
| Vector-US-3 | Vector | mod    | 43764 | 24651794 | 234 |
| Vector-US-4 | Vector | mod    | 43764 | 24651794 | 367 |
| Vector-HS-1 | Vector | mod    | 43764 | 24651794 | 132 |
| Vector-OS-1 | Vector | mod    | 43764 | 24651794 | 462 |
| Vector-OS-3 | Vector | mod    | 43764 | 24651794 | 123 |
| Mef2-US-1   | Mef2   | mod    | 43764 | 24651794 | 169 |
| Mef2-US-2   | Mef2   | mod    | 43764 | 24651794 | 93  |
| p38a-1      | p38a   | mod    | 43764 | 24651794 | 129 |
| p38a-2      | p38a   | mod    | 43764 | 24651794 | 249 |
| p38a-3      | p38a   | mod    | 43764 | 24651794 | 346 |
| p38a-4      | p38a   | mod    | 43764 | 24651794 | 109 |
| p38b-1      | p38b   | mod    | 43764 | 24651794 | 87  |
| p38b-4      | p38b   | mod    | 43764 | 24651794 | 54  |
| p38c-2      | p38c   | mod    | 43764 | 24651794 | 266 |
| p38c-3      | p38c   | mod    | 43764 | 24651794 | 188 |
| p38c-4      | p38c   | mod    | 43764 | 24651794 | 217 |
| Vector-US-1 | Vector | VhaSFD | 34997 | 24584671 | 111 |
| Vector-US-4 | Vector | VhaSFD | 34997 | 24584675 | 155 |
| p38a-1      | p38a   | VhaSFD | 34997 | 24584671 | 38  |
| p38a-2      | p38a   | VhaSFD | 34997 | 24584675 | 76  |
| p38a-4      | p38a   | VhaSFD | 34997 | 24584671 | 94  |
| p38c-3      | p38c   | VhaSFD | 34997 | 24584671 | 100 |
| Vector-US-1 | Vector | cpa    | 37387 | 19922662 | 111 |

|             |        |          |         |          |     |
|-------------|--------|----------|---------|----------|-----|
| Vector-OS-1 | Vector | cpa      | 37387   | 19922662 | 118 |
| p38c-1      | p38c   | cpa      | 37387   | 19922662 | 114 |
| Vector-US-1 | Vector | Cyp1     | 32595   | 45549139 | 111 |
| Vector-US-2 | Vector | Cyp1     | 32595   | 45549139 | 69  |
| Vector-US-3 | Vector | Cyp1     | 32595   | 45549139 | 128 |
| Vector-US-4 | Vector | Cyp1     | 32595   | 45549139 | 51  |
| Vector-OS-1 | Vector | Cyp1     | 32595   | 45549139 | 124 |
| p38a-1      | p38a   | Cyp1     | 32595   | 45549139 | 54  |
| p38a-2      | p38a   | Cyp1     | 32595   | 45549139 | 53  |
| p38a-4      | p38a   | Cyp1     | 32595   | 45549139 | 136 |
| Vector-US-1 | Vector | ear      | 44451   | 21356101 | 109 |
| p38a-2      | p38a   | ear      | 44451   | 21356101 | 67  |
| p38c-1      | p38c   | ear      | 44451   | 21356101 | 108 |
| p38c-3      | p38c   | ear      | 44451   | 21356101 | 52  |
| p38c-4      | p38c   | ear      | 44451   | 21356101 | 55  |
| Vector-US-1 | Vector | Pp2A-29B | 2768940 | 78706846 | 108 |
| Vector-US-2 | Vector | Pp2A-29B | 2768940 | 78706846 | 128 |
| Vector-US-4 | Vector | Pp2A-29B | 2768940 | 78706846 | 84  |
| Vector-OS-1 | Vector | Pp2A-29B | 2768940 | 78706846 | 128 |
| Mef2-US-1   | Mef2   | Pp2A-29B | 2768940 | 78706846 | 79  |
| p38a-1      | p38a   | Pp2A-29B | 2768940 | 78706846 | 91  |
| p38a-2      | p38a   | Pp2A-29B | 2768940 | 78706846 | 80  |
| p38b-3      | p38b   | Pp2A-29B | 2768940 | 78706846 | 109 |
| p38c-1      | p38c   | Pp2A-29B | 2768940 | 78706846 | 72  |
| p38c-2      | p38c   | Pp2A-29B | 2768940 | 78706846 | 88  |
| p38c-3      | p38c   | Pp2A-29B | 2768940 | 78706846 | 94  |
| p38c-4      | p38c   | Pp2A-29B | 2768940 | 78706846 | 155 |
| Vector-US-1 | Vector | nop5     | 33966   | 17137636 | 106 |
| Vector-US-2 | Vector | nop5     | 33966   | 17137636 | 104 |
| Vector-US-4 | Vector | nop5     | 33966   | 17137636 | 177 |
| Vector-OS-1 | Vector | nop5     | 33966   | 17137636 | 154 |
| p38a-1      | p38a   | nop5     | 33966   | 17137636 | 53  |
| p38a-2      | p38a   | nop5     | 33966   | 17137636 | 103 |
| p38a-4      | p38a   | nop5     | 33966   | 17137636 | 62  |
| p38b-1      | p38b   | nop5     | 33966   | 17137636 | 30  |
| p38b-2      | p38b   | nop5     | 33966   | 17137636 | 67  |
| p38b-4      | p38b   | nop5     | 33966   | 17137636 | 85  |
| p38c-1      | p38c   | nop5     | 33966   | 17137636 | 74  |
| p38c-2      | p38c   | nop5     | 33966   | 17137636 | 81  |
| p38c-3      | p38c   | nop5     | 33966   | 17137636 | 69  |
| p38c-4      | p38c   | nop5     | 33966   | 17137636 | 195 |
| Vector-US-1 | Vector | eIF-3p40 | 45682   | 45549263 | 106 |
| Vector-US-2 | Vector | eIF-3p40 | 45682   | 45549263 | 65  |
| Vector-US-3 | Vector | eIF-3p40 | 45682   | 45549263 | 112 |
| Vector-US-4 | Vector | eIF-3p40 | 45682   | 45549263 | 157 |
| Vector-HS-1 | Vector | eIF-3p40 | 45682   | 45549263 | 180 |
| Vector-OS-1 | Vector | eIF-3p40 | 45682   | 45549263 | 163 |

|             |        |          |       |          |     |
|-------------|--------|----------|-------|----------|-----|
| Vector-OS-2 | Vector | eIF-3p40 | 45682 | 45549263 | 130 |
| p38a-2      | p38a   | eIF-3p40 | 45682 | 45549263 | 109 |
| p38a-3      | p38a   | eIF-3p40 | 45682 | 45549263 | 73  |
| p38b-1      | p38b   | eIF-3p40 | 45682 | 45549263 | 72  |
| p38b-4      | p38b   | eIF-3p40 | 45682 | 45549263 | 83  |
| p38c-1      | p38c   | eIF-3p40 | 45682 | 45549263 | 125 |
| p38c-2      | p38c   | eIF-3p40 | 45682 | 45549263 | 182 |
| p38c-3      | p38c   | eIF-3p40 | 45682 | 45549263 | 128 |
| p38c-4      | p38c   | eIF-3p40 | 45682 | 45549263 | 201 |
| Vector-US-1 | Vector | CG5913   | 43132 | 24650182 | 103 |
| Vector-US-3 | Vector | CG5913   | 43132 | 24650182 | 98  |
| Vector-US-4 | Vector | CG5913   | 43132 | 24650182 | 65  |
| Vector-OS-1 | Vector | CG5913   | 43132 | 24650182 | 95  |
| p38a-2      | p38a   | CG5913   | 43132 | 24650182 | 61  |
| p38a-3      | p38a   | CG5913   | 43132 | 24650182 | 75  |
| p38b-1      | p38b   | CG5913   | 43132 | 24650182 | 35  |
| Vector-US-1 | Vector | HmgD     | 37481 | 24657284 | 102 |
| Vector-US-2 | Vector | HmgD     | 37481 | 24657284 | 95  |
| Vector-US-3 | Vector | HmgD     | 37481 | 24657284 | 102 |
| Vector-HS-1 | Vector | HmgD     | 37481 | 24657284 | 106 |
| Vector-OS-1 | Vector | HmgD     | 37481 | 24657284 | 105 |
| Mef2-US-1   | Mef2   | HmgD     | 37481 | 24657284 | 97  |
| Mef2-US-2   | Mef2   | HmgD     | 37481 | 24657284 | 138 |
| p38a-2      | p38a   | HmgD     | 37481 | 24657284 | 106 |
| p38a-3      | p38a   | HmgD     | 37481 | 24657284 | 94  |
| p38b-3      | p38b   | HmgD     | 37481 | 24657284 | 126 |
| p38b-4      | p38b   | HmgD     | 37481 | 24657284 | 94  |
| p38c-1      | p38c   | HmgD     | 37481 | 24657284 | 91  |
| p38c-2      | p38c   | HmgD     | 37481 | 24657284 | 98  |
| p38c-3      | p38c   | HmgD     | 37481 | 24657284 | 105 |
| p38c-4      | p38c   | HmgD     | 37481 | 24657284 | 99  |
| Vector-US-1 | Vector | skap     | 41067 | 24645208 | 99  |
| Vector-US-2 | Vector | skap     | 41067 | 24645208 | 152 |
| p38b-2      | p38b   | skap     | 41067 | 24645208 | 46  |
| Vector-US-1 | Vector | CG7564   | 39956 | 24665973 | 99  |
| Vector-US-2 | Vector | CG7564   | 39956 | 24665973 | 122 |
| Vector-US-3 | Vector | CG7564   | 39956 | 24665973 | 247 |
| Vector-HS-1 | Vector | CG7564   | 39956 | 24665973 | 103 |
| Vector-OS-1 | Vector | CG7564   | 39956 | 24665973 | 238 |
| Vector-OS-3 | Vector | CG7564   | 39956 | 24665973 | 55  |
| p38a-1      | p38a   | CG7564   | 39956 | 24665973 | 95  |
| p38a-2      | p38a   | CG7564   | 39956 | 24665973 | 111 |
| p38a-4      | p38a   | CG7564   | 39956 | 24665973 | 90  |
| p38b-4      | p38b   | CG7564   | 39956 | 24665973 | 89  |
| p38c-1      | p38c   | CG7564   | 39956 | 24665973 | 234 |
| p38c-2      | p38c   | CG7564   | 39956 | 24665973 | 134 |
| p38c-3      | p38c   | CG7564   | 39956 | 24665973 | 93  |

|             |        |         |       |          |     |
|-------------|--------|---------|-------|----------|-----|
| p38c-4      | p38c   | CG7564  | 39956 | 24665973 | 175 |
| Vector-US-1 | Vector | zetaCOP | 39862 | 21356771 | 98  |
| Vector-US-2 | Vector | zetaCOP | 39862 | 21356771 | 78  |
| Vector-US-3 | Vector | zetaCOP | 39862 | 21356771 | 85  |
| Vector-US-4 | Vector | zetaCOP | 39862 | 21356771 | 121 |
| Vector-OS-1 | Vector | zetaCOP | 39862 | 21356771 | 93  |
| Vector-OS-2 | Vector | zetaCOP | 39862 | 21356771 | 59  |
| Vector-OS-3 | Vector | zetaCOP | 39862 | 21356771 | 49  |
| p38a-3      | p38a   | zetaCOP | 39862 | 21356771 | 83  |
| p38a-4      | p38a   | zetaCOP | 39862 | 21356771 | 87  |
| p38b-2      | p38b   | zetaCOP | 39862 | 21356771 | 99  |
| p38c-1      | p38c   | zetaCOP | 39862 | 21356771 | 80  |
| p38c-2      | p38c   | zetaCOP | 39862 | 21356771 | 72  |
| p38c-3      | p38c   | zetaCOP | 39862 | 21356771 | 99  |
| p38c-4      | p38c   | zetaCOP | 39862 | 21356771 | 102 |
| Vector-US-1 | Vector | RpA-70  | 40972 | 17737841 | 98  |
| Vector-US-4 | Vector | RpA-70  | 40972 | 17737841 | 49  |
| Vector-OS-1 | Vector | RpA-70  | 40972 | 17737841 | 151 |
| p38a-2      | p38a   | RpA-70  | 40972 | 17737841 | 36  |
| p38a-4      | p38a   | RpA-70  | 40972 | 17737841 | 78  |
| p38c-2      | p38c   | RpA-70  | 40972 | 17737841 | 100 |
| p38c-3      | p38c   | RpA-70  | 40972 | 17737841 | 63  |
| p38c-4      | p38c   | RpA-70  | 40972 | 17737841 | 208 |
| Vector-US-1 | Vector | PP2A-B' | 42169 | 24647839 | 97  |
| Vector-US-1 | Vector | Ef2b    | 35422 | 24585709 | 97  |
| Vector-US-2 | Vector | Ef2b    | 35422 | 24585709 | 61  |
| Vector-US-3 | Vector | Ef2b    | 35422 | 24585709 | 48  |
| Vector-US-4 | Vector | Ef2b    | 35422 | 24585709 | 79  |
| Vector-HS-1 | Vector | Ef2b    | 35422 | 24585709 | 49  |
| p38a-1      | p38a   | Ef2b    | 35422 | 24585709 | 71  |
| p38a-3      | p38a   | Ef2b    | 35422 | 24585709 | 63  |
| p38c-1      | p38c   | Ef2b    | 35422 | 24585709 | 73  |
| p38c-2      | p38c   | Ef2b    | 35422 | 24585709 | 48  |
| Vector-US-1 | Vector | pAbp    | 37070 | 17136378 | 95  |
| Vector-US-2 | Vector | pAbp    | 37070 | 17136378 | 141 |
| Vector-US-3 | Vector | pAbp    | 37070 | 17136378 | 142 |
| Vector-US-4 | Vector | pAbp    | 37070 | 17136378 | 98  |
| Vector-OS-1 | Vector | pAbp    | 37070 | 17136378 | 80  |
| p38a-3      | p38a   | pAbp    | 37070 | 17136378 | 53  |
| p38b-1      | p38b   | pAbp    | 37070 | 17136378 | 37  |
| p38b-3      | p38b   | pAbp    | 37070 | 17136378 | 151 |
| p38b-4      | p38b   | pAbp    | 37070 | 17136378 | 110 |
| p38c-1      | p38c   | pAbp    | 37070 | 17136378 | 148 |
| p38c-2      | p38c   | pAbp    | 37070 | 17136378 | 199 |
| p38c-3      | p38c   | pAbp    | 37070 | 17136378 | 235 |
| p38c-4      | p38c   | pAbp    | 37070 | 17136378 | 185 |
| Vector-US-1 | Vector | Rpt4    | 31567 | 24640100 | 95  |

|             |        |        |       |          |     |
|-------------|--------|--------|-------|----------|-----|
| Vector-US-2 | Vector | Rpt4   | 31567 | 24640100 | 293 |
| Vector-US-3 | Vector | Rpt4   | 31567 | 24640100 | 270 |
| Vector-US-4 | Vector | Rpt4   | 31567 | 24640100 | 318 |
| Vector-OS-1 | Vector | Rpt4   | 31567 | 24640100 | 254 |
| Vector-OS-2 | Vector | Rpt4   | 31567 | 24640100 | 71  |
| Vector-OS-3 | Vector | Rpt4   | 31567 | 24640100 | 235 |
| Mef2-US-2   | Mef2   | Rpt4   | 31567 | 24640100 | 98  |
| p38a-1      | p38a   | Rpt4   | 31567 | 24640100 | 40  |
| p38a-2      | p38a   | Rpt4   | 31567 | 24640100 | 236 |
| p38a-4      | p38a   | Rpt4   | 31567 | 24640100 | 277 |
| p38b-1      | p38b   | Rpt4   | 31567 | 24640100 | 157 |
| p38b-3      | p38b   | Rpt4   | 31567 | 24640100 | 151 |
| p38b-4      | p38b   | Rpt4   | 31567 | 24640100 | 143 |
| p38c-1      | p38c   | Rpt4   | 31567 | 24640100 | 150 |
| p38c-2      | p38c   | Rpt4   | 31567 | 24640100 | 159 |
| p38c-3      | p38c   | Rpt4   | 31567 | 24640100 | 181 |
| p38c-4      | p38c   | Rpt4   | 31567 | 24640100 | 305 |
| Vector-US-1 | Vector | Pros54 | 40388 | 17737721 | 94  |
| Vector-US-2 | Vector | Pros54 | 40388 | 17737721 | 83  |
| Vector-US-3 | Vector | Pros54 | 40388 | 17737721 | 141 |
| Vector-US-4 | Vector | Pros54 | 40388 | 17737721 | 101 |
| Mef2-US-1   | Mef2   | Pros54 | 40388 | 17737721 | 113 |
| p38a-3      | p38a   | Pros54 | 40388 | 17737721 | 56  |
| p38a-4      | p38a   | Pros54 | 40388 | 17737721 | 77  |
| p38b-1      | p38b   | Pros54 | 40388 | 17737721 | 36  |
| p38b-2      | p38b   | Pros54 | 40388 | 17737721 | 72  |
| p38b-3      | p38b   | Pros54 | 40388 | 17737721 | 93  |
| p38b-4      | p38b   | Pros54 | 40388 | 17737721 | 88  |
| p38c-1      | p38c   | Pros54 | 40388 | 17737721 | 51  |
| p38c-2      | p38c   | Pros54 | 40388 | 17737721 | 107 |
| p38c-3      | p38c   | Pros54 | 40388 | 17737721 | 62  |
| p38c-4      | p38c   | Pros54 | 40388 | 17737721 | 107 |
| Vector-US-1 | Vector | RanGap | 35223 | 17136452 | 93  |
| Vector-US-3 | Vector | RanGap | 35223 | 17136452 | 82  |
| Vector-US-1 | Vector | BicD   | 35051 | 24584833 | 93  |
| Vector-US-4 | Vector | BicD   | 35051 | 24584833 | 104 |
| p38a-1      | p38a   | BicD   | 35051 | 24584833 | 56  |
| p38a-4      | p38a   | BicD   | 35051 | 24584833 | 86  |
| p38c-2      | p38c   | BicD   | 35051 | 24584833 | 176 |
| p38c-3      | p38c   | BicD   | 35051 | 24584833 | 137 |
| p38c-4      | p38c   | BicD   | 35051 | 24584833 | 57  |
| Vector-US-1 | Vector | bic    | 45827 | 17136698 | 91  |
| Vector-US-2 | Vector | bic    | 45827 | 17136698 | 79  |
| Vector-US-3 | Vector | bic    | 45827 | 17136698 | 98  |
| Vector-OS-2 | Vector | bic    | 45827 | 17136698 | 48  |
| Vector-OS-3 | Vector | bic    | 45827 | 17136698 | 52  |
| p38a-2      | p38a   | bic    | 45827 | 17136698 | 90  |

|             |        |         |       |          |     |
|-------------|--------|---------|-------|----------|-----|
| p38b-3      | p38b   | bic     | 45827 | 17136698 | 78  |
| p38b-4      | p38b   | bic     | 45827 | 17136698 | 71  |
| p38c-1      | p38c   | bic     | 45827 | 17136698 | 74  |
| p38c-2      | p38c   | bic     | 45827 | 17136698 | 65  |
| p38c-3      | p38c   | bic     | 45827 | 17136698 | 56  |
| Vector-US-1 | Vector | Mcm2    | 40973 | 17137132 | 90  |
| Vector-US-3 | Vector | Mcm2    | 40973 | 17137132 | 61  |
| Vector-US-4 | Vector | Mcm2    | 40973 | 17137132 | 121 |
| p38a-2      | p38a   | Mcm2    | 40973 | 17137132 | 44  |
| p38a-3      | p38a   | Mcm2    | 40973 | 17137132 | 66  |
| p38c-1      | p38c   | Mcm2    | 40973 | 17137132 | 75  |
| p38c-2      | p38c   | Mcm2    | 40973 | 17137132 | 93  |
| p38c-3      | p38c   | Mcm2    | 40973 | 17137132 | 100 |
| p38c-4      | p38c   | Mcm2    | 40973 | 17137132 | 102 |
| Vector-US-1 | Vector | Synd    | 42467 | 28571785 | 89  |
| Vector-US-3 | Vector | Synd    | 42467 | 28571785 | 78  |
| p38c-4      | p38c   | Synd    | 42467 | 28571785 | 48  |
| Vector-US-1 | Vector | CG11198 | 35761 | 24586458 | 89  |
| Vector-US-2 | Vector | CG11198 | 35761 | 24586458 | 142 |
| Vector-US-4 | Vector | CG11198 | 35761 | 24586458 | 191 |
| Vector-OS-1 | Vector | CG11198 | 35761 | 24586458 | 63  |
| p38a-1      | p38a   | CG11198 | 35761 | 24586458 | 102 |
| p38a-2      | p38a   | CG11198 | 35761 | 24586458 | 182 |
| p38a-3      | p38a   | CG11198 | 35761 | 24586458 | 120 |
| p38a-4      | p38a   | CG11198 | 35761 | 24586458 | 176 |
| p38c-2      | p38c   | CG11198 | 35761 | 24586458 | 147 |
| p38c-3      | p38c   | CG11198 | 35761 | 24586458 | 232 |
| p38c-4      | p38c   | CG11198 | 35761 | 24586458 | 381 |
| Vector-US-1 | Vector | Crc     | 41166 | 24645441 | 88  |
| Vector-US-2 | Vector | Crc     | 41166 | 24645441 | 50  |
| Vector-US-3 | Vector | Crc     | 41166 | 24645441 | 81  |
| Vector-US-4 | Vector | Crc     | 41166 | 24645441 | 123 |
| Vector-OS-1 | Vector | Crc     | 41166 | 24645441 | 124 |
| Vector-OS-3 | Vector | Crc     | 41166 | 24645441 | 52  |
| Mef2-US-1   | Mef2   | Crc     | 41166 | 24645441 | 83  |
| p38a-1      | p38a   | Crc     | 41166 | 24645441 | 194 |
| p38a-2      | p38a   | Crc     | 41166 | 24645441 | 102 |
| p38a-4      | p38a   | Crc     | 41166 | 24645441 | 76  |
| p38c-1      | p38c   | Crc     | 41166 | 24645441 | 118 |
| p38c-2      | p38c   | Crc     | 41166 | 24645441 | 160 |
| p38c-3      | p38c   | Crc     | 41166 | 24645441 | 86  |
| p38c-4      | p38c   | Crc     | 41166 | 24645441 | 115 |
| Vector-US-1 | Vector | Ars2    | 35539 | 24585954 | 87  |
| Vector-US-2 | Vector | Ars2    | 35539 | 24585954 | 560 |
| Vector-US-3 | Vector | Ars2    | 35539 | 24585954 | 117 |
| Vector-US-4 | Vector | Ars2    | 35539 | 24585954 | 225 |
| Vector-OS-1 | Vector | Ars2    | 35539 | 24585954 | 481 |

|             |        |        |       |          |     |
|-------------|--------|--------|-------|----------|-----|
| Vector-OS-2 | Vector | Ars2   | 35539 | 24585954 | 50  |
| p38a-2      | p38a   | Ars2   | 35539 | 24585954 | 134 |
| p38a-4      | p38a   | Ars2   | 35539 | 24585954 | 63  |
| p38c-1      | p38c   | Ars2   | 35539 | 24585954 | 102 |
| p38c-2      | p38c   | Ars2   | 35539 | 24585954 | 69  |
| p38c-3      | p38c   | Ars2   | 35539 | 24585954 | 79  |
| p38c-4      | p38c   | Ars2   | 35539 | 24585954 | 88  |
| Vector-US-1 | Vector | r      | 32640 | 45555749 | 87  |
| Vector-US-2 | Vector | r      | 32640 | 45555749 | 59  |
| p38a-2      | p38a   | r      | 32640 | 24642586 | 42  |
| p38c-2      | p38c   | r      | 32640 | 45555749 | 80  |
| Vector-US-1 | Vector | Art1   | 41295 | 21356361 | 87  |
| Vector-US-3 | Vector | Art1   | 41295 | 21356361 | 99  |
| Vector-US-1 | Vector | CG1516 | 36020 | 19921944 | 86  |
| Vector-US-2 | Vector | CG1516 | 36020 | 19921944 | 91  |
| Vector-US-4 | Vector | CG1516 | 36020 | 19921944 | 160 |
| p38a-1      | p38a   | CG1516 | 36020 | 19921944 | 117 |
| p38a-4      | p38a   | CG1516 | 36020 | 19921944 | 103 |
| p38b-4      | p38b   | CG1516 | 36020 | 19921944 | 70  |
| p38c-2      | p38c   | CG1516 | 36020 | 19921944 | 91  |
| p38c-3      | p38c   | CG1516 | 36020 | 19921944 | 142 |
| p38c-4      | p38c   | CG1516 | 36020 | 19921944 | 225 |
| Vector-US-1 | Vector | CG5976 | 40270 | 28574642 | 86  |
| Vector-US-2 | Vector | CG5976 | 40270 | 28574642 | 166 |
| Vector-US-3 | Vector | CG5976 | 40270 | 28574642 | 375 |
| Vector-US-4 | Vector | CG5976 | 40270 | 28574642 | 136 |
| Vector-HS-1 | Vector | CG5976 | 40270 | 28574642 | 138 |
| Vector-OS-1 | Vector | CG5976 | 40270 | 28574642 | 185 |
| Mef2-US-1   | Mef2   | CG5976 | 40270 | 28574642 | 66  |
| Mef2-US-2   | Mef2   | CG5976 | 40270 | 28574642 | 85  |
| p38a-1      | p38a   | CG5976 | 40270 | 28574642 | 112 |
| p38a-2      | p38a   | CG5976 | 40270 | 28574642 | 127 |
| p38a-3      | p38a   | CG5976 | 40270 | 28574642 | 150 |
| p38a-4      | p38a   | CG5976 | 40270 | 28574642 | 161 |
| p38b-1      | p38b   | CG5976 | 40270 | 28574642 | 66  |
| p38b-2      | p38b   | CG5976 | 40270 | 28574642 | 125 |
| p38b-3      | p38b   | CG5976 | 40270 | 28574642 | 191 |
| p38b-4      | p38b   | CG5976 | 40270 | 28574642 | 76  |
| p38c-1      | p38c   | CG5976 | 40270 | 28574642 | 161 |
| p38c-2      | p38c   | CG5976 | 40270 | 28574642 | 190 |
| p38c-3      | p38c   | CG5976 | 40270 | 28574642 | 122 |
| p38c-4      | p38c   | CG5976 | 40270 | 28574640 | 193 |
| Vector-US-1 | Vector | pic    | 41611 | 21357503 | 83  |
| Vector-US-2 | Vector | pic    | 41611 | 21357503 | 121 |
| Vector-US-4 | Vector | pic    | 41611 | 21357503 | 205 |
| p38a-1      | p38a   | pic    | 41611 | 21357503 | 76  |
| p38a-4      | p38a   | pic    | 41611 | 21357503 | 126 |



|             |        |        |         |           |     |
|-------------|--------|--------|---------|-----------|-----|
| p38b-1      | p38b   | pic    | 41611   | 21357503  | 40  |
| p38b-3      | p38b   | pic    | 41611   | 21357503  | 118 |
| p38b-4      | p38b   | pic    | 41611   | 21357503  | 65  |
| p38c-2      | p38c   | pic    | 41611   | 21357503  | 83  |
| p38c-4      | p38c   | pic    | 41611   | 21357503  | 60  |
| Vector-US-1 | Vector | RpL5   | 3355124 | 116007382 | 82  |
| Vector-HS-1 | Vector | RpL5   | 3355124 | 116007382 | 48  |
| Vector-OS-1 | Vector | RpL5   | 3355124 | 281365365 | 188 |
| Vector-US-1 | Vector | CG1240 | 38341   | 21357829  | 82  |
| Vector-US-2 | Vector | CG1240 | 38341   | 21357829  | 154 |
| Vector-US-3 | Vector | CG1240 | 38341   | 21357829  | 59  |
| Vector-US-4 | Vector | CG1240 | 38341   | 21357829  | 148 |
| Vector-HS-1 | Vector | CG1240 | 38341   | 21357829  | 117 |
| Vector-OS-1 | Vector | CG1240 | 38341   | 21357829  | 200 |
| Vector-OS-2 | Vector | CG1240 | 38341   | 21357829  | 105 |
| Vector-OS-3 | Vector | CG1240 | 38341   | 21357829  | 68  |
| Mef2-US-1   | Mef2   | CG1240 | 38341   | 21357829  | 93  |
| p38a-2      | p38a   | CG1240 | 38341   | 21357829  | 150 |
| p38a-3      | p38a   | CG1240 | 38341   | 21357829  | 176 |
| p38a-4      | p38a   | CG1240 | 38341   | 21357829  | 84  |
| p38b-3      | p38b   | CG1240 | 38341   | 21357829  | 57  |
| p38b-4      | p38b   | CG1240 | 38341   | 21357829  | 98  |
| p38c-1      | p38c   | CG1240 | 38341   | 21357829  | 143 |
| p38c-2      | p38c   | CG1240 | 38341   | 21357829  | 75  |
| p38c-3      | p38c   | CG1240 | 38341   | 21357829  | 127 |
| p38c-4      | p38c   | CG1240 | 38341   | 21357829  | 79  |
| Vector-US-1 | Vector | RpLP0  | 40451   | 17737731  | 82  |
| Vector-US-2 | Vector | RpLP0  | 40451   | 17737731  | 150 |
| Vector-US-3 | Vector | RpLP0  | 40451   | 17737731  | 114 |
| Vector-HS-1 | Vector | RpLP0  | 40451   | 17737731  | 181 |
| Vector-OS-1 | Vector | RpLP0  | 40451   | 17737731  | 286 |
| Vector-OS-2 | Vector | RpLP0  | 40451   | 17737731  | 168 |
| Vector-OS-3 | Vector | RpLP0  | 40451   | 17737731  | 47  |
| p38a-2      | p38a   | RpLP0  | 40451   | 17737731  | 82  |
| p38c-4      | p38c   | RpLP0  | 40451   | 17737731  | 120 |
| Vector-US-1 | Vector | CG4164 | 33220   | 19920464  | 81  |
| Vector-US-2 | Vector | CG4164 | 33220   | 19920464  | 210 |
| Vector-HS-1 | Vector | CG4164 | 33220   | 19920464  | 54  |
| Vector-OS-1 | Vector | CG4164 | 33220   | 19920464  | 141 |
| p38a-1      | p38a   | CG4164 | 33220   | 19920464  | 143 |
| p38a-3      | p38a   | CG4164 | 33220   | 19920464  | 87  |
| p38c-2      | p38c   | CG4164 | 33220   | 19920464  | 58  |
| p38c-3      | p38c   | CG4164 | 33220   | 19920464  | 72  |
| p38c-4      | p38c   | CG4164 | 33220   | 19920464  | 136 |
| Vector-US-1 | Vector | CG4747 | 192507  | 28574115  | 81  |
| Vector-US-4 | Vector | CG4747 | 192507  | 28574115  | 160 |
| Vector-OS-1 | Vector | CG4747 | 192507  | 28574115  | 174 |

|             |        |        |        |          |     |
|-------------|--------|--------|--------|----------|-----|
| p38a-2      | p38a   | CG4747 | 192507 | 28574115 | 73  |
| p38c-2      | p38c   | CG4747 | 192507 | 28574115 | 73  |
| p38c-4      | p38c   | CG4747 | 192507 | 28574115 | 112 |
| Vector-US-1 | Vector | CG6453 | 35056  | 19921464 | 81  |
| Vector-US-2 | Vector | CG6453 | 35056  | 19921464 | 295 |
| Vector-US-3 | Vector | CG6453 | 35056  | 19921464 | 165 |
| Vector-US-4 | Vector | CG6453 | 35056  | 19921464 | 110 |
| Vector-HS-1 | Vector | CG6453 | 35056  | 19921464 | 124 |
| Vector-OS-1 | Vector | CG6453 | 35056  | 19921464 | 347 |
| Vector-OS-2 | Vector | CG6453 | 35056  | 19921464 | 77  |
| Vector-OS-3 | Vector | CG6453 | 35056  | 19921464 | 50  |
| Mef2-US-2   | Mef2   | CG6453 | 35056  | 19921464 | 62  |
| p38a-3      | p38a   | CG6453 | 35056  | 19921464 | 140 |
| p38a-4      | p38a   | CG6453 | 35056  | 19921464 | 93  |
| p38b-2      | p38b   | CG6453 | 35056  | 19921464 | 101 |
| p38c-1      | p38c   | CG6453 | 35056  | 19921464 | 162 |
| p38c-2      | p38c   | CG6453 | 35056  | 19921464 | 245 |
| p38c-3      | p38c   | CG6453 | 35056  | 19921464 | 149 |
| p38c-4      | p38c   | CG6453 | 35056  | 19921464 | 331 |
| Vector-US-1 | Vector | RpL11  | 37235  | 17137026 | 80  |
| Vector-US-2 | Vector | RpL11  | 37235  | 17137026 | 92  |
| Vector-HS-1 | Vector | RpL11  | 37235  | 17137026 | 101 |
| Vector-OS-1 | Vector | RpL11  | 37235  | 17137026 | 48  |
| Mef2-US-2   | Mef2   | RpL11  | 37235  | 17137026 | 67  |
| p38a-1      | p38a   | RpL11  | 37235  | 17137026 | 66  |
| p38a-4      | p38a   | RpL11  | 37235  | 17137026 | 71  |
| Vector-US-1 | Vector | Rpn3   | 35176  | 17137450 | 80  |
| Vector-US-2 | Vector | Rpn3   | 35176  | 17137450 | 95  |
| Vector-US-3 | Vector | Rpn3   | 35176  | 17137450 | 90  |
| Vector-US-4 | Vector | Rpn3   | 35176  | 17137450 | 226 |
| Vector-OS-1 | Vector | Rpn3   | 35176  | 17137450 | 291 |
| p38a-1      | p38a   | Rpn3   | 35176  | 17137450 | 95  |
| p38a-2      | p38a   | Rpn3   | 35176  | 17137450 | 103 |
| p38a-3      | p38a   | Rpn3   | 35176  | 17137450 | 265 |
| p38a-4      | p38a   | Rpn3   | 35176  | 17137450 | 122 |
| p38b-3      | p38b   | Rpn3   | 35176  | 17137450 | 46  |
| p38c-1      | p38c   | Rpn3   | 35176  | 17137450 | 69  |
| p38c-2      | p38c   | Rpn3   | 35176  | 17137450 | 120 |
| p38c-3      | p38c   | Rpn3   | 35176  | 17137450 | 312 |
| p38c-4      | p38c   | Rpn3   | 35176  | 17137450 | 104 |
| Vector-US-1 | Vector | Cdlc2  | 33319  | 17137630 | 80  |
| p38b-4      | p38b   | Cdlc2  | 33319  | 17137630 | 120 |
| Vector-US-1 | Vector | Rpn1   | 40174  | 21356859 | 80  |
| Vector-US-2 | Vector | Rpn1   | 40174  | 21356859 | 79  |
| Vector-US-3 | Vector | Rpn1   | 40174  | 21356859 | 82  |
| Vector-US-4 | Vector | Rpn1   | 40174  | 21356859 | 78  |
| p38a-2      | p38a   | Rpn1   | 40174  | 21356859 | 66  |

|             |        |       |       |          |     |
|-------------|--------|-------|-------|----------|-----|
| p38a-3      | p38a   | Rpn1  | 40174 | 21356859 | 85  |
| p38a-4      | p38a   | Rpn1  | 40174 | 21356859 | 86  |
| p38b-1      | p38b   | Rpn1  | 40174 | 21356859 | 113 |
| p38b-3      | p38b   | Rpn1  | 40174 | 21356859 | 112 |
| p38b-4      | p38b   | Rpn1  | 40174 | 21356859 | 134 |
| p38c-1      | p38c   | Rpn1  | 40174 | 21356859 | 126 |
| p38c-2      | p38c   | Rpn1  | 40174 | 21356859 | 76  |
| p38c-3      | p38c   | Rpn1  | 40174 | 21356859 | 177 |
| p38c-4      | p38c   | Rpn1  | 40174 | 21356859 | 141 |
| Vector-US-1 | Vector | Vha36 | 44702 | 21355551 | 80  |
| Vector-US-3 | Vector | Vha36 | 44702 | 21355551 | 104 |
| Vector-US-4 | Vector | Vha36 | 44702 | 21355551 | 89  |
| Vector-OS-1 | Vector | Vha36 | 44702 | 21355551 | 69  |
| p38a-1      | p38a   | Vha36 | 44702 | 21355551 | 87  |
| p38a-2      | p38a   | Vha36 | 44702 | 21355551 | 79  |
| p38a-3      | p38a   | Vha36 | 44702 | 21355551 | 91  |
| p38a-4      | p38a   | Vha36 | 44702 | 21355551 | 107 |
| p38b-4      | p38b   | Vha36 | 44702 | 21355551 | 75  |
| p38c-1      | p38c   | Vha36 | 44702 | 21355551 | 82  |
| p38c-2      | p38c   | Vha36 | 44702 | 21355551 | 93  |
| p38c-3      | p38c   | Vha36 | 44702 | 21355551 | 85  |
| p38c-4      | p38c   | Vha36 | 44702 | 21355551 | 177 |
| Vector-US-1 | Vector | ras   | 43873 | 24641071 | 79  |
| Vector-HS-1 | Vector | ras   | 43873 | 24641071 | 176 |
| p38c-1      | p38c   | ras   | 43873 | 24641071 | 51  |
| p38c-3      | p38c   | ras   | 43873 | 24641071 | 98  |
| p38c-4      | p38c   | ras   | 43873 | 24641071 | 59  |
| Vector-US-1 | Vector | tsr   | 37841 | 17136986 | 79  |
| Vector-US-3 | Vector | tsr   | 37841 | 17136986 | 90  |
| Vector-US-4 | Vector | tsr   | 37841 | 17136986 | 50  |
| Vector-HS-1 | Vector | tsr   | 37841 | 17136986 | 112 |
| Vector-OS-1 | Vector | tsr   | 37841 | 17136986 | 157 |
| p38a-1      | p38a   | tsr   | 37841 | 17136986 | 78  |
| p38a-2      | p38a   | tsr   | 37841 | 17136986 | 34  |
| p38a-3      | p38a   | tsr   | 37841 | 17136986 | 77  |
| p38a-4      | p38a   | tsr   | 37841 | 17136986 | 58  |
| p38b-1      | p38b   | tsr   | 37841 | 17136986 | 81  |
| p38b-2      | p38b   | tsr   | 37841 | 17136986 | 87  |
| p38b-3      | p38b   | tsr   | 37841 | 17136986 | 75  |
| p38b-4      | p38b   | tsr   | 37841 | 17136986 | 70  |
| p38c-1      | p38c   | tsr   | 37841 | 17136986 | 128 |
| p38c-2      | p38c   | tsr   | 37841 | 17136986 | 69  |
| p38c-3      | p38c   | tsr   | 37841 | 17136986 | 67  |
| p38c-4      | p38c   | tsr   | 37841 | 17136986 | 73  |
| Vector-US-1 | Vector | Ugt   | 40055 | 24666493 | 79  |
| Vector-US-2 | Vector | Ugt   | 40055 | 24666493 | 58  |
| Vector-US-3 | Vector | Ugt   | 40055 | 24666493 | 64  |

|             |        |          |       |          |     |
|-------------|--------|----------|-------|----------|-----|
| p38c-4      | p38c   | Ugt      | 40055 | 24666493 | 115 |
| Vector-US-1 | Vector | Aats-his | 32841 | 24643059 | 79  |
| Vector-US-1 | Vector | ial      | 34504 | 17137514 | 79  |
| Vector-US-1 | Vector | g        | 44819 | 24641854 | 79  |
| Vector-US-2 | Vector | g        | 44819 | 24641854 | 141 |
| Vector-US-3 | Vector | g        | 44819 | 24641854 | 140 |
| Vector-US-4 | Vector | g        | 44819 | 24641854 | 92  |
| Vector-HS-1 | Vector | g        | 44819 | 24641854 | 107 |
| Mef2-US-1   | Mef2   | g        | 44819 | 24641854 | 68  |
| p38a-2      | p38a   | g        | 44819 | 24641854 | 158 |
| p38a-3      | p38a   | g        | 44819 | 24641854 | 134 |
| p38a-4      | p38a   | g        | 44819 | 24641854 | 77  |
| p38b-2      | p38b   | g        | 44819 | 24641854 | 69  |
| p38b-3      | p38b   | g        | 44819 | 24641854 | 67  |
| p38b-4      | p38b   | g        | 44819 | 24641854 | 124 |
| p38c-1      | p38c   | g        | 44819 | 24641854 | 123 |
| p38c-2      | p38c   | g        | 44819 | 24641854 | 107 |
| p38c-3      | p38c   | g        | 44819 | 24641854 | 71  |
| p38c-4      | p38c   | g        | 44819 | 24641854 | 72  |
| Vector-US-1 | Vector | Rpt3     | 32047 | 18860063 | 78  |
| Vector-US-2 | Vector | Rpt3     | 32047 | 18860063 | 243 |
| Vector-US-3 | Vector | Rpt3     | 32047 | 18860063 | 171 |
| Vector-US-4 | Vector | Rpt3     | 32047 | 18860063 | 236 |
| Vector-HS-1 | Vector | Rpt3     | 32047 | 18860063 | 74  |
| Vector-OS-1 | Vector | Rpt3     | 32047 | 18860063 | 192 |
| Vector-OS-2 | Vector | Rpt3     | 32047 | 18860063 | 119 |
| Vector-OS-3 | Vector | Rpt3     | 32047 | 18860063 | 190 |
| Mef2-US-1   | Mef2   | Rpt3     | 32047 | 18860063 | 125 |
| Mef2-US-2   | Mef2   | Rpt3     | 32047 | 18860063 | 47  |
| p38a-1      | p38a   | Rpt3     | 32047 | 18860063 | 166 |
| p38a-2      | p38a   | Rpt3     | 32047 | 18860063 | 303 |
| p38a-3      | p38a   | Rpt3     | 32047 | 18860063 | 233 |
| p38a-4      | p38a   | Rpt3     | 32047 | 18860063 | 168 |
| p38b-2      | p38b   | Rpt3     | 32047 | 18860063 | 101 |
| p38b-3      | p38b   | Rpt3     | 32047 | 18860063 | 139 |
| p38b-4      | p38b   | Rpt3     | 32047 | 18860063 | 248 |
| p38c-1      | p38c   | Rpt3     | 32047 | 18860063 | 203 |
| p38c-2      | p38c   | Rpt3     | 32047 | 18860063 | 294 |
| p38c-3      | p38c   | Rpt3     | 32047 | 18860063 | 136 |
| p38c-4      | p38c   | Rpt3     | 32047 | 18860063 | 192 |
| Vector-US-1 | Vector | sec13    | 44437 | 21356113 | 77  |
| Vector-US-2 | Vector | sec13    | 44437 | 21356113 | 174 |
| Vector-US-3 | Vector | sec13    | 44437 | 21356113 | 92  |
| Vector-US-4 | Vector | sec13    | 44437 | 21356113 | 77  |
| Vector-HS-1 | Vector | sec13    | 44437 | 21356113 | 46  |
| Vector-OS-1 | Vector | sec13    | 44437 | 21356113 | 92  |
| p38a-2      | p38a   | sec13    | 44437 | 21356113 | 70  |

|             |        |         |       |           |     |
|-------------|--------|---------|-------|-----------|-----|
| p38a-4      | p38a   | sec13   | 44437 | 21356113  | 82  |
| p38c-4      | p38c   | sec13   | 44437 | 21356113  | 65  |
| Vector-US-1 | Vector | CG7461  | 37217 | 281363737 | 77  |
| Vector-OS-1 | Vector | CG7461  | 37217 | 281363737 | 50  |
| p38a-1      | p38a   | CG7461  | 37217 | 281363737 | 36  |
| p38c-4      | p38c   | CG7461  | 37217 | 281363737 | 224 |
| Vector-US-1 | Vector | Fib     | 37662 | 17647425  | 76  |
| Vector-US-2 | Vector | Fib     | 37662 | 17647425  | 186 |
| Vector-US-3 | Vector | Fib     | 37662 | 17647425  | 208 |
| Vector-OS-1 | Vector | Fib     | 37662 | 17647425  | 292 |
| Vector-OS-2 | Vector | Fib     | 37662 | 17647425  | 50  |
| Vector-OS-3 | Vector | Fib     | 37662 | 17647425  | 57  |
| Mef2-US-1   | Mef2   | Fib     | 37662 | 17647425  | 78  |
| Mef2-US-2   | Mef2   | Fib     | 37662 | 17647425  | 47  |
| p38a-2      | p38a   | Fib     | 37662 | 17647425  | 148 |
| p38a-3      | p38a   | Fib     | 37662 | 17647425  | 123 |
| p38b-1      | p38b   | Fib     | 37662 | 17647425  | 71  |
| p38b-3      | p38b   | Fib     | 37662 | 17647425  | 323 |
| p38b-4      | p38b   | Fib     | 37662 | 17647425  | 129 |
| p38c-1      | p38c   | Fib     | 37662 | 17647425  | 224 |
| p38c-2      | p38c   | Fib     | 37662 | 17647425  | 199 |
| p38c-3      | p38c   | Fib     | 37662 | 17647425  | 101 |
| p38c-4      | p38c   | Fib     | 37662 | 17647425  | 283 |
| Vector-US-1 | Vector | Vha26   | 40679 | 17737775  | 76  |
| Vector-US-2 | Vector | Vha26   | 40679 | 17737775  | 94  |
| Vector-US-3 | Vector | Vha26   | 40679 | 17737775  | 46  |
| p38a-1      | p38a   | Vha26   | 40679 | 17737775  | 51  |
| p38a-2      | p38a   | Vha26   | 40679 | 17737775  | 42  |
| p38c-3      | p38c   | Vha26   | 40679 | 17737775  | 163 |
| Vector-US-1 | Vector | CG11999 | 40637 | 24644197  | 76  |
| Vector-US-2 | Vector | CG11999 | 40637 | 24644197  | 101 |
| Vector-US-3 | Vector | CG11999 | 40637 | 24644197  | 97  |
| Vector-US-4 | Vector | CG11999 | 40637 | 24644197  | 87  |
| Vector-HS-1 | Vector | CG11999 | 40637 | 24644197  | 98  |
| Vector-OS-1 | Vector | CG11999 | 40637 | 24644197  | 86  |
| p38a-2      | p38a   | CG11999 | 40637 | 24644197  | 93  |
| p38c-1      | p38c   | CG11999 | 40637 | 24644197  | 92  |
| p38c-2      | p38c   | CG11999 | 40637 | 24644197  | 51  |
| p38c-4      | p38c   | CG11999 | 40637 | 24644197  | 102 |
| Vector-US-1 | Vector | CG15100 | 37177 | 24655311  | 75  |
| Vector-US-4 | Vector | CG15100 | 37177 | 24655311  | 144 |
| Vector-HS-1 | Vector | CG15100 | 37177 | 24655311  | 369 |
| Vector-OS-1 | Vector | CG15100 | 37177 | 24655311  | 735 |
| Mef2-US-2   | Mef2   | CG15100 | 37177 | 24655311  | 108 |
| p38a-2      | p38a   | CG15100 | 37177 | 24655311  | 43  |
| p38a-3      | p38a   | CG15100 | 37177 | 24655311  | 64  |
| p38c-1      | p38c   | CG15100 | 37177 | 24655311  | 90  |

|             |        |          |        |          |     |
|-------------|--------|----------|--------|----------|-----|
| p38c-2      | p38c   | CG15100  | 37177  | 24655311 | 97  |
| p38c-3      | p38c   | CG15100  | 37177  | 24655311 | 238 |
| p38c-4      | p38c   | CG15100  | 37177  | 24655311 | 74  |
| Vector-US-1 | Vector | CG9086   | 32687  | 24642697 | 75  |
| Vector-US-2 | Vector | CG9086   | 32687  | 24642697 | 70  |
| Vector-US-3 | Vector | CG9086   | 32687  | 24642697 | 61  |
| Vector-US-4 | Vector | CG9086   | 32687  | 24642697 | 75  |
| Vector-HS-1 | Vector | CG9086   | 32687  | 24642697 | 52  |
| p38a-2      | p38a   | CG9086   | 32687  | 24642697 | 66  |
| p38a-3      | p38a   | CG9086   | 32687  | 24642697 | 131 |
| p38a-4      | p38a   | CG9086   | 32687  | 24642697 | 76  |
| p38b-3      | p38b   | CG9086   | 32687  | 24642697 | 69  |
| p38c-1      | p38c   | CG9086   | 32687  | 24642697 | 72  |
| p38c-2      | p38c   | CG9086   | 32687  | 24642697 | 69  |
| p38c-3      | p38c   | CG9086   | 32687  | 24642697 | 75  |
| p38c-4      | p38c   | CG9086   | 32687  | 24642697 | 59  |
| Vector-US-1 | Vector | RpS6     | 31700  | 24640437 | 74  |
| Vector-US-3 | Vector | RpS6     | 31700  | 17737290 | 94  |
| Vector-HS-1 | Vector | RpS6     | 31700  | 17737290 | 72  |
| Vector-OS-1 | Vector | RpS6     | 31700  | 24640437 | 172 |
| Vector-OS-2 | Vector | RpS6     | 31700  | 17737290 | 76  |
| p38a-1      | p38a   | RpS6     | 31700  | 17737290 | 48  |
| p38a-4      | p38a   | RpS6     | 31700  | 17737290 | 74  |
| p38b-2      | p38b   | RpS6     | 31700  | 17737290 | 73  |
| p38c-1      | p38c   | RpS6     | 31700  | 17737290 | 92  |
| p38c-2      | p38c   | RpS6     | 31700  | 17737290 | 84  |
| p38c-3      | p38c   | RpS6     | 31700  | 17737290 | 91  |
| p38c-4      | p38c   | RpS6     | 31700  | 17737290 | 83  |
| Vector-US-1 | Vector | CG8632   | 36393  | 24653141 | 74  |
| Vector-US-4 | Vector | CG8632   | 36393  | 24653141 | 48  |
| Vector-OS-2 | Vector | CG8632   | 36393  | 24653141 | 48  |
| p38c-4      | p38c   | CG8632   | 36393  | 24653141 | 51  |
| Vector-US-1 | Vector | CG7911   | 43559  | 24651247 | 73  |
| p38a-2      | p38a   | CG7911   | 43559  | 24651247 | 118 |
| Vector-US-1 | Vector | UGP      | 39065  | 62484278 | 73  |
| p38c-3      | p38c   | UGP      | 39065  | 62484278 | 75  |
| Vector-US-1 | Vector | trio     | 43974  | 24654944 | 73  |
| Vector-US-1 | Vector | Tudor-SN | 38045  | 20130403 | 73  |
| Vector-HS-1 | Vector | Tudor-SN | 38045  | 20130403 | 102 |
| Vector-OS-1 | Vector | Tudor-SN | 38045  | 20130403 | 310 |
| Vector-OS-2 | Vector | Tudor-SN | 38045  | 20130403 | 64  |
| p38a-1      | p38a   | Tudor-SN | 38045  | 20130403 | 41  |
| p38c-4      | p38c   | Tudor-SN | 38045  | 20130403 | 50  |
| Vector-US-1 | Vector | twf      | 41719  | 21358413 | 73  |
| Vector-US-1 | Vector | Cct1     | 117353 | 21357575 | 72  |
| Vector-US-1 | Vector | Rpn12    | 39845  | 21357229 | 72  |
| Vector-US-2 | Vector | Rpn12    | 39845  | 21357229 | 143 |

|             |        |        |       |          |     |
|-------------|--------|--------|-------|----------|-----|
| Vector-US-3 | Vector | Rpn12  | 39845 | 21357229 | 175 |
| Vector-US-4 | Vector | Rpn12  | 39845 | 21357229 | 158 |
| Vector-HS-1 | Vector | Rpn12  | 39845 | 21357229 | 81  |
| Vector-OS-1 | Vector | Rpn12  | 39845 | 21357229 | 140 |
| Vector-OS-3 | Vector | Rpn12  | 39845 | 21357229 | 52  |
| Mef2-US-2   | Mef2   | Rpn12  | 39845 | 21357229 | 68  |
| p38a-1      | p38a   | Rpn12  | 39845 | 21357229 | 34  |
| p38a-2      | p38a   | Rpn12  | 39845 | 21357229 | 109 |
| p38a-3      | p38a   | Rpn12  | 39845 | 21357229 | 46  |
| p38a-4      | p38a   | Rpn12  | 39845 | 21357229 | 87  |
| p38b-3      | p38b   | Rpn12  | 39845 | 21357229 | 153 |
| p38b-4      | p38b   | Rpn12  | 39845 | 21357229 | 116 |
| p38c-2      | p38c   | Rpn12  | 39845 | 21357229 | 142 |
| p38c-3      | p38c   | Rpn12  | 39845 | 21357229 | 66  |
| p38c-4      | p38c   | Rpn12  | 39845 | 21357229 | 183 |
| Vector-US-1 | Vector | CG4069 | 39437 | 21355333 | 72  |
| Vector-US-2 | Vector | CG4069 | 39437 | 21355333 | 80  |
| Vector-US-3 | Vector | CG4069 | 39437 | 21355333 | 77  |
| Vector-US-4 | Vector | CG4069 | 39437 | 21355333 | 96  |
| Vector-OS-3 | Vector | CG4069 | 39437 | 21355333 | 61  |
| p38a-2      | p38a   | CG4069 | 39437 | 21355333 | 69  |
| p38a-3      | p38a   | CG4069 | 39437 | 21355333 | 95  |
| p38a-4      | p38a   | CG4069 | 39437 | 21355333 | 77  |
| p38b-3      | p38b   | CG4069 | 39437 | 21355333 | 78  |
| p38b-4      | p38b   | CG4069 | 39437 | 21355333 | 85  |
| p38c-1      | p38c   | CG4069 | 39437 | 21355333 | 83  |
| p38c-2      | p38c   | CG4069 | 39437 | 21355333 | 92  |
| p38c-3      | p38c   | CG4069 | 39437 | 21355333 | 79  |
| p38c-4      | p38c   | CG4069 | 39437 | 21355333 | 85  |
| Vector-US-1 | Vector | CG8142 | 32763 | 18859927 | 72  |
| Vector-HS-1 | Vector | CG8142 | 32763 | 18859927 | 98  |
| p38c-4      | p38c   | CG8142 | 32763 | 18859927 | 92  |
| Vector-US-1 | Vector | sip2   | 33979 | 45550941 | 72  |
| Vector-US-2 | Vector | sip2   | 33979 | 24582383 | 55  |
| p38c-1      | p38c   | sip2   | 33979 | 45550941 | 52  |
| p38c-3      | p38c   | sip2   | 33979 | 45550941 | 80  |
| p38c-4      | p38c   | sip2   | 33979 | 45550941 | 46  |
| Vector-US-1 | Vector | CG7945 | 39679 | 24664648 | 72  |
| Vector-US-4 | Vector | CG7945 | 39679 | 24664648 | 88  |
| p38a-2      | p38a   | CG7945 | 39679 | 24664648 | 90  |
| p38a-3      | p38a   | CG7945 | 39679 | 24664648 | 83  |
| p38a-4      | p38a   | CG7945 | 39679 | 24664648 | 86  |
| p38b-3      | p38b   | CG7945 | 39679 | 24664648 | 82  |
| p38b-4      | p38b   | CG7945 | 39679 | 24664648 | 122 |
| p38c-1      | p38c   | CG7945 | 39679 | 24664648 | 100 |
| p38c-2      | p38c   | CG7945 | 39679 | 24664648 | 107 |
| p38c-3      | p38c   | CG7945 | 39679 | 24664648 | 96  |

|             |        |            |       |          |     |
|-------------|--------|------------|-------|----------|-----|
| p38c-4      | p38c   | CG7945     | 39679 | 24664648 | 96  |
| Vector-US-1 | Vector | Prosalpha1 | 45780 | 24586400 | 72  |
| Vector-US-2 | Vector | Prosalpha1 | 45780 | 24586400 | 189 |
| Vector-US-3 | Vector | Prosalpha1 | 45780 | 24586400 | 154 |
| Vector-US-4 | Vector | Prosalpha1 | 45780 | 24586400 | 114 |
| Vector-HS-1 | Vector | Prosalpha1 | 45780 | 24586400 | 65  |
| p38a-2      | p38a   | Prosalpha1 | 45780 | 24586400 | 96  |
| p38a-3      | p38a   | Prosalpha1 | 45780 | 24586400 | 103 |
| p38a-4      | p38a   | Prosalpha1 | 45780 | 24586400 | 159 |
| p38b-1      | p38b   | Prosalpha1 | 45780 | 24586400 | 43  |
| p38c-3      | p38c   | Prosalpha1 | 45780 | 24586400 | 207 |
| p38c-4      | p38c   | Prosalpha1 | 45780 | 24586400 | 172 |
| Vector-US-1 | Vector | CG6259     | 39964 | 21355253 | 71  |
| Vector-US-1 | Vector | Aats-arg   | 32539 | 18859963 | 71  |
| Vector-US-2 | Vector | Aats-arg   | 32539 | 18859963 | 48  |
| Vector-US-3 | Vector | Aats-arg   | 32539 | 18859963 | 126 |
| Vector-US-4 | Vector | Aats-arg   | 32539 | 18859963 | 50  |
| Vector-OS-1 | Vector | Aats-arg   | 32539 | 18859963 | 173 |
| p38a-2      | p38a   | Aats-arg   | 32539 | 18859963 | 75  |
| p38b-4      | p38b   | Aats-arg   | 32539 | 18859963 | 62  |
| p38c-2      | p38c   | Aats-arg   | 32539 | 18859963 | 179 |
| p38c-3      | p38c   | Aats-arg   | 32539 | 18859963 | 116 |
| p38c-4      | p38c   | Aats-arg   | 32539 | 18859963 | 58  |
| Vector-US-1 | Vector | gro        | 43162 | 24650235 | 70  |
| Vector-US-1 | Vector | CG11858    | 43044 | 21356303 | 70  |
| Vector-US-2 | Vector | CG11858    | 43044 | 21356303 | 118 |
| Vector-US-3 | Vector | CG11858    | 43044 | 21356303 | 79  |
| Vector-US-4 | Vector | CG11858    | 43044 | 21356303 | 62  |
| Vector-HS-1 | Vector | CG11858    | 43044 | 21356303 | 54  |
| Vector-OS-1 | Vector | CG11858    | 43044 | 21356303 | 80  |
| Mef2-US-1   | Mef2   | CG11858    | 43044 | 21356303 | 71  |
| p38a-1      | p38a   | CG11858    | 43044 | 21356303 | 68  |
| p38a-2      | p38a   | CG11858    | 43044 | 21356303 | 78  |
| p38a-3      | p38a   | CG11858    | 43044 | 21356303 | 74  |
| p38a-4      | p38a   | CG11858    | 43044 | 21356303 | 68  |
| p38c-1      | p38c   | CG11858    | 43044 | 21356303 | 77  |
| p38c-2      | p38c   | CG11858    | 43044 | 21356303 | 65  |
| Vector-US-1 | Vector | sta        | 31106 | 17136518 | 70  |
| Vector-US-2 | Vector | sta        | 31106 | 17136518 | 192 |
| Vector-US-3 | Vector | sta        | 31106 | 17136518 | 192 |
| Vector-US-4 | Vector | sta        | 31106 | 17136518 | 232 |
| Vector-HS-1 | Vector | sta        | 31106 | 17136518 | 108 |
| Vector-OS-1 | Vector | sta        | 31106 | 17136518 | 242 |
| Vector-OS-3 | Vector | sta        | 31106 | 17136518 | 63  |
| Mef2-US-1   | Mef2   | sta        | 31106 | 17136518 | 64  |
| p38a-2      | p38a   | sta        | 31106 | 17136518 | 99  |
| p38a-3      | p38a   | sta        | 31106 | 17136518 | 172 |



|             |        |         |       |          |     |
|-------------|--------|---------|-------|----------|-----|
| p38b-1      | p38b   | sta     | 31106 | 17136518 | 90  |
| p38b-3      | p38b   | sta     | 31106 | 17136518 | 203 |
| p38b-4      | p38b   | sta     | 31106 | 17136518 | 138 |
| p38c-1      | p38c   | sta     | 31106 | 17136518 | 158 |
| p38c-2      | p38c   | sta     | 31106 | 17136518 | 222 |
| p38c-3      | p38c   | sta     | 31106 | 17136518 | 185 |
| p38c-4      | p38c   | sta     | 31106 | 17136518 | 188 |
| Vector-US-1 | Vector | CG5325  | 34630 | 24583827 | 69  |
| Vector-US-1 | Vector | CG5384  | 34387 | 24583343 | 69  |
| Vector-US-2 | Vector | CG5384  | 34387 | 24583343 | 158 |
| Vector-US-4 | Vector | CG5384  | 34387 | 24583343 | 81  |
| Vector-HS-1 | Vector | CG5384  | 34387 | 24583343 | 149 |
| Vector-OS-1 | Vector | CG5384  | 34387 | 24583343 | 94  |
| p38b-2      | p38b   | CG5384  | 34387 | 24583343 | 48  |
| p38c-1      | p38c   | CG5384  | 34387 | 24583343 | 48  |
| p38c-3      | p38c   | CG5384  | 34387 | 24583343 | 94  |
| p38c-4      | p38c   | CG5384  | 34387 | 24583343 | 83  |
| Vector-US-1 | Vector | CG8235  | 35892 | 24651924 | 68  |
| Vector-US-4 | Vector | CG8235  | 35892 | 24651924 | 116 |
| Vector-OS-3 | Vector | CG8235  | 35892 | 24651924 | 59  |
| Mef2-US-1   | Mef2   | CG8235  | 35892 | 24651924 | 76  |
| p38a-2      | p38a   | CG8235  | 35892 | 24651924 | 56  |
| p38b-2      | p38b   | CG8235  | 35892 | 24651924 | 88  |
| p38b-3      | p38b   | CG8235  | 35892 | 24651924 | 62  |
| p38b-4      | p38b   | CG8235  | 35892 | 24651924 | 115 |
| p38c-1      | p38c   | CG8235  | 35892 | 24651924 | 108 |
| p38c-2      | p38c   | CG8235  | 35892 | 24651924 | 132 |
| p38c-3      | p38c   | CG8235  | 35892 | 24651924 | 125 |
| p38c-4      | p38c   | CG8235  | 35892 | 24651924 | 90  |
| Vector-US-1 | Vector | CG1115  | 40624 | 21356083 | 68  |
| p38c-2      | p38c   | CG1115  | 40624 | 21356083 | 57  |
| Vector-US-1 | Vector | Trip1   | 33710 | 17648041 | 67  |
| Vector-US-2 | Vector | Trip1   | 33710 | 17648041 | 197 |
| Vector-US-3 | Vector | Trip1   | 33710 | 17648041 | 178 |
| Vector-US-4 | Vector | Trip1   | 33710 | 17648041 | 121 |
| Vector-HS-1 | Vector | Trip1   | 33710 | 17648041 | 68  |
| Vector-OS-1 | Vector | Trip1   | 33710 | 17648041 | 177 |
| Mef2-US-2   | Mef2   | Trip1   | 33710 | 17648041 | 49  |
| p38a-3      | p38a   | Trip1   | 33710 | 17648041 | 89  |
| p38a-4      | p38a   | Trip1   | 33710 | 17648041 | 127 |
| p38c-2      | p38c   | Trip1   | 33710 | 17648041 | 74  |
| p38c-4      | p38c   | Trip1   | 33710 | 17648041 | 91  |
| Vector-US-1 | Vector | Hsc70-5 | 36583 | 24653595 | 67  |
| Vector-US-2 | Vector | Hsc70-5 | 36583 | 24653595 | 451 |
| Vector-US-4 | Vector | Hsc70-5 | 36583 | 24653595 | 217 |
| Vector-OS-1 | Vector | Hsc70-5 | 36583 | 24653595 | 278 |
| Vector-OS-2 | Vector | Hsc70-5 | 36583 | 24653595 | 47  |

|             |        |            |        |          |     |
|-------------|--------|------------|--------|----------|-----|
| Mef2-US-1   | Mef2   | Hsc70-5    | 36583  | 24653595 | 486 |
| Mef2-US-2   | Mef2   | Hsc70-5    | 36583  | 24653595 | 700 |
| p38a-1      | p38a   | Hsc70-5    | 36583  | 24653595 | 151 |
| p38a-2      | p38a   | Hsc70-5    | 36583  | 24653595 | 66  |
| p38a-3      | p38a   | Hsc70-5    | 36583  | 24653595 | 125 |
| p38a-4      | p38a   | Hsc70-5    | 36583  | 24653595 | 119 |
| p38b-1      | p38b   | Hsc70-5    | 36583  | 24653595 | 37  |
| p38c-2      | p38c   | Hsc70-5    | 36583  | 24653595 | 50  |
| p38c-4      | p38c   | Hsc70-5    | 36583  | 24653595 | 105 |
| Vector-US-1 | Vector | Tango5     | 326232 | 24641079 | 66  |
| Vector-US-2 | Vector | Tango5     | 326232 | 24641079 | 112 |
| Vector-US-3 | Vector | Tango5     | 326232 | 24641079 | 107 |
| Vector-OS-1 | Vector | Tango5     | 326232 | 24641079 | 61  |
| Vector-US-1 | Vector | dgt6       | 43441  | 21358161 | 65  |
| Vector-US-1 | Vector | RpL7       | 34352  | 24583248 | 65  |
| Vector-US-2 | Vector | RpL7       | 34352  | 24583248 | 66  |
| Vector-US-4 | Vector | RpL7       | 34352  | 24583248 | 61  |
| Vector-HS-1 | Vector | RpL7       | 34352  | 24583248 | 47  |
| p38a-2      | p38a   | RpL7       | 34352  | 24583248 | 63  |
| Vector-US-1 | Vector | Cortactin  | 42491  | 24648611 | 65  |
| Vector-US-1 | Vector | cindr      | 43654  | 28571934 | 64  |
| Vector-HS-1 | Vector | cindr      | 43654  | 28571934 | 56  |
| Vector-OS-1 | Vector | cindr      | 43654  | 28571936 | 201 |
| Vector-OS-2 | Vector | cindr      | 43654  | 28571936 | 79  |
| p38a-4      | p38a   | cindr      | 43654  | 28571936 | 54  |
| Vector-US-1 | Vector | CG5642     | 39386  | 21358039 | 64  |
| Vector-US-2 | Vector | CG5642     | 39386  | 21358039 | 194 |
| Vector-US-3 | Vector | CG5642     | 39386  | 21358039 | 131 |
| Vector-US-4 | Vector | CG5642     | 39386  | 21358039 | 241 |
| Vector-HS-1 | Vector | CG5642     | 39386  | 21358039 | 104 |
| Vector-OS-1 | Vector | CG5642     | 39386  | 21358039 | 81  |
| p38a-2      | p38a   | CG5642     | 39386  | 21358039 | 54  |
| p38a-4      | p38a   | CG5642     | 39386  | 21358039 | 63  |
| p38b-4      | p38b   | CG5642     | 39386  | 21358039 | 54  |
| p38c-1      | p38c   | CG5642     | 39386  | 21358039 | 86  |
| p38c-2      | p38c   | CG5642     | 39386  | 21358039 | 135 |
| p38c-3      | p38c   | CG5642     | 39386  | 21358039 | 104 |
| p38c-4      | p38c   | CG5642     | 39386  | 21358039 | 95  |
| Vector-US-1 | Vector | SNF4Agamma | 42515  | 24648645 | 63  |
| Vector-HS-1 | Vector | SNF4Agamma | 42515  | 24648645 | 50  |
| p38c-1      | p38c   | SNF4Agamma | 42515  | 24648645 | 71  |
| p38c-2      | p38c   | SNF4Agamma | 42515  | 24648645 | 113 |
| p38c-3      | p38c   | SNF4Agamma | 42515  | 24648645 | 58  |
| p38c-4      | p38c   | SNF4Agamma | 42515  | 24648645 | 84  |
| Vector-US-1 | Vector | CG8149     | 41137  | 21355863 | 63  |
| Vector-US-1 | Vector | iPLA2-VIA  | 39160  | 45550585 | 62  |
| p38a-2      | p38a   | iPLA2-VIA  | 39160  | 45550585 | 32  |

|             |        |           |       |          |     |
|-------------|--------|-----------|-------|----------|-----|
| p38c-3      | p38c   | iPLA2-VIA | 39160 | 45550585 | 162 |
| p38c-4      | p38c   | iPLA2-VIA | 39160 | 45550585 | 80  |
| Vector-US-1 | Vector | CG8552    | 34109 | 20129359 | 61  |
| Vector-OS-1 | Vector | CG8552    | 34109 | 20129359 | 84  |
| p38a-1      | p38a   | CG8552    | 34109 | 20129359 | 42  |
| Vector-US-1 | Vector | RpS10b    | 32953 | 19920344 | 61  |
| Vector-US-2 | Vector | RpS10b    | 32953 | 19920344 | 96  |
| Vector-US-3 | Vector | RpS10b    | 32953 | 19920344 | 140 |
| Vector-US-4 | Vector | RpS10b    | 32953 | 19920344 | 86  |
| Vector-HS-1 | Vector | RpS10b    | 32953 | 19920344 | 139 |
| Vector-OS-1 | Vector | RpS10b    | 32953 | 19920344 | 69  |
| Mef2-US-1   | Mef2   | RpS10b    | 32953 | 19920344 | 64  |
| Mef2-US-2   | Mef2   | RpS10b    | 32953 | 19920344 | 69  |
| p38a-1      | p38a   | RpS10b    | 32953 | 19920344 | 83  |
| p38a-2      | p38a   | RpS10b    | 32953 | 19920344 | 55  |
| p38a-3      | p38a   | RpS10b    | 32953 | 19920344 | 70  |
| p38a-4      | p38a   | RpS10b    | 32953 | 19920344 | 102 |
| p38b-1      | p38b   | RpS10b    | 32953 | 19920344 | 72  |
| p38c-1      | p38c   | RpS10b    | 32953 | 19920344 | 89  |
| p38c-2      | p38c   | RpS10b    | 32953 | 19920344 | 128 |
| p38c-3      | p38c   | RpS10b    | 32953 | 19920344 | 59  |
| p38c-4      | p38c   | RpS10b    | 32953 | 19920344 | 94  |
| Vector-US-1 | Vector | PNUTS     | 33270 | 62471401 | 61  |
| Vector-OS-1 | Vector | PNUTS     | 33270 | 62471401 | 64  |
| p38a-2      | p38a   | PNUTS     | 33270 | 62471399 | 63  |
| p38c-3      | p38c   | PNUTS     | 33270 | 62471401 | 51  |
| p38c-4      | p38c   | PNUTS     | 33270 | 62471401 | 60  |
| Vector-US-1 | Vector | CG1440    | 31776 | 24640588 | 61  |
| p38a-1      | p38a   | CG1440    | 31776 | 24640588 | 76  |
| p38a-3      | p38a   | CG1440    | 31776 | 24640588 | 59  |
| Vector-US-1 | Vector | Prosbeta2 | 39628 | 24664391 | 60  |
| Vector-US-3 | Vector | Prosbeta2 | 39628 | 24664391 | 105 |
| Vector-US-4 | Vector | Prosbeta2 | 39628 | 24664391 | 91  |
| Vector-OS-1 | Vector | Prosbeta2 | 39628 | 24664391 | 60  |
| p38a-2      | p38a   | Prosbeta2 | 39628 | 24664391 | 37  |
| p38a-4      | p38a   | Prosbeta2 | 39628 | 24664391 | 112 |
| p38b-1      | p38b   | Prosbeta2 | 39628 | 24664391 | 54  |
| p38c-3      | p38c   | Prosbeta2 | 39628 | 24664391 | 85  |
| Vector-US-1 | Vector | Sod2      | 36878 | 17136812 | 60  |
| Vector-US-1 | Vector | Strn-Mlck | 36753 | 24653966 | 60  |
| Vector-US-1 | Vector | 2-Sep     | 42438 | 17738071 | 59  |
| Vector-US-4 | Vector | 2-Sep     | 42438 | 17738071 | 69  |
| Vector-OS-3 | Vector | 2-Sep     | 42438 | 17738071 | 72  |
| p38b-3      | p38b   | 2-Sep     | 42438 | 17738071 | 111 |
| p38b-4      | p38b   | 2-Sep     | 42438 | 17738071 | 88  |
| p38c-1      | p38c   | 2-Sep     | 42438 | 17738071 | 63  |
| p38c-2      | p38c   | 2-Sep     | 42438 | 17738071 | 64  |

|             |        |        |       |          |     |
|-------------|--------|--------|-------|----------|-----|
| p38c-3      | p38c   | 2-Sep  | 42438 | 17738071 | 67  |
| Vector-US-1 | Vector | Sgt    | 35052 | 24584835 | 58  |
| Vector-US-1 | Vector | Rm62   | 40739 | 24644479 | 58  |
| Vector-US-2 | Vector | Rm62   | 40739 | 24644479 | 755 |
| Vector-US-3 | Vector | Rm62   | 40739 | 24644479 | 649 |
| Vector-US-4 | Vector | Rm62   | 40739 | 24644479 | 620 |
| Vector-HS-1 | Vector | Rm62   | 40739 | 24644479 | 261 |
| Vector-OS-1 | Vector | Rm62   | 40739 | 24644481 | 692 |
| Vector-OS-2 | Vector | Rm62   | 40739 | 24644479 | 58  |
| Vector-OS-3 | Vector | Rm62   | 40739 | 24644479 | 91  |
| Mef2-US-1   | Mef2   | Rm62   | 40739 | 24644479 | 206 |
| Mef2-US-2   | Mef2   | Rm62   | 40739 | 24644479 | 119 |
| p38a-1      | p38a   | Rm62   | 40739 | 24644479 | 460 |
| p38a-2      | p38a   | Rm62   | 40739 | 24644479 | 640 |
| p38a-3      | p38a   | Rm62   | 40739 | 24644479 | 575 |
| p38a-4      | p38a   | Rm62   | 40739 | 24644479 | 531 |
| p38b-1      | p38b   | Rm62   | 40739 | 24644479 | 170 |
| p38b-3      | p38b   | Rm62   | 40739 | 24644479 | 111 |
| p38b-4      | p38b   | Rm62   | 40739 | 24644479 | 133 |
| p38c-1      | p38c   | Rm62   | 40739 | 24644479 | 391 |
| p38c-2      | p38c   | Rm62   | 40739 | 24644479 | 431 |
| p38c-3      | p38c   | Rm62   | 40739 | 24644479 | 284 |
| p38c-4      | p38c   | Rm62   | 40739 | 24644479 | 689 |
| Vector-US-1 | Vector | CycT   | 39961 | 24666004 | 58  |
| Vector-US-2 | Vector | CycT   | 39961 | 24666004 | 59  |
| Vector-US-4 | Vector | CycT   | 39961 | 24666004 | 112 |
| Vector-OS-1 | Vector | CycT   | 39961 | 24666004 | 109 |
| p38c-3      | p38c   | CycT   | 39961 | 24666004 | 62  |
| Vector-US-1 | Vector | CG3902 | 40059 | 24666513 | 57  |
| Vector-US-1 | Vector | rept   | 40092 | 17737635 | 57  |
| Vector-US-2 | Vector | rept   | 40092 | 17737635 | 47  |
| Vector-OS-1 | Vector | rept   | 40092 | 17737635 | 54  |
| p38a-4      | p38a   | rept   | 40092 | 17737635 | 97  |
| p38b-3      | p38b   | rept   | 40092 | 17737635 | 46  |
| p38c-2      | p38c   | rept   | 40092 | 17737635 | 90  |
| p38c-3      | p38c   | rept   | 40092 | 17737635 | 107 |
| p38c-4      | p38c   | rept   | 40092 | 17737635 | 126 |
| Vector-US-1 | Vector | fs(1)h | 31722 | 24640482 | 56  |
| Vector-US-1 | Vector | Mov34  | 37894 | 24762618 | 56  |
| Vector-US-3 | Vector | Mov34  | 37894 | 24762618 | 99  |
| p38a-1      | p38a   | Mov34  | 37894 | 24762618 | 79  |
| p38a-2      | p38a   | Mov34  | 37894 | 24762618 | 44  |
| p38b-2      | p38b   | Mov34  | 37894 | 24762618 | 46  |
| p38b-3      | p38b   | Mov34  | 37894 | 24762618 | 66  |
| p38b-4      | p38b   | Mov34  | 37894 | 24762618 | 122 |
| p38c-1      | p38c   | Mov34  | 37894 | 24762618 | 107 |
| p38c-2      | p38c   | Mov34  | 37894 | 24762618 | 87  |

|             |        |          |       |          |     |
|-------------|--------|----------|-------|----------|-----|
| p38c-3      | p38c   | Mov34    | 37894 | 24762618 | 88  |
| p38c-4      | p38c   | Mov34    | 37894 | 24762618 | 131 |
| Vector-US-1 | Vector | Rad23    | 43785 | 24638591 | 56  |
| Vector-OS-2 | Vector | Rad23    | 43785 | 24638591 | 79  |
| Vector-US-1 | Vector | Aats-lys | 31904 | 24640849 | 56  |
| Vector-US-3 | Vector | Aats-lys | 31904 | 24640849 | 106 |
| Vector-US-4 | Vector | Aats-lys | 31904 | 24640849 | 122 |
| Vector-HS-1 | Vector | Aats-lys | 31904 | 24640849 | 99  |
| Vector-OS-1 | Vector | Aats-lys | 31904 | 24640851 | 408 |
| Mef2-US-2   | Mef2   | Aats-lys | 31904 | 24640849 | 129 |
| p38a-2      | p38a   | Aats-lys | 31904 | 24640849 | 38  |
| p38c-1      | p38c   | Aats-lys | 31904 | 24640849 | 76  |
| p38c-2      | p38c   | Aats-lys | 31904 | 24640849 | 67  |
| Vector-US-1 | Vector | GM130    | 37524 | 24657676 | 55  |
| Vector-OS-1 | Vector | GM130    | 37524 | 24657676 | 81  |
| Vector-US-1 | Vector | prtp     | 32124 | 18859803 | 55  |
| Vector-OS-1 | Vector | prtp     | 32124 | 18859803 | 58  |
| Vector-OS-3 | Vector | prtp     | 32124 | 18859803 | 45  |
| p38a-4      | p38a   | prtp     | 32124 | 18859803 | 60  |
| p38c-1      | p38c   | prtp     | 32124 | 18859803 | 91  |
| p38c-2      | p38c   | prtp     | 32124 | 18859803 | 92  |
| p38c-3      | p38c   | prtp     | 32124 | 18859803 | 95  |
| p38c-4      | p38c   | prtp     | 32124 | 18859803 | 62  |
| Vector-US-1 | Vector | Bre1     | 38652 | 24658707 | 54  |
| Vector-US-1 | Vector | CG14346  | 33325 | 20129153 | 54  |
| Vector-US-1 | Vector | CG9302   | 34750 | 24584105 | 54  |
| Vector-US-2 | Vector | CG9302   | 34750 | 24584105 | 238 |
| Vector-US-3 | Vector | CG9302   | 34750 | 24584105 | 167 |
| Vector-US-4 | Vector | CG9302   | 34750 | 24584105 | 181 |
| Vector-HS-1 | Vector | CG9302   | 34750 | 24584105 | 94  |
| Vector-OS-1 | Vector | CG9302   | 34750 | 24584105 | 365 |
| Vector-OS-2 | Vector | CG9302   | 34750 | 24584105 | 62  |
| Vector-OS-3 | Vector | CG9302   | 34750 | 24584105 | 99  |
| Mef2-US-1   | Mef2   | CG9302   | 34750 | 24584105 | 107 |
| Mef2-US-2   | Mef2   | CG9302   | 34750 | 24584105 | 66  |
| p38a-1      | p38a   | CG9302   | 34750 | 24584105 | 295 |
| p38a-2      | p38a   | CG9302   | 34750 | 24584105 | 233 |
| p38a-3      | p38a   | CG9302   | 34750 | 24584105 | 68  |
| p38a-4      | p38a   | CG9302   | 34750 | 24584105 | 297 |
| p38b-2      | p38b   | CG9302   | 34750 | 24584105 | 84  |
| p38c-1      | p38c   | CG9302   | 34750 | 24584105 | 131 |
| p38c-2      | p38c   | CG9302   | 34750 | 24584105 | 198 |
| p38c-3      | p38c   | CG9302   | 34750 | 24584105 | 61  |
| p38c-4      | p38c   | CG9302   | 34750 | 24584105 | 155 |
| Vector-US-1 | Vector | RpS20    | 42464 | 17738077 | 53  |
| Vector-US-2 | Vector | RpS20    | 42464 | 17738077 | 90  |
| Vector-US-3 | Vector | RpS20    | 42464 | 17738077 | 101 |

|             |        |         |         |          |     |
|-------------|--------|---------|---------|----------|-----|
| Vector-US-4 | Vector | RpS20   | 42464   | 17738077 | 105 |
| Vector-HS-1 | Vector | RpS20   | 42464   | 17738077 | 101 |
| Vector-OS-1 | Vector | RpS20   | 42464   | 17738077 | 105 |
| p38a-2      | p38a   | RpS20   | 42464   | 17738077 | 78  |
| p38a-3      | p38a   | RpS20   | 42464   | 17738077 | 95  |
| p38b-1      | p38b   | RpS20   | 42464   | 17738077 | 70  |
| p38b-3      | p38b   | RpS20   | 42464   | 17738077 | 52  |
| p38b-4      | p38b   | RpS20   | 42464   | 17738077 | 54  |
| p38c-1      | p38c   | RpS20   | 42464   | 17738077 | 105 |
| p38c-2      | p38c   | RpS20   | 42464   | 17738077 | 64  |
| p38c-3      | p38c   | RpS20   | 42464   | 17738077 | 72  |
| p38c-4      | p38c   | RpS20   | 42464   | 17738077 | 64  |
| Vector-US-1 | Vector | Rpb5    | 36160   | 19922004 | 53  |
| Vector-US-4 | Vector | Rpb5    | 36160   | 19922004 | 82  |
| p38c-2      | p38c   | Rpb5    | 36160   | 19922004 | 88  |
| p38c-3      | p38c   | Rpb5    | 36160   | 19922004 | 95  |
| Vector-US-1 | Vector | CG17168 | 3354996 | 62862214 | 53  |
| Vector-US-2 | Vector | CG17168 | 3354996 | 62862214 | 53  |
| Vector-US-3 | Vector | CG17168 | 3354996 | 62862214 | 49  |
| Vector-OS-1 | Vector | CG17168 | 3354996 | 62862214 | 46  |
| p38a-2      | p38a   | CG17168 | 3354996 | 62862214 | 53  |
| p38a-3      | p38a   | CG17168 | 3354996 | 62862214 | 63  |
| p38a-4      | p38a   | CG17168 | 3354996 | 62862214 | 53  |
| Vector-US-1 | Vector | DppIII  | 40996   | 24645047 | 53  |
| p38c-4      | p38c   | DppIII  | 40996   | 24645047 | 48  |
| Vector-US-1 | Vector | Su(fu)  | 41565   | 24646369 | 52  |
| Vector-US-3 | Vector | Su(fu)  | 41565   | 24646369 | 91  |
| p38a-1      | p38a   | Su(fu)  | 41565   | 24646369 | 119 |
| p38a-2      | p38a   | Su(fu)  | 41565   | 24646369 | 125 |
| Vector-US-1 | Vector | CG3415  | 32582   | 18859837 | 52  |
| Vector-US-1 | Vector | dUTPase | 34529   | 19921126 | 52  |
| Vector-US-1 | Vector | CG5844  | 41533   | 21357171 | 51  |
| Vector-US-1 | Vector | CG33722 | 3772658 | 78706698 | 51  |
| Vector-US-1 | Vector | NUCB1   | 39978   | 24666096 | 50  |
| Vector-US-2 | Vector | NUCB1   | 39978   | 24666096 | 271 |
| Vector-US-3 | Vector | NUCB1   | 39978   | 24666096 | 161 |
| Vector-OS-1 | Vector | NUCB1   | 39978   | 24666096 | 50  |
| p38a-1      | p38a   | NUCB1   | 39978   | 24666096 | 92  |
| p38c-1      | p38c   | NUCB1   | 39978   | 24666096 | 52  |
| p38c-4      | p38c   | NUCB1   | 39978   | 24666096 | 55  |
| Vector-US-1 | Vector | CG5174  | 37117   | 24655017 | 50  |
| Vector-US-2 | Vector | CG5174  | 37117   | 24655017 | 49  |
| Vector-US-4 | Vector | CG5174  | 37117   | 24655017 | 88  |
| Vector-HS-1 | Vector | CG5174  | 37117   | 24655017 | 46  |
| Vector-OS-1 | Vector | CG5174  | 37117   | 24655017 | 178 |
| p38a-1      | p38a   | CG5174  | 37117   | 24655026 | 31  |
| Vector-US-1 | Vector | CG14438 | 31615   | 24640211 | 50  |

|             |        |         |        |          |     |
|-------------|--------|---------|--------|----------|-----|
| Vector-US-1 | Vector | pyd3    | 40916  | 21358471 | 50  |
| Vector-US-4 | Vector | pyd3    | 40916  | 21358471 | 99  |
| p38a-2      | p38a   | pyd3    | 40916  | 21358471 | 49  |
| p38c-2      | p38c   | pyd3    | 40916  | 21358471 | 50  |
| Vector-US-1 | Vector | vig     | 34885  | 17737419 | 49  |
| Vector-US-2 | Vector | vig     | 34885  | 17737419 | 72  |
| Vector-US-3 | Vector | vig     | 34885  | 17737419 | 165 |
| Vector-HS-1 | Vector | vig     | 34885  | 17737419 | 100 |
| Vector-OS-1 | Vector | vig     | 34885  | 17737419 | 294 |
| Mef2-US-1   | Mef2   | vig     | 34885  | 17737419 | 57  |
| Mef2-US-2   | Mef2   | vig     | 34885  | 17737419 | 78  |
| p38a-4      | p38a   | vig     | 34885  | 17737419 | 47  |
| p38b-1      | p38b   | vig     | 34885  | 17737419 | 55  |
| p38b-3      | p38b   | vig     | 34885  | 17737419 | 56  |
| p38c-2      | p38c   | vig     | 34885  | 17737419 | 106 |
| p38c-4      | p38c   | vig     | 34885  | 17737419 | 90  |
| Vector-US-1 | Vector | Srp54k  | 38593  | 17647949 | 49  |
| p38a-4      | p38a   | Srp54k  | 38593  | 17647949 | 55  |
| p38b-2      | p38b   | Srp54k  | 38593  | 17647949 | 68  |
| Vector-US-1 | Vector | HspB8   | 32955  | 19920346 | 49  |
| Vector-US-1 | Vector | CG31601 | 318835 | 24585747 | 48  |
| Vector-US-4 | Vector | CG31601 | 318835 | 24585747 | 55  |
| Vector-OS-1 | Vector | CG31601 | 318835 | 24585747 | 52  |
| Vector-US-1 | Vector | shu     | 45360  | 19922844 | 48  |
| Vector-US-1 | Vector | CG5706  | 42888  | 21355211 | 48  |
| Vector-US-1 | Vector | PPP4R2r | 31979  | 24641032 | 47  |
| Vector-US-4 | Vector | PPP4R2r | 31979  | 24641032 | 45  |
| Vector-US-1 | Vector | RpS15   | 36851  | 19922390 | 47  |
| Vector-US-4 | Vector | RpS15   | 36851  | 19922390 | 46  |
| p38b-4      | p38b   | RpS15   | 36851  | 19922390 | 59  |
| Vector-US-1 | Vector | Rpn11   | 33738  | 19920728 | 47  |
| Vector-US-3 | Vector | Rpn11   | 33738  | 19920728 | 52  |
| Vector-US-4 | Vector | Rpn11   | 33738  | 19920728 | 53  |
| Vector-OS-1 | Vector | Rpn11   | 33738  | 19920728 | 56  |
| p38a-1      | p38a   | Rpn11   | 33738  | 19920728 | 43  |
| p38b-4      | p38b   | Rpn11   | 33738  | 19920728 | 48  |
| Vector-US-1 | Vector | Tal     | 37804  | 45549185 | 47  |
| Vector-US-1 | Vector | eIF-5A  | 37846  | 19922878 | 46  |
| Vector-US-3 | Vector | eIF-5A  | 37846  | 19922878 | 76  |
| p38a-1      | p38a   | eIF-5A  | 37846  | 19922878 | 37  |
| p38a-2      | p38a   | eIF-5A  | 37846  | 19922878 | 63  |
| p38a-3      | p38a   | eIF-5A  | 37846  | 19922878 | 73  |
| p38b-1      | p38b   | eIF-5A  | 37846  | 19922878 | 60  |
| p38c-4      | p38c   | eIF-5A  | 37846  | 19922878 | 66  |
| Vector-US-1 | Vector | Zw      | 32974  | 24643350 | 46  |
| Vector-US-4 | Vector | Zw      | 32974  | 24643350 | 79  |
| p38c-4      | p38c   | Zw      | 32974  | 24643350 | 54  |

|             |        |            |         |          |     |
|-------------|--------|------------|---------|----------|-----|
| Vector-US-1 | Vector | CG1703     | 32112   | 24641342 | 46  |
| Vector-US-2 | Vector | CG1703     | 32112   | 24641342 | 115 |
| Vector-US-3 | Vector | CG1703     | 32112   | 24641342 | 52  |
| Mef2-US-2   | Mef2   | CG1703     | 32112   | 24641342 | 103 |
| p38a-1      | p38a   | CG1703     | 32112   | 24641342 | 68  |
| p38c-1      | p38c   | CG1703     | 32112   | 24641342 | 94  |
| Vector-US-1 | Vector | RpL23A     | 38208   | 24655502 | 46  |
| Vector-HS-1 | Vector | RpL23A     | 38208   | 24655502 | 97  |
| Vector-OS-1 | Vector | RpL23A     | 38208   | 24655502 | 220 |
| Mef2-US-2   | Mef2   | RpL23A     | 38208   | 24655502 | 55  |
| p38c-1      | p38c   | RpL23A     | 38208   | 24655502 | 47  |
| p38c-2      | p38c   | RpL23A     | 38208   | 24655502 | 60  |
| p38c-3      | p38c   | RpL23A     | 38208   | 24655502 | 57  |
| Vector-US-1 | Vector | Rpn9       | 42802   | 24649395 | 46  |
| Vector-US-2 | Vector | Rpn9       | 42802   | 24649395 | 222 |
| Vector-US-3 | Vector | Rpn9       | 42802   | 24649395 | 229 |
| Vector-US-4 | Vector | Rpn9       | 42802   | 24649395 | 105 |
| Vector-OS-1 | Vector | Rpn9       | 42802   | 24649395 | 68  |
| Vector-OS-3 | Vector | Rpn9       | 42802   | 24649395 | 87  |
| p38a-1      | p38a   | Rpn9       | 42802   | 24649395 | 218 |
| p38a-2      | p38a   | Rpn9       | 42802   | 24649395 | 200 |
| p38a-3      | p38a   | Rpn9       | 42802   | 24649395 | 90  |
| p38a-4      | p38a   | Rpn9       | 42802   | 24649395 | 106 |
| p38b-1      | p38b   | Rpn9       | 42802   | 24649395 | 108 |
| p38b-2      | p38b   | Rpn9       | 42802   | 24649395 | 95  |
| p38b-3      | p38b   | Rpn9       | 42802   | 24649395 | 166 |
| p38b-4      | p38b   | Rpn9       | 42802   | 24649395 | 185 |
| p38c-1      | p38c   | Rpn9       | 42802   | 24649395 | 91  |
| p38c-2      | p38c   | Rpn9       | 42802   | 24649395 | 172 |
| p38c-3      | p38c   | Rpn9       | 42802   | 24649395 | 135 |
| p38c-4      | p38c   | Rpn9       | 42802   | 24649395 | 191 |
| Vector-US-1 | Vector | Dap160     | 35378   | 17137488 | 46  |
| p38a-4      | p38a   | Dap160     | 35378   | 17137488 | 69  |
| Vector-US-1 | Vector | Su(var)3-9 | 41843   | 24647046 | 46  |
| Vector-US-2 | Vector | Su(var)3-9 | 41843   | 24647046 | 68  |
| Vector-US-4 | Vector | Su(var)3-9 | 41843   | 24647046 | 116 |
| Vector-HS-1 | Vector | Su(var)3-9 | 41843   | 24647046 | 56  |
| Vector-OS-1 | Vector | Su(var)3-9 | 41843   | 24647046 | 52  |
| p38a-1      | p38a   | Su(var)3-9 | 41843   | 24647046 | 55  |
| p38a-3      | p38a   | Su(var)3-9 | 41843   | 24647046 | 58  |
| Vector-US-1 | Vector | CG7546     | 38844   | 24660188 | 45  |
| p38c-3      | p38c   | CG7546     | 38844   | 24660188 | 72  |
| Vector-US-1 | Vector | CG8036     | 41027   | 24645119 | 45  |
| Vector-US-3 | Vector | CG8036     | 41027   | 24645119 | 75  |
| p38b-3      | p38b   | CG8036     | 41027   | 24645119 | 52  |
| Vector-US-1 | Vector | CG17768    | 3772012 | 78706862 | 44  |
| Vector-US-3 | Vector | CG17768    | 3772012 | 78706862 | 47  |



|             |        |              |         |           |     |
|-------------|--------|--------------|---------|-----------|-----|
| p38a-2      | p38a   | CG17768      | 3772012 | 78706862  | 41  |
| p38a-3      | p38a   | CG17768      | 3772012 | 78706862  | 61  |
| p38a-4      | p38a   | CG17768      | 3772012 | 78706862  | 47  |
| p38c-4      | p38c   | CG17768      | 3772012 | 78706862  | 48  |
| Vector-US-1 | Vector | CG10289      | 38714   | 24659210  | 44  |
| p38c-2      | p38c   | CG10289      | 38714   | 24659210  | 48  |
| p38c-4      | p38c   | CG10289      | 38714   | 24659210  | 64  |
| Vector-US-1 | Vector | svr          | 30998   | 45553847  | 44  |
| Mef2-US-2   | Mef2   | svr          | 30998   | 45553847  | 46  |
| p38a-1      | p38a   | svr          | 30998   | 45553847  | 44  |
| p38a-2      | p38a   | svr          | 30998   | 45553847  | 45  |
| Vector-US-1 | Vector | mod(mdg4)    | 49228   | 24648706  | 44  |
| p38a-2      | p38a   | mod(mdg4)    | 49228   | 24648706  | 49  |
| Vector-US-1 | Vector | alc          | 35931   | 20129813  | 44  |
| Vector-US-1 | Vector | l(2)37Cb     | 35192   | 19921526  | 44  |
| Vector-US-1 | Vector | Clic         | 32349   | 18859677  | 43  |
| p38c-3      | p38c   | Clic         | 32349   | 18859677  | 59  |
| Vector-US-1 | Vector | Pect         | 34716   | 45550973  | 43  |
| p38c-4      | p38c   | Pect         | 34716   | 19921220  | 56  |
| Vector-US-1 | Vector | HIP-R        | 31335   | 24639561  | 43  |
| Vector-US-1 | Vector | Aats-thr     | 45784   | 24583839  | 43  |
| Vector-US-4 | Vector | Aats-thr     | 45784   | 24583839  | 51  |
| Vector-US-1 | Vector | Chc          | 32537   | 17137000  | 43  |
| Vector-US-4 | Vector | Chc          | 32537   | 17137000  | 111 |
| Vector-HS-1 | Vector | Chc          | 32537   | 17137000  | 224 |
| Vector-OS-1 | Vector | Chc          | 32537   | 17137000  | 338 |
| Vector-OS-3 | Vector | Chc          | 32537   | 17137000  | 141 |
| Mef2-US-2   | Mef2   | Chc          | 32537   | 17137000  | 105 |
| p38a-2      | p38a   | Chc          | 32537   | 17137000  | 38  |
| p38c-2      | p38c   | Chc          | 32537   | 17137000  | 112 |
| p38c-3      | p38c   | Chc          | 32537   | 17137000  | 170 |
| Vector-US-1 | Vector | CG17737      | 38398   | 21357193  | 43  |
| Vector-US-1 | Vector | His4:CG33881 | 3772129 | 78707094  | 43  |
| Vector-US-1 | Vector | CG13900      | 38093   | 24654874  | 43  |
| p38c-2      | p38c   | CG13900      | 38093   | 19923020  | 76  |
| Vector-US-1 | Vector | sqh          | 31554   | 17530815  | 43  |
| Vector-US-2 | Vector | sqh          | 31554   | 17530815  | 101 |
| Vector-US-1 | Vector | Myo28B1      | 53515   | 281364565 | 42  |
| Vector-US-1 | Vector | ytr          | 47457   | 19922846  | 42  |
| Vector-US-2 | Vector | ytr          | 47457   | 19922846  | 83  |
| Vector-US-3 | Vector | ytr          | 47457   | 19922846  | 75  |
| Mef2-US-2   | Mef2   | ytr          | 47457   | 19922846  | 87  |
| p38a-2      | p38a   | ytr          | 47457   | 19922846  | 154 |
| p38a-3      | p38a   | ytr          | 47457   | 19922846  | 119 |
| Vector-US-1 | Vector | LvpH         | 35824   | 45549022  | 42  |
| Vector-US-1 | Vector | CG9769       | 40587   | 24644059  | 42  |
| Vector-US-4 | Vector | CG9769       | 40587   | 24644059  | 91  |

|             |        |           |         |          |     |
|-------------|--------|-----------|---------|----------|-----|
| p38a-2      | p38a   | CG9769    | 40587   | 24644059 | 84  |
| p38a-3      | p38a   | CG9769    | 40587   | 24644059 | 91  |
| p38a-4      | p38a   | CG9769    | 40587   | 24644059 | 52  |
| p38b-3      | p38b   | CG9769    | 40587   | 24644059 | 132 |
| p38c-1      | p38c   | CG9769    | 40587   | 24644059 | 86  |
| p38c-2      | p38c   | CG9769    | 40587   | 24644059 | 68  |
| p38c-4      | p38c   | CG9769    | 40587   | 24644059 | 48  |
| Vector-US-1 | Vector | CG8963    | 36913   | 19922420 | 42  |
| Vector-US-1 | Vector | CG5787    | 34684   | 24583962 | 42  |
| Vector-US-2 | Vector | CG5787    | 34684   | 24583962 | 146 |
| Vector-OS-1 | Vector | CG5787    | 34684   | 24583962 | 165 |
| p38a-2      | p38a   | CG5787    | 34684   | 24583962 | 166 |
| p38c-1      | p38c   | CG5787    | 34684   | 24583962 | 45  |
| p38c-4      | p38c   | CG5787    | 34684   | 24583962 | 196 |
| Vector-US-1 | Vector | wtrw      | 40931   | 24644919 | 41  |
| Vector-US-1 | Vector | Sec61beta | 46080   | 21356199 | 41  |
| Vector-US-2 | Vector | Sec61beta | 46080   | 21356199 | 49  |
| Vector-OS-1 | Vector | Sec61beta | 46080   | 21356199 | 83  |
| p38c-2      | p38c   | Sec61beta | 46080   | 21356199 | 93  |
| Vector-US-1 | Vector | Mcm3      | 31449   | 24639835 | 41  |
| Vector-US-2 | Vector | Mcm3      | 31449   | 24639835 | 48  |
| Vector-US-4 | Vector | Mcm3      | 31449   | 24639835 | 90  |
| p38a-3      | p38a   | Mcm3      | 31449   | 24639835 | 95  |
| p38c-3      | p38c   | Mcm3      | 31449   | 24639835 | 53  |
| p38c-4      | p38c   | Mcm3      | 31449   | 24639835 | 51  |
| Vector-US-1 | Vector | CG4030    | 37395   | 19922664 | 40  |
| p38c-1      | p38c   | CG4030    | 37395   | 19922664 | 50  |
| Vector-US-1 | Vector | Tango7    | 36565   | 19922220 | 40  |
| Vector-US-2 | Vector | Tango7    | 36565   | 19922220 | 160 |
| Vector-US-3 | Vector | Tango7    | 36565   | 19922220 | 176 |
| Vector-US-4 | Vector | Tango7    | 36565   | 19922220 | 190 |
| Vector-OS-1 | Vector | Tango7    | 36565   | 19922220 | 114 |
| p38a-2      | p38a   | Tango7    | 36565   | 19922220 | 60  |
| p38a-3      | p38a   | Tango7    | 36565   | 19922220 | 52  |
| p38b-1      | p38b   | Tango7    | 36565   | 19922220 | 32  |
| p38b-2      | p38b   | Tango7    | 36565   | 19922220 | 84  |
| p38b-4      | p38b   | Tango7    | 36565   | 19922220 | 109 |
| p38c-1      | p38c   | Tango7    | 36565   | 19922220 | 140 |
| p38c-2      | p38c   | Tango7    | 36565   | 19922220 | 195 |
| p38c-3      | p38c   | Tango7    | 36565   | 19922220 | 173 |
| p38c-4      | p38c   | Tango7    | 36565   | 19922220 | 115 |
| Vector-US-1 | Vector | CG14722   | 41419   | 28571655 | 40  |
| Vector-US-1 | Vector | CG33978   | 3885646 | 85724738 | 39  |
| p38b-1      | p38b   | CG33978   | 3885646 | 85724738 | 36  |
| Vector-US-1 | Vector | CG7692    | 39934   | 45550640 | 39  |
| Vector-US-2 | Vector | CG7692    | 39934   | 45550640 | 56  |
| Vector-US-4 | Vector | CG7692    | 39934   | 45550640 | 67  |

|             |        |          |       |           |     |
|-------------|--------|----------|-------|-----------|-----|
| Vector-OS-1 | Vector | CG7692   | 39934 | 45550640  | 97  |
| p38a-2      | p38a   | CG7692   | 39934 | 45550640  | 85  |
| p38c-1      | p38c   | CG7692   | 39934 | 45550640  | 120 |
| p38c-2      | p38c   | CG7692   | 39934 | 45550640  | 94  |
| p38c-3      | p38c   | CG7692   | 39934 | 45550640  | 109 |
| p38c-4      | p38c   | CG7692   | 39934 | 45550640  | 153 |
| Vector-US-1 | Vector | RpS17    | 39088 | 17647889  | 39  |
| Vector-US-3 | Vector | RpS17    | 39088 | 17647889  | 87  |
| Vector-US-4 | Vector | RpS17    | 39088 | 17647889  | 154 |
| Vector-HS-1 | Vector | RpS17    | 39088 | 17647889  | 85  |
| Vector-OS-1 | Vector | RpS17    | 39088 | 17647889  | 180 |
| Vector-OS-2 | Vector | RpS17    | 39088 | 17647889  | 52  |
| Vector-OS-3 | Vector | RpS17    | 39088 | 17647889  | 59  |
| Mef2-US-1   | Mef2   | RpS17    | 39088 | 17647889  | 46  |
| Mef2-US-2   | Mef2   | RpS17    | 39088 | 17647889  | 49  |
| p38a-4      | p38a   | RpS17    | 39088 | 17647889  | 50  |
| p38b-4      | p38b   | RpS17    | 39088 | 17647889  | 106 |
| p38c-1      | p38c   | RpS17    | 39088 | 17647889  | 174 |
| p38c-2      | p38c   | RpS17    | 39088 | 17647889  | 208 |
| p38c-3      | p38c   | RpS17    | 39088 | 17647889  | 110 |
| p38c-4      | p38c   | RpS17    | 39088 | 17647889  | 134 |
| Vector-US-1 | Vector | pen      | 33112 | 17737375  | 38  |
| Vector-US-1 | Vector | Moe      | 31816 | 24640670  | 38  |
| p38a-3      | p38a   | Moe      | 31816 | 24640670  | 59  |
| p38c-1      | p38c   | Moe      | 31816 | 24640670  | 57  |
| p38c-2      | p38c   | Moe      | 31816 | 24640670  | 50  |
| Vector-US-1 | Vector | RpL7A    | 31588 | 17530825  | 38  |
| Vector-OS-1 | Vector | RpL7A    | 31588 | 17530825  | 114 |
| Mef2-US-2   | Mef2   | RpL7A    | 31588 | 17530825  | 46  |
| Vector-US-1 | Vector | eIF3-S10 | 40563 | 24643988  | 38  |
| Vector-US-2 | Vector | eIF3-S10 | 40563 | 24643988  | 226 |
| Vector-US-3 | Vector | eIF3-S10 | 40563 | 24643988  | 117 |
| Vector-US-4 | Vector | eIF3-S10 | 40563 | 24643988  | 115 |
| Vector-HS-1 | Vector | eIF3-S10 | 40563 | 24643988  | 221 |
| Vector-OS-1 | Vector | eIF3-S10 | 40563 | 24643988  | 492 |
| Mef2-US-2   | Mef2   | eIF3-S10 | 40563 | 24643988  | 130 |
| p38a-2      | p38a   | eIF3-S10 | 40563 | 24643988  | 70  |
| p38a-3      | p38a   | eIF3-S10 | 40563 | 24643988  | 196 |
| p38b-3      | p38b   | eIF3-S10 | 40563 | 24643988  | 87  |
| p38c-1      | p38c   | eIF3-S10 | 40563 | 24643988  | 116 |
| p38c-2      | p38c   | eIF3-S10 | 40563 | 24643988  | 113 |
| p38c-4      | p38c   | eIF3-S10 | 40563 | 24643988  | 144 |
| Vector-US-1 | Vector | CG15086  | 37150 | 221330397 | 38  |
| Vector-US-1 | Vector | Men      | 47173 | 24646386  | 37  |
| Vector-US-3 | Vector | Men      | 47173 | 24646386  | 102 |
| Vector-US-4 | Vector | Men      | 47173 | 24646386  | 62  |
| p38a-1      | p38a   | Men      | 47173 | 24646386  | 49  |

|             |        |        |       |          |     |
|-------------|--------|--------|-------|----------|-----|
| Vector-US-1 | Vector | eIF-1A | 44260 | 24647907 | 37  |
| Vector-US-2 | Vector | eIF-1A | 44260 | 24647907 | 94  |
| Vector-US-4 | Vector | eIF-1A | 44260 | 24647907 | 102 |
| Vector-OS-1 | Vector | eIF-1A | 44260 | 24647907 | 85  |
| Mef2-US-1   | Mef2   | eIF-1A | 44260 | 24647907 | 104 |
| p38a-2      | p38a   | eIF-1A | 44260 | 24647907 | 120 |
| p38a-3      | p38a   | eIF-1A | 44260 | 24647907 | 104 |
| p38a-4      | p38a   | eIF-1A | 44260 | 24647907 | 56  |
| p38b-1      | p38b   | eIF-1A | 44260 | 24647907 | 106 |
| p38b-3      | p38b   | eIF-1A | 44260 | 24647907 | 104 |
| p38c-1      | p38c   | eIF-1A | 44260 | 24647907 | 113 |
| p38c-2      | p38c   | eIF-1A | 44260 | 24647907 | 116 |
| p38c-3      | p38c   | eIF-1A | 44260 | 24647907 | 115 |
| p38c-4      | p38c   | eIF-1A | 44260 | 24647907 | 52  |
| Vector-US-1 | Vector | melt   | 38785 | 62472042 | 37  |
| p38a-2      | p38a   | melt   | 38785 | 62472042 | 33  |
| Vector-US-1 | Vector | exba   | 40680 | 17737777 | 37  |
| Mef2-US-2   | Mef2   | exba   | 40680 | 17737777 | 99  |
| p38a-2      | p38a   | exba   | 40680 | 17737777 | 47  |
| p38b-4      | p38b   | exba   | 40680 | 17737777 | 53  |
| p38c-3      | p38c   | exba   | 40680 | 17737777 | 45  |
| p38c-4      | p38c   | exba   | 40680 | 17737777 | 45  |
| Vector-US-1 | Vector | Mcm7   | 39014 | 17647617 | 36  |
| Vector-US-4 | Vector | Mcm7   | 39014 | 17647617 | 73  |
| p38b-4      | p38b   | Mcm7   | 39014 | 17647617 | 84  |
| p38c-2      | p38c   | Mcm7   | 39014 | 17647617 | 81  |
| p38c-3      | p38c   | Mcm7   | 39014 | 17647617 | 82  |
| p38c-4      | p38c   | Mcm7   | 39014 | 17647617 | 66  |
| Vector-US-1 | Vector | CG5028 | 43102 | 24650122 | 36  |
| Vector-US-1 | Vector | Dcr-1  | 42693 | 17738129 | 36  |
| Vector-US-1 | Vector | Cp1    | 36546 | 24653514 | 36  |
| Vector-US-2 | Vector | Cp1    | 36546 | 24653514 | 95  |
| Vector-US-3 | Vector | Cp1    | 36546 | 24653516 | 49  |
| Vector-US-4 | Vector | Cp1    | 36546 | 24653516 | 65  |
| Vector-OS-1 | Vector | Cp1    | 36546 | 24653516 | 172 |
| Mef2-US-1   | Mef2   | Cp1    | 36546 | 24653516 | 50  |
| p38a-2      | p38a   | Cp1    | 36546 | 24653516 | 54  |
| p38a-4      | p38a   | Cp1    | 36546 | 24653516 | 77  |
| p38b-1      | p38b   | Cp1    | 36546 | 24653516 | 43  |
| p38c-3      | p38c   | Cp1    | 36546 | 24653516 | 48  |
| p38c-4      | p38c   | Cp1    | 36546 | 24653516 | 55  |
| Vector-US-1 | Vector | CG7928 | 43566 | 24651265 | 36  |
| Vector-US-3 | Vector | CG7928 | 43566 | 24651265 | 54  |
| Vector-US-1 | Vector | CG9281 | 32508 | 18859989 | 36  |
| Vector-US-1 | Vector | Rh4    | 39887 | 17136434 | 36  |
| p38a-1      | p38a   | Rh4    | 39887 | 17136434 | 34  |
| p38a-2      | p38a   | Rh4    | 39887 | 17136434 | 39  |

|             |        |           |        |          |     |
|-------------|--------|-----------|--------|----------|-----|
| Vector-US-1 | Vector | eIF-4E    | 45525  | 17864468 | 35  |
| Vector-US-2 | Vector | eIF-4E    | 45525  | 17864468 | 52  |
| Mef2-US-1   | Mef2   | eIF-4E    | 45525  | 17864468 | 59  |
| p38b-2      | p38b   | eIF-4E    | 45525  | 17864468 | 53  |
| Vector-US-1 | Vector | CG14480   | 36988  | 24654462 | 35  |
| Vector-US-1 | Vector | CG32556   | 32748  | 24642834 | 35  |
| Vector-US-1 | Vector | Rbp2      | 49809  | 24642533 | 35  |
| Vector-US-2 | Vector | Rbp2      | 49809  | 45555736 | 241 |
| Vector-US-3 | Vector | Rbp2      | 49809  | 24642533 | 207 |
| Vector-US-4 | Vector | Rbp2      | 49809  | 24642533 | 81  |
| Vector-HS-1 | Vector | Rbp2      | 49809  | 45555736 | 47  |
| Vector-OS-1 | Vector | Rbp2      | 49809  | 45555736 | 276 |
| Mef2-US-1   | Mef2   | Rbp2      | 49809  | 24642533 | 103 |
| Mef2-US-2   | Mef2   | Rbp2      | 49809  | 24642533 | 160 |
| p38a-1      | p38a   | Rbp2      | 49809  | 24642533 | 54  |
| p38a-3      | p38a   | Rbp2      | 49809  | 24642533 | 137 |
| p38a-4      | p38a   | Rbp2      | 49809  | 24642533 | 112 |
| p38b-1      | p38b   | Rbp2      | 49809  | 24642533 | 37  |
| p38c-1      | p38c   | Rbp2      | 49809  | 45555736 | 178 |
| p38c-2      | p38c   | Rbp2      | 49809  | 45555736 | 160 |
| p38c-4      | p38c   | Rbp2      | 49809  | 45555736 | 116 |
| Vector-US-1 | Vector | deltaCOP  | 45250  | 21355081 | 35  |
| Vector-US-2 | Vector | deltaCOP  | 45250  | 21355081 | 69  |
| Vector-OS-1 | Vector | deltaCOP  | 45250  | 21355081 | 52  |
| p38a-1      | p38a   | deltaCOP  | 45250  | 21355081 | 41  |
| p38a-4      | p38a   | deltaCOP  | 45250  | 21355081 | 106 |
| p38c-3      | p38c   | deltaCOP  | 45250  | 21355081 | 132 |
| Vector-US-1 | Vector | pont      | 53439  | 21358125 | 35  |
| Vector-US-4 | Vector | pont      | 53439  | 21358125 | 92  |
| Vector-OS-1 | Vector | pont      | 53439  | 21358125 | 89  |
| p38a-2      | p38a   | pont      | 53439  | 21358125 | 36  |
| p38b-3      | p38b   | pont      | 53439  | 21358125 | 47  |
| p38b-4      | p38b   | pont      | 53439  | 21358125 | 63  |
| p38c-2      | p38c   | pont      | 53439  | 21358125 | 63  |
| p38c-3      | p38c   | pont      | 53439  | 21358125 | 53  |
| p38c-4      | p38c   | pont      | 53439  | 21358125 | 173 |
| Vector-US-1 | Vector | NAT1      | 46020  | 85725014 | 34  |
| Vector-US-2 | Vector | NAT1      | 46020  | 85725014 | 231 |
| Vector-US-3 | Vector | NAT1      | 46020  | 85725014 | 156 |
| Vector-US-4 | Vector | NAT1      | 46020  | 85725014 | 99  |
| Vector-US-1 | Vector | CG17724   | 246682 | 28573836 | 34  |
| Vector-US-1 | Vector | CG1951    | 43423  | 21358011 | 34  |
| Vector-US-1 | Vector | chif      | 34974  | 24584601 | 34  |
| Vector-US-1 | Vector | l(1)G0156 | 32940  | 24643268 | 34  |
| Vector-US-2 | Vector | l(1)G0156 | 32940  | 24643268 | 76  |
| Vector-OS-1 | Vector | l(1)G0156 | 32940  | 24643268 | 64  |
| p38c-2      | p38c   | l(1)G0156 | 32940  | 24643268 | 55  |

|             |        |           |       |           |     |
|-------------|--------|-----------|-------|-----------|-----|
| p38c-4      | p38c   | l(1)G0156 | 32940 | 24643268  | 110 |
| Vector-US-1 | Vector | CG9338    | 35357 | 24585535  | 34  |
| Vector-US-1 | Vector | pav       | 38515 | 17136974  | 34  |
| p38a-1      | p38a   | pav       | 38515 | 17136974  | 37  |
| p38b-1      | p38b   | pav       | 38515 | 17136974  | 34  |
| Vector-US-1 | Vector | Top1      | 32458 | 24642136  | 34  |
| Vector-US-4 | Vector | Top1      | 32458 | 24642136  | 76  |
| Vector-OS-1 | Vector | Top1      | 32458 | 24642136  | 130 |
| Vector-US-1 | Vector | beta-Spec | 32746 | 17647191  | 34  |
| Vector-US-1 | Vector | alphaCop  | 38199 | 17137608  | 33  |
| Vector-US-2 | Vector | alphaCop  | 38199 | 17137608  | 365 |
| Vector-US-3 | Vector | alphaCop  | 38199 | 17137608  | 143 |
| Vector-US-4 | Vector | alphaCop  | 38199 | 17137608  | 174 |
| Vector-OS-1 | Vector | alphaCop  | 38199 | 17137608  | 158 |
| Vector-OS-2 | Vector | alphaCop  | 38199 | 17137608  | 46  |
| Mef2-US-2   | Mef2   | alphaCop  | 38199 | 17137608  | 76  |
| p38a-1      | p38a   | alphaCop  | 38199 | 17137608  | 50  |
| p38a-2      | p38a   | alphaCop  | 38199 | 17137608  | 45  |
| p38a-3      | p38a   | alphaCop  | 38199 | 17137608  | 98  |
| p38a-4      | p38a   | alphaCop  | 38199 | 17137608  | 162 |
| p38b-1      | p38b   | alphaCop  | 38199 | 17137608  | 47  |
| p38c-1      | p38c   | alphaCop  | 38199 | 17137608  | 57  |
| p38c-2      | p38c   | alphaCop  | 38199 | 17137608  | 90  |
| p38c-3      | p38c   | alphaCop  | 38199 | 17137608  | 62  |
| p38c-4      | p38c   | alphaCop  | 38199 | 17137608  | 254 |
| Vector-US-1 | Vector | SMC2      | 36653 | 19922276  | 33  |
| Vector-US-3 | Vector | SMC2      | 36653 | 19922276  | 97  |
| Vector-US-4 | Vector | SMC2      | 36653 | 19922276  | 126 |
| Vector-OS-1 | Vector | SMC2      | 36653 | 19922276  | 73  |
| p38a-4      | p38a   | SMC2      | 36653 | 19922276  | 112 |
| p38c-2      | p38c   | SMC2      | 36653 | 19922276  | 84  |
| p38c-3      | p38c   | SMC2      | 36653 | 19922276  | 210 |
| p38c-4      | p38c   | SMC2      | 36653 | 19922276  | 176 |
| Vector-US-1 | Vector | CG30263   | 37473 | 221330511 | 33  |
| Vector-US-1 | Vector | CG16974   | 34713 | 24584026  | 33  |
| Vector-US-1 | Vector | Dif       | 35045 | 281365129 | 32  |
| Vector-US-1 | Vector | ran       | 44072 | 21356159  | 32  |
| Vector-US-3 | Vector | ran       | 44072 | 21356159  | 111 |
| Vector-HS-1 | Vector | ran       | 44072 | 21356159  | 66  |
| p38a-2      | p38a   | ran       | 44072 | 21356159  | 38  |
| p38c-4      | p38c   | ran       | 44072 | 21356159  | 46  |
| Vector-US-1 | Vector | Cat       | 40048 | 17981717  | 32  |
| Vector-US-2 | Vector | Cat       | 40048 | 17981717  | 217 |
| p38a-2      | p38a   | Cat       | 40048 | 17981717  | 81  |
| p38b-1      | p38b   | Cat       | 40048 | 17981717  | 31  |
| p38c-1      | p38c   | Cat       | 40048 | 17981717  | 53  |
| p38c-2      | p38c   | Cat       | 40048 | 17981717  | 88  |

|             |        |               |       |           |     |
|-------------|--------|---------------|-------|-----------|-----|
| p38c-4      | p38c   | Cat           | 40048 | 17981717  | 142 |
| Vector-US-1 | Vector | CG9346        | 37381 | 19922658  | 32  |
| Vector-US-1 | Vector | Rtnl1         | 33721 | 28574660  | 32  |
| Vector-US-1 | Vector | CG32479       | 38103 | 24654914  | 31  |
| Vector-OS-1 | Vector | CG32479       | 38103 | 24654914  | 45  |
| Vector-US-1 | Vector | CG30122       | 37146 | 22024201  | 31  |
| Vector-US-2 | Vector | CG30122       | 37146 | 22024201  | 91  |
| Vector-US-4 | Vector | CG30122       | 37146 | 22024201  | 209 |
| Vector-OS-1 | Vector | CG30122       | 37146 | 22024201  | 276 |
| p38c-3      | p38c   | CG30122       | 37146 | 22024201  | 94  |
| p38c-4      | p38c   | CG30122       | 37146 | 22024201  | 191 |
| Vector-US-1 | Vector | skd           | 43906 | 17864210  | 31  |
| Vector-US-1 | Vector | Rrp4          | 37731 | 24762324  | 31  |
| Vector-US-1 | Vector | kon           | 35104 | 281365168 | 30  |
| Vector-US-1 | Vector | Dscam         | 35652 | 116007560 | 30  |
| Vector-US-1 | Vector | Mi-2          | 40170 | 24667055  | 30  |
| Vector-OS-3 | Vector | Mi-2          | 40170 | 24667055  | 65  |
| p38b-4      | p38b   | Mi-2          | 40170 | 24667055  | 182 |
| p38c-1      | p38c   | Mi-2          | 40170 | 24667055  | 71  |
| p38c-2      | p38c   | Mi-2          | 40170 | 24667055  | 77  |
| p38c-3      | p38c   | Mi-2          | 40170 | 24667055  | 104 |
| p38c-4      | p38c   | Mi-2          | 40170 | 24667055  | 83  |
| Vector-US-1 | Vector | CG6227        | 32464 | 24642151  | 30  |
| Vector-US-1 | Vector | alpha-Adaptin | 33211 | 28574818  | 30  |
| Vector-US-4 | Vector | alpha-Adaptin | 33211 | 28574818  | 89  |
| Vector-OS-1 | Vector | alpha-Adaptin | 33211 | 28574818  | 65  |
| p38a-3      | p38a   | alpha-Adaptin | 33211 | 28574818  | 77  |
| Vector-US-1 | Vector | SIP2          | 36332 | 24652946  | 29  |
| Vector-US-2 | Vector | Act42A        | 35526 | 17647133  | 433 |
| Vector-US-3 | Vector | Act42A        | 35526 | 17647133  | 316 |
| Vector-US-4 | Vector | Act42A        | 35526 | 17647133  | 427 |
| Vector-OS-1 | Vector | Act42A        | 35526 | 17647133  | 369 |
| Mef2-US-1   | Mef2   | Act42A        | 35526 | 17647133  | 266 |
| Mef2-US-2   | Mef2   | Act42A        | 35526 | 17647133  | 130 |
| p38a-2      | p38a   | Act42A        | 35526 | 17647133  | 393 |
| p38a-3      | p38a   | Act42A        | 35526 | 17647133  | 319 |
| p38c-1      | p38c   | Act42A        | 35526 | 17647133  | 310 |
| p38c-4      | p38c   | Act42A        | 35526 | 17647133  | 317 |
| Vector-US-2 | Vector | CG4389        | 34276 | 24583077  | 287 |
| Vector-US-3 | Vector | CG4389        | 34276 | 24583077  | 258 |
| Mef2-US-1   | Mef2   | CG4389        | 34276 | 24583077  | 145 |
| p38a-1      | p38a   | CG4389        | 34276 | 24583077  | 116 |
| p38a-2      | p38a   | CG4389        | 34276 | 19921000  | 71  |
| p38a-3      | p38a   | CG4389        | 34276 | 19921000  | 51  |
| p38b-1      | p38b   | CG4389        | 34276 | 19921000  | 33  |
| p38b-2      | p38b   | CG4389        | 34276 | 19921000  | 64  |
| p38c-1      | p38c   | CG4389        | 34276 | 19921000  | 108 |

|             |        |            |       |          |     |
|-------------|--------|------------|-------|----------|-----|
| p38c-2      | p38c   | CG4389     | 34276 | 19921000 | 98  |
| p38c-3      | p38c   | CG4389     | 34276 | 19921000 | 105 |
| p38c-4      | p38c   | CG4389     | 34276 | 24583077 | 371 |
| Vector-US-2 | Vector | CG14476    | 49953 | 21357605 | 275 |
| Vector-US-3 | Vector | CG14476    | 49953 | 21357605 | 65  |
| Vector-US-4 | Vector | CG14476    | 49953 | 21357605 | 134 |
| Mef2-US-1   | Mef2   | CG14476    | 49953 | 21357605 | 48  |
| p38a-1      | p38a   | CG14476    | 49953 | 21357605 | 60  |
| Vector-US-2 | Vector | Pros28.1   | 32584 | 17933602 | 264 |
| Vector-US-3 | Vector | Pros28.1   | 32584 | 17933602 | 198 |
| Vector-US-4 | Vector | Pros28.1   | 32584 | 17933602 | 222 |
| Vector-HS-1 | Vector | Pros28.1   | 32584 | 17933602 | 100 |
| Vector-OS-1 | Vector | Pros28.1   | 32584 | 17933602 | 143 |
| p38a-1      | p38a   | Pros28.1   | 32584 | 17933602 | 164 |
| p38a-2      | p38a   | Pros28.1   | 32584 | 17933602 | 222 |
| p38a-3      | p38a   | Pros28.1   | 32584 | 17933602 | 214 |
| p38a-4      | p38a   | Pros28.1   | 32584 | 17933602 | 184 |
| p38b-1      | p38b   | Pros28.1   | 32584 | 17933602 | 43  |
| p38b-4      | p38b   | Pros28.1   | 32584 | 17933602 | 74  |
| p38c-1      | p38c   | Pros28.1   | 32584 | 17933602 | 247 |
| p38c-2      | p38c   | Pros28.1   | 32584 | 17933602 | 114 |
| p38c-3      | p38c   | Pros28.1   | 32584 | 17933602 | 246 |
| p38c-4      | p38c   | Pros28.1   | 32584 | 17933602 | 232 |
| Vector-US-2 | Vector | betaTub60D | 37888 | 22024031 | 250 |
| Vector-OS-1 | Vector | betaTub60D | 37888 | 22024031 | 202 |
| p38c-3      | p38c   | betaTub60D | 37888 | 22024031 | 199 |
| p38c-4      | p38c   | betaTub60D | 37888 | 22024031 | 209 |
| Vector-US-2 | Vector | Pep        | 45961 | 17864514 | 219 |
| Vector-US-4 | Vector | Pep        | 45961 | 17864514 | 88  |
| Vector-OS-1 | Vector | Pep        | 45961 | 17864514 | 256 |
| Mef2-US-2   | Mef2   | Pep        | 45961 | 17864514 | 51  |
| p38a-1      | p38a   | Pep        | 45961 | 17864514 | 38  |
| p38a-2      | p38a   | Pep        | 45961 | 17864514 | 144 |
| p38a-4      | p38a   | Pep        | 45961 | 17864514 | 46  |
| p38b-3      | p38b   | Pep        | 45961 | 17864514 | 52  |
| p38c-1      | p38c   | Pep        | 45961 | 17864514 | 158 |
| p38c-2      | p38c   | Pep        | 45961 | 17864514 | 98  |
| p38c-3      | p38c   | Pep        | 45961 | 17864514 | 54  |
| p38c-4      | p38c   | Pep        | 45961 | 17864514 | 103 |
| Vector-US-2 | Vector | Ssb-c31a   | 34120 | 17137156 | 213 |
| Vector-US-3 | Vector | Ssb-c31a   | 34120 | 17137156 | 209 |
| Vector-US-4 | Vector | Ssb-c31a   | 34120 | 17137156 | 176 |
| Vector-HS-1 | Vector | Ssb-c31a   | 34120 | 17137156 | 269 |
| Vector-OS-1 | Vector | Ssb-c31a   | 34120 | 17137156 | 110 |
| Mef2-US-1   | Mef2   | Ssb-c31a   | 34120 | 17137156 | 207 |
| Mef2-US-2   | Mef2   | Ssb-c31a   | 34120 | 17137156 | 155 |
| p38a-1      | p38a   | Ssb-c31a   | 34120 | 17137156 | 128 |



|             |        |          |       |          |     |
|-------------|--------|----------|-------|----------|-----|
| p38a-2      | p38a   | Ssb-c31a | 34120 | 17137156 | 157 |
| p38a-3      | p38a   | Ssb-c31a | 34120 | 17137156 | 203 |
| p38a-4      | p38a   | Ssb-c31a | 34120 | 17137156 | 137 |
| p38b-2      | p38b   | Ssb-c31a | 34120 | 17137156 | 79  |
| p38b-3      | p38b   | Ssb-c31a | 34120 | 17137156 | 72  |
| p38c-1      | p38c   | Ssb-c31a | 34120 | 17137156 | 180 |
| p38c-2      | p38c   | Ssb-c31a | 34120 | 17137156 | 177 |
| p38c-3      | p38c   | Ssb-c31a | 34120 | 17137156 | 219 |
| p38c-4      | p38c   | Ssb-c31a | 34120 | 17137156 | 167 |
| Vector-US-2 | Vector | CG7878   | 40959 | 21355075 | 188 |
| Vector-US-3 | Vector | CG7878   | 40959 | 21355075 | 159 |
| p38a-1      | p38a   | CG7878   | 40959 | 21355075 | 116 |
| p38a-3      | p38a   | CG7878   | 40959 | 21355075 | 109 |
| p38a-4      | p38a   | CG7878   | 40959 | 21355075 | 112 |
| p38b-1      | p38b   | CG7878   | 40959 | 21355075 | 66  |
| p38b-4      | p38b   | CG7878   | 40959 | 21355075 | 50  |
| p38c-1      | p38c   | CG7878   | 40959 | 21355075 | 74  |
| p38c-2      | p38c   | CG7878   | 40959 | 21355075 | 81  |
| p38c-3      | p38c   | CG7878   | 40959 | 21355075 | 89  |
| p38c-4      | p38c   | CG7878   | 40959 | 21355075 | 150 |
| Vector-US-2 | Vector | CG5746   | 42903 | 24649638 | 185 |
| Vector-US-3 | Vector | CG5746   | 42903 | 24649638 | 174 |
| Vector-HS-1 | Vector | CG5746   | 42903 | 24649638 | 136 |
| p38b-3      | p38b   | CG5746   | 42903 | 24649638 | 135 |
| p38c-2      | p38c   | CG5746   | 42903 | 24649638 | 133 |
| p38c-4      | p38c   | CG5746   | 42903 | 24649638 | 144 |
| Vector-US-2 | Vector | nito     | 35756 | 19921778 | 182 |
| Vector-US-3 | Vector | nito     | 35756 | 19921778 | 102 |
| Vector-US-4 | Vector | nito     | 35756 | 19921778 | 152 |
| Vector-OS-1 | Vector | nito     | 35756 | 19921778 | 245 |
| Vector-OS-2 | Vector | nito     | 35756 | 19921778 | 49  |
| p38a-1      | p38a   | nito     | 35756 | 19921778 | 55  |
| p38a-2      | p38a   | nito     | 35756 | 19921778 | 52  |
| p38a-3      | p38a   | nito     | 35756 | 19921778 | 74  |
| p38a-4      | p38a   | nito     | 35756 | 19921778 | 108 |
| p38c-1      | p38c   | nito     | 35756 | 19921778 | 131 |
| p38c-2      | p38c   | nito     | 35756 | 19921778 | 157 |
| p38c-3      | p38c   | nito     | 35756 | 19921778 | 58  |
| p38c-4      | p38c   | nito     | 35756 | 19921778 | 130 |
| Vector-US-2 | Vector | Gdh      | 42832 | 24649460 | 170 |
| Vector-US-4 | Vector | Gdh      | 42832 | 24649460 | 75  |
| p38a-1      | p38a   | Gdh      | 42832 | 45553475 | 43  |
| p38a-4      | p38a   | Gdh      | 42832 | 45553475 | 56  |
| p38c-2      | p38c   | Gdh      | 42832 | 24649460 | 67  |
| p38c-4      | p38c   | Gdh      | 42832 | 24649460 | 104 |
| Vector-US-2 | Vector | Aly      | 44029 | 21356157 | 165 |
| Vector-US-4 | Vector | Aly      | 44029 | 21356157 | 306 |

|             |        |        |       |          |     |
|-------------|--------|--------|-------|----------|-----|
| Vector-OS-1 | Vector | Aly    | 44029 | 21356157 | 224 |
| Vector-OS-3 | Vector | Aly    | 44029 | 21356157 | 57  |
| p38a-1      | p38a   | Aly    | 44029 | 21356157 | 143 |
| p38a-2      | p38a   | Aly    | 44029 | 21356157 | 170 |
| p38a-4      | p38a   | Aly    | 44029 | 21356157 | 125 |
| p38b-4      | p38b   | Aly    | 44029 | 21356157 | 76  |
| p38c-1      | p38c   | Aly    | 44029 | 21356157 | 249 |
| p38c-2      | p38c   | Aly    | 44029 | 21356157 | 132 |
| p38c-3      | p38c   | Aly    | 44029 | 21356157 | 74  |
| p38c-4      | p38c   | Aly    | 44029 | 21356157 | 252 |
| Vector-US-2 | Vector | xl6    | 33967 | 24582360 | 163 |
| Vector-US-3 | Vector | xl6    | 33967 | 24582360 | 120 |
| Vector-US-4 | Vector | xl6    | 33967 | 24582360 | 79  |
| Vector-OS-1 | Vector | xl6    | 33967 | 24582360 | 253 |
| Vector-OS-2 | Vector | xl6    | 33967 | 24582360 | 106 |
| Mef2-US-2   | Mef2   | xl6    | 33967 | 24582360 | 105 |
| p38a-1      | p38a   | xl6    | 33967 | 24582360 | 57  |
| p38a-2      | p38a   | xl6    | 33967 | 24582360 | 103 |
| p38a-3      | p38a   | xl6    | 33967 | 24582360 | 45  |
| p38a-4      | p38a   | xl6    | 33967 | 24582360 | 51  |
| p38c-1      | p38c   | xl6    | 33967 | 24582360 | 84  |
| p38c-4      | p38c   | xl6    | 33967 | 24582360 | 58  |
| Vector-US-2 | Vector | apt    | 37734 | 17137234 | 157 |
| Vector-US-4 | Vector | apt    | 37734 | 17137234 | 69  |
| Vector-OS-1 | Vector | apt    | 37734 | 17137234 | 66  |
| Vector-US-2 | Vector | Pros26 | 39855 | 17737605 | 154 |
| Vector-US-3 | Vector | Pros26 | 39855 | 17737605 | 51  |
| Vector-US-4 | Vector | Pros26 | 39855 | 17737605 | 110 |
| Vector-OS-1 | Vector | Pros26 | 39855 | 17737605 | 55  |
| p38a-2      | p38a   | Pros26 | 39855 | 17737605 | 134 |
| p38a-3      | p38a   | Pros26 | 39855 | 17737605 | 49  |
| p38a-4      | p38a   | Pros26 | 39855 | 17737605 | 177 |
| p38b-1      | p38b   | Pros26 | 39855 | 17737605 | 85  |
| p38b-2      | p38b   | Pros26 | 39855 | 17737605 | 150 |
| p38b-4      | p38b   | Pros26 | 39855 | 17737605 | 146 |
| p38c-1      | p38c   | Pros26 | 39855 | 17737605 | 60  |
| p38c-3      | p38c   | Pros26 | 39855 | 17737605 | 202 |
| p38c-4      | p38c   | Pros26 | 39855 | 17737605 | 108 |
| Vector-US-2 | Vector | Rbp1   | 41294 | 24645765 | 145 |
| Vector-US-4 | Vector | Rbp1   | 41294 | 24645765 | 98  |
| Vector-OS-1 | Vector | Rbp1   | 41294 | 24645765 | 110 |
| p38a-1      | p38a   | Rbp1   | 41294 | 24645765 | 109 |
| p38b-4      | p38b   | Rbp1   | 41294 | 24645765 | 146 |
| p38c-1      | p38c   | Rbp1   | 41294 | 24645765 | 107 |
| p38c-2      | p38c   | Rbp1   | 41294 | 24645765 | 96  |
| p38c-3      | p38c   | Rbp1   | 41294 | 24645765 | 115 |
| p38c-4      | p38c   | Rbp1   | 41294 | 24645765 | 114 |

|             |        |         |       |          |     |
|-------------|--------|---------|-------|----------|-----|
| Vector-US-2 | Vector | Jafrac1 | 53578 | 17157991 | 144 |
| Vector-US-3 | Vector | Jafrac1 | 53578 | 17157991 | 150 |
| Vector-US-4 | Vector | Jafrac1 | 53578 | 17157991 | 113 |
| Vector-OS-1 | Vector | Jafrac1 | 53578 | 17157991 | 49  |
| Mef2-US-1   | Mef2   | Jafrac1 | 53578 | 17157991 | 145 |
| p38a-2      | p38a   | Jafrac1 | 53578 | 17157991 | 190 |
| p38a-3      | p38a   | Jafrac1 | 53578 | 17157991 | 93  |
| p38a-4      | p38a   | Jafrac1 | 53578 | 17157991 | 141 |
| p38b-1      | p38b   | Jafrac1 | 53578 | 17157991 | 33  |
| p38c-1      | p38c   | Jafrac1 | 53578 | 17157991 | 88  |
| p38c-2      | p38c   | Jafrac1 | 53578 | 17157991 | 122 |
| p38c-4      | p38c   | Jafrac1 | 53578 | 17157991 | 105 |
| Vector-US-2 | Vector | CG10527 | 37393 | 20130199 | 143 |
| Vector-US-3 | Vector | CG10527 | 37393 | 20130199 | 145 |
| p38a-2      | p38a   | CG10527 | 37393 | 20130199 | 112 |
| p38c-1      | p38c   | CG10527 | 37393 | 20130199 | 99  |
| p38c-2      | p38c   | CG10527 | 37393 | 20130199 | 53  |
| p38c-3      | p38c   | CG10527 | 37393 | 20130199 | 55  |
| p38c-4      | p38c   | CG10527 | 37393 | 20130199 | 84  |
| Vector-US-2 | Vector | RpS8    | 43532 | 24651181 | 142 |
| Vector-US-3 | Vector | RpS8    | 43532 | 24651181 | 155 |
| Vector-US-4 | Vector | RpS8    | 43532 | 24651181 | 128 |
| Vector-HS-1 | Vector | RpS8    | 43532 | 24651181 | 331 |
| Vector-OS-1 | Vector | RpS8    | 43532 | 24651181 | 374 |
| Vector-OS-2 | Vector | RpS8    | 43532 | 24651181 | 52  |
| Mef2-US-2   | Mef2   | RpS8    | 43532 | 24651181 | 82  |
| p38a-1      | p38a   | RpS8    | 43532 | 24651181 | 74  |
| p38a-2      | p38a   | RpS8    | 43532 | 24651181 | 156 |
| p38a-3      | p38a   | RpS8    | 43532 | 24651181 | 160 |
| p38a-4      | p38a   | RpS8    | 43532 | 24651181 | 190 |
| p38c-1      | p38c   | RpS8    | 43532 | 24651181 | 171 |
| p38c-2      | p38c   | RpS8    | 43532 | 24651181 | 223 |
| p38c-3      | p38c   | RpS8    | 43532 | 24651181 | 145 |
| p38c-4      | p38c   | RpS8    | 43532 | 24651181 | 192 |
| Vector-US-2 | Vector | RpS19a  | 32635 | 17647891 | 138 |
| Vector-US-3 | Vector | RpS19a  | 32635 | 17647891 | 154 |
| Vector-HS-1 | Vector | RpS19a  | 32635 | 17647891 | 156 |
| Vector-OS-1 | Vector | RpS19a  | 32635 | 17647891 | 164 |
| p38a-1      | p38a   | RpS19a  | 32635 | 17647891 | 96  |
| p38a-2      | p38a   | RpS19a  | 32635 | 17647891 | 108 |
| p38b-3      | p38b   | RpS19a  | 32635 | 17647891 | 98  |
| p38c-1      | p38c   | RpS19a  | 32635 | 17647891 | 53  |
| p38c-2      | p38c   | RpS19a  | 32635 | 17647891 | 49  |
| p38c-3      | p38c   | RpS19a  | 32635 | 17647891 | 53  |
| p38c-4      | p38c   | RpS19a  | 32635 | 17647891 | 49  |
| Vector-US-2 | Vector | CG7920  | 43562 | 21358615 | 137 |
| Vector-US-3 | Vector | CG7920  | 43562 | 21358615 | 163 |

|             |        |            |       |          |     |
|-------------|--------|------------|-------|----------|-----|
| Vector-US-4 | Vector | CG7920     | 43562 | 21358615 | 110 |
| Mef2-US-1   | Mef2   | CG7920     | 43562 | 21358615 | 56  |
| p38a-2      | p38a   | CG7920     | 43562 | 21358615 | 174 |
| p38a-4      | p38a   | CG7920     | 43562 | 21358615 | 51  |
| p38b-2      | p38b   | CG7920     | 43562 | 21358615 | 76  |
| p38c-2      | p38c   | CG7920     | 43562 | 21358615 | 47  |
| p38c-3      | p38c   | CG7920     | 43562 | 21358615 | 62  |
| p38c-4      | p38c   | CG7920     | 43562 | 21358615 | 116 |
| Vector-US-2 | Vector | RpS7       | 43594 | 21358459 | 136 |
| Vector-US-3 | Vector | RpS7       | 43594 | 21358459 | 71  |
| Vector-US-4 | Vector | RpS7       | 43594 | 21358459 | 103 |
| Vector-OS-1 | Vector | RpS7       | 43594 | 21358459 | 114 |
| Vector-OS-2 | Vector | RpS7       | 43594 | 21358459 | 76  |
| p38a-1      | p38a   | RpS7       | 43594 | 21358459 | 65  |
| p38a-2      | p38a   | RpS7       | 43594 | 21358459 | 69  |
| p38a-4      | p38a   | RpS7       | 43594 | 21358459 | 56  |
| p38b-3      | p38b   | RpS7       | 43594 | 21358459 | 94  |
| p38b-4      | p38b   | RpS7       | 43594 | 21358459 | 163 |
| p38c-1      | p38c   | RpS7       | 43594 | 21358459 | 114 |
| p38c-2      | p38c   | RpS7       | 43594 | 21358459 | 100 |
| p38c-3      | p38c   | RpS7       | 43594 | 21358459 | 96  |
| p38c-4      | p38c   | RpS7       | 43594 | 21358459 | 87  |
| Vector-US-2 | Vector | CG4447     | 39067 | 24661488 | 135 |
| Vector-US-3 | Vector | CG4447     | 39067 | 24661488 | 330 |
| Vector-US-4 | Vector | CG4447     | 39067 | 24661488 | 49  |
| Vector-OS-1 | Vector | CG4447     | 39067 | 24661488 | 130 |
| Mef2-US-1   | Mef2   | CG4447     | 39067 | 24661488 | 109 |
| p38a-1      | p38a   | CG4447     | 39067 | 24661488 | 212 |
| p38a-2      | p38a   | CG4447     | 39067 | 24661488 | 113 |
| p38a-3      | p38a   | CG4447     | 39067 | 24661488 | 134 |
| p38a-4      | p38a   | CG4447     | 39067 | 24661488 | 54  |
| p38b-1      | p38b   | CG4447     | 39067 | 24661488 | 82  |
| p38c-1      | p38c   | CG4447     | 39067 | 24661488 | 83  |
| p38c-2      | p38c   | CG4447     | 39067 | 24661488 | 86  |
| p38c-4      | p38c   | CG4447     | 39067 | 24661488 | 108 |
| Vector-US-2 | Vector | Prosalpha7 | 36018 | 24652204 | 134 |
| Vector-US-3 | Vector | Prosalpha7 | 36018 | 24652204 | 127 |
| Vector-US-4 | Vector | Prosalpha7 | 36018 | 24652204 | 169 |
| Vector-HS-1 | Vector | Prosalpha7 | 36018 | 24652204 | 57  |
| p38a-1      | p38a   | Prosalpha7 | 36018 | 24652204 | 121 |
| p38a-2      | p38a   | Prosalpha7 | 36018 | 24652204 | 121 |
| p38a-3      | p38a   | Prosalpha7 | 36018 | 24652204 | 185 |
| p38a-4      | p38a   | Prosalpha7 | 36018 | 24652204 | 83  |
| p38b-4      | p38b   | Prosalpha7 | 36018 | 24652204 | 49  |
| p38c-1      | p38c   | Prosalpha7 | 36018 | 24652204 | 110 |
| p38c-3      | p38c   | Prosalpha7 | 36018 | 24652204 | 267 |
| p38c-4      | p38c   | Prosalpha7 | 36018 | 24652204 | 162 |

|             |        |         |         |           |     |
|-------------|--------|---------|---------|-----------|-----|
| Vector-US-2 | Vector | CG34439 | 5740593 | 161077031 | 130 |
| Vector-US-3 | Vector | CG34439 | 5740593 | 161077031 | 118 |
| Vector-US-4 | Vector | CG34439 | 5740593 | 161077031 | 47  |
| Mef2-US-1   | Mef2   | CG34439 | 5740593 | 161077031 | 99  |
| p38a-2      | p38a   | CG34439 | 5740593 | 161077031 | 109 |
| p38b-1      | p38b   | CG34439 | 5740593 | 161077031 | 64  |
| Vector-US-2 | Vector | Cbp80   | 44409   | 24639719  | 125 |
| Vector-US-2 | Vector | Cam     | 36329   | 17647231  | 121 |
| Vector-US-3 | Vector | Cam     | 36329   | 17647231  | 52  |
| Vector-US-4 | Vector | Cam     | 36329   | 17647231  | 120 |
| Vector-HS-1 | Vector | Cam     | 36329   | 17647231  | 46  |
| Vector-OS-3 | Vector | Cam     | 36329   | 17647231  | 82  |
| p38a-1      | p38a   | Cam     | 36329   | 17647231  | 45  |
| p38a-3      | p38a   | Cam     | 36329   | 17647231  | 75  |
| p38c-1      | p38c   | Cam     | 36329   | 17647231  | 50  |
| p38c-3      | p38c   | Cam     | 36329   | 17647231  | 82  |
| p38c-4      | p38c   | Cam     | 36329   | 17647231  | 98  |
| Vector-US-2 | Vector | CG10077 | 38756   | 28574962  | 117 |
| p38a-1      | p38a   | CG10077 | 38756   | 28574962  | 120 |
| p38a-2      | p38a   | CG10077 | 38756   | 28574962  | 101 |
| p38a-3      | p38a   | CG10077 | 38756   | 28574962  | 143 |
| p38a-4      | p38a   | CG10077 | 38756   | 28574962  | 103 |
| p38b-1      | p38b   | CG10077 | 38756   | 28574962  | 40  |
| p38b-4      | p38b   | CG10077 | 38756   | 28574962  | 47  |
| p38c-4      | p38c   | CG10077 | 38756   | 28574962  | 121 |
| Vector-US-2 | Vector | Nurf-38 | 37922   | 45549187  | 114 |
| Vector-US-4 | Vector | Nurf-38 | 37922   | 45549187  | 51  |
| p38a-1      | p38a   | Nurf-38 | 37922   | 45549187  | 38  |
| Vector-US-2 | Vector | Sod     | 39251   | 17136496  | 111 |
| Vector-US-3 | Vector | Sod     | 39251   | 17136496  | 59  |
| Vector-US-2 | Vector | SF2     | 53443   | 21358097  | 111 |
| Vector-US-3 | Vector | SF2     | 53443   | 21358097  | 67  |
| Vector-US-4 | Vector | SF2     | 53443   | 21358097  | 88  |
| Vector-OS-1 | Vector | SF2     | 53443   | 21358097  | 188 |
| p38a-1      | p38a   | SF2     | 53443   | 21358097  | 90  |
| p38a-2      | p38a   | SF2     | 53443   | 21358097  | 117 |
| p38a-4      | p38a   | SF2     | 53443   | 21358097  | 49  |
| p38b-1      | p38b   | SF2     | 53443   | 21358097  | 38  |
| p38c-2      | p38c   | SF2     | 53443   | 21358097  | 96  |
| p38c-4      | p38c   | SF2     | 53443   | 21358097  | 177 |
| Vector-US-2 | Vector | Hrb27C  | 33968   | 17136728  | 110 |
| p38c-1      | p38c   | Hrb27C  | 33968   | 17136728  | 152 |
| p38c-2      | p38c   | Hrb27C  | 33968   | 17136728  | 125 |
| p38c-3      | p38c   | Hrb27C  | 33968   | 17136728  | 66  |
| p38c-4      | p38c   | Hrb27C  | 33968   | 17136728  | 124 |
| Vector-US-2 | Vector | cathD   | 45268   | 21355083  | 110 |
| Vector-US-3 | Vector | cathD   | 45268   | 21355083  | 59  |

|             |        |          |       |          |     |
|-------------|--------|----------|-------|----------|-----|
| Vector-US-4 | Vector | cathD    | 45268 | 21355083 | 56  |
| p38a-1      | p38a   | cathD    | 45268 | 21355083 | 56  |
| p38a-2      | p38a   | cathD    | 45268 | 21355083 | 64  |
| Vector-US-2 | Vector | RpL40    | 33629 | 17136570 | 109 |
| Vector-US-3 | Vector | RpL40    | 33629 | 17136570 | 151 |
| Vector-US-4 | Vector | RpL40    | 33629 | 17136570 | 126 |
| p38a-1      | p38a   | RpL40    | 33629 | 17136570 | 63  |
| p38a-2      | p38a   | RpL40    | 33629 | 17136570 | 152 |
| p38a-3      | p38a   | RpL40    | 33629 | 17136570 | 136 |
| p38b-2      | p38b   | RpL40    | 33629 | 17136570 | 63  |
| Vector-US-2 | Vector | Thiolase | 37784 | 17137578 | 107 |
| p38a-1      | p38a   | Thiolase | 37784 | 17137578 | 68  |
| p38c-4      | p38c   | Thiolase | 37784 | 17137578 | 61  |
| Vector-US-2 | Vector | pnut     | 35801 | 17137038 | 105 |
| Vector-US-3 | Vector | pnut     | 35801 | 17137038 | 48  |
| Vector-US-4 | Vector | pnut     | 35801 | 17137038 | 127 |
| Vector-HS-1 | Vector | pnut     | 35801 | 17137038 | 70  |
| Vector-OS-1 | Vector | pnut     | 35801 | 17137038 | 90  |
| p38a-2      | p38a   | pnut     | 35801 | 17137038 | 80  |
| p38a-3      | p38a   | pnut     | 35801 | 17137038 | 75  |
| p38a-4      | p38a   | pnut     | 35801 | 17137038 | 85  |
| p38b-2      | p38b   | pnut     | 35801 | 17137038 | 68  |
| p38b-4      | p38b   | pnut     | 35801 | 17137038 | 55  |
| p38c-2      | p38c   | pnut     | 35801 | 17137038 | 56  |
| p38c-3      | p38c   | pnut     | 35801 | 17137038 | 62  |
| Vector-US-2 | Vector | RpL12    | 45329 | 17864452 | 105 |
| Vector-US-3 | Vector | RpL12    | 45329 | 17864452 | 252 |
| Vector-US-4 | Vector | RpL12    | 45329 | 17864452 | 47  |
| Vector-HS-1 | Vector | RpL12    | 45329 | 17864452 | 110 |
| Vector-OS-1 | Vector | RpL12    | 45329 | 17864452 | 127 |
| Vector-OS-2 | Vector | RpL12    | 45329 | 17864452 | 69  |
| Vector-OS-3 | Vector | RpL12    | 45329 | 17864452 | 60  |
| Mef2-US-2   | Mef2   | RpL12    | 45329 | 17864452 | 110 |
| p38a-1      | p38a   | RpL12    | 45329 | 17864452 | 48  |
| p38a-2      | p38a   | RpL12    | 45329 | 17864452 | 44  |
| p38a-3      | p38a   | RpL12    | 45329 | 17864452 | 78  |
| p38a-4      | p38a   | RpL12    | 45329 | 17864452 | 136 |
| p38c-1      | p38c   | RpL12    | 45329 | 17864452 | 144 |
| p38c-3      | p38c   | RpL12    | 45329 | 17864452 | 53  |
| p38c-4      | p38c   | RpL12    | 45329 | 17864452 | 137 |
| Vector-US-2 | Vector | glo      | 41431 | 24646105 | 104 |
| Vector-OS-1 | Vector | glo      | 41431 | 24646105 | 140 |
| p38a-2      | p38a   | glo      | 41431 | 24646105 | 55  |
| p38c-2      | p38c   | glo      | 41431 | 24646105 | 70  |
| Vector-US-2 | Vector | CG17331  | 34999 | 20129563 | 104 |
| Vector-US-3 | Vector | CG17331  | 34999 | 20129563 | 55  |
| Vector-US-4 | Vector | CG17331  | 34999 | 20129563 | 82  |

|             |        |           |       |          |     |
|-------------|--------|-----------|-------|----------|-----|
| Vector-HS-1 | Vector | CG17331   | 34999 | 20129563 | 48  |
| p38a-1      | p38a   | CG17331   | 34999 | 20129563 | 116 |
| p38a-3      | p38a   | CG17331   | 34999 | 20129563 | 52  |
| p38a-4      | p38a   | CG17331   | 34999 | 20129563 | 75  |
| p38b-1      | p38b   | CG17331   | 34999 | 20129563 | 85  |
| p38b-2      | p38b   | CG17331   | 34999 | 20129563 | 65  |
| p38b-4      | p38b   | CG17331   | 34999 | 20129563 | 71  |
| p38c-1      | p38c   | CG17331   | 34999 | 20129563 | 77  |
| p38c-2      | p38c   | CG17331   | 34999 | 20129563 | 70  |
| p38c-3      | p38c   | CG17331   | 34999 | 20129563 | 125 |
| p38c-4      | p38c   | CG17331   | 34999 | 20129563 | 146 |
| Vector-US-2 | Vector | RpS4      | 39484 | 24663668 | 101 |
| Vector-US-3 | Vector | RpS4      | 39484 | 24663668 | 156 |
| Vector-US-4 | Vector | RpS4      | 39484 | 24663668 | 124 |
| Vector-HS-1 | Vector | RpS4      | 39484 | 24663668 | 232 |
| Vector-OS-1 | Vector | RpS4      | 39484 | 24663668 | 217 |
| Mef2-US-2   | Mef2   | RpS4      | 39484 | 24663668 | 72  |
| p38a-1      | p38a   | RpS4      | 39484 | 24663668 | 98  |
| p38a-3      | p38a   | RpS4      | 39484 | 24663668 | 201 |
| p38c-1      | p38c   | RpS4      | 39484 | 24663668 | 57  |
| p38c-2      | p38c   | RpS4      | 39484 | 24663668 | 104 |
| p38c-3      | p38c   | RpS4      | 39484 | 24663668 | 93  |
| p38c-4      | p38c   | RpS4      | 39484 | 24663668 | 46  |
| Vector-US-2 | Vector | Ufd1-like | 39254 | 17737561 | 100 |
| Vector-US-4 | Vector | Ufd1-like | 39254 | 17737561 | 98  |
| Mef2-US-1   | Mef2   | Ufd1-like | 39254 | 17737561 | 92  |
| p38a-1      | p38a   | Ufd1-like | 39254 | 17737561 | 110 |
| p38a-2      | p38a   | Ufd1-like | 39254 | 17737561 | 89  |
| p38a-4      | p38a   | Ufd1-like | 39254 | 17737561 | 105 |
| p38b-2      | p38b   | Ufd1-like | 39254 | 17737561 | 67  |
| p38c-1      | p38c   | Ufd1-like | 39254 | 17737561 | 72  |
| p38c-2      | p38c   | Ufd1-like | 39254 | 17737561 | 87  |
| Vector-US-2 | Vector | mRpL55    | 42290 | 21356717 | 94  |
| p38a-1      | p38a   | mRpL55    | 42290 | 21356717 | 67  |
| Vector-US-2 | Vector | RpL9      | 34526 | 17137198 | 92  |
| Vector-US-4 | Vector | RpL9      | 34526 | 17137198 | 94  |
| Vector-OS-1 | Vector | RpL9      | 34526 | 17137198 | 63  |
| Vector-US-2 | Vector | CG13779   | 50428 | 21358401 | 92  |
| Vector-US-3 | Vector | CG13779   | 50428 | 21358401 | 61  |
| Vector-US-4 | Vector | CG13779   | 50428 | 21358401 | 83  |
| Mef2-US-1   | Mef2   | CG13779   | 50428 | 21358401 | 58  |
| p38a-2      | p38a   | CG13779   | 50428 | 21358401 | 84  |
| p38a-3      | p38a   | CG13779   | 50428 | 21358401 | 57  |
| p38c-3      | p38c   | CG13779   | 50428 | 21358401 | 70  |
| p38c-4      | p38c   | CG13779   | 50428 | 21358401 | 83  |
| Vector-US-2 | Vector | CG8728    | 35748 | 19921772 | 91  |
| Vector-US-2 | Vector | CG6543    | 36536 | 20129971 | 89  |

|             |        |         |       |          |     |
|-------------|--------|---------|-------|----------|-----|
| Mef2-US-1   | Mef2   | CG6543  | 36536 | 20129971 | 232 |
| Mef2-US-2   | Mef2   | CG6543  | 36536 | 20129971 | 76  |
| Vector-US-2 | Vector | eIF3-S9 | 36981 | 19922458 | 89  |
| Vector-US-4 | Vector | eIF3-S9 | 36981 | 19922458 | 108 |
| Vector-OS-2 | Vector | eIF3-S9 | 36981 | 19922458 | 55  |
| Mef2-US-1   | Mef2   | eIF3-S9 | 36981 | 19922458 | 60  |
| p38a-1      | p38a   | eIF3-S9 | 36981 | 19922458 | 41  |
| p38a-2      | p38a   | eIF3-S9 | 36981 | 19922458 | 45  |
| p38b-3      | p38b   | eIF3-S9 | 36981 | 19922458 | 49  |
| p38b-4      | p38b   | eIF3-S9 | 36981 | 19922458 | 56  |
| p38c-1      | p38c   | eIF3-S9 | 36981 | 19922458 | 49  |
| p38c-2      | p38c   | eIF3-S9 | 36981 | 19922458 | 53  |
| p38c-3      | p38c   | eIF3-S9 | 36981 | 19922458 | 57  |
| p38c-4      | p38c   | eIF3-S9 | 36981 | 19922458 | 129 |
| Vector-US-2 | Vector | Fer1HCH | 46415 | 17933722 | 88  |
| Vector-US-4 | Vector | Fer1HCH | 46415 | 17933722 | 73  |
| Vector-HS-1 | Vector | Fer1HCH | 46415 | 17933722 | 55  |
| Vector-OS-1 | Vector | Fer1HCH | 46415 | 17933722 | 183 |
| Vector-OS-2 | Vector | Fer1HCH | 46415 | 17933722 | 70  |
| p38a-1      | p38a   | Fer1HCH | 46415 | 17933722 | 65  |
| p38a-2      | p38a   | Fer1HCH | 46415 | 17933722 | 65  |
| p38a-4      | p38a   | Fer1HCH | 46415 | 17933722 | 73  |
| p38c-1      | p38c   | Fer1HCH | 46415 | 17933722 | 104 |
| p38c-2      | p38c   | Fer1HCH | 46415 | 17933722 | 84  |
| p38c-3      | p38c   | Fer1HCH | 46415 | 17933722 | 71  |
| p38c-4      | p38c   | Fer1HCH | 46415 | 17933722 | 177 |
| Vector-US-2 | Vector | CG8636  | 31243 | 24639372 | 87  |
| Vector-US-3 | Vector | CG8636  | 31243 | 24639372 | 84  |
| Vector-US-4 | Vector | CG8636  | 31243 | 24639372 | 141 |
| Vector-HS-1 | Vector | CG8636  | 31243 | 24639372 | 79  |
| Vector-OS-1 | Vector | CG8636  | 31243 | 24639372 | 159 |
| Mef2-US-1   | Mef2   | CG8636  | 31243 | 24639372 | 48  |
| p38a-1      | p38a   | CG8636  | 31243 | 24639372 | 51  |
| p38a-2      | p38a   | CG8636  | 31243 | 24639372 | 98  |
| p38a-3      | p38a   | CG8636  | 31243 | 24639372 | 88  |
| p38a-4      | p38a   | CG8636  | 31243 | 24639372 | 137 |
| p38c-1      | p38c   | CG8636  | 31243 | 24639372 | 161 |
| p38c-2      | p38c   | CG8636  | 31243 | 24639372 | 87  |
| p38c-3      | p38c   | CG8636  | 31243 | 24639372 | 178 |
| p38c-4      | p38c   | CG8636  | 31243 | 24639372 | 153 |
| Vector-US-2 | Vector | RpS3    | 42761 | 17136324 | 87  |
| Vector-US-3 | Vector | RpS3    | 42761 | 17136324 | 55  |
| Vector-US-4 | Vector | RpS3    | 42761 | 17136324 | 89  |
| Vector-HS-1 | Vector | RpS3    | 42761 | 17136324 | 135 |
| Vector-OS-1 | Vector | RpS3    | 42761 | 17136324 | 189 |
| Mef2-US-1   | Mef2   | RpS3    | 42761 | 17136324 | 48  |
| Mef2-US-2   | Mef2   | RpS3    | 42761 | 17136324 | 91  |



|             |        |         |       |           |     |
|-------------|--------|---------|-------|-----------|-----|
| p38a-2      | p38a   | RpS3    | 42761 | 17136324  | 81  |
| p38a-3      | p38a   | RpS3    | 42761 | 17136324  | 76  |
| p38c-1      | p38c   | RpS3    | 42761 | 17136324  | 123 |
| p38c-2      | p38c   | RpS3    | 42761 | 17136324  | 74  |
| p38c-4      | p38c   | RpS3    | 42761 | 17136324  | 48  |
| Vector-US-2 | Vector | RpL19   | 37995 | 17136322  | 84  |
| Vector-US-3 | Vector | RpL19   | 37995 | 17136322  | 152 |
| Vector-US-4 | Vector | RpL19   | 37995 | 17136322  | 93  |
| Vector-HS-1 | Vector | RpL19   | 37995 | 17136322  | 84  |
| Vector-OS-1 | Vector | RpL19   | 37995 | 17136322  | 146 |
| p38a-1      | p38a   | RpL19   | 37995 | 17136322  | 81  |
| p38c-1      | p38c   | RpL19   | 37995 | 17136322  | 94  |
| p38c-2      | p38c   | RpL19   | 37995 | 17136322  | 115 |
| p38c-3      | p38c   | RpL19   | 37995 | 17136322  | 93  |
| p38c-4      | p38c   | RpL19   | 37995 | 17136322  | 58  |
| Vector-US-2 | Vector | Rip11   | 32850 | 281361079 | 83  |
| Vector-US-3 | Vector | Rip11   | 32850 | 281361079 | 97  |
| Vector-HS-1 | Vector | Rip11   | 32850 | 281361079 | 52  |
| p38b-1      | p38b   | Rip11   | 32850 | 281361079 | 73  |
| Vector-US-2 | Vector | CG12909 | 36087 | 19921968  | 77  |
| Vector-US-4 | Vector | CG12909 | 36087 | 19921968  | 159 |
| Vector-HS-1 | Vector | CG12909 | 36087 | 19921968  | 46  |
| Vector-OS-1 | Vector | CG12909 | 36087 | 19921968  | 111 |
| Vector-OS-2 | Vector | CG12909 | 36087 | 19921968  | 49  |
| Mef2-US-1   | Mef2   | CG12909 | 36087 | 19921968  | 47  |
| p38a-1      | p38a   | CG12909 | 36087 | 19921968  | 59  |
| p38a-2      | p38a   | CG12909 | 36087 | 19921968  | 141 |
| p38a-4      | p38a   | CG12909 | 36087 | 19921968  | 95  |
| p38b-2      | p38b   | CG12909 | 36087 | 19921968  | 60  |
| p38c-1      | p38c   | CG12909 | 36087 | 19921968  | 204 |
| p38c-2      | p38c   | CG12909 | 36087 | 19921968  | 122 |
| p38c-3      | p38c   | CG12909 | 36087 | 19921968  | 48  |
| p38c-4      | p38c   | CG12909 | 36087 | 19921968  | 143 |
| Vector-US-2 | Vector | Pros25  | 41531 | 17737927  | 76  |
| Vector-US-3 | Vector | Pros25  | 41531 | 17737927  | 138 |
| Vector-US-4 | Vector | Pros25  | 41531 | 17737927  | 92  |
| Vector-HS-1 | Vector | Pros25  | 41531 | 17737927  | 56  |
| p38a-1      | p38a   | Pros25  | 41531 | 17737927  | 74  |
| p38a-2      | p38a   | Pros25  | 41531 | 17737927  | 113 |
| p38a-3      | p38a   | Pros25  | 41531 | 17737927  | 74  |
| p38a-4      | p38a   | Pros25  | 41531 | 17737927  | 140 |
| p38b-1      | p38b   | Pros25  | 41531 | 17737927  | 66  |
| p38b-2      | p38b   | Pros25  | 41531 | 17737927  | 59  |
| p38b-3      | p38b   | Pros25  | 41531 | 17737927  | 89  |
| p38c-3      | p38c   | Pros25  | 41531 | 17737927  | 85  |
| Vector-US-2 | Vector | RpL23   | 37628 | 17647883  | 75  |
| Vector-HS-1 | Vector | RpL23   | 37628 | 17647883  | 85  |

|             |        |            |       |          |     |
|-------------|--------|------------|-------|----------|-----|
| Vector-OS-1 | Vector | RpL23      | 37628 | 17647883 | 128 |
| Vector-US-2 | Vector | CG11777    | 36108 | 24652460 | 72  |
| Vector-OS-1 | Vector | CG11777    | 36108 | 24652460 | 87  |
| Vector-OS-3 | Vector | CG11777    | 36108 | 24652460 | 49  |
| p38a-4      | p38a   | CG11777    | 36108 | 24652460 | 88  |
| p38c-3      | p38c   | CG11777    | 36108 | 24652460 | 72  |
| Vector-US-2 | Vector | HmgZ       | 37480 | 24657271 | 72  |
| Vector-US-3 | Vector | HmgZ       | 37480 | 24657271 | 70  |
| Vector-HS-1 | Vector | HmgZ       | 37480 | 24657271 | 71  |
| Vector-OS-1 | Vector | HmgZ       | 37480 | 24657271 | 140 |
| Mef2-US-1   | Mef2   | HmgZ       | 37480 | 24657271 | 63  |
| Mef2-US-2   | Mef2   | HmgZ       | 37480 | 24657271 | 115 |
| p38a-2      | p38a   | HmgZ       | 37480 | 24657271 | 58  |
| p38a-3      | p38a   | HmgZ       | 37480 | 24657271 | 70  |
| p38b-3      | p38b   | HmgZ       | 37480 | 24657271 | 130 |
| p38c-1      | p38c   | HmgZ       | 37480 | 24657271 | 70  |
| p38c-2      | p38c   | HmgZ       | 37480 | 24657271 | 67  |
| p38c-3      | p38c   | HmgZ       | 37480 | 24657271 | 80  |
| Vector-US-2 | Vector | blw        | 37617 | 24658560 | 71  |
| Vector-US-3 | Vector | blw        | 37617 | 24658560 | 47  |
| p38a-1      | p38a   | blw        | 37617 | 24658560 | 34  |
| Vector-US-2 | Vector | CSN4       | 35759 | 17137696 | 69  |
| Vector-US-4 | Vector | CSN4       | 35759 | 17137696 | 116 |
| Vector-US-2 | Vector | Gs1        | 33172 | 17136208 | 69  |
| p38a-1      | p38a   | Gs1        | 33172 | 17136208 | 73  |
| p38c-2      | p38c   | Gs1        | 33172 | 17136208 | 84  |
| p38c-4      | p38c   | Gs1        | 33172 | 17136208 | 69  |
| Vector-US-2 | Vector | CG2046     | 40719 | 21357311 | 68  |
| Vector-US-3 | Vector | CG2046     | 40719 | 21357311 | 61  |
| Vector-US-4 | Vector | CG2046     | 40719 | 21357311 | 46  |
| p38a-2      | p38a   | CG2046     | 40719 | 21357311 | 35  |
| Vector-US-2 | Vector | yata       | 43508 | 24651131 | 68  |
| Vector-US-2 | Vector | awd        | 43739 | 45549037 | 68  |
| Vector-US-4 | Vector | awd        | 43739 | 45549037 | 76  |
| Vector-US-2 | Vector | 1-Sep      | 33114 | 17647925 | 67  |
| Vector-US-2 | Vector | 26-29-p    | 39547 | 20428641 | 67  |
| Vector-US-2 | Vector | Rlip       | 42484 | 24648592 | 66  |
| Vector-US-2 | Vector | eIF-2alpha | 32617 | 18860087 | 65  |
| Vector-US-3 | Vector | eIF-2alpha | 32617 | 18860087 | 63  |
| Vector-US-4 | Vector | eIF-2alpha | 32617 | 18860087 | 120 |
| Vector-HS-1 | Vector | eIF-2alpha | 32617 | 18860087 | 71  |
| p38a-1      | p38a   | eIF-2alpha | 32617 | 18860087 | 44  |
| p38a-2      | p38a   | eIF-2alpha | 32617 | 18860087 | 60  |
| p38a-3      | p38a   | eIF-2alpha | 32617 | 18860087 | 95  |
| p38c-3      | p38c   | eIF-2alpha | 32617 | 18860087 | 55  |
| p38c-4      | p38c   | eIF-2alpha | 32617 | 18860087 | 58  |
| Vector-US-2 | Vector | CG3226     | 31597 | 18858119 | 65  |

|             |        |           |       |          |     |
|-------------|--------|-----------|-------|----------|-----|
| Vector-OS-1 | Vector | CG3226    | 31597 | 18858119 | 119 |
| Vector-OS-2 | Vector | CG3226    | 31597 | 18858119 | 102 |
| p38a-1      | p38a   | CG3226    | 31597 | 18858119 | 77  |
| p38a-2      | p38a   | CG3226    | 31597 | 18858119 | 38  |
| Vector-US-2 | Vector | l(3)76BDm | 40140 | 24666879 | 65  |
| Vector-US-2 | Vector | CG8798    | 40138 | 24666867 | 64  |
| Mef2-US-1   | Mef2   | CG8798    | 40138 | 24666867 | 74  |
| p38b-4      | p38b   | CG8798    | 40138 | 24666867 | 66  |
| p38c-2      | p38c   | CG8798    | 40138 | 24666867 | 55  |
| p38c-3      | p38c   | CG8798    | 40138 | 24666867 | 68  |
| p38c-4      | p38c   | CG8798    | 40138 | 24666867 | 86  |
| Vector-US-2 | Vector | CG10672   | 38598 | 21355319 | 64  |
| Vector-US-3 | Vector | CG10672   | 38598 | 21355319 | 136 |
| Vector-US-4 | Vector | CG10672   | 38598 | 21355319 | 159 |
| Vector-OS-1 | Vector | CG10672   | 38598 | 21355319 | 139 |
| p38a-1      | p38a   | CG10672   | 38598 | 21355319 | 40  |
| p38a-3      | p38a   | CG10672   | 38598 | 21355319 | 53  |
| p38c-4      | p38c   | CG10672   | 38598 | 21355319 | 84  |
| Vector-US-2 | Vector | CG6480    | 40228 | 24667326 | 63  |
| Vector-US-3 | Vector | CG6480    | 40228 | 24667326 | 72  |
| Vector-OS-1 | Vector | CG6480    | 40228 | 24667326 | 72  |
| p38a-1      | p38a   | CG6480    | 40228 | 24667326 | 81  |
| p38a-3      | p38a   | CG6480    | 40228 | 24667326 | 77  |
| p38a-4      | p38a   | CG6480    | 40228 | 24667326 | 50  |
| p38b-1      | p38b   | CG6480    | 40228 | 24667326 | 47  |
| p38b-2      | p38b   | CG6480    | 40228 | 24667326 | 59  |
| p38c-1      | p38c   | CG6480    | 40228 | 24667326 | 78  |
| p38c-4      | p38c   | CG6480    | 40228 | 24667326 | 74  |
| Vector-US-2 | Vector | CG8043    | 41030 | 24645123 | 63  |
| Vector-US-2 | Vector | CG6180    | 34683 | 24583960 | 62  |
| Vector-US-3 | Vector | CG6180    | 34683 | 24583960 | 48  |
| Vector-US-4 | Vector | CG6180    | 34683 | 24583960 | 47  |
| p38a-1      | p38a   | CG6180    | 34683 | 24583960 | 53  |
| p38b-4      | p38b   | CG6180    | 34683 | 24583960 | 50  |
| p38c-2      | p38c   | CG6180    | 34683 | 24583960 | 61  |
| Vector-US-2 | Vector | alt       | 42127 | 21358555 | 61  |
| Vector-US-4 | Vector | alt       | 42127 | 21358555 | 101 |
| Vector-OS-1 | Vector | alt       | 42127 | 21358555 | 62  |
| p38a-1      | p38a   | alt       | 42127 | 21358555 | 42  |
| p38b-3      | p38b   | alt       | 42127 | 21358555 | 82  |
| p38b-4      | p38b   | alt       | 42127 | 21358555 | 76  |
| p38c-1      | p38c   | alt       | 42127 | 21358555 | 172 |
| p38c-2      | p38c   | alt       | 42127 | 21358555 | 178 |
| p38c-3      | p38c   | alt       | 42127 | 21358555 | 135 |
| p38c-4      | p38c   | alt       | 42127 | 21358555 | 341 |
| Vector-US-2 | Vector | SmD1      | 44668 | 17864386 | 61  |
| Vector-US-4 | Vector | SmD1      | 44668 | 17864386 | 54  |

|             |        |            |       |          |     |
|-------------|--------|------------|-------|----------|-----|
| Vector-US-2 | Vector | epsilonCOP | 33908 | 19920832 | 60  |
| Vector-US-4 | Vector | epsilonCOP | 33908 | 19920832 | 48  |
| p38a-2      | p38a   | epsilonCOP | 33908 | 19920832 | 61  |
| Vector-US-2 | Vector | TSG101     | 39881 | 17648053 | 59  |
| p38a-2      | p38a   | TSG101     | 39881 | 17648053 | 46  |
| Vector-US-2 | Vector | Cnx99A     | 44643 | 17137190 | 59  |
| Vector-US-2 | Vector | Rnp4F      | 31448 | 24639833 | 58  |
| p38b-4      | p38b   | Rnp4F      | 31448 | 24639833 | 124 |
| p38c-2      | p38c   | Rnp4F      | 31448 | 24639833 | 87  |
| p38c-3      | p38c   | Rnp4F      | 31448 | 24639833 | 107 |
| p38c-4      | p38c   | Rnp4F      | 31448 | 24639833 | 60  |
| Vector-US-2 | Vector | l(2)k09913 | 37661 | 19922796 | 58  |
| Vector-US-2 | Vector | Pros29     | 37378 | 17136420 | 57  |
| Vector-US-3 | Vector | Pros29     | 37378 | 17136420 | 74  |
| Vector-US-4 | Vector | Pros29     | 37378 | 17136420 | 49  |
| p38a-2      | p38a   | Pros29     | 37378 | 17136420 | 34  |
| p38a-3      | p38a   | Pros29     | 37378 | 17136420 | 95  |
| p38a-4      | p38a   | Pros29     | 37378 | 17136420 | 117 |
| p38b-1      | p38b   | Pros29     | 37378 | 17136420 | 33  |
| p38b-4      | p38b   | Pros29     | 37378 | 17136420 | 118 |
| p38c-1      | p38c   | Pros29     | 37378 | 17136420 | 116 |
| p38c-3      | p38c   | Pros29     | 37378 | 17136420 | 64  |
| Vector-US-2 | Vector | bsf        | 35100 | 24584970 | 57  |
| Vector-US-2 | Vector | CG1458     | 43459 | 21358227 | 57  |
| Vector-US-2 | Vector | RpS28b     | 31897 | 18858095 | 57  |
| Vector-US-3 | Vector | RpS28b     | 31897 | 18858095 | 116 |
| Vector-US-4 | Vector | RpS28b     | 31897 | 18858095 | 92  |
| Vector-HS-1 | Vector | RpS28b     | 31897 | 18858095 | 52  |
| Vector-OS-1 | Vector | RpS28b     | 31897 | 18858095 | 51  |
| Vector-OS-2 | Vector | RpS28b     | 31897 | 18858095 | 58  |
| Vector-OS-3 | Vector | RpS28b     | 31897 | 18858095 | 76  |
| Mef2-US-1   | Mef2   | RpS28b     | 31897 | 18858095 | 64  |
| p38a-1      | p38a   | RpS28b     | 31897 | 18858095 | 39  |
| p38a-2      | p38a   | RpS28b     | 31897 | 18858095 | 105 |
| p38a-3      | p38a   | RpS28b     | 31897 | 18858095 | 105 |
| p38a-4      | p38a   | RpS28b     | 31897 | 18858095 | 114 |
| p38c-1      | p38c   | RpS28b     | 31897 | 18858095 | 110 |
| p38c-2      | p38c   | RpS28b     | 31897 | 18858095 | 105 |
| p38c-3      | p38c   | RpS28b     | 31897 | 18858095 | 64  |
| p38c-4      | p38c   | RpS28b     | 31897 | 18858095 | 65  |
| Vector-US-2 | Vector | l(2)35Df   | 48782 | 17864608 | 56  |
| Vector-US-4 | Vector | l(2)35Df   | 48782 | 17864608 | 56  |
| Vector-US-2 | Vector | CG11444    | 31388 | 18921125 | 55  |
| Vector-US-3 | Vector | CG11444    | 31388 | 18921125 | 110 |
| Vector-US-4 | Vector | CG11444    | 31388 | 18921125 | 54  |
| Vector-OS-1 | Vector | CG11444    | 31388 | 18921125 | 49  |
| Mef2-US-1   | Mef2   | CG11444    | 31388 | 18921125 | 49  |

|             |        |           |       |           |     |
|-------------|--------|-----------|-------|-----------|-----|
| p38a-1      | p38a   | CG11444   | 31388 | 18921125  | 42  |
| p38a-2      | p38a   | CG11444   | 31388 | 18921125  | 56  |
| p38a-3      | p38a   | CG11444   | 31388 | 18921125  | 110 |
| p38a-4      | p38a   | CG11444   | 31388 | 18921125  | 114 |
| Vector-US-2 | Vector | Prosbeta3 | 41079 | 21355629  | 54  |
| Vector-HS-1 | Vector | Prosbeta3 | 41079 | 21355629  | 78  |
| p38a-3      | p38a   | Prosbeta3 | 41079 | 21355629  | 60  |
| p38c-3      | p38c   | Prosbeta3 | 41079 | 21355629  | 125 |
| Vector-US-2 | Vector | CG10263   | 35256 | 19921556  | 52  |
| Vector-OS-1 | Vector | CG10263   | 35256 | 19921556  | 107 |
| Mef2-US-2   | Mef2   | CG10263   | 35256 | 19921556  | 60  |
| p38c-1      | p38c   | CG10263   | 35256 | 19921556  | 81  |
| p38c-3      | p38c   | CG10263   | 35256 | 19921556  | 106 |
| Vector-US-2 | Vector | Aats-ile  | 45785 | 24668543  | 50  |
| Vector-US-3 | Vector | Aats-ile  | 45785 | 24668543  | 52  |
| Vector-HS-1 | Vector | Aats-ile  | 45785 | 24668543  | 169 |
| Vector-OS-1 | Vector | Aats-ile  | 45785 | 24668543  | 141 |
| p38a-2      | p38a   | Aats-ile  | 45785 | 24668543  | 49  |
| p38c-2      | p38c   | Aats-ile  | 45785 | 24668543  | 57  |
| p38c-4      | p38c   | Aats-ile  | 45785 | 24668543  | 99  |
| Vector-US-2 | Vector | Hrb98DE   | 43385 | 17738267  | 49  |
| Vector-US-2 | Vector | RpS9      | 39108 | 24661707  | 49  |
| Vector-US-4 | Vector | RpS9      | 39108 | 24661707  | 53  |
| Vector-HS-1 | Vector | RpS9      | 39108 | 24661707  | 101 |
| p38a-2      | p38a   | RpS9      | 39108 | 24661707  | 40  |
| p38a-3      | p38a   | RpS9      | 39108 | 24661707  | 77  |
| p38a-4      | p38a   | RpS9      | 39108 | 24661707  | 46  |
| Vector-US-2 | Vector | smt3      | 33981 | 17137634  | 48  |
| Vector-US-3 | Vector | smt3      | 33981 | 17137634  | 54  |
| Vector-US-4 | Vector | smt3      | 33981 | 17137634  | 56  |
| Vector-US-2 | Vector | RpL22     | 31022 | 17137152  | 47  |
| Vector-HS-1 | Vector | RpL22     | 31022 | 17137152  | 64  |
| Vector-OS-1 | Vector | RpL22     | 31022 | 17137152  | 49  |
| p38a-4      | p38a   | RpL22     | 31022 | 17137152  | 55  |
| p38b-3      | p38b   | RpL22     | 31022 | 17137152  | 56  |
| Vector-US-2 | Vector | SmB       | 34426 | 17136806  | 47  |
| Vector-OS-1 | Vector | SmB       | 34426 | 17136806  | 49  |
| p38a-1      | p38a   | SmB       | 34426 | 17136806  | 40  |
| p38a-4      | p38a   | SmB       | 34426 | 17136806  | 106 |
| Vector-US-2 | Vector | larp      | 53567 | 281362724 | 47  |
| Vector-OS-1 | Vector | larp      | 53567 | 281362724 | 250 |
| p38a-3      | p38a   | larp      | 53567 | 24650800  | 102 |
| p38b-1      | p38b   | larp      | 53567 | 24650800  | 31  |
| p38c-2      | p38c   | larp      | 53567 | 281362724 | 77  |
| Vector-US-2 | Vector | RpS27     | 43039 | 24649976  | 47  |
| Vector-OS-1 | Vector | RpS27     | 43039 | 24649976  | 54  |
| p38a-1      | p38a   | RpS27     | 43039 | 24649976  | 54  |

|             |        |           |       |          |     |
|-------------|--------|-----------|-------|----------|-----|
| p38c-1      | p38c   | RpS27     | 43039 | 24649976 | 49  |
| Vector-US-2 | Vector | SmD3      | 36306 | 24652901 | 47  |
| Vector-US-2 | Vector | Manf      | 41983 | 17137698 | 47  |
| p38a-1      | p38a   | Manf      | 41983 | 17137698 | 33  |
| Vector-US-2 | Vector | Aldh      | 34256 | 20129399 | 46  |
| p38a-1      | p38a   | Aldh      | 34256 | 20129399 | 33  |
| p38b-1      | p38b   | Aldh      | 34256 | 20129399 | 43  |
| Vector-US-3 | Vector | Hsp68     | 42852 | 17738165 | 249 |
| Mef2-US-1   | Mef2   | Hsp68     | 42852 | 17738165 | 263 |
| Mef2-US-2   | Mef2   | Hsp68     | 42852 | 17738165 | 398 |
| p38c-3      | p38c   | Hsp68     | 42852 | 17738165 | 240 |
| Vector-US-3 | Vector | Act87E    | 48632 | 17137090 | 233 |
| p38b-3      | p38b   | Act87E    | 48632 | 17137090 | 46  |
| Vector-US-3 | Vector | Prosbeta7 | 40639 | 24644201 | 214 |
| Vector-US-4 | Vector | Prosbeta7 | 40639 | 24644201 | 164 |
| Vector-HS-1 | Vector | Prosbeta7 | 40639 | 24644201 | 58  |
| p38a-1      | p38a   | Prosbeta7 | 40639 | 24644201 | 100 |
| p38a-2      | p38a   | Prosbeta7 | 40639 | 24644201 | 66  |
| p38a-3      | p38a   | Prosbeta7 | 40639 | 24644201 | 108 |
| p38a-4      | p38a   | Prosbeta7 | 40639 | 24644201 | 162 |
| p38b-2      | p38b   | Prosbeta7 | 40639 | 24644201 | 176 |
| p38b-3      | p38b   | Prosbeta7 | 40639 | 24644201 | 92  |
| p38b-4      | p38b   | Prosbeta7 | 40639 | 24644201 | 68  |
| p38c-1      | p38c   | Prosbeta7 | 40639 | 24644201 | 59  |
| p38c-3      | p38c   | Prosbeta7 | 40639 | 24644201 | 231 |
| p38c-4      | p38c   | Prosbeta7 | 40639 | 24644201 | 262 |
| Vector-US-3 | Vector | poly      | 41641 | 24646530 | 129 |
| p38c-2      | p38c   | poly      | 41641 | 24646530 | 54  |
| p38c-4      | p38c   | poly      | 41641 | 24646530 | 89  |
| Vector-US-3 | Vector | glu       | 35001 | 24584683 | 124 |
| p38a-2      | p38a   | glu       | 35001 | 24584683 | 87  |
| p38a-3      | p38a   | glu       | 35001 | 24584683 | 92  |
| p38b-3      | p38b   | glu       | 35001 | 24584683 | 46  |
| p38b-4      | p38b   | glu       | 35001 | 24584683 | 176 |
| p38c-2      | p38c   | glu       | 35001 | 24584683 | 94  |
| p38c-3      | p38c   | glu       | 35001 | 24584683 | 290 |
| p38c-4      | p38c   | glu       | 35001 | 24584683 | 153 |
| Vector-US-3 | Vector | Prosalph5 | 36951 | 24654389 | 121 |
| Vector-US-4 | Vector | Prosalph5 | 36951 | 24654389 | 119 |
| p38a-1      | p38a   | Prosalph5 | 36951 | 24654389 | 110 |
| p38a-2      | p38a   | Prosalph5 | 36951 | 24654389 | 76  |
| p38a-3      | p38a   | Prosalph5 | 36951 | 24654389 | 145 |
| p38a-4      | p38a   | Prosalph5 | 36951 | 24654389 | 77  |
| p38b-1      | p38b   | Prosalph5 | 36951 | 24654389 | 55  |
| p38b-4      | p38b   | Prosalph5 | 36951 | 24654389 | 103 |
| p38c-2      | p38c   | Prosalph5 | 36951 | 24654389 | 67  |
| p38c-3      | p38c   | Prosalph5 | 36951 | 24654389 | 92  |

|             |        |           |       |           |     |
|-------------|--------|-----------|-------|-----------|-----|
| Vector-US-3 | Vector | sls       | 44013 | 161080703 | 121 |
| p38a-2      | p38a   | sls       | 44013 | 161080703 | 72  |
| p38a-3      | p38a   | sls       | 44013 | 161080703 | 98  |
| p38c-2      | p38c   | sls       | 44013 | 161080703 | 81  |
| p38c-4      | p38c   | sls       | 44013 | 161080703 | 61  |
| Vector-US-3 | Vector | Prosbeta1 | 46058 | 24653999  | 113 |
| Vector-US-4 | Vector | Prosbeta1 | 46058 | 24653999  | 79  |
| Vector-HS-1 | Vector | Prosbeta1 | 46058 | 24653999  | 81  |
| p38a-1      | p38a   | Prosbeta1 | 46058 | 24653999  | 65  |
| p38a-2      | p38a   | Prosbeta1 | 46058 | 24653999  | 93  |
| p38a-3      | p38a   | Prosbeta1 | 46058 | 24653999  | 80  |
| p38b-1      | p38b   | Prosbeta1 | 46058 | 24653999  | 39  |
| p38b-4      | p38b   | Prosbeta1 | 46058 | 24653999  | 64  |
| p38c-2      | p38c   | Prosbeta1 | 46058 | 24653999  | 101 |
| p38c-3      | p38c   | Prosbeta1 | 46058 | 24653999  | 155 |
| p38c-4      | p38c   | Prosbeta1 | 46058 | 24653999  | 163 |
| Vector-US-3 | Vector | CG10777   | 31707 | 18857967  | 97  |
| Vector-US-3 | Vector | Cdc37     | 38232 | 17136940  | 94  |
| Vector-US-4 | Vector | Cdc37     | 38232 | 17136940  | 69  |
| p38b-4      | p38b   | Cdc37     | 38232 | 17136940  | 105 |
| p38c-1      | p38c   | Cdc37     | 38232 | 17136940  | 120 |
| p38c-2      | p38c   | Cdc37     | 38232 | 17136940  | 80  |
| p38c-3      | p38c   | Cdc37     | 38232 | 17136940  | 166 |
| p38c-4      | p38c   | Cdc37     | 38232 | 17136940  | 159 |
| Vector-US-3 | Vector | oho23B    | 33487 | 24581262  | 92  |
| Vector-OS-3 | Vector | oho23B    | 33487 | 24581262  | 67  |
| Vector-US-3 | Vector | RpS25     | 41343 | 24645865  | 91  |
| Vector-OS-1 | Vector | RpS25     | 41343 | 24645865  | 45  |
| Mef2-US-2   | Mef2   | RpS25     | 41343 | 24645865  | 45  |
| p38a-3      | p38a   | RpS25     | 41343 | 24645865  | 52  |
| p38b-1      | p38b   | RpS25     | 41343 | 24645865  | 96  |
| p38c-1      | p38c   | RpS25     | 41343 | 24645865  | 48  |
| p38c-3      | p38c   | RpS25     | 41343 | 24645865  | 45  |
| p38c-4      | p38c   | RpS25     | 41343 | 24645865  | 47  |
| Vector-US-3 | Vector | CG16903   | 31178 | 18921115  | 90  |
| Vector-US-3 | Vector | Zasp52    | 36740 | 281363453 | 85  |
| Vector-OS-1 | Vector | Zasp52    | 36740 | 281363453 | 165 |
| Vector-US-3 | Vector | RpS23     | 36576 | 22024141  | 81  |
| Vector-HS-1 | Vector | RpS23     | 36576 | 22024141  | 85  |
| Vector-OS-1 | Vector | RpS23     | 36576 | 22024141  | 96  |
| Vector-OS-2 | Vector | RpS23     | 36576 | 22024141  | 69  |
| p38a-1      | p38a   | RpS23     | 36576 | 22024141  | 78  |
| p38a-2      | p38a   | RpS23     | 36576 | 22024141  | 102 |
| p38a-3      | p38a   | RpS23     | 36576 | 22024141  | 91  |
| p38a-4      | p38a   | RpS23     | 36576 | 22024141  | 113 |
| p38c-1      | p38c   | RpS23     | 36576 | 22024141  | 84  |
| p38c-2      | p38c   | RpS23     | 36576 | 22024141  | 73  |

|             |        |           |       |           |     |
|-------------|--------|-----------|-------|-----------|-----|
| p38c-4      | p38c   | RpS23     | 36576 | 22024141  | 96  |
| Vector-US-3 | Vector | Rsf1      | 34370 | 24583292  | 77  |
| Vector-US-3 | Vector | RpS26     | 35098 | 17647893  | 77  |
| Vector-HS-1 | Vector | RpS26     | 35098 | 17647893  | 52  |
| Vector-OS-1 | Vector | RpS26     | 35098 | 17647893  | 110 |
| Vector-OS-3 | Vector | RpS26     | 35098 | 17647893  | 69  |
| p38a-3      | p38a   | RpS26     | 35098 | 17647893  | 51  |
| p38b-3      | p38b   | RpS26     | 35098 | 17647893  | 46  |
| Vector-US-3 | Vector | RpS5a     | 32700 | 17647897  | 76  |
| Vector-OS-1 | Vector | RpS5a     | 32700 | 17647897  | 107 |
| Vector-OS-2 | Vector | RpS5a     | 32700 | 17647897  | 52  |
| p38b-3      | p38b   | RpS5a     | 32700 | 17647897  | 86  |
| p38b-4      | p38b   | RpS5a     | 32700 | 17647897  | 115 |
| Vector-US-3 | Vector | CG13350   | 36551 | 20129975  | 75  |
| Vector-US-4 | Vector | CG13350   | 36551 | 20129975  | 83  |
| p38b-4      | p38b   | CG13350   | 36551 | 20129975  | 66  |
| p38c-1      | p38c   | CG13350   | 36551 | 20129975  | 82  |
| p38c-2      | p38c   | CG13350   | 36551 | 20129975  | 74  |
| p38c-3      | p38c   | CG13350   | 36551 | 20129975  | 84  |
| p38c-4      | p38c   | CG13350   | 36551 | 20129975  | 75  |
| Vector-US-3 | Vector | ldh       | 44291 | 24660849  | 75  |
| Vector-US-4 | Vector | ldh       | 44291 | 21356561  | 63  |
| Vector-OS-1 | Vector | ldh       | 44291 | 21356561  | 100 |
| p38c-3      | p38c   | ldh       | 44291 | 21356561  | 68  |
| Vector-US-3 | Vector | Rbp1-like | 32293 | 24641772  | 71  |
| Vector-HS-1 | Vector | Rbp1-like | 32293 | 24641772  | 51  |
| Mef2-US-1   | Mef2   | Rbp1-like | 32293 | 24641772  | 63  |
| p38a-2      | p38a   | Rbp1-like | 32293 | 24641772  | 66  |
| p38a-3      | p38a   | Rbp1-like | 32293 | 24641772  | 59  |
| p38a-4      | p38a   | Rbp1-like | 32293 | 24641772  | 63  |
| p38b-1      | p38b   | Rbp1-like | 32293 | 24641772  | 119 |
| p38b-3      | p38b   | Rbp1-like | 32293 | 24641772  | 59  |
| Vector-US-3 | Vector | cno       | 40620 | 24644125  | 71  |
| p38a-2      | p38a   | cno       | 40620 | 24644125  | 57  |
| p38c-4      | p38c   | cno       | 40620 | 24644125  | 72  |
| Vector-US-3 | Vector | Rack1     | 34070 | 17137396  | 71  |
| Vector-US-4 | Vector | Rack1     | 34070 | 17137396  | 53  |
| Vector-OS-1 | Vector | Rack1     | 34070 | 17137396  | 84  |
| p38a-3      | p38a   | Rack1     | 34070 | 17137396  | 108 |
| p38b-2      | p38b   | Rack1     | 34070 | 17137396  | 56  |
| p38c-3      | p38c   | Rack1     | 34070 | 17137396  | 53  |
| Vector-US-3 | Vector | CG30115   | 37134 | 281363682 | 70  |
| Vector-US-3 | Vector | AP-50     | 42642 | 24649014  | 63  |
| Vector-OS-1 | Vector | AP-50     | 42642 | 24649014  | 74  |
| Vector-US-3 | Vector | Fip1      | 40569 | 24644016  | 62  |
| Vector-US-4 | Vector | Fip1      | 40569 | 24644016  | 66  |
| Vector-OS-3 | Vector | Fip1      | 40569 | 24644016  | 64  |



|             |        |           |         |           |     |
|-------------|--------|-----------|---------|-----------|-----|
| p38a-2      | p38a   | Fip1      | 40569   | 24644016  | 59  |
| p38a-3      | p38a   | Fip1      | 40569   | 24644016  | 63  |
| p38a-4      | p38a   | Fip1      | 40569   | 24644016  | 64  |
| p38b-3      | p38b   | Fip1      | 40569   | 24644016  | 103 |
| p38b-4      | p38b   | Fip1      | 40569   | 24644016  | 58  |
| p38c-1      | p38c   | Fip1      | 40569   | 24644016  | 64  |
| p38c-2      | p38c   | Fip1      | 40569   | 24644016  | 65  |
| p38c-3      | p38c   | Fip1      | 40569   | 24644016  | 62  |
| p38c-4      | p38c   | Fip1      | 40569   | 24644016  | 80  |
| Vector-US-3 | Vector | eIF-2beta | 39433   | 17647377  | 61  |
| Vector-HS-1 | Vector | eIF-2beta | 39433   | 17647377  | 67  |
| Vector-OS-1 | Vector | eIF-2beta | 39433   | 17647377  | 172 |
| p38a-2      | p38a   | eIF-2beta | 39433   | 17647377  | 80  |
| p38c-4      | p38c   | eIF-2beta | 39433   | 17647377  | 60  |
| Vector-US-3 | Vector | Rpl38     | 3355144 | 116007488 | 60  |
| p38a-1      | p38a   | Rpl38     | 3355144 | 116007488 | 51  |
| p38a-3      | p38a   | Rpl38     | 3355144 | 116007488 | 54  |
| p38a-4      | p38a   | Rpl38     | 3355144 | 116007488 | 55  |
| Vector-US-3 | Vector | CG2025    | 32143   | 24641429  | 60  |
| Vector-US-3 | Vector | Txl       | 38646   | 24658597  | 60  |
| Vector-US-4 | Vector | Txl       | 38646   | 24658597  | 58  |
| p38a-2      | p38a   | Txl       | 38646   | 24658597  | 36  |
| p38a-3      | p38a   | Txl       | 38646   | 24658597  | 45  |
| p38b-2      | p38b   | Txl       | 38646   | 24658597  | 59  |
| p38b-3      | p38b   | Txl       | 38646   | 24658597  | 71  |
| p38b-4      | p38b   | Txl       | 38646   | 24658597  | 81  |
| p38c-1      | p38c   | Txl       | 38646   | 24658597  | 134 |
| p38c-2      | p38c   | Txl       | 38646   | 24658597  | 124 |
| p38c-3      | p38c   | Txl       | 38646   | 24658597  | 197 |
| p38c-4      | p38c   | Txl       | 38646   | 24658597  | 110 |
| Vector-US-3 | Vector | mRpl24    | 33703   | 17647677  | 59  |
| Vector-US-3 | Vector | SC35      | 53444   | 21358099  | 59  |
| Vector-OS-1 | Vector | SC35      | 53444   | 21358099  | 57  |
| p38c-3      | p38c   | SC35      | 53444   | 21358099  | 45  |
| p38c-4      | p38c   | SC35      | 53444   | 21358099  | 91  |
| Vector-US-3 | Vector | CG12608   | 32463   | 18859719  | 59  |
| Vector-OS-3 | Vector | CG12608   | 32463   | 18859719  | 58  |
| p38c-3      | p38c   | CG12608   | 32463   | 18859719  | 62  |
| Vector-US-3 | Vector | Rpl29     | 37430   | 17137274  | 57  |
| Vector-US-4 | Vector | Rpl29     | 37430   | 17137274  | 47  |
| Vector-OS-1 | Vector | Rpl29     | 37430   | 17137274  | 45  |
| p38a-2      | p38a   | Rpl29     | 37430   | 17137274  | 44  |
| p38a-3      | p38a   | Rpl29     | 37430   | 17137274  | 56  |
| Vector-US-3 | Vector | skpA      | 31016   | 17137600  | 55  |
| Vector-US-3 | Vector | CG11586   | 38520   | 21355873  | 54  |
| Vector-US-3 | Vector | CG10262   | 35257   | 24585303  | 54  |
| Vector-US-3 | Vector | RpS16     | 37580   | 19922746  | 52  |

|             |        |           |       |          |     |
|-------------|--------|-----------|-------|----------|-----|
| Vector-US-4 | Vector | RpS16     | 37580 | 19922746 | 49  |
| Vector-HS-1 | Vector | RpS16     | 37580 | 19922746 | 70  |
| Vector-OS-1 | Vector | RpS16     | 37580 | 19922746 | 45  |
| Mef2-US-2   | Mef2   | RpS16     | 37580 | 19922746 | 51  |
| Vector-US-3 | Vector | RpS15Aa   | 44150 | 17975567 | 49  |
| Vector-US-4 | Vector | RpS15Aa   | 44150 | 17975567 | 76  |
| Vector-HS-1 | Vector | RpS15Aa   | 44150 | 17975567 | 72  |
| Mef2-US-2   | Mef2   | RpS15Aa   | 44150 | 17975567 | 59  |
| p38a-1      | p38a   | RpS15Aa   | 44150 | 17975567 | 48  |
| p38a-2      | p38a   | RpS15Aa   | 44150 | 17975567 | 34  |
| p38a-3      | p38a   | RpS15Aa   | 44150 | 17975567 | 46  |
| p38c-1      | p38c   | RpS15Aa   | 44150 | 17975567 | 85  |
| p38c-4      | p38c   | RpS15Aa   | 44150 | 17975567 | 47  |
| Vector-US-3 | Vector | CG5366    | 34403 | 19921068 | 48  |
| Vector-US-4 | Vector | CG5366    | 34403 | 19921068 | 46  |
| p38b-3      | p38b   | CG5366    | 34403 | 19921068 | 47  |
| p38c-4      | p38c   | CG5366    | 34403 | 19921068 | 48  |
| Vector-US-3 | Vector | CG6084    | 39304 | 24662781 | 48  |
| p38a-2      | p38a   | CG6084    | 39304 | 24662781 | 39  |
| Vector-US-3 | Vector | RpL13     | 34329 | 17647879 | 47  |
| Vector-OS-1 | Vector | RpL13     | 34329 | 17647879 | 143 |
| Vector-US-3 | Vector | D1        | 41095 | 24645272 | 46  |
| p38a-2      | p38a   | D1        | 41095 | 24645272 | 43  |
| p38a-4      | p38a   | D1        | 41095 | 24645272 | 62  |
| Vector-US-3 | Vector | Aats-gln  | 45786 | 17864488 | 46  |
| Vector-US-4 | Vector | Aats-gln  | 45786 | 17864488 | 107 |
| Vector-HS-1 | Vector | Aats-gln  | 45786 | 17864488 | 130 |
| Vector-OS-1 | Vector | Aats-gln  | 45786 | 17864488 | 159 |
| Vector-OS-2 | Vector | Aats-gln  | 45786 | 17864488 | 81  |
| Vector-OS-3 | Vector | Aats-gln  | 45786 | 17864488 | 54  |
| Mef2-US-2   | Mef2   | Aats-gln  | 45786 | 17864488 | 99  |
| p38a-2      | p38a   | Aats-gln  | 45786 | 17864488 | 104 |
| p38b-3      | p38b   | Aats-gln  | 45786 | 17864488 | 110 |
| p38b-4      | p38b   | Aats-gln  | 45786 | 17864488 | 147 |
| p38c-1      | p38c   | Aats-gln  | 45786 | 17864488 | 110 |
| p38c-2      | p38c   | Aats-gln  | 45786 | 17864488 | 76  |
| p38c-3      | p38c   | Aats-gln  | 45786 | 17864488 | 132 |
| p38c-4      | p38c   | Aats-gln  | 45786 | 17864488 | 152 |
| Vector-US-3 | Vector | CG3011    | 31524 | 24640005 | 46  |
| Vector-US-3 | Vector | RpS13     | 34149 | 17136832 | 46  |
| Vector-OS-1 | Vector | RpS13     | 34149 | 17136832 | 94  |
| Vector-US-3 | Vector | CG6481    | 32843 | 20129043 | 46  |
| Vector-US-3 | Vector | Trxr-1    | 31760 | 24640549 | 45  |
| Vector-US-3 | Vector | Prosbeta5 | 45269 | 21355573 | 45  |
| Vector-US-4 | Vector | Prosbeta5 | 45269 | 21355573 | 83  |
| p38a-2      | p38a   | Prosbeta5 | 45269 | 21355573 | 46  |
| p38a-3      | p38a   | Prosbeta5 | 45269 | 21355573 | 107 |

|             |        |            |         |          |     |
|-------------|--------|------------|---------|----------|-----|
| p38a-4      | p38a   | Prosbeta5  | 45269   | 21355573 | 110 |
| p38c-4      | p38c   | Prosbeta5  | 45269   | 21355573 | 108 |
| Vector-US-4 | Vector | Hsc70-1    | 39542   | 17647515 | 343 |
| p38c-2      | p38c   | Hsc70-1    | 39542   | 17647515 | 435 |
| Vector-US-4 | Vector | snama      | 37857   | 19922884 | 188 |
| Vector-OS-1 | Vector | snama      | 37857   | 19922884 | 206 |
| Vector-OS-2 | Vector | snama      | 37857   | 19922884 | 58  |
| p38a-1      | p38a   | snama      | 37857   | 19922884 | 28  |
| p38a-2      | p38a   | snama      | 37857   | 19922884 | 42  |
| p38a-4      | p38a   | snama      | 37857   | 19922884 | 61  |
| p38c-3      | p38c   | snama      | 37857   | 19922884 | 47  |
| Vector-US-4 | Vector | LKR        | 34064   | 23397395 | 126 |
| p38a-4      | p38a   | LKR        | 34064   | 23397395 | 71  |
| p38b-3      | p38b   | LKR        | 34064   | 23397395 | 50  |
| p38c-2      | p38c   | LKR        | 34064   | 23397395 | 95  |
| p38c-3      | p38c   | LKR        | 34064   | 23397395 | 76  |
| p38c-4      | p38c   | LKR        | 34064   | 23397395 | 93  |
| Vector-US-4 | Vector | sle        | 41262   | 24645663 | 120 |
| p38c-2      | p38c   | sle        | 41262   | 24645663 | 141 |
| Vector-US-4 | Vector | CG4038     | 37397   | 17137002 | 120 |
| Vector-OS-1 | Vector | CG4038     | 37397   | 17137002 | 101 |
| p38b-2      | p38b   | CG4038     | 37397   | 17137002 | 49  |
| p38b-3      | p38b   | CG4038     | 37397   | 17137002 | 72  |
| p38c-2      | p38c   | CG4038     | 37397   | 17137002 | 73  |
| p38c-3      | p38c   | CG4038     | 37397   | 17137002 | 106 |
| Vector-US-4 | Vector | Rpd3       | 38565   | 24657891 | 80  |
| Mef2-US-2   | Mef2   | Rpd3       | 38565   | 24657891 | 164 |
| Vector-US-4 | Vector | CG17514    | 3355040 | 62862338 | 76  |
| Vector-US-4 | Vector | I(2)NC136  | 35501   | 19921660 | 71  |
| Vector-OS-2 | Vector | I(2)NC136  | 35501   | 19921660 | 65  |
| p38a-1      | p38a   | I(2)NC136  | 35501   | 19921660 | 92  |
| p38a-2      | p38a   | I(2)NC136  | 35501   | 19921660 | 74  |
| p38a-4      | p38a   | I(2)NC136  | 35501   | 19921660 | 54  |
| p38b-2      | p38b   | I(2)NC136  | 35501   | 19921660 | 80  |
| p38c-2      | p38c   | I(2)NC136  | 35501   | 19921660 | 81  |
| p38c-3      | p38c   | I(2)NC136  | 35501   | 19921660 | 58  |
| p38c-4      | p38c   | I(2)NC136  | 35501   | 19921660 | 67  |
| Vector-US-4 | Vector | Ski6       | 34721   | 24584046 | 67  |
| Vector-OS-1 | Vector | Ski6       | 34721   | 24584046 | 98  |
| p38c-3      | p38c   | Ski6       | 34721   | 24584046 | 87  |
| p38c-4      | p38c   | Ski6       | 34721   | 24584046 | 98  |
| Vector-US-4 | Vector | MTA1-like  | 40693   | 24644343 | 66  |
| Vector-US-4 | Vector | CG2199     | 38159   | 20130427 | 65  |
| Vector-US-4 | Vector | Glycogenin | 37419   | 24656813 | 64  |
| p38b-1      | p38b   | Glycogenin | 37419   | 24656813 | 203 |
| p38b-2      | p38b   | Glycogenin | 37419   | 24656813 | 138 |
| p38b-3      | p38b   | Glycogenin | 37419   | 24656813 | 366 |

|             |        |            |       |           |     |
|-------------|--------|------------|-------|-----------|-----|
| p38b-4      | p38b   | Glycogenin | 37419 | 24656813  | 186 |
| Vector-US-4 | Vector | CG5146     | 38630 | 24658459  | 64  |
| Vector-US-4 | Vector | 128up      | 36288 | 17981711  | 60  |
| p38a-2      | p38a   | 128up      | 36288 | 17981711  | 49  |
| Vector-US-4 | Vector | bys        | 31701 | 24640439  | 60  |
| Vector-US-4 | Vector | RpL36      | 31009 | 17136318  | 57  |
| Vector-OS-1 | Vector | RpL36      | 31009 | 17136318  | 150 |
| Vector-OS-2 | Vector | RpL36      | 31009 | 17136318  | 49  |
| Vector-OS-3 | Vector | RpL36      | 31009 | 17136318  | 49  |
| Vector-US-4 | Vector | Dmn        | 44086 | 17933688  | 57  |
| Vector-OS-1 | Vector | Dmn        | 44086 | 17933688  | 57  |
| p38c-1      | p38c   | Dmn        | 44086 | 17933688  | 62  |
| p38c-2      | p38c   | Dmn        | 44086 | 17933688  | 69  |
| p38c-4      | p38c   | Dmn        | 44086 | 17933688  | 54  |
| Vector-US-4 | Vector | Gfat2      | 43373 | 21357745  | 56  |
| p38c-4      | p38c   | Gfat2      | 43373 | 21357745  | 67  |
| Vector-US-4 | Vector | Mpp6       | 35382 | 28574289  | 56  |
| Vector-US-4 | Vector | Dlic       | 32057 | 18860035  | 55  |
| p38c-4      | p38c   | Dlic       | 32057 | 18860035  | 86  |
| Vector-US-4 | Vector | Upf1       | 32153 | 18859757  | 52  |
| Vector-US-4 | Vector | Top2       | 35225 | 17136538  | 51  |
| Vector-US-4 | Vector | Imp        | 32009 | 17530887  | 49  |
| Vector-US-4 | Vector | AnnX       | 33019 | 17136288  | 49  |
| p38c-1      | p38c   | AnnX       | 33019 | 17136288  | 56  |
| Vector-US-4 | Vector | CG7324     | 40361 | 24668018  | 49  |
| Vector-US-4 | Vector | FK506-bp1  | 41860 | 24647110  | 49  |
| Vector-US-4 | Vector | CG1399     | 35715 | 161076373 | 48  |
| Vector-US-4 | Vector | MED4       | 38799 | 21356995  | 48  |
| Vector-US-4 | Vector | eIF-3p66   | 42789 | 24649360  | 48  |
| Vector-US-4 | Vector | CG10126    | 41579 | 28573019  | 47  |
| p38c-1      | p38c   | CG10126    | 41579 | 28573019  | 45  |
| p38c-2      | p38c   | CG10126    | 41579 | 28573019  | 50  |
| p38c-4      | p38c   | CG10126    | 41579 | 28573019  | 69  |
| Vector-US-4 | Vector | gho        | 33409 | 24581061  | 46  |
| Vector-US-4 | Vector | RpL3       | 41347 | 17737907  | 45  |
| Vector-HS-1 | Vector | RpL3       | 41347 | 24645877  | 161 |
| Vector-OS-1 | Vector | RpL3       | 41347 | 24645877  | 301 |
| Mef2-US-2   | Mef2   | RpL3       | 41347 | 17737907  | 94  |
| p38a-3      | p38a   | RpL3       | 41347 | 17737907  | 56  |
| Vector-HS-1 | Vector | Hsp70Aa    | 48581 | 24646135  | 489 |
| Vector-HS-1 | Vector | sop        | 34309 | 17136734  | 150 |
| Vector-OS-1 | Vector | sop        | 34309 | 17136734  | 123 |
| p38b-1      | p38b   | sop        | 34309 | 17136734  | 51  |
| Vector-HS-1 | Vector | RpL18      | 38794 | 21357009  | 110 |
| Vector-OS-1 | Vector | RpL18      | 38794 | 21357009  | 158 |
| Vector-OS-2 | Vector | RpL18      | 38794 | 21357009  | 46  |
| Vector-HS-1 | Vector | RpL4       | 43349 | 24650747  | 105 |

|             |        |         |         |           |     |
|-------------|--------|---------|---------|-----------|-----|
| Vector-OS-1 | Vector | RpL4    | 43349   | 24650747  | 287 |
| Vector-OS-2 | Vector | RpL4    | 43349   | 24650747  | 120 |
| Vector-HS-1 | Vector | RpL26   | 40060   | 21357853  | 93  |
| Vector-OS-1 | Vector | RpL26   | 40060   | 21357853  | 47  |
| Vector-HS-1 | Vector | RpL10Ab | 39338   | 24662946  | 74  |
| Vector-OS-1 | Vector | RpL10Ab | 39338   | 281366105 | 120 |
| Vector-HS-1 | Vector | CG3689  | 39083   | 21355361  | 73  |
| Vector-HS-1 | Vector | RpL21   | 35453   | 20129705  | 72  |
| Vector-OS-1 | Vector | RpL21   | 35453   | 20129705  | 102 |
| Vector-HS-1 | Vector | RpL8    | 44251   | 17864318  | 70  |
| Vector-OS-1 | Vector | RpL8    | 44251   | 17864318  | 114 |
| Vector-HS-1 | Vector | CG17931 | 8674030 | 24647419  | 65  |
| Vector-HS-1 | Vector | CG30185 | 246507  | 24762316  | 59  |
| Vector-OS-1 | Vector | CG30185 | 246507  | 24762316  | 46  |
| p38a-2      | p38a   | CG30185 | 246507  | 24762316  | 44  |
| Vector-HS-1 | Vector | Clc     | 40221   | 24667294  | 54  |
| Vector-OS-1 | Vector | Clc     | 40221   | 24667294  | 62  |
| Mef2-US-2   | Mef2   | Clc     | 40221   | 24667294  | 74  |
| Vector-HS-1 | Vector | Atx2    | 41883   | 24647162  | 52  |
| Vector-OS-1 | Vector | Atx2    | 41883   | 24647162  | 87  |
| Vector-HS-1 | Vector | RpL6    | 43723   | 21357161  | 51  |
| Vector-OS-1 | Vector | RpL6    | 43723   | 21357161  | 76  |
| Mef2-US-2   | Mef2   | RpL6    | 43723   | 21357161  | 65  |
| Vector-HS-1 | Vector | CG4119  | 31481   | 18857955  | 49  |
| Vector-HS-1 | Vector | RpL31   | 35988   | 19921922  | 48  |
| Vector-OS-1 | Vector | RpL31   | 35988   | 19921922  | 55  |
| Mef2-US-1   | Mef2   | RpL31   | 35988   | 19921922  | 62  |
| p38a-1      | p38a   | RpL31   | 35988   | 19921922  | 39  |
| p38a-4      | p38a   | RpL31   | 35988   | 19921922  | 47  |
| p38b-4      | p38b   | RpL31   | 35988   | 19921922  | 48  |
| p38c-4      | p38c   | RpL31   | 35988   | 19921922  | 57  |
| Vector-HS-1 | Vector | RpS18   | 37292   | 17136882  | 46  |
| Vector-OS-1 | Vector | RpS18   | 37292   | 17136882  | 163 |
| Mef2-US-1   | Mef2   | RpS18   | 37292   | 17136882  | 56  |
| Mef2-US-2   | Mef2   | RpS18   | 37292   | 17136882  | 48  |
| p38a-1      | p38a   | RpS18   | 37292   | 17136882  | 51  |
| p38a-4      | p38a   | RpS18   | 37292   | 17136882  | 62  |
| Vector-HS-1 | Vector | Slbp    | 43448   | 17137748  | 45  |
| Vector-OS-1 | Vector | CG33123 | 326262  | 28574733  | 221 |
| Vector-OS-2 | Vector | CG33123 | 326262  | 28574733  | 85  |
| Vector-OS-1 | Vector | Dis3    | 42900   | 24649634  | 206 |
| Vector-OS-2 | Vector | Dis3    | 42900   | 24649634  | 94  |
| p38c-2      | p38c   | Dis3    | 42900   | 24649634  | 58  |
| Vector-OS-1 | Vector | CG18178 | 39138   | 24661864  | 152 |
| p38a-1      | p38a   | CG18178 | 39138   | 24661864  | 34  |
| Vector-OS-1 | Vector | Taf2    | 39164   | 24662032  | 137 |
| p38c-1      | p38c   | Taf2    | 39164   | 24662032  | 75  |

|             |        |            |        |           |     |
|-------------|--------|------------|--------|-----------|-----|
| p38c-2      | p38c   | Taf2       | 39164  | 24662032  | 58  |
| p38c-3      | p38c   | Taf2       | 39164  | 24662032  | 60  |
| Vector-OS-1 | Vector | Rat1       | 33964  | 20129299  | 125 |
| Vector-OS-1 | Vector | CG11266    | 33989  | 19920866  | 122 |
| Vector-OS-2 | Vector | CG11266    | 33989  | 19920866  | 70  |
| Vector-OS-1 | Vector | RpL24      | 34754  | 19921254  | 115 |
| Vector-OS-1 | Vector | ns1        | 42060  | 28572990  | 111 |
| Vector-OS-1 | Vector | alpha-Spec | 38231  | 17136504  | 109 |
| p38c-1      | p38c   | alpha-Spec | 38231  | 17136504  | 45  |
| Vector-OS-1 | Vector | kst        | 38418  | 24656802  | 95  |
| Vector-OS-1 | Vector | Srp54      | 34312  | 17137528  | 95  |
| Vector-OS-1 | Vector | RpL17      | 31613  | 18921137  | 90  |
| Vector-OS-2 | Vector | RpL17      | 31613  | 18921137  | 54  |
| Vector-OS-1 | Vector | RpL28      | 38397  | 24656625  | 87  |
| Vector-OS-1 | Vector | CG4679     | 36466  | 24653318  | 86  |
| Vector-OS-1 | Vector | Slu7       | 43427  | 24650922  | 85  |
| p38c-1      | p38c   | Slu7       | 43427  | 24650922  | 48  |
| Vector-OS-1 | Vector | CG9911     | 32588  | 18860011  | 83  |
| Vector-OS-1 | Vector | Nop56      | 42633  | 28572126  | 82  |
| p38a-2      | p38a   | Nop56      | 42633  | 28572126  | 33  |
| p38b-3      | p38b   | Nop56      | 42633  | 28572126  | 130 |
| p38c-3      | p38c   | Nop56      | 42633  | 28572126  | 152 |
| p38c-4      | p38c   | Nop56      | 42633  | 28572126  | 144 |
| Vector-OS-1 | Vector | cora       | 37205  | 24655517  | 80  |
| p38a-2      | p38a   | cora       | 37205  | 24655527  | 40  |
| p38b-1      | p38b   | cora       | 37205  | 24655527  | 37  |
| p38b-3      | p38b   | cora       | 37205  | 24655527  | 49  |
| p38b-4      | p38b   | cora       | 37205  | 24655527  | 49  |
| Vector-OS-1 | Vector | ncd        | 43517  | 17136354  | 77  |
| Vector-OS-2 | Vector | ncd        | 43517  | 17136354  | 46  |
| p38a-3      | p38a   | ncd        | 43517  | 17136354  | 54  |
| Vector-OS-1 | Vector | CG6686     | 34608  | 24583762  | 74  |
| Vector-OS-2 | Vector | CG6686     | 34608  | 24583762  | 61  |
| Vector-OS-3 | Vector | CG6686     | 34608  | 24583762  | 49  |
| p38a-2      | p38a   | CG6686     | 34608  | 24583762  | 39  |
| p38a-3      | p38a   | CG6686     | 34608  | 24583762  | 56  |
| p38b-2      | p38b   | CG6686     | 34608  | 24583762  | 155 |
| p38c-3      | p38c   | CG6686     | 34608  | 24583762  | 180 |
| Vector-OS-1 | Vector | CG3542     | 33513  | 19920620  | 73  |
| Vector-OS-1 | Vector | RpS24      | 37589  | 20130247  | 73  |
| Vector-OS-2 | Vector | RpS24      | 37589  | 20130247  | 54  |
| p38a-1      | p38a   | RpS24      | 37589  | 20130247  | 34  |
| Vector-OS-1 | Vector | RpLP2      | 36855  | 17647887  | 73  |
| Vector-OS-2 | Vector | RpLP2      | 36855  | 17647887  | 63  |
| Vector-OS-1 | Vector | CG31251    | 318645 | 45551915  | 71  |
| Vector-OS-1 | Vector | Rrp6       | 41798  | 161078302 | 68  |
| Vector-OS-1 | Vector | msk        | 44747  | 17864392  | 67  |

|             |        |             |         |          |     |
|-------------|--------|-------------|---------|----------|-----|
| p38c-1      | p38c   | msk         | 44747   | 17864392 | 49  |
| Vector-OS-1 | Vector | RpS12       | 39480   | 24663646 | 66  |
| p38a-2      | p38a   | RpS12       | 39480   | 24663646 | 40  |
| Vector-OS-1 | Vector | Nop60B      | 37873   | 17975520 | 65  |
| p38c-3      | p38c   | Nop60B      | 37873   | 17975520 | 48  |
| Vector-OS-1 | Vector | CG7903      | 43554   | 24651234 | 65  |
| p38a-1      | p38a   | CG7903      | 43554   | 24651234 | 54  |
| p38c-4      | p38c   | CG7903      | 43554   | 24651234 | 69  |
| Vector-OS-1 | Vector | fl(2)d      | 36527   | 24653459 | 64  |
| Vector-OS-1 | Vector | Cyp12d1-p   | 246648  | 24943083 | 64  |
| Vector-OS-1 | Vector | CG4849      | 43358   | 21357743 | 63  |
| Vector-OS-1 | Vector | PH4alphaEFB | 43620   | 24651407 | 62  |
| Vector-OS-1 | Vector | RpL35A      | 40654   | 21356927 | 62  |
| Vector-OS-1 | Vector | p115        | 31698   | 24640430 | 61  |
| Mef2-US-1   | Mef2   | p115        | 31698   | 24640430 | 50  |
| p38c-2      | p38c   | p115        | 31698   | 24640430 | 55  |
| p38c-3      | p38c   | p115        | 31698   | 24640430 | 56  |
| Vector-OS-1 | Vector | Cul-4       | 35780   | 24586500 | 61  |
| Vector-OS-1 | Vector | gammaTub23C | 33501   | 17136618 | 60  |
| Vector-OS-1 | Vector | CG2691      | 32320   | 24641825 | 58  |
| Vector-OS-1 | Vector | U2af50      | 32602   | 17136764 | 57  |
| Vector-OS-1 | Vector | CG7172      | 40395   | 21358081 | 54  |
| p38a-2      | p38a   | CG7172      | 40395   | 21358081 | 34  |
| Vector-OS-1 | Vector | CG8443      | 36793   | 20130037 | 53  |
| p38c-3      | p38c   | CG8443      | 36793   | 20130037 | 51  |
| Vector-OS-1 | Vector | tum         | 36538   | 24653481 | 52  |
| Vector-OS-1 | Vector | CG10576     | 38645   | 24658585 | 52  |
| Vector-OS-1 | Vector | LanA        | 38723   | 17136292 | 50  |
| Vector-OS-1 | Vector | Mtor        | 36264   | 24652825 | 49  |
| Vector-OS-1 | Vector | Or85d       | 41011   | 17986171 | 48  |
| Vector-OS-1 | Vector | CG33310     | 2768910 | 45552391 | 48  |
| Vector-OS-1 | Vector | CG31301     | 41865   | 21357453 | 48  |
| Vector-OS-1 | Vector | Klp61F      | 38135   | 17136642 | 47  |
| Vector-OS-1 | Vector | Rbcn-3B     | 31155   | 24639216 | 47  |
| Vector-OS-1 | Vector | RpS11       | 36321   | 24652922 | 46  |
| Vector-OS-1 | Vector | CG6693      | 41346   | 21356411 | 46  |
| Vector-OS-1 | Vector | cpb         | 33346   | 17136938 | 46  |
| Vector-OS-1 | Vector | ebi         | 33212   | 17137500 | 46  |
| Vector-OS-1 | Vector | ns3         | 31097   | 18543229 | 45  |
| Vector-OS-1 | Vector | Femcoat     | 31367   | 24639645 | 45  |
| Vector-OS-1 | Vector | CG6937      | 42662   | 24649072 | 45  |
| Vector-OS-3 | Vector | CG2021      | 38229   | 24655606 | 76  |
| p38c-2      | p38c   | CG2021      | 38229   | 24655606 | 80  |
| p38c-4      | p38c   | CG2021      | 38229   | 24655606 | 82  |
| Vector-OS-3 | Vector | poe         | 46243   | 17352461 | 56  |
| p38b-4      | p38b   | poe         | 46243   | 17352461 | 134 |
| p38c-1      | p38c   | poe         | 46243   | 17352461 | 68  |

|           |      |         |      |        |           |      |
|-----------|------|---------|------|--------|-----------|------|
| p38c-3    | p38c | poe     |      | 46243  | 17352461  | 71   |
| p38c-4    | p38c | poe     |      | 46243  | 17352461  | 67   |
| Mef2-US-1 | Mef2 | HDAC4   |      | 32278  | 281360799 | 798  |
| Mef2-US-2 | Mef2 | HDAC4   |      | 32278  | 281360799 | 1031 |
| Mef2-US-1 | Mef2 | Mef2    | Mef2 |        | 17136964  | 724  |
| Mef2-US-2 | Mef2 | Mef2    | Mef2 |        | 17136964  | 905  |
| Mef2-US-1 | Mef2 | CtBP    |      | 41602  | 24646446  | 372  |
| Mef2-US-2 | Mef2 | CtBP    |      | 41602  | 24646446  | 234  |
| Mef2-US-1 | Mef2 | Roe1    |      | 36508  | 24653432  | 96   |
| p38c-4    | p38c | Roe1    |      | 36508  | 24653432  | 89   |
| Mef2-US-1 | Mef2 | vir     |      | 47869  | 17864576  | 58   |
| p38a-4    | p38a | vir     |      | 47869  | 17864576  | 68   |
| Mef2-US-1 | Mef2 | bsk     |      | 44801  | 24583285  | 48   |
| p38a-1    | p38a | bsk     |      | 44801  | 24583285  | 48   |
| p38a-2    | p38a | bsk     |      | 44801  | 24583285  | 47   |
| p38a-3    | p38a | bsk     |      | 44801  | 24583285  | 53   |
| p38a-4    | p38a | bsk     |      | 44801  | 24583285  | 53   |
| p38b-1    | p38b | bsk     |      | 44801  | 24583285  | 49   |
| p38b-2    | p38b | bsk     |      | 44801  | 24583285  | 49   |
| p38b-3    | p38b | bsk     |      | 44801  | 24583285  | 48   |
| Mef2-US-1 | Mef2 | CG1646  |      | 43399  | 21357975  | 46   |
| p38b-4    | p38b | CG1646  |      | 43399  | 161078721 | 94   |
| p38c-1    | p38c | CG1646  |      | 43399  | 161078721 | 70   |
| p38c-2    | p38c | CG1646  |      | 43399  | 161078721 | 90   |
| p38c-3    | p38c | CG1646  |      | 43399  | 21357975  | 156  |
| Mef2-US-1 | Mef2 | CG16972 |      | 34715  | 24584030  | 45   |
| Mef2-US-2 | Mef2 | brm     |      | 39744  | 17985967  | 63   |
| Mef2-US-2 | Mef2 | endos   |      | 39554  | 24664029  | 62   |
| Mef2-US-2 | Mef2 | CG11227 |      | 33071  | 20129097  | 50   |
| Mef2-US-2 | Mef2 | CG17293 |      | 34153  | 19920938  | 50   |
| Mef2-US-2 | Mef2 | CG3760  |      | 37987  | 24762790  | 49   |
| p38a-3    | p38a | CG3760  |      | 37987  | 24762790  | 46   |
| Mef2-US-2 | Mef2 | CG31678 |      | 35327  | 221510664 | 49   |
| Mef2-US-2 | Mef2 | SRPK    |      | 36706  | 24653847  | 48   |
| Mef2-US-2 | Mef2 | CG12264 |      | 34613  | 20129463  | 48   |
| p38a-1    | p38a | Mpk2    | p38a |        | 17137202  | 611  |
| p38a-2    | p38a | Mpk2    | p38a |        | 17137202  | 726  |
| p38a-3    | p38a | Mpk2    | p38a |        | 17137202  | 646  |
| p38a-4    | p38a | Mpk2    | p38a |        | 17137202  | 656  |
| p38a-1    | p38a | CG2852  |      | 37591  | 20130249  | 84   |
| p38c-1    | p38c | CG2852  |      | 37591  | 20130249  | 66   |
| p38a-1    | p38a | CG15220 |      | 32113  | 24641344  | 78   |
| p38a-1    | p38a | CG30100 |      | 246457 | 24654113  | 76   |
| p38a-1    | p38a | CG9586  |      | 34241  | 19920990  | 64   |
| p38b-1    | p38b | CG9586  |      | 34241  | 19920990  | 34   |
| p38a-1    | p38a | CG16935 |      | 36540  | 45550423  | 58   |
| p38a-2    | p38a | CG16935 |      | 36540  | 45550423  | 42   |



|        |      |             |         |           |     |
|--------|------|-------------|---------|-----------|-----|
| p38a-1 | p38a | CG33129     | 34514   | 28574516  | 48  |
| p38c-4 | p38c | CG33129     | 34514   | 28574516  | 46  |
| p38a-1 | p38a | CG17082     | 3355133 | 116007516 | 45  |
| p38a-1 | p38a | CG9372      | 40137   | 21357465  | 42  |
| p38c-4 | p38c | CG9372      | 40137   | 21357465  | 48  |
| p38a-1 | p38a | peb         | 31391   | 56292493  | 41  |
| p38a-1 | p38a | RfC4        | 38492   | 17647857  | 39  |
| p38a-4 | p38a | RfC4        | 38492   | 17647857  | 64  |
| p38b-3 | p38b | RfC4        | 38492   | 17647857  | 51  |
| p38a-1 | p38a | CG42331     | 42948   | 24649775  | 38  |
| p38a-1 | p38a | CG15446     | 33088   | 281361174 | 38  |
| p38a-1 | p38a | CG13894     | 38086   | 24654848  | 38  |
| p38a-2 | p38a | CG13894     | 38086   | 24654848  | 39  |
| p38b-1 | p38b | CG13894     | 38086   | 24654848  | 39  |
| p38a-1 | p38a | ATPsyn-beta | 43829   | 24638766  | 37  |
| p38a-1 | p38a | CG12547     | 3355145 | 116007528 | 35  |
| p38a-1 | p38a | Rpt3R       | 41190   | 281361487 | 35  |
| p38a-1 | p38a | Ranbp9      | 41367   | 21356539  | 34  |
| p38a-1 | p38a | CG11327     | 33940   | 20129291  | 34  |
| p38a-1 | p38a | CG30284     | 246527  | 24657170  | 33  |
| p38a-1 | p38a | msb1l       | 35254   | 19921554  | 32  |
| p38a-2 | p38a | msb1l       | 35254   | 19921554  | 42  |
| p38a-1 | p38a | Taf5        | 47900   | 17136870  | 32  |
| p38a-1 | p38a | RnrL        | 34392   | 17352481  | 32  |
| p38a-1 | p38a | CG15740     | 32139   | 24641420  | 32  |
| p38a-1 | p38a | CG7183      | 42181   | 24647873  | 31  |
| p38a-1 | p38a | Nup358      | 43041   | 45550830  | 30  |
| p38a-2 | p38a | Nup358      | 43041   | 45550830  | 28  |
| p38a-2 | p38a | CG11148     | 43842   | 281359566 | 133 |
| p38a-2 | p38a | Arp87C      | 41566   | 24646371  | 76  |
| p38a-2 | p38a | CG1092      | 40538   | 24643881  | 75  |
| p38a-3 | p38a | CG1092      | 40538   | 24643881  | 61  |
| p38a-2 | p38a | CG6617      | 32852   | 24643081  | 56  |
| p38c-2 | p38c | CG6617      | 32852   | 24643081  | 48  |
| p38a-2 | p38a | Cyt-c-p     | 34996   | 17137228  | 53  |
| p38a-2 | p38a | CG31800     | 318947  | 24585104  | 49  |
| p38c-2 | p38c | CG31800     | 318947  | 24585104  | 47  |
| p38c-3 | p38c | CG31800     | 318947  | 24585104  | 50  |
| p38c-4 | p38c | CG31800     | 318947  | 24585104  | 58  |
| p38a-2 | p38a | CG12592     | 41263   | 24645669  | 48  |
| p38a-2 | p38a | shi         | 45928   | 24642336  | 45  |
| p38c-4 | p38c | shi         | 45928   | 24642336  | 55  |
| p38a-2 | p38a | trus        | 41540   | 24646312  | 45  |
| p38a-2 | p38a | Cap-D3      | 33778   | 24581942  | 44  |
| p38a-3 | p38a | Cap-D3      | 33778   | 24581942  | 46  |
| p38b-1 | p38b | Cap-D3      | 33778   | 24581942  | 47  |
| p38b-2 | p38b | Cap-D3      | 33778   | 24581942  | 49  |

|        |      |         |         |           |     |
|--------|------|---------|---------|-----------|-----|
| p38b-3 | p38b | Cap-D3  | 33778   | 24581942  | 49  |
| p38b-4 | p38b | Cap-D3  | 33778   | 24581942  | 47  |
| p38a-2 | p38a | CG4511  | 41305   | 21356365  | 43  |
| p38a-2 | p38a | CG9331  | 35347   | 24585514  | 40  |
| p38a-2 | p38a | CG12269 | 42271   | 24648097  | 39  |
| p38a-2 | p38a | CG1890  | 43737   | 21357149  | 39  |
| p38a-2 | p38a | CG9975  | 37220   | 20130151  | 37  |
| p38b-1 | p38b | CG9975  | 37220   | 20130151  | 39  |
| p38a-2 | p38a | CG11423 | 36998   | 45550452  | 36  |
| p38a-2 | p38a | CG14574 | 40397   | 24668241  | 36  |
| p38a-2 | p38a | Myo31DF | 34445   | 17647709  | 36  |
| p38a-2 | p38a | CG5953  | 34985   | 281365078 | 36  |
| p38a-2 | p38a | CG31782 | 318938  | 24584665  | 36  |
| p38a-2 | p38a | CG11617 | 33183   | 19920444  | 35  |
| p38a-2 | p38a | blos1   | 246439  | 281363363 | 34  |
| p38a-2 | p38a | Actn    | 31166   | 17137758  | 34  |
| p38a-2 | p38a | CG4673  | 43091   | 62484318  | 34  |
| p38b-3 | p38b | CG4673  | 43091   | 62484318  | 64  |
| p38c-2 | p38c | CG4673  | 43091   | 62484318  | 50  |
| p38a-2 | p38a | CG10265 | 36676   | 19922300  | 33  |
| p38a-2 | p38a | CG34252 | 5740769 | 161084750 | 33  |
| p38b-1 | p38b | CG34252 | 5740769 | 161084750 | 37  |
| p38a-2 | p38a | Mhcl    | 41955   | 24647351  | 33  |
| p38a-2 | p38a | Snoo    | 5740414 | 161076790 | 33  |
| p38a-2 | p38a | CG10418 | 39408   | 21358381  | 33  |
| p38b-4 | p38b | CG10418 | 39408   | 21358381  | 56  |
| p38a-2 | p38a | CG10157 | 42788   | 21355397  | 33  |
| p38b-1 | p38b | CG10157 | 42788   | 21355397  | 33  |
| p38a-2 | p38a | CG34164 | 5740394 | 161076882 | 33  |
| p38a-2 | p38a | Hsp67Ba | 39076   | 17647523  | 32  |
| p38a-2 | p38a | inaE    | 32343   | 28571183  | 32  |
| p38a-2 | p38a | d       | 34179   | 28574077  | 31  |
| p38a-2 | p38a | CG8486  | 34112   | 281364605 | 31  |
| p38a-2 | p38a | CG4877  | 39821   | 24665295  | 31  |
| p38a-2 | p38a | lqf     | 38846   | 24660212  | 31  |
| p38a-2 | p38a | Msp-300 | 3771968 | 161076702 | 29  |
| p38a-2 | p38a | shot    | 36542   | 221330227 | 29  |
| p38a-2 | p38a | Rpl135  | 33210   | 17136446  | 29  |
| p38a-3 | p38a | rad50   | 37564   | 281364022 | 159 |
| p38b-3 | p38b | rad50   | 37564   | 281364022 | 55  |
| p38b-4 | p38b | rad50   | 37564   | 281364022 | 64  |
| p38c-2 | p38c | rad50   | 37564   | 281364022 | 98  |
| p38a-3 | p38a | ps      | 44258   | 24645366  | 125 |
| p38b-3 | p38b | ps      | 44258   | 24645366  | 102 |
| p38b-4 | p38b | ps      | 44258   | 24645368  | 85  |
| p38c-1 | p38c | ps      | 44258   | 24645366  | 70  |
| p38c-3 | p38c | ps      | 44258   | 24645366  | 106 |

|        |      |           |       |           |      |
|--------|------|-----------|-------|-----------|------|
| p38c-4 | p38c | ps        | 44258 | 24645366  | 83   |
| p38a-3 | p38a | Aac11     | 35053 | 17137712  | 74   |
| p38a-3 | p38a | msn       | 44030 | 45549251  | 71   |
| p38a-3 | p38a | Dek       | 47906 | 21356855  | 68   |
| p38a-3 | p38a | CG1868    | 35985 | 19921918  | 52   |
| p38a-4 | p38a | Ubp64E    | 38644 | 24658569  | 70   |
| p38a-4 | p38a | Aats-gly  | 39644 | 24664462  | 68   |
| p38a-4 | p38a | Vha44     | 36826 | 17137392  | 68   |
| p38a-4 | p38a | l(2)35Bg  | 49424 | 17933742  | 66   |
| p38a-4 | p38a | CG5794    | 42935 | 24649731  | 64   |
| p38a-4 | p38a | Mcm6      | 31603 | 17530827  | 62   |
| p38a-4 | p38a | Bet5      | 43590 | 24651330  | 48   |
| p38a-4 | p38a | RpL14     | 38983 | 17647881  | 47   |
| p38a-4 | p38a | CG12096   | 32269 | 45549365  | 45   |
| p38b-1 | p38b | MAPk-Ak2  | 44573 | 17864380  | 1148 |
| p38b-2 | p38b | MAPk-Ak2  | 44573 | 17864380  | 671  |
| p38b-3 | p38b | MAPk-Ak2  | 44573 | 17864380  | 1262 |
| p38b-4 | p38b | MAPk-Ak2  | 44573 | 17864380  | 1058 |
| p38b-1 | p38b | CG6904    | 41823 | 21357845  | 762  |
| p38b-2 | p38b | CG6904    | 41823 | 21357845  | 763  |
| p38b-3 | p38b | CG6904    | 41823 | 21357845  | 1427 |
| p38b-4 | p38b | CG6904    | 41823 | 21357845  | 1301 |
| p38b-1 | p38b | Clbn      | 43018 | 281362528 | 269  |
| p38b-2 | p38b | Clbn      | 43018 | 281362528 | 290  |
| p38b-3 | p38b | Clbn      | 43018 | 281362528 | 503  |
| p38b-4 | p38b | Clbn      | 43018 | 281362528 | 668  |
| p38b-1 | p38b | lic       | 32257 | 17137200  | 180  |
| p38b-2 | p38b | lic       | 32257 | 17137200  | 88   |
| p38b-4 | p38b | lic       | 32257 | 17137200  | 65   |
| p38b-1 | p38b | Act79B    | 40444 | 17975540  | 124  |
| p38b-1 | p38b | eRF1      | 40240 | 21356433  | 78   |
| p38b-4 | p38b | eRF1      | 40240 | 21356433  | 49   |
| p38b-1 | p38b | PTP-ER    | 37461 | 24657148  | 61   |
| p38b-2 | p38b | PTP-ER    | 37461 | 24657148  | 57   |
| p38b-4 | p38b | PTP-ER    | 37461 | 24657148  | 59   |
| p38b-1 | p38b | GABA-B-R2 | 42561 | 17738103  | 47   |
| p38b-1 | p38b | CG2857    | 37983 | 20130387  | 44   |
| p38b-4 | p38b | CG2857    | 37983 | 20130387  | 48   |
| p38b-1 | p38b | Nup153    | 32630 | 161077871 | 44   |
| p38b-1 | p38b | wac       | 38044 | 221330713 | 43   |
| p38b-1 | p38b | CG34424   | 37699 | 161077430 | 42   |
| p38b-1 | p38b | ms(3)K81  | 43232 | 24650425  | 42   |
| p38b-1 | p38b | wee       | 33965 | 17136988  | 42   |
| p38b-1 | p38b | dpa       | 35679 | 17137242  | 41   |
| p38c-4 | p38c | dpa       | 35679 | 17137242  | 54   |
| p38b-1 | p38b | CG1801    | 33104 | 221500419 | 41   |
| p38b-1 | p38b | CG10505   | 37428 | 161077321 | 40   |

|        |      |            |         |           |     |
|--------|------|------------|---------|-----------|-----|
| p38b-1 | p38b | Asator     | 43794   | 281359551 | 40  |
| p38b-1 | p38b | CG7337     | 33367   | 116007262 | 39  |
| p38b-1 | p38b | Ncc69      | 39410   | 21358517  | 39  |
| p38b-1 | p38b | Drip       | 36236   | 24652747  | 38  |
| p38b-1 | p38b | pros       | 41363   | 221378762 | 38  |
| p38b-1 | p38b | CG18731    | 59246   | 24651111  | 37  |
| p38b-1 | p38b | gce        | 32457   | 17530943  | 37  |
| p38b-1 | p38b | unc-13     | 43841   | 24638724  | 37  |
| p38b-3 | p38b | unc-13     | 43841   | 24638724  | 60  |
| p38b-1 | p38b | yellow-h   | 43779   | 45550873  | 36  |
| p38b-1 | p38b | NKAIN      | 37979   | 281364250 | 36  |
| p38b-1 | p38b | CG14044    | 33702   | 19920706  | 36  |
| p38b-2 | p38b | CG14044    | 33702   | 19920706  | 53  |
| p38b-1 | p38b | Bap        | 32987   | 17647183  | 36  |
| p38b-1 | p38b | rab3-GAP   | 34626   | 24583816  | 36  |
| p38b-1 | p38b | CG12201    | 41449   | 28571665  | 36  |
| p38b-1 | p38b | Prp18      | 42285   | 21356713  | 36  |
| p38b-1 | p38b | Hmgcr      | 42803   | 24649399  | 35  |
| p38b-1 | p38b | omd        | 41674   | 24646656  | 35  |
| p38b-1 | p38b | RhoGAPp190 | 32743   | 24642824  | 34  |
| p38b-1 | p38b | otu        | 31789   | 24640609  | 34  |
| p38b-2 | p38b | otu        | 31789   | 24640609  | 47  |
| p38b-1 | p38b | UbcD10     | 37035   | 17137640  | 34  |
| p38b-1 | p38b | CanA1      | 43670   | 28571947  | 32  |
| p38b-1 | p38b | CG7358     | 32886   | 24643154  | 32  |
| p38b-1 | p38b | cv-c       | 41749   | 24646827  | 31  |
| p38b-1 | p38b | CG34431    | 5740655 | 161076401 | 31  |
| p38b-1 | p38b | beta4GalT7 | 42991   | 24649875  | 31  |
| p38b-1 | p38b | CG42457    | 8674070 | 281361997 | 31  |
| p38b-1 | p38b | CG31418    | 42084   | 24647652  | 31  |
| p38b-1 | p38b | DIP2       | 252479  | 24654656  | 29  |
| p38b-2 | p38b | Elongin-B  | 42435   | 17738069  | 59  |
| p38b-2 | p38b | alpha-Est7 | 40901   | 17737817  | 52  |
| p38b-2 | p38b | FKBP59     | 47762   | 24583150  | 47  |
| p38b-3 | p38b | puc        | 40958   | 17737839  | 107 |
| p38b-4 | p38b | puc        | 40958   | 17737839  | 96  |
| p38b-3 | p38b | CG5602     | 37791   | 24762424  | 85  |
| p38b-3 | p38b | RfC3       | 34423   | 19921076  | 84  |
| p38c-2 | p38c | RfC3       | 34423   | 19921076  | 64  |
| p38c-4 | p38c | RfC3       | 34423   | 19921076  | 58  |
| p38b-3 | p38b | CG11030    | 33805   | 24582008  | 82  |
| p38b-3 | p38b | CG5721     | 37084   | 19922518  | 81  |
| p38c-3 | p38c | CG5721     | 37084   | 19922518  | 51  |
| p38b-3 | p38b | CG9925     | 41702   | 21358205  | 66  |
| p38b-3 | p38b | AlkB       | 2768870 | 45555401  | 66  |
| p38b-3 | p38b | CG8360     | 34122   | 24582741  | 63  |
| p38b-4 | p38b | CG8360     | 34122   | 24582741  | 62  |

|        |      |         |         |           |     |
|--------|------|---------|---------|-----------|-----|
| p38c-1 | p38c | CG8360  | 34122   | 24582741  | 72  |
| p38c-2 | p38c | CG8360  | 34122   | 24582741  | 73  |
| p38c-3 | p38c | CG8360  | 34122   | 24582741  | 88  |
| p38c-4 | p38c | CG8360  | 34122   | 24582741  | 75  |
| p38b-3 | p38b | ush     | 33225   | 17136578  | 60  |
| p38c-3 | p38c | ush     | 33225   | 17136578  | 58  |
| p38b-3 | p38b | mts     | 45959   | 17136620  | 57  |
| p38b-4 | p38b | mts     | 45959   | 17136620  | 55  |
| p38b-3 | p38b | CG8108  | 39161   | 21355533  | 50  |
| p38c-4 | p38c | CG8108  | 39161   | 21355533  | 47  |
| p38b-3 | p38b | cdc16   | 42753   | 17137612  | 49  |
| p38b-4 | p38b | cdc16   | 42753   | 17137612  | 80  |
| p38b-3 | p38b | CG5726  | 37082   | 20130109  | 49  |
| p38b-3 | p38b | Saf6    | 33255   | 19920480  | 47  |
| p38b-4 | p38b | CG6509  | 34573   | 19921144  | 118 |
| p38c-1 | p38c | CG6509  | 34573   | 19921144  | 52  |
| p38c-2 | p38c | CG6509  | 34573   | 19921144  | 73  |
| p38b-4 | p38b | CG5198  | 34432   | 24583433  | 108 |
| p38c-2 | p38c | CG5198  | 34432   | 24583433  | 70  |
| p38c-3 | p38c | CG5198  | 34432   | 24583433  | 106 |
| p38c-4 | p38c | CG5198  | 34432   | 24583433  | 61  |
| p38b-4 | p38b | CG7518  | 41599   | 281361685 | 86  |
| p38c-3 | p38c | CG7518  | 41599   | 281361685 | 102 |
| p38c-4 | p38c | CG7518  | 41599   | 281361685 | 85  |
| p38b-4 | p38b | Rab1    | 42524   | 24648682  | 67  |
| p38c-1 | p38c | Rab1    | 42524   | 24648682  | 121 |
| p38b-4 | p38b | Dref    | 34328   | 17737403  | 66  |
| p38b-4 | p38b | Atg2    | 38344   | 24656255  | 65  |
| p38b-4 | p38b | CG10214 | 42811   | 21355135  | 61  |
| p38c-1 | p38c | CG10214 | 42811   | 21355135  | 96  |
| p38b-4 | p38b | sec15   | 42499   | 21355951  | 59  |
| p38b-4 | p38b | CG42232 | 7354465 | 221379506 | 51  |
| p38b-4 | p38b | CG3756  | 33712   | 20129237  | 50  |
| p38b-4 | p38b | mbm     | 33194   | 19920452  | 49  |
| p38b-4 | p38b | bur     | 45830   | 281365319 | 48  |
| p38b-4 | p38b | lat     | 36454   | 17136788  | 48  |
| p38c-1 | p38c | p38c    | p38c    | 45553481  | 844 |
| p38c-2 | p38c | p38c    | p38c    | 45553481  | 944 |
| p38c-3 | p38c | p38c    | p38c    | 45553481  | 861 |
| p38c-4 | p38c | p38c    | p38c    | 45553481  | 959 |
| p38c-1 | p38c | SF1     | 43912   | 24647704  | 103 |
| p38c-1 | p38c | CG18259 | 32866   | 24643110  | 87  |
| p38c-1 | p38c | CG11984 | 41082   | 281361403 | 71  |
| p38c-1 | p38c | Rbsn-5  | 34110   | 19920912  | 70  |
| p38c-2 | p38c | Rbsn-5  | 34110   | 19920912  | 79  |
| p38c-1 | p38c | P58IPK  | 41161   | 21355911  | 62  |
| p38c-2 | p38c | P58IPK  | 41161   | 21355911  | 71  |

|        |      |             |         |           |     |
|--------|------|-------------|---------|-----------|-----|
| p38c-1 | p38c | Eno         | 33351   | 17137654  | 61  |
| p38c-1 | p38c | CG6459      | 37006   | 20130085  | 59  |
| p38c-3 | p38c | CG6459      | 37006   | 20130085  | 60  |
| p38c-4 | p38c | CG6459      | 37006   | 20130085  | 51  |
| p38c-1 | p38c | Ge-1        | 34541   | 24583631  | 58  |
| p38c-1 | p38c | CG17454     | 7354399 | 221513728 | 52  |
| p38c-2 | p38c | CG17454     | 7354399 | 221513728 | 66  |
| p38c-1 | p38c | CSN3        | 40308   | 24667760  | 46  |
| p38c-2 | p38c | mbo         | 41562   | 24646365  | 85  |
| p38c-3 | p38c | mbo         | 41562   | 24646365  | 53  |
| p38c-4 | p38c | mbo         | 41562   | 24646365  | 58  |
| p38c-2 | p38c | CG5931      | 39737   | 28574898  | 78  |
| p38c-2 | p38c | CG4858      | 40282   | 24667611  | 72  |
| p38c-2 | p38c | Tpr2        | 34984   | 17648033  | 67  |
| p38c-2 | p38c | noi         | 40678   | 17137118  | 67  |
| p38c-2 | p38c | CG18428     | 42857   | 24649541  | 66  |
| p38c-2 | p38c | CG32528     | 32990   | 24643390  | 61  |
| p38c-2 | p38c | kuk         | 42063   | 24647601  | 59  |
| p38c-2 | p38c | Vinc        | 31201   | 17136646  | 53  |
| p38c-2 | p38c | CG10420     | 43034   | 21356289  | 52  |
| p38c-2 | p38c | (2)09851    | 46662   | 28573273  | 51  |
| p38c-2 | p38c | CG16833     | 47729   | 281364830 | 50  |
| p38c-2 | p38c | ird1        | 41096   | 24645278  | 50  |
| p38c-2 | p38c | CG9588      | 41672   | 21358025  | 47  |
| p38c-2 | p38c | CG14955     | 38371   | 24656439  | 46  |
| p38c-2 | p38c | Upf2        | 31724   | 24640488  | 45  |
| p38c-2 | p38c | Rrp45       | 32665   | 24642649  | 45  |
| p38c-3 | p38c | Hsc70-2     | 41609   | 17737941  | 179 |
| p38c-3 | p38c | betaTub97EF | 43359   | 24650776  | 164 |
| p38c-4 | p38c | betaTub97EF | 43359   | 24650776  | 200 |
| p38c-3 | p38c | eIF5B       | 44261   | 24656849  | 73  |
| p38c-3 | p38c | lva         | 31350   | 17933552  | 72  |
| p38c-3 | p38c | TepIV       | 35248   | 24585282  | 70  |
| p38c-3 | p38c | Arf72A      | 39745   | 24664933  | 68  |
| p38c-3 | p38c | CG11964     | 41068   | 21355603  | 66  |
| p38c-3 | p38c | CG42533     | 34030   | 281364556 | 59  |
| p38c-3 | p38c | unk         | 42738   | 28572104  | 53  |
| p38c-3 | p38c | p16-ARC     | 33444   | 19920586  | 53  |
| p38c-3 | p38c | CG12259     | 43347   | 21357729  | 53  |
| p38c-3 | p38c | NHP2        | 44005   | 21356151  | 49  |
| p38c-3 | p38c | CG6607      | 42925   | 24649695  | 48  |
| p38c-3 | p38c | alien       | 34225   | 17647149  | 46  |
| p38c-3 | p38c | CG17333     | 32013   | 24641119  | 46  |
| p38c-3 | p38c | Cp190       | 41848   | 24647062  | 45  |
| p38c-3 | p38c | Cpsf73      | 42240   | 24648013  | 45  |
| p38c-4 | p38c | CG5899      | 34311   | 24583161  | 98  |
| p38c-4 | p38c | Aos1        | 41532   | 21357111  | 88  |

|        |      |              |        |          |    |
|--------|------|--------------|--------|----------|----|
| p38c-4 | p38c | CG18528      | 42906  | 45550813 | 87 |
| p38c-4 | p38c | CG5703       | 32740  | 18859877 | 72 |
| p38c-4 | p38c | Pp1alpha-96A | 42922  | 17738177 | 65 |
| p38c-4 | p38c | snf          | 31442  | 17737284 | 58 |
| p38c-4 | p38c | Srp19        | 38815  | 24659997 | 57 |
| p38c-4 | p38c | RPA2         | 35364  | 19921606 | 54 |
| p38c-4 | p38c | dgt4         | 31361  | 20128985 | 53 |
| p38c-4 | p38c | CG10703      | 41350  | 24645887 | 52 |
| p38c-4 | p38c | His1:CG31617 | 318854 | 24585669 | 52 |
| p38c-4 | p38c | eIF2B-delta  | 37706  | 19922816 | 51 |
| p38c-4 | p38c | CG11943      | 33002  | 24643409 | 51 |
| p38c-4 | p38c | epsilonTry   | 49080  | 17933738 | 48 |
| p38c-4 | p38c | CG12301      | 39689  | 21357943 | 47 |
| p38c-4 | p38c | mRpS10       | 41838  | 24647027 | 46 |
| p38c-4 | p38c | CG4199       | 31174  | 18543267 | 45 |

abeled as follows: US, unstimulated;  
: was generated by analyzing RAW datafiles

| Peptide Number | Unique Peptide Number | Coverage |
|----------------|-----------------------|----------|
| 40             | 19                    | 14.2     |
| 31             | 18                    | 14.3     |
| 20             | 13                    | 10.6     |
| 14             | 9                     | 7.7      |
| 22             | 13                    | 10.6     |
| 25             | 17                    | 12.4     |
| 2              | 1                     | 0.9      |
| 12             | 6                     | 5.6      |
| 4              | 3                     | 2.3      |
| 16             | 10                    | 9.1      |
| 16             | 9                     | 8.3      |
| 7              | 6                     | 4.9      |
| 16             | 11                    | 10       |
| 2              | 1                     | 1.6      |
| 9              | 3                     | 3        |
| 7              | 5                     | 5        |
| 8              | 5                     | 4.5      |
| 13             | 8                     | 6.6      |
| 15             | 9                     | 9.3      |
| 20             | 11                    | 9.8      |
| 24             | 14                    | 11.2     |
| 51             | 21                    | 33.2     |
| 41             | 20                    | 30.4     |
| 56             | 24                    | 41.4     |
| 40             | 17                    | 30.8     |
| 42             | 17                    | 25       |
| 39             | 17                    | 30       |
| 12             | 3                     | 6.4      |
| 12             | 4                     | 7.1      |
| 20             | 11                    | 16.5     |
| 16             | 10                    | 16       |
| 29             | 14                    | 24.3     |
| 42             | 20                    | 30.4     |
| 55             | 23                    | 34.9     |
| 48             | 18                    | 30.4     |
| 27             | 14                    | 24.4     |
| 20             | 11                    | 20.5     |
| 20             | 11                    | 19       |
| 23             | 12                    | 21.2     |
| 49             | 20                    | 29.4     |
| 50             | 23                    | 37.9     |



|     |    |      |
|-----|----|------|
| 56  | 25 | 34.6 |
| 56  | 26 | 36.8 |
| 174 | 21 | 50.5 |
| 88  | 17 | 39.4 |
| 135 | 20 | 41.8 |
| 125 | 16 | 38.1 |
| 277 | 22 | 54   |
| 151 | 25 | 54.5 |
| 27  | 4  | 15.7 |
| 9   | 5  | 20.1 |
| 81  | 14 | 34   |
| 59  | 18 | 42.9 |
| 42  | 10 | 31.1 |
| 77  | 12 | 31.8 |
| 106 | 18 | 43.6 |
| 137 | 17 | 41.2 |
| 1   | 1  | 1.7  |
| 157 | 20 | 42.3 |
| 194 | 18 | 53.2 |
| 123 | 20 | 46.8 |
| 117 | 21 | 46.6 |
| 43  | 16 | 34.1 |
| 31  | 11 | 32.1 |
| 42  | 18 | 33.8 |
| 35  | 13 | 28.1 |
| 52  | 13 | 33.3 |
| 50  | 16 | 36.9 |
| 17  | 3  | 7.2  |
| 9   | 4  | 9.7  |
| 54  | 13 | 30.6 |
| 71  | 20 | 37.3 |
| 33  | 14 | 29   |
| 46  | 20 | 38.9 |
| 43  | 17 | 35.2 |
| 42  | 16 | 32   |
| 20  | 10 | 21.2 |
| 17  | 11 | 25.3 |
| 31  | 17 | 30.1 |
| 25  | 12 | 24.9 |
| 48  | 22 | 40.2 |
| 42  | 18 | 34.3 |
| 37  | 15 | 28.4 |
| 38  | 17 | 31.8 |
| 36  | 17 | 19.5 |
| 24  | 14 | 17.2 |
| 34  | 15 | 16.3 |
| 25  | 15 | 16.2 |

|    |    |      |
|----|----|------|
| 11 | 6  | 6.5  |
| 28 | 13 | 14   |
| 3  | 2  | 1.2  |
| 5  | 3  | 4    |
| 6  | 3  | 3.9  |
| 19 | 11 | 13.3 |
| 23 | 12 | 14.1 |
| 17 | 10 | 12.3 |
| 10 | 6  | 7.7  |
| 11 | 7  | 9.7  |
| 10 | 7  | 8.4  |
| 7  | 3  | 3.9  |
| 15 | 8  | 9    |
| 22 | 12 | 36.6 |
| 34 | 17 | 45   |
| 20 | 10 | 25.5 |
| 28 | 14 | 35.6 |
| 2  | 2  | 4.4  |
| 8  | 4  | 9.1  |
| 3  | 2  | 4.5  |
| 3  | 2  | 4.5  |
| 18 | 9  | 24.6 |
| 3  | 2  | 4.7  |
| 21 | 11 | 32.8 |
| 25 | 13 | 38.2 |
| 25 | 12 | 34.7 |
| 18 | 10 | 30.2 |
| 19 | 10 | 27.6 |
| 14 | 8  | 24.8 |
| 14 | 8  | 29   |
| 16 | 7  | 24.3 |
| 26 | 12 | 37.7 |
| 29 | 14 | 44.9 |
| 26 | 13 | 38   |
| 34 | 16 | 44.3 |
| 25 | 15 | 11.1 |
| 26 | 16 | 9.9  |
| 33 | 20 | 12.5 |
| 37 | 20 | 12.6 |
| 10 | 7  | 5.2  |
| 13 | 10 | 6.9  |
| 2  | 2  | 1.1  |
| 3  | 2  | 1.7  |
| 3  | 2  | 1.4  |
| 1  | 1  | 0.5  |
| 9  | 6  | 4.4  |
| 13 | 6  | 4.9  |

|    |    |      |
|----|----|------|
| 21 | 15 | 10.1 |
| 28 | 16 | 12.2 |
| 2  | 1  | 1.3  |
| 6  | 4  | 2.6  |
| 10 | 6  | 5.2  |
| 8  | 4  | 3.4  |
| 25 | 15 | 11   |
| 30 | 17 | 13.4 |
| 28 | 16 | 10.7 |
| 25 | 13 | 8.9  |
| 25 | 11 | 7.7  |
| 4  | 2  | 19.7 |
| 9  | 5  | 37.7 |
| 5  | 3  | 26.2 |
| 4  | 2  | 19.7 |
| 1  | 1  | 6.6  |
| 5  | 3  | 25.1 |
| 2  | 1  | 8.7  |
| 3  | 2  | 28.4 |
| 9  | 5  | 47   |
| 6  | 3  | 32.2 |
| 7  | 5  | 39.9 |
| 3  | 2  | 16.9 |
| 18 | 12 | 8.7  |
| 13 | 9  | 6.1  |
| 12 | 7  | 5.4  |
| 3  | 3  | 2    |
| 1  | 1  | 0.8  |
| 3  | 3  | 2.4  |
| 9  | 6  | 4.1  |
| 14 | 9  | 5.7  |
| 3  | 2  | 1.5  |
| 1  | 1  | 0.8  |
| 5  | 4  | 2.9  |
| 2  | 1  | 0.7  |
| 4  | 2  | 1.4  |
| 10 | 6  | 4.3  |
| 20 | 10 | 8    |
| 32 | 18 | 14.5 |
| 47 | 24 | 20.6 |
| 33 | 17 | 14.2 |
| 20 | 11 | 8.3  |
| 41 | 21 | 15   |
| 9  | 4  | 3.7  |
| 5  | 3  | 2.5  |
| 5  | 4  | 3.5  |
| 1  | 1  | 0.9  |

|    |    |      |
|----|----|------|
| 17 | 9  | 8.8  |
| 35 | 19 | 14.2 |
| 19 | 12 | 9.1  |
| 10 | 7  | 5.7  |
| 16 | 11 | 9    |
| 21 | 11 | 9.9  |
| 10 | 6  | 4.9  |
| 18 | 9  | 7.7  |
| 25 | 10 | 28.5 |
| 36 | 17 | 31.4 |
| 29 | 12 | 28.8 |
| 29 | 11 | 23.9 |
| 52 | 19 | 36.9 |
| 65 | 25 | 43.4 |
| 8  | 4  | 8.2  |
| 9  | 2  | 6.7  |
| 44 | 16 | 30.6 |
| 41 | 15 | 36.1 |
| 21 | 8  | 22.7 |
| 26 | 12 | 30.2 |
| 22 | 8  | 23   |
| 32 | 11 | 25.2 |
| 9  | 5  | 11.3 |
| 9  | 3  | 11.4 |
| 8  | 3  | 10.8 |
| 40 | 15 | 40.5 |
| 32 | 13 | 34.5 |
| 25 | 11 | 27.7 |
| 39 | 16 | 40.4 |
| 23 | 10 | 20.1 |
| 28 | 13 | 24.1 |
| 28 | 14 | 26.5 |
| 29 | 15 | 26.5 |
| 17 | 9  | 18.4 |
| 26 | 11 | 20.3 |
| 10 | 4  | 6.9  |
| 6  | 4  | 7.7  |
| 14 | 7  | 15.9 |
| 7  | 4  | 5.4  |
| 17 | 9  | 16.9 |
| 26 | 12 | 23   |
| 24 | 11 | 20.5 |
| 22 | 10 | 19.9 |
| 5  | 3  | 6    |
| 13 | 6  | 13.1 |
| 13 | 6  | 13.6 |
| 12 | 7  | 15.2 |

|    |    |      |
|----|----|------|
| 24 | 13 | 23.6 |
| 32 | 15 | 27.1 |
| 24 | 11 | 22.5 |
| 29 | 11 | 21.3 |
| 11 | 7  | 11   |
| 6  | 4  | 6.6  |
| 7  | 5  | 7.3  |
| 9  | 5  | 7.9  |
| 8  | 6  | 9.7  |
| 4  | 2  | 3.4  |
| 2  | 2  | 3.4  |
| 2  | 1  | 1.2  |
| 2  | 2  | 2.9  |
| 9  | 5  | 8.2  |
| 1  | 1  | 1.7  |
| 1  | 1  | 1.7  |
| 11 | 7  | 10.7 |
| 9  | 6  | 9.2  |
| 7  | 5  | 7.5  |
| 19 | 9  | 12.8 |
| 26 | 11 | 15.7 |
| 21 | 10 | 13.8 |
| 26 | 11 | 15.6 |
| 41 | 17 | 24.3 |
| 23 | 10 | 13.2 |
| 12 | 7  | 10.4 |
| 5  | 2  | 2.2  |
| 10 | 5  | 5.9  |
| 4  | 2  | 3.2  |
| 14 | 8  | 11.8 |
| 16 | 7  | 10.1 |
| 14 | 8  | 11.2 |
| 20 | 11 | 16.6 |
| 13 | 7  | 8.7  |
| 10 | 8  | 10.2 |
| 14 | 8  | 8.8  |
| 30 | 12 | 12.5 |
| 18 | 7  | 21.6 |
| 19 | 9  | 27.6 |
| 25 | 12 | 40   |
| 16 | 8  | 25.1 |
| 7  | 4  | 10.6 |
| 12 | 7  | 17.1 |
| 2  | 2  | 5.7  |
| 3  | 2  | 7.6  |
| 6  | 3  | 10.6 |
| 8  | 4  | 14.1 |

|    |    |      |
|----|----|------|
| 18 | 9  | 26.1 |
| 15 | 8  | 23.5 |
| 9  | 3  | 9.8  |
| 1  | 1  | 2    |
| 11 | 7  | 23.9 |
| 13 | 5  | 18.6 |
| 11 | 6  | 21.6 |
| 21 | 8  | 26.1 |
| 12 | 7  | 27.1 |
| 11 | 6  | 20.7 |
| 14 | 8  | 25.3 |
| 18 | 8  | 25.6 |
| 17 | 5  | 17.1 |
| 14 | 7  | 22.2 |
| 7  | 2  | 7.8  |
| 5  | 3  | 12.2 |
| 10 | 4  | 13.8 |
| 7  | 4  | 10.2 |
| 9  | 4  | 14.9 |
| 11 | 7  | 23.6 |
| 16 | 8  | 25.6 |
| 11 | 6  | 20.7 |
| 5  | 3  | 11.8 |
| 10 | 6  | 21.8 |
| 15 | 6  | 23.6 |
| 9  | 5  | 18.9 |
| 11 | 8  | 24.4 |
| 13 | 6  | 21.6 |
| 16 | 7  | 22.7 |
| 15 | 7  | 21.1 |
| 14 | 7  | 18.2 |
| 23 | 10 | 26.6 |
| 24 | 12 | 24.9 |
| 18 | 8  | 19.3 |
| 21 | 11 | 22.6 |
| 8  | 5  | 9.1  |
| 9  | 7  | 16.3 |
| 8  | 4  | 9.1  |
| 13 | 5  | 12.5 |
| 11 | 6  | 13.3 |
| 5  | 3  | 9    |
| 6  | 4  | 10.3 |
| 4  | 2  | 4.5  |
| 5  | 4  | 10.2 |
| 3  | 2  | 4.5  |
| 9  | 5  | 10.7 |
| 12 | 6  | 15.9 |

|    |    |      |
|----|----|------|
| 5  | 2  | 6.5  |
| 16 | 7  | 17.2 |
| 13 | 5  | 20.8 |
| 12 | 5  | 18.4 |
| 13 | 6  | 20.8 |
| 8  | 5  | 18.4 |
| 6  | 3  | 10.5 |
| 11 | 4  | 12.9 |
| 4  | 2  | 6    |
| 3  | 2  | 9.2  |
| 4  | 2  | 6.2  |
| 1  | 1  | 3.6  |
| 6  | 4  | 15.2 |
| 6  | 3  | 10.5 |
| 11 | 5  | 18.4 |
| 12 | 5  | 18.4 |
| 4  | 3  | 12.2 |
| 7  | 4  | 14.6 |
| 17 | 6  | 20.8 |
| 8  | 4  | 16.5 |
| 10 | 5  | 20.8 |
| 16 | 6  | 23.3 |
| 10 | 4  | 17.6 |
| 8  | 4  | 12.9 |
| 17 | 6  | 14.3 |
| 20 | 7  | 22.5 |
| 17 | 7  | 22.5 |
| 21 | 5  | 17.7 |
| 70 | 9  | 23.5 |
| 58 | 10 | 26.9 |
| 16 | 5  | 15.7 |
| 31 | 4  | 15.5 |
| 15 | 6  | 19.9 |
| 10 | 7  | 19.9 |
| 9  | 3  | 12.6 |
| 17 | 6  | 20.3 |
| 13 | 5  | 17.7 |
| 28 | 6  | 19.9 |
| 24 | 6  | 17.9 |
| 16 | 6  | 17.9 |
| 21 | 8  | 22   |
| 21 | 7  | 20.6 |
| 11 | 6  | 8.1  |
| 12 | 8  | 10.6 |
| 27 | 16 | 26.2 |
| 5  | 3  | 4.3  |
| 12 | 7  | 9.3  |

|    |    |      |
|----|----|------|
| 15 | 9  | 12.1 |
| 1  | 1  | 3.4  |
| 5  | 4  | 5.8  |
| 4  | 3  | 3.8  |
| 1  | 1  | 3.4  |
| 5  | 3  | 5.2  |
| 9  | 6  | 8.3  |
| 11 | 7  | 10.3 |
| 1  | 1  | 3.4  |
| 2  | 1  | 3.4  |
| 7  | 4  | 8.9  |
| 10 | 7  | 14.5 |
| 12 | 6  | 11.7 |
| 6  | 4  | 8.8  |
| 8  | 5  | 22.6 |
| 1  | 1  | 7.8  |
| 2  | 1  | 7.8  |
| 2  | 1  | 7.8  |
| 4  | 2  | 12.5 |
| 4  | 3  | 17.4 |
| 11 | 7  | 18.2 |
| 18 | 9  | 24.4 |
| 18 | 10 | 23.2 |
| 14 | 7  | 22.1 |
| 5  | 4  | 11.4 |
| 14 | 7  | 17.8 |
| 5  | 3  | 9    |
| 4  | 3  | 7.5  |
| 4  | 3  | 13.4 |
| 16 | 9  | 26.5 |
| 14 | 8  | 19.9 |
| 10 | 7  | 22.1 |
| 4  | 2  | 10.8 |
| 6  | 3  | 8.8  |
| 7  | 4  | 10.5 |
| 11 | 6  | 14.2 |
| 14 | 8  | 20.2 |
| 14 | 8  | 21.1 |
| 13 | 7  | 18   |
| 11 | 6  | 13.2 |
| 14 | 6  | 18.2 |
| 17 | 9  | 24.4 |
| 23 | 12 | 30.5 |
| 19 | 10 | 25.6 |
| 14 | 9  | 23.9 |
| 18 | 11 | 26.7 |
| 2  | 1  | 4    |



|    |    |      |
|----|----|------|
| 4  | 2  | 7.2  |
| 8  | 5  | 14.7 |
| 7  | 4  | 11.4 |
| 9  | 5  | 14.5 |
| 14 | 8  | 20.2 |
| 22 | 11 | 29.2 |
| 17 | 9  | 23.2 |
| 12 | 6  | 18.2 |
| 10 | 7  | 17.8 |
| 13 | 8  | 25.7 |
| 21 | 10 | 26.7 |
| 20 | 10 | 25.7 |
| 19 | 10 | 26.7 |
| 21 | 11 | 27.9 |
| 19 | 11 | 27.9 |
| 18 | 9  | 26.9 |
| 6  | 3  | 7.1  |
| 10 | 5  | 13.1 |
| 10 | 6  | 15.7 |
| 11 | 8  | 22   |
| 23 | 14 | 34.7 |
| 2  | 1  | 5.1  |
| 3  | 2  | 5.3  |
| 9  | 5  | 11.8 |
| 4  | 2  | 5.1  |
| 6  | 4  | 13.9 |
| 6  | 4  | 9.4  |
| 11 | 6  | 18.4 |
| 3  | 2  | 8    |
| 6  | 4  | 10   |
| 3  | 3  | 10   |
| 12 | 6  | 18.4 |
| 17 | 10 | 26.9 |
| 8  | 4  | 13.3 |
| 9  | 5  | 14.9 |
| 12 | 6  | 17.6 |
| 23 | 12 | 31.9 |
| 15 | 8  | 22.9 |
| 17 | 8  | 22.9 |
| 15 | 8  | 21   |
| 19 | 10 | 23.3 |
| 7  | 3  | 11.6 |
| 6  | 2  | 10.3 |
| 6  | 2  | 7.7  |
| 4  | 2  | 4.7  |
| 6  | 5  | 14.8 |
| 16 | 8  | 22.9 |

|    |    |      |
|----|----|------|
| 11 | 7  | 18   |
| 12 | 6  | 15.6 |
| 6  | 4  | 15.4 |
| 4  | 2  | 7.7  |
| 7  | 4  | 13.7 |
| 11 | 5  | 15.9 |
| 18 | 8  | 21.2 |
| 17 | 7  | 18.8 |
| 9  | 5  | 12.4 |
| 15 | 7  | 19.3 |
| 10 | 7  | 15.2 |
| 19 | 8  | 14.5 |
| 14 | 6  | 11.8 |
| 14 | 7  | 15   |
| 4  | 1  | 3.6  |
| 18 | 9  | 15.9 |
| 2  | 1  | 1.8  |
| 4  | 2  | 3.4  |
| 9  | 3  | 5.5  |
| 11 | 6  | 13.6 |
| 11 | 5  | 11.8 |
| 5  | 2  | 5.6  |
| 6  | 2  | 5.3  |
| 4  | 2  | 5.2  |
| 2  | 1  | 1.8  |
| 3  | 2  | 4.7  |
| 14 | 8  | 17.7 |
| 17 | 9  | 18.6 |
| 10 | 4  | 9.5  |
| 26 | 12 | 22.5 |
| 9  | 7  | 25.6 |
| 2  | 1  | 2.8  |
| 3  | 2  | 5.4  |
| 9  | 5  | 16.7 |
| 16 | 10 | 29   |
| 3  | 2  | 5.4  |
| 1  | 1  | 2.6  |
| 1  | 1  | 2.6  |
| 2  | 2  | 5.4  |
| 4  | 3  | 10.5 |
| 2  | 1  | 2.6  |
| 2  | 2  | 5.4  |
| 3  | 2  | 8.7  |
| 4  | 3  | 9.1  |
| 7  | 4  | 11.7 |
| 19 | 7  | 22.9 |
| 14 | 5  | 18.4 |

|    |    |      |
|----|----|------|
| 18 | 5  | 18.4 |
| 23 | 8  | 25.5 |
| 24 | 7  | 22.9 |
| 9  | 4  | 13.6 |
| 2  | 2  | 9.1  |
| 7  | 2  | 9.1  |
| 12 | 6  | 21.2 |
| 11 | 5  | 16.2 |
| 14 | 6  | 21.4 |
| 23 | 7  | 22.9 |
| 24 | 9  | 27.4 |
| 16 | 6  | 20.7 |
| 15 | 7  | 24.2 |
| 13 | 5  | 18.1 |
| 10 | 6  | 17.9 |
| 15 | 6  | 22.5 |
| 18 | 5  | 18.6 |
| 18 | 6  | 20.5 |
| 15 | 6  | 20.3 |
| 16 | 6  | 21.2 |
| 13 | 6  | 18.6 |
| 12 | 7  | 22.1 |
| 11 | 7  | 21.3 |
| 13 | 7  | 21.9 |
| 9  | 4  | 11.3 |
| 14 | 7  | 17.3 |
| 4  | 3  | 8.7  |
| 6  | 4  | 14.8 |
| 3  | 2  | 5.7  |
| 3  | 2  | 6.6  |
| 10 | 5  | 11.6 |
| 15 | 10 | 27.5 |
| 10 | 5  | 14.3 |
| 5  | 3  | 10   |
| 4  | 2  | 6.3  |
| 7  | 4  | 10.9 |
| 7  | 5  | 11.4 |
| 8  | 4  | 12.4 |
| 14 | 7  | 21.6 |
| 9  | 4  | 11.4 |
| 9  | 5  | 14.8 |
| 12 | 6  | 20.6 |
| 16 | 6  | 19.2 |
| 13 | 5  | 16.6 |
| 15 | 6  | 19.2 |
| 17 | 5  | 15.2 |
| 18 | 6  | 19.7 |

|    |   |      |
|----|---|------|
| 12 | 4 | 14.3 |
| 5  | 3 | 10.5 |
| 8  | 5 | 16.6 |
| 8  | 4 | 12.5 |
| 14 | 6 | 19.2 |
| 10 | 7 | 19.9 |
| 10 | 7 | 23   |
| 18 | 6 | 20.4 |
| 10 | 6 | 22.6 |
| 10 | 4 | 15.9 |
| 11 | 6 | 20.4 |
| 9  | 4 | 13.9 |
| 13 | 5 | 16.6 |
| 13 | 6 | 19.2 |
| 15 | 8 | 25.7 |
| 10 | 6 | 18.3 |
| 8  | 5 | 10.2 |
| 9  | 5 | 8.3  |
| 6  | 3 | 6.1  |
| 6  | 3 | 6    |
| 10 | 8 | 11.9 |
| 2  | 2 | 3.6  |
| 3  | 2 | 3.4  |
| 5  | 3 | 5.1  |
| 2  | 1 | 2    |
| 3  | 1 | 2    |
| 7  | 3 | 4.7  |
| 1  | 1 | 2    |
| 8  | 4 | 8.7  |
| 12 | 5 | 7.4  |
| 4  | 2 | 3.4  |
| 6  | 4 | 7.3  |
| 11 | 6 | 31.8 |
| 12 | 5 | 23   |
| 8  | 4 | 18.4 |
| 14 | 7 | 34.1 |
| 15 | 6 | 33   |
| 16 | 8 | 41.4 |
| 12 | 3 | 16.1 |
| 6  | 3 | 16.1 |
| 5  | 4 | 19.5 |
| 2  | 1 | 4.2  |
| 10 | 4 | 19.2 |
| 13 | 7 | 34.1 |
| 7  | 4 | 19.2 |
| 8  | 4 | 18.8 |
| 7  | 4 | 19.5 |

|    |   |      |
|----|---|------|
| 5  | 3 | 14.2 |
| 7  | 5 | 26.4 |
| 15 | 6 | 33   |
| 13 | 7 | 37.9 |
| 17 | 8 | 41.4 |
| 11 | 6 | 32.6 |
| 12 | 5 | 29.1 |
| 11 | 5 | 12.5 |
| 3  | 2 | 5.7  |
| 9  | 5 | 13.2 |
| 8  | 4 | 9.1  |
| 6  | 4 | 10.1 |
| 3  | 3 | 7.8  |
| 3  | 2 | 4.9  |
| 3  | 2 | 4.2  |
| 7  | 4 | 10.6 |
| 2  | 1 | 2.4  |
| 1  | 1 | 2.9  |
| 2  | 1 | 2.9  |
| 8  | 4 | 10.6 |
| 9  | 3 | 8.1  |
| 8  | 3 | 7.8  |
| 10 | 4 | 10.6 |
| 15 | 7 | 22.7 |
| 13 | 9 | 23.4 |
| 12 | 7 | 21.4 |
| 15 | 9 | 23.1 |
| 8  | 4 | 13.4 |
| 11 | 7 | 17.2 |
| 7  | 4 | 13.4 |
| 5  | 3 | 7.3  |
| 12 | 7 | 17.9 |
| 15 | 9 | 20.3 |
| 14 | 6 | 17.4 |
| 6  | 5 | 14.5 |
| 4  | 3 | 8.4  |
| 9  | 3 | 10.6 |
| 11 | 5 | 14.7 |
| 10 | 5 | 15.2 |
| 9  | 5 | 15.2 |
| 14 | 7 | 21.4 |
| 16 | 9 | 23.8 |
| 10 | 5 | 17.4 |
| 13 | 7 | 24.3 |
| 11 | 5 | 17.4 |
| 15 | 8 | 22.8 |
| 13 | 4 | 12.7 |

|    |    |      |
|----|----|------|
| 15 | 6  | 16.1 |
| 6  | 2  | 7.5  |
| 5  | 2  | 7.5  |
| 7  | 3  | 10.5 |
| 8  | 3  | 9.7  |
| 12 | 6  | 19.8 |
| 15 | 7  | 20.9 |
| 19 | 8  | 23.7 |
| 14 | 6  | 18.5 |
| 11 | 5  | 17.4 |
| 11 | 5  | 14.4 |
| 13 | 6  | 19.7 |
| 15 | 8  | 24.6 |
| 19 | 8  | 25   |
| 16 | 8  | 24.6 |
| 16 | 10 | 28.3 |
| 11 | 5  | 14.4 |
| 13 | 7  | 18   |
| 10 | 5  | 16   |
| 10 | 6  | 15.7 |
| 6  | 3  | 8    |
| 4  | 3  | 8.6  |
| 17 | 11 | 30.9 |
| 2  | 2  | 7.2  |
| 2  | 1  | 2.9  |
| 3  | 2  | 5.9  |
| 4  | 3  | 7.8  |
| 9  | 6  | 18   |
| 5  | 4  | 10.6 |
| 3  | 2  | 5.7  |
| 4  | 3  | 10.6 |
| 5  | 3  | 10   |
| 7  | 4  | 10.6 |
| 6  | 3  | 8.6  |
| 5  | 3  | 9.4  |
| 2  | 2  | 5.5  |
| 8  | 5  | 14.9 |
| 7  | 4  | 25   |
| 9  | 5  | 28.1 |
| 14 | 6  | 34   |
| 8  | 5  | 24.2 |
| 10 | 5  | 28.1 |
| 18 | 8  | 42.2 |
| 6  | 4  | 25   |
| 5  | 3  | 16.4 |
| 4  | 2  | 12.1 |
| 1  | 1  | 5.9  |

|    |   |      |
|----|---|------|
| 7  | 3 | 18.8 |
| 7  | 3 | 16.8 |
| 11 | 6 | 34   |
| 11 | 6 | 34   |
| 3  | 2 | 8.6  |
| 6  | 4 | 23.4 |
| 3  | 2 | 12.9 |
| 8  | 5 | 28.1 |
| 8  | 4 | 20.3 |
| 14 | 5 | 27   |
| 13 | 7 | 34.4 |
| 7  | 5 | 23.8 |
| 9  | 5 | 19.5 |
| 9  | 5 | 16.3 |
| 8  | 5 | 18.3 |
| 6  | 4 | 14.5 |
| 4  | 3 | 22.3 |
| 6  | 3 | 12.4 |
| 1  | 1 | 2.7  |
| 7  | 3 | 12.2 |
| 2  | 1 | 4    |
| 6  | 4 | 15   |
| 4  | 3 | 12.2 |
| 4  | 2 | 10.1 |
| 8  | 3 | 12.2 |
| 6  | 2 | 10.1 |
| 4  | 2 | 10.1 |
| 3  | 2 | 10.1 |
| 5  | 2 | 10.1 |
| 6  | 4 | 16.2 |
| 9  | 5 | 18.9 |
| 10 | 6 | 19.7 |
| 8  | 4 | 13.8 |
| 10 | 6 | 8.9  |
| 10 | 6 | 9.1  |
| 6  | 4 | 4.8  |
| 8  | 5 | 7.2  |
| 10 | 4 | 4.8  |
| 11 | 6 | 6.6  |
| 4  | 2 | 3    |
| 5  | 3 | 3.9  |
| 5  | 3 | 3.9  |
| 5  | 3 | 4.7  |
| 6  | 4 | 5.5  |
| 2  | 1 | 1.2  |
| 4  | 2 | 3    |
| 2  | 1 | 1.7  |

|    |   |      |
|----|---|------|
| 2  | 1 | 1.7  |
| 6  | 3 | 3.9  |
| 8  | 4 | 5.6  |
| 5  | 3 | 4.4  |
| 9  | 6 | 8.4  |
| 8  | 5 | 13   |
| 4  | 2 | 4.1  |
| 3  | 2 | 2.2  |
| 2  | 1 | 1.9  |
| 8  | 3 | 9.1  |
| 14 | 6 | 18.4 |
| 1  | 1 | 1.9  |
| 6  | 3 | 6.2  |
| 2  | 1 | 1.9  |
| 2  | 1 | 1.9  |
| 4  | 2 | 4.1  |
| 2  | 1 | 1.9  |
| 3  | 2 | 7.2  |
| 3  | 2 | 7.2  |
| 6  | 3 | 9.5  |
| 6  | 3 | 9.5  |
| 9  | 5 | 30.5 |
| 5  | 3 | 14.9 |
| 5  | 2 | 13.7 |
| 4  | 2 | 20.6 |
| 2  | 1 | 7.3  |
| 4  | 1 | 11.1 |
| 6  | 2 | 11.1 |
| 2  | 1 | 7.3  |
| 8  | 5 | 22.1 |
| 22 | 9 | 36.3 |
| 1  | 1 | 9.5  |
| 3  | 2 | 10.3 |
| 4  | 2 | 10.3 |
| 5  | 3 | 13.7 |
| 1  | 1 | 7.3  |
| 3  | 1 | 7.3  |
| 2  | 1 | 7.3  |
| 2  | 1 | 7.3  |
| 4  | 1 | 7.3  |
| 4  | 2 | 16.8 |
| 2  | 1 | 7.3  |
| 11 | 6 | 15.2 |
| 5  | 3 | 7.1  |
| 4  | 3 | 8.5  |
| 5  | 3 | 7.1  |
| 7  | 4 | 10.6 |



|    |    |      |
|----|----|------|
| 2  | 1  | 2.8  |
| 1  | 1  | 2.8  |
| 2  | 1  | 1.4  |
| 1  | 1  | 1.4  |
| 6  | 3  | 9.2  |
| 5  | 3  | 9.2  |
| 2  | 1  | 3.5  |
| 7  | 4  | 11.3 |
| 7  | 6  | 15.9 |
| 2  | 1  | 2.6  |
| 3  | 2  | 6.1  |
| 2  | 1  | 3.5  |
| 1  | 1  | 2.6  |
| 1  | 1  | 2.6  |
| 2  | 2  | 5.2  |
| 2  | 1  | 2.2  |
| 1  | 1  | 3.5  |
| 1  | 1  | 3.5  |
| 11 | 6  | 11.8 |
| 14 | 7  | 10.8 |
| 8  | 4  | 6.8  |
| 11 | 6  | 10.9 |
| 20 | 10 | 15.9 |
| 18 | 8  | 12   |
| 4  | 3  | 5.1  |
| 14 | 7  | 11.4 |
| 7  | 3  | 5.1  |
| 11 | 6  | 10.6 |
| 11 | 7  | 11.8 |
| 14 | 6  | 9.6  |
| 4  | 2  | 3.6  |
| 12 | 6  | 11.8 |
| 10 | 5  | 7.9  |
| 13 | 7  | 10   |
| 18 | 9  | 12.3 |
| 6  | 4  | 5.2  |
| 7  | 4  | 7    |
| 10 | 4  | 5.1  |
| 8  | 4  | 7    |
| 12 | 6  | 8.9  |
| 11 | 6  | 8.4  |
| 5  | 2  | 3    |
| 4  | 3  | 4.3  |
| 1  | 1  | 1.2  |
| 8  | 5  | 6.9  |
| 11 | 6  | 9    |
| 3  | 2  | 3    |

|    |   |      |
|----|---|------|
| 13 | 5 | 6.8  |
| 8  | 3 | 14.3 |
| 21 | 5 | 24.1 |
| 22 | 7 | 35.6 |
| 7  | 3 | 15.5 |
| 18 | 5 | 26.8 |
| 67 | 7 | 35.6 |
| 39 | 2 | 12.3 |
| 8  | 1 | 5.8  |
| 12 | 4 | 20.1 |
| 27 | 4 | 19   |
| 10 | 3 | 19   |
| 12 | 4 | 20.1 |
| 13 | 4 | 20.1 |
| 10 | 2 | 9    |
| 6  | 2 | 9    |
| 2  | 1 | 5.8  |
| 4  | 2 | 12.3 |
| 6  | 1 | 5.8  |
| 34 | 5 | 24.1 |
| 31 | 4 | 20.1 |
| 25 | 4 | 19.5 |
| 24 | 5 | 24.1 |
| 7  | 5 | 20.2 |
| 14 | 7 | 25.4 |
| 8  | 6 | 19.8 |
| 10 | 7 | 25.4 |
| 2  | 1 | 3.5  |
| 13 | 7 | 27.7 |
| 4  | 3 | 11.6 |
| 2  | 1 | 4    |
| 6  | 5 | 18.5 |
| 6  | 3 | 12.6 |
| 6  | 5 | 18.3 |
| 8  | 3 | 15.3 |
| 2  | 1 | 4    |
| 4  | 2 | 10.1 |
| 2  | 1 | 4    |
| 4  | 2 | 9.4  |
| 11 | 6 | 24.7 |
| 12 | 6 | 22.7 |
| 17 | 8 | 27.4 |
| 13 | 5 | 23.2 |
| 10 | 5 | 18.2 |
| 10 | 5 | 18.6 |
| 8  | 5 | 18.6 |
| 10 | 5 | 16.8 |

|    |   |      |
|----|---|------|
| 3  | 2 | 7.2  |
| 4  | 2 | 7.2  |
| 5  | 3 | 10.5 |
| 3  | 3 | 10.5 |
| 5  | 3 | 11   |
| 6  | 4 | 14   |
| 7  | 3 | 11.9 |
| 11 | 6 | 21   |
| 3  | 2 | 6.3  |
| 7  | 4 | 14.9 |
| 2  | 2 | 7.5  |
| 7  | 4 | 10.7 |
| 8  | 4 | 10.7 |
| 7  | 4 | 10.7 |
| 6  | 2 | 7.2  |
| 10 | 5 | 14.2 |
| 6  | 3 | 22.6 |
| 7  | 4 | 24.6 |
| 7  | 4 | 21   |
| 8  | 5 | 25.4 |
| 5  | 3 | 17.7 |
| 10 | 5 | 25.4 |
| 7  | 4 | 21.4 |
| 8  | 4 | 27.4 |
| 2  | 1 | 7.7  |
| 7  | 4 | 21.4 |
| 4  | 2 | 13.3 |
| 4  | 3 | 14.5 |
| 2  | 1 | 5.6  |
| 1  | 1 | 7.7  |
| 1  | 1 | 7.7  |
| 4  | 3 | 17.7 |
| 4  | 2 | 13.3 |
| 3  | 2 | 12.1 |
| 3  | 2 | 12.1 |
| 9  | 5 | 11   |
| 7  | 3 | 5.9  |
| 9  | 3 | 6.5  |
| 5  | 3 | 5.5  |
| 5  | 3 | 8.1  |
| 9  | 4 | 6.8  |
| 2  | 1 | 1.4  |
| 5  | 2 | 3.3  |
| 3  | 2 | 4.1  |
| 4  | 3 | 5.5  |
| 2  | 2 | 4.1  |
| 6  | 4 | 7.4  |

|    |   |      |
|----|---|------|
| 7  | 4 | 10   |
| 5  | 3 | 5.9  |
| 4  | 3 | 8.6  |
| 8  | 4 | 14.1 |
| 5  | 1 | 7.3  |
| 5  | 2 | 12.1 |
| 9  | 4 | 16.9 |
| 5  | 3 | 13.9 |
| 8  | 3 | 12.8 |
| 1  | 1 | 4.8  |
| 2  | 1 | 4.6  |
| 8  | 3 | 14.1 |
| 5  | 4 | 13.4 |
| 4  | 2 | 10   |
| 1  | 1 | 4.6  |
| 2  | 1 | 4.6  |
| 3  | 2 | 8.2  |
| 6  | 4 | 14.8 |
| 9  | 4 | 17.5 |
| 10 | 5 | 22.1 |
| 14 | 4 | 20   |
| 9  | 5 | 20.5 |
| 8  | 6 | 7.5  |
| 17 | 8 | 8.3  |
| 16 | 9 | 10.7 |
| 11 | 5 | 5.9  |
| 13 | 7 | 7.7  |
| 17 | 7 | 7.5  |
| 6  | 2 | 2.2  |
| 2  | 1 | 1.4  |
| 6  | 4 | 4.8  |
| 3  | 2 | 2.3  |
| 6  | 4 | 4.7  |
| 12 | 7 | 7.5  |
| 15 | 7 | 7.7  |
| 11 | 7 | 7.3  |
| 10 | 6 | 6.8  |
| 8  | 5 | 5.7  |
| 6  | 4 | 5.3  |
| 12 | 5 | 6.2  |
| 9  | 5 | 18.5 |
| 8  | 4 | 13.3 |
| 12 | 6 | 23.5 |
| 11 | 5 | 21.3 |
| 5  | 3 | 15.1 |
| 12 | 8 | 27.2 |
| 3  | 2 | 10.2 |

|    |   |      |
|----|---|------|
| 3  | 1 | 7.1  |
| 1  | 1 | 7.1  |
| 8  | 4 | 17.9 |
| 7  | 5 | 21   |
| 6  | 2 | 11.4 |
| 5  | 3 | 11.1 |
| 5  | 4 | 17.3 |
| 3  | 2 | 11.4 |
| 4  | 2 | 11.4 |
| 5  | 3 | 14.5 |
| 3  | 2 | 11.4 |
| 4  | 2 | 10.2 |
| 6  | 3 | 14.8 |
| 8  | 4 | 17.9 |
| 14 | 6 | 21   |
| 8  | 5 | 6.8  |
| 3  | 2 | 2.2  |
| 4  | 3 | 3.3  |
| 2  | 1 | 1.3  |
| 6  | 4 | 2.6  |
| 1  | 1 | 1.3  |
| 1  | 1 | 1.3  |
| 3  | 2 | 2    |
| 4  | 2 | 1.9  |
| 2  | 1 | 1    |
| 3  | 2 | 2.2  |
| 1  | 1 | 1.3  |
| 2  | 1 | 1.3  |
| 1  | 1 | 1.6  |
| 2  | 1 | 1.3  |
| 2  | 1 | 1.3  |
| 2  | 1 | 1.3  |
| 7  | 4 | 4.9  |
| 2  | 1 | 1.3  |
| 7  | 5 | 16.1 |
| 4  | 2 | 6.5  |
| 8  | 4 | 13.9 |
| 9  | 5 | 18.6 |
| 2  | 2 | 9.9  |
| 11 | 7 | 25.8 |
| 1  | 1 | 4.7  |
| 4  | 3 | 10.4 |
| 3  | 2 | 7.4  |
| 2  | 1 | 3.5  |
| 8  | 4 | 15.9 |
| 8  | 5 | 16.6 |
| 8  | 3 | 12.9 |

|    |   |      |
|----|---|------|
| 3  | 2 | 9.7  |
| 4  | 2 | 9.7  |
| 3  | 2 | 10.9 |
| 6  | 2 | 10.9 |
| 10 | 7 | 26.8 |
| 12 | 7 | 26.8 |
| 15 | 7 | 26.8 |
| 16 | 8 | 27.3 |
| 6  | 4 | 6.5  |
| 9  | 7 | 10.1 |
| 8  | 5 | 6.9  |
| 11 | 6 | 8.6  |
| 5  | 4 | 5.4  |
| 4  | 2 | 3    |
| 3  | 3 | 4.2  |
| 8  | 6 | 8.6  |
| 2  | 2 | 2.4  |
| 10 | 5 | 6    |
| 1  | 1 | 1.4  |
| 3  | 2 | 2.7  |
| 5  | 3 | 4.1  |
| 4  | 3 | 4.4  |
| 4  | 2 | 3    |
| 11 | 6 | 8.7  |
| 9  | 7 | 9.5  |
| 5  | 3 | 3.7  |
| 5  | 3 | 15.2 |
| 9  | 5 | 23.4 |
| 7  | 5 | 24.2 |
| 6  | 3 | 16.7 |
| 2  | 1 | 3.9  |
| 4  | 2 | 6.9  |
| 3  | 2 | 10.3 |
| 1  | 1 | 3.9  |
| 2  | 1 | 3.9  |
| 4  | 2 | 10   |
| 2  | 2 | 8    |
| 2  | 2 | 10.8 |
| 2  | 1 | 3.9  |
| 3  | 2 | 9.8  |
| 1  | 1 | 3.9  |
| 5  | 3 | 16.7 |
| 4  | 2 | 9.8  |
| 8  | 4 | 9.5  |
| 12 | 5 | 13.9 |
| 9  | 4 | 12.5 |
| 8  | 4 | 13.5 |

|    |   |      |
|----|---|------|
| 11 | 4 | 9.5  |
| 22 | 8 | 19.7 |
| 2  | 1 | 3.2  |
| 3  | 2 | 7.7  |
| 7  | 4 | 10.2 |
| 5  | 2 | 7.2  |
| 7  | 4 | 13.9 |
| 15 | 6 | 16.5 |
| 10 | 4 | 12.5 |
| 1  | 1 | 3    |
| 7  | 4 | 13.5 |
| 6  | 4 | 14.4 |
| 7  | 5 | 12.1 |
| 17 | 8 | 24.6 |
| 17 | 8 | 23.2 |
| 17 | 9 | 25.8 |
| 13 | 7 | 21.8 |
| 6  | 4 | 7.5  |
| 1  | 1 | 1.4  |
| 1  | 1 | 1.2  |
| 7  | 4 | 15.8 |
| 5  | 3 | 12.1 |
| 1  | 1 | 4.7  |
| 3  | 2 | 7.4  |
| 1  | 1 | 4.1  |
| 2  | 1 | 3.3  |
| 2  | 1 | 3.3  |
| 3  | 2 | 8    |
| 2  | 1 | 4.7  |
| 1  | 1 | 4.1  |
| 2  | 1 | 4.7  |
| 1  | 1 | 4.1  |
| 4  | 2 | 8.8  |
| 2  | 1 | 4.1  |
| 7  | 4 | 18.8 |
| 4  | 2 | 10.6 |
| 7  | 3 | 15.6 |
| 4  | 2 | 10.3 |
| 7  | 4 | 18.6 |
| 4  | 1 | 7    |
| 7  | 4 | 17.3 |
| 7  | 4 | 17.3 |
| 6  | 2 | 12.1 |
| 1  | 1 | 7    |
| 1  | 1 | 3.5  |
| 2  | 1 | 7    |
| 2  | 2 | 6.8  |

|    |   |      |
|----|---|------|
| 3  | 2 | 12.1 |
| 4  | 2 | 12.1 |
| 2  | 1 | 7    |
| 8  | 5 | 15.2 |
| 9  | 5 | 14.5 |
| 10 | 5 | 14.8 |
| 9  | 5 | 14.3 |
| 7  | 4 | 12.7 |
| 10 | 7 | 22.9 |
| 2  | 1 | 3.5  |
| 1  | 1 | 3.5  |
| 2  | 2 | 5.3  |
| 2  | 2 | 7.2  |
| 8  | 5 | 16.6 |
| 9  | 7 | 21.7 |
| 5  | 3 | 11.5 |
| 2  | 2 | 5.5  |
| 1  | 1 | 4.4  |
| 6  | 4 | 15.2 |
| 7  | 4 | 12.2 |
| 7  | 5 | 15.9 |
| 9  | 5 | 15.5 |
| 10 | 6 | 20.1 |
| 8  | 4 | 12.1 |
| 3  | 1 | 4.4  |
| 3  | 2 | 7.4  |
| 2  | 2 | 6.9  |
| 1  | 1 | 4.4  |
| 1  | 1 | 3.1  |
| 1  | 1 | 4.4  |
| 3  | 2 | 7.4  |
| 2  | 1 | 4.4  |
| 1  | 1 | 4.4  |
| 1  | 1 | 4.4  |
| 2  | 1 | 4.4  |
| 4  | 2 | 8.2  |
| 5  | 3 | 9.5  |
| 6  | 3 | 10.8 |
| 6  | 3 | 10.8 |
| 4  | 2 | 6.9  |
| 3  | 2 | 6.9  |
| 6  | 3 | 11.6 |
| 2  | 1 | 3.9  |
| 7  | 4 | 12.9 |
| 4  | 2 | 6.4  |
| 6  | 3 | 10.8 |
| 2  | 1 | 3.1  |



|    |   |      |
|----|---|------|
| 3  | 2 | 5.7  |
| 4  | 2 | 6.9  |
| 6  | 3 | 10.8 |
| 5  | 3 | 10.3 |
| 10 | 4 | 14.1 |
| 11 | 4 | 18.1 |
| 13 | 6 | 23.7 |
| 9  | 4 | 18.1 |
| 2  | 1 | 4.8  |
| 9  | 5 | 20.5 |
| 10 | 5 | 5.6  |
| 6  | 3 | 5    |
| 7  | 4 | 6.1  |
| 6  | 1 | 1.8  |
| 7  | 3 | 4.3  |
| 16 | 8 | 9.2  |
| 1  | 1 | 1.8  |
| 3  | 2 | 3.6  |
| 7  | 4 | 4.6  |
| 2  | 1 | 1.8  |
| 6  | 3 | 4.3  |
| 2  | 1 | 1.8  |
| 9  | 4 | 4.6  |
| 5  | 3 | 3.1  |
| 10 | 5 | 4.6  |
| 9  | 4 | 3.5  |
| 9  | 4 | 3.5  |
| 9  | 5 | 4.6  |
| 7  | 4 | 7.3  |
| 11 | 6 | 10.1 |
| 13 | 7 | 10.2 |
| 6  | 4 | 7.8  |
| 4  | 3 | 4.5  |
| 8  | 5 | 7.3  |
| 4  | 2 | 4.8  |
| 2  | 1 | 2.3  |
| 4  | 3 | 4.6  |
| 5  | 3 | 5.9  |
| 4  | 3 | 6.8  |
| 2  | 1 | 1.1  |
| 2  | 1 | 2.3  |
| 4  | 3 | 5.9  |
| 4  | 3 | 5.9  |
| 5  | 3 | 5.3  |
| 7  | 4 | 5    |
| 9  | 5 | 9.3  |
| 7  | 5 | 6.8  |

|    |   |      |
|----|---|------|
| 4  | 3 | 30.3 |
| 1  | 1 | 11.2 |
| 2  | 2 | 21.1 |
| 1  | 1 | 11.2 |
| 1  | 1 | 9.9  |
| 2  | 1 | 11.2 |
| 1  | 1 | 11.2 |
| 2  | 1 | 11.2 |
| 6  | 4 | 14.5 |
| 8  | 4 | 13.3 |
| 4  | 2 | 9    |
| 4  | 2 | 9.5  |
| 3  | 1 | 3.8  |
| 6  | 5 | 15.2 |
| 2  | 1 | 3.8  |
| 2  | 1 | 3.8  |
| 3  | 2 | 6.2  |
| 4  | 2 | 6.6  |
| 3  | 2 | 6.2  |
| 9  | 4 | 16.1 |
| 4  | 3 | 13.3 |
| 4  | 3 | 10   |
| 6  | 3 | 5.9  |
| 6  | 4 | 6.6  |
| 7  | 4 | 6.6  |
| 9  | 6 | 9.1  |
| 4  | 3 | 7    |
| 13 | 6 | 10.3 |
| 2  | 1 | 2.2  |
| 2  | 1 | 2.2  |
| 2  | 1 | 2.2  |
| 4  | 3 | 6.2  |
| 4  | 3 | 4.4  |
| 2  | 2 | 3.5  |
| 7  | 3 | 5.7  |
| 3  | 1 | 2.2  |
| 1  | 1 | 2.4  |
| 2  | 1 | 2.2  |
| 2  | 1 | 2.2  |
| 8  | 3 | 4.8  |
| 7  | 4 | 6.8  |
| 7  | 5 | 7.2  |
| 7  | 4 | 8.2  |
| 11 | 7 | 11.7 |
| 7  | 4 | 6.5  |
| 5  | 3 | 6    |
| 1  | 1 | 1.9  |

|    |   |      |
|----|---|------|
| 5  | 3 | 6    |
| 2  | 1 | 1.4  |
| 7  | 5 | 9.3  |
| 12 | 8 | 17.5 |
| 3  | 3 | 6.2  |
| 3  | 3 | 4.6  |
| 3  | 3 | 7.3  |
| 5  | 3 | 5.6  |
| 2  | 2 | 2.7  |
| 1  | 1 | 1.7  |
| 2  | 2 | 3.4  |
| 4  | 4 | 6.5  |
| 8  | 5 | 7.7  |
| 14 | 9 | 13.9 |
| 11 | 6 | 10.4 |
| 6  | 4 | 7.5  |
| 2  | 1 | 1.3  |
| 16 | 9 | 14.9 |
| 5  | 3 | 4.6  |
| 1  | 1 | 1.3  |
| 9  | 5 | 7.9  |
| 8  | 4 | 7    |
| 8  | 5 | 7.4  |
| 2  | 2 | 3.5  |
| 7  | 4 | 6.1  |
| 11 | 6 | 9.1  |
| 11 | 6 | 8.9  |
| 8  | 4 | 14.6 |
| 7  | 4 | 13.9 |
| 7  | 4 | 13.9 |
| 4  | 2 | 7.7  |
| 2  | 1 | 4.8  |
| 8  | 4 | 14.4 |
| 1  | 1 | 5.3  |
| 4  | 2 | 8.4  |
| 6  | 3 | 11.2 |
| 6  | 3 | 11   |
| 3  | 2 | 7.4  |
| 5  | 3 | 13.6 |
| 3  | 3 | 13.4 |
| 2  | 1 | 4.8  |
| 5  | 4 | 14.6 |
| 6  | 3 | 11   |
| 5  | 3 | 11   |
| 7  | 4 | 31.9 |
| 9  | 5 | 37.2 |
| 9  | 5 | 37.2 |

|    |    |      |
|----|----|------|
| 9  | 3  | 28.2 |
| 12 | 5  | 37.2 |
| 12 | 6  | 44.7 |
| 10 | 3  | 28.2 |
| 1  | 1  | 11.2 |
| 2  | 1  | 11.2 |
| 4  | 2  | 22.9 |
| 3  | 2  | 14.9 |
| 7  | 4  | 32.4 |
| 4  | 3  | 24.5 |
| 5  | 3  | 28.2 |
| 1  | 1  | 9.6  |
| 9  | 5  | 37.2 |
| 7  | 4  | 29.8 |
| 6  | 4  | 33   |
| 7  | 4  | 33   |
| 6  | 3  | 5.5  |
| 2  | 1  | 2    |
| 7  | 4  | 6.6  |
| 7  | 3  | 5.2  |
| 1  | 1  | 1.7  |
| 2  | 2  | 2.2  |
| 2  | 1  | 1.7  |
| 2  | 2  | 3.8  |
| 2  | 1  | 2    |
| 4  | 2  | 4.1  |
| 5  | 3  | 5.2  |
| 4  | 2  | 3.2  |
| 7  | 4  | 6.9  |
| 2  | 1  | 2    |
| 6  | 2  | 4.1  |
| 5  | 2  | 4.1  |
| 4  | 3  | 6    |
| 6  | 3  | 5.8  |
| 4  | 2  | 4.1  |
| 6  | 2  | 4.1  |
| 7  | 4  | 6.4  |
| 12 | 3  | 7.5  |
| 24 | 9  | 15.9 |
| 24 | 9  | 15.5 |
| 17 | 10 | 17.2 |
| 12 | 5  | 7.9  |
| 15 | 7  | 11.3 |
| 11 | 5  | 10.1 |
| 14 | 8  | 14.1 |
| 17 | 9  | 16.5 |
| 15 | 7  | 12   |

|    |   |      |
|----|---|------|
| 8  | 4 | 7.6  |
| 11 | 6 | 11.6 |
| 9  | 5 | 11.1 |
| 8  | 4 | 7.5  |
| 10 | 7 | 13.1 |
| 8  | 4 | 15.5 |
| 9  | 5 | 15   |
| 6  | 3 | 8    |
| 5  | 3 | 8    |
| 6  | 4 | 15.5 |
| 14 | 7 | 23.2 |
| 4  | 2 | 6    |
| 4  | 2 | 8.3  |
| 4  | 2 | 4    |
| 7  | 5 | 12.9 |
| 6  | 3 | 8    |
| 5  | 4 | 10.1 |
| 4  | 3 | 10.1 |
| 2  | 1 | 4.3  |
| 10 | 5 | 18.3 |
| 8  | 5 | 17.5 |
| 6  | 3 | 10.3 |
| 7  | 4 | 13.5 |
| 6  | 4 | 18.8 |
| 5  | 3 | 15.2 |
| 3  | 2 | 9.4  |
| 11 | 7 | 30.7 |
| 3  | 2 | 11.1 |
| 4  | 2 | 11.1 |
| 1  | 1 | 6.4  |
| 2  | 1 | 3.3  |
| 1  | 1 | 6.4  |
| 5  | 3 | 14.4 |
| 6  | 4 | 19.7 |
| 3  | 2 | 9.4  |
| 1  | 1 | 4.2  |
| 2  | 1 | 6.4  |
| 1  | 1 | 6.4  |
| 2  | 1 | 6.4  |
| 3  | 2 | 10.5 |
| 4  | 2 | 10.5 |
| 4  | 2 | 10.5 |
| 2  | 1 | 6.4  |
| 5  | 3 | 13   |
| 2  | 1 | 4.5  |
| 7  | 4 | 20.5 |
| 13 | 5 | 20.8 |

|    |   |      |
|----|---|------|
| 20 | 8 | 43.6 |
| 19 | 5 | 20.8 |
| 18 | 6 | 28.7 |
| 12 | 7 | 35.4 |
| 7  | 3 | 21.3 |
| 6  | 2 | 11.7 |
| 9  | 3 | 12.9 |
| 2  | 1 | 6.4  |
| 7  | 4 | 23.4 |
| 10 | 4 | 24   |
| 13 | 5 | 27.8 |
| 10 | 4 | 25.1 |
| 13 | 5 | 23.4 |
| 13 | 6 | 28.7 |
| 12 | 5 | 28.1 |
| 10 | 5 | 35.7 |
| 6  | 4 | 12.2 |
| 1  | 1 | 3.2  |
| 8  | 4 | 23.7 |
| 17 | 8 | 35.3 |
| 13 | 7 | 30.1 |
| 5  | 3 | 11.6 |
| 9  | 7 | 30.1 |
| 3  | 2 | 9.1  |
| 7  | 4 | 17.6 |
| 5  | 3 | 16.1 |
| 5  | 4 | 31.8 |
| 3  | 2 | 9.1  |
| 4  | 3 | 23.4 |
| 2  | 1 | 4.3  |
| 7  | 5 | 19.5 |
| 4  | 3 | 5.6  |
| 3  | 2 | 3.4  |
| 6  | 3 | 4.4  |
| 7  | 5 | 7.4  |
| 5  | 3 | 5.2  |
| 9  | 5 | 6.2  |
| 1  | 1 | 1.5  |
| 5  | 3 | 5.7  |
| 1  | 1 | 1.5  |
| 4  | 3 | 5.1  |
| 3  | 2 | 6.7  |
| 4  | 3 | 5.2  |
| 2  | 1 | 2.4  |
| 6  | 4 | 7.3  |
| 6  | 4 | 8.1  |
| 5  | 3 | 4.1  |

|    |    |      |
|----|----|------|
| 6  | 4  | 6.7  |
| 6  | 3  | 3.7  |
| 2  | 2  | 3.2  |
| 6  | 5  | 5.4  |
| 1  | 1  | 1.1  |
| 3  | 2  | 3.5  |
| 3  | 3  | 4.7  |
| 7  | 6  | 7.8  |
| 1  | 1  | 1.5  |
| 1  | 1  | 1.8  |
| 3  | 2  | 5    |
| 4  | 2  | 5.3  |
| 2  | 2  | 5.3  |
| 13 | 7  | 11.7 |
| 6  | 4  | 8.8  |
| 4  | 2  | 18.8 |
| 4  | 2  | 8.2  |
| 13 | 8  | 28   |
| 9  | 4  | 18.5 |
| 8  | 4  | 16.8 |
| 3  | 2  | 5.8  |
| 19 | 11 | 38.3 |
| 4  | 3  | 12.9 |
| 4  | 2  | 8.2  |
| 2  | 2  | 8.2  |
| 5  | 3  | 11.9 |
| 7  | 5  | 15.4 |
| 4  | 2  | 4.4  |
| 7  | 5  | 15.4 |
| 1  | 1  | 4.4  |
| 4  | 2  | 8.2  |
| 12 | 7  | 20.1 |
| 14 | 7  | 22.2 |
| 14 | 6  | 25.5 |
| 14 | 10 | 29.9 |
| 6  | 3  | 6.1  |
| 4  | 2  | 5.7  |
| 7  | 4  | 9.5  |
| 8  | 5  | 11.4 |
| 1  | 1  | 3.1  |
| 1  | 1  | 3.1  |
| 3  | 3  | 5.6  |
| 3  | 3  | 14.9 |
| 5  | 3  | 13.7 |
| 1  | 1  | 5.9  |
| 3  | 1  | 3.1  |
| 2  | 2  | 6.1  |

|     |    |      |
|-----|----|------|
| 3   | 2  | 6.6  |
| 3   | 2  | 5.7  |
| 6   | 3  | 4.6  |
| 11  | 7  | 11.8 |
| 11  | 6  | 9.3  |
| 4   | 3  | 3.9  |
| 5   | 4  | 6    |
| 13  | 7  | 9.7  |
| 2   | 1  | 1.7  |
| 2   | 1  | 1.7  |
| 2   | 1  | 1.8  |
| 2   | 1  | 1.7  |
| 6   | 4  | 5.4  |
| 4   | 3  | 5.4  |
| 4   | 2  | 2.8  |
| 1   | 1  | 1.8  |
| 3   | 2  | 3.1  |
| 6   | 5  | 7.4  |
| 9   | 3  | 21.1 |
| 1   | 1  | 7.1  |
| 10  | 4  | 20.3 |
| 334 | 12 | 57.3 |
| 246 | 13 | 55.3 |
| 270 | 16 | 66.6 |
| 241 | 14 | 58.9 |
| 2   | 2  | 9.3  |
| 6   | 3  | 8.6  |
| 6   | 4  | 14.1 |
| 11  | 7  | 21.3 |
| 4   | 2  | 6.8  |
| 5   | 3  | 7    |
| 11  | 6  | 16.7 |
| 4   | 3  | 7.9  |
| 3   | 2  | 6.8  |
| 7   | 4  | 10.8 |
| 5   | 3  | 8.4  |
| 1   | 1  | 3.9  |
| 7   | 5  | 16   |
| 2   | 2  | 7.5  |
| 6   | 3  | 11.7 |
| 4   | 3  | 9.4  |
| 4   | 2  | 4.8  |
| 5   | 3  | 4.6  |
| 7   | 4  | 6.5  |
| 4   | 2  | 3.2  |
| 3   | 2  | 3.2  |
| 4   | 3  | 4.7  |



|    |   |      |
|----|---|------|
| 3  | 2 | 2.5  |
| 3  | 2 | 4    |
| 3  | 3 | 5.3  |
| 4  | 3 | 5.5  |
| 5  | 3 | 4.3  |
| 2  | 1 | 1.9  |
| 8  | 5 | 7.9  |
| 6  | 5 | 6.7  |
| 11 | 6 | 8.5  |
| 6  | 4 | 12.1 |
| 9  | 5 | 17.9 |
| 8  | 4 | 12.9 |
| 3  | 2 | 7.1  |
| 7  | 4 | 14.5 |
| 6  | 3 | 9.5  |
| 3  | 2 | 7.9  |
| 1  | 1 | 2.9  |
| 2  | 2 | 8.7  |
| 3  | 3 | 8.7  |
| 5  | 3 | 8.7  |
| 4  | 3 | 8.4  |
| 6  | 3 | 18.5 |
| 6  | 4 | 25.2 |
| 2  | 2 | 13.5 |
| 5  | 4 | 26.1 |
| 1  | 1 | 7.2  |
| 2  | 2 | 11.3 |
| 2  | 1 | 7.2  |
| 2  | 1 | 7.2  |
| 3  | 2 | 11.7 |
| 5  | 3 | 18.5 |
| 2  | 1 | 7.2  |
| 4  | 3 | 19.4 |
| 2  | 1 | 7.2  |
| 4  | 2 | 14.4 |
| 4  | 2 | 15.3 |
| 4  | 2 | 13.5 |
| 7  | 3 | 18.5 |
| 8  | 5 | 32.4 |
| 6  | 4 | 25.2 |
| 4  | 2 | 7.8  |
| 5  | 3 | 10.2 |
| 8  | 4 | 12.4 |
| 6  | 2 | 7.8  |
| 4  | 2 | 9.6  |
| 2  | 1 | 4.7  |
| 2  | 1 | 4.7  |

|    |   |      |
|----|---|------|
| 2  | 1 | 3.1  |
| 2  | 1 | 3.1  |
| 4  | 2 | 7.8  |
| 4  | 1 | 7.8  |
| 3  | 2 | 7.8  |
| 1  | 1 | 4.7  |
| 4  | 2 | 7.8  |
| 5  | 2 | 7.1  |
| 4  | 3 | 19.5 |
| 5  | 3 | 15.3 |
| 3  | 2 | 8.4  |
| 6  | 3 | 12.7 |
| 4  | 2 | 8.4  |
| 5  | 3 | 12.3 |
| 2  | 1 | 5.2  |
| 1  | 1 | 5.2  |
| 1  | 1 | 5.2  |
| 4  | 2 | 8.4  |
| 1  | 1 | 5.2  |
| 2  | 1 | 5.2  |
| 2  | 1 | 3.9  |
| 3  | 2 | 8.4  |
| 3  | 2 | 8.4  |
| 8  | 1 | 13.3 |
| 10 | 1 | 18.9 |
| 11 | 1 | 18.9 |
| 13 | 1 | 19.1 |
| 8  | 1 | 13.3 |
| 12 | 1 | 18.9 |
| 10 | 1 | 18.9 |
| 6  | 3 | 13.3 |
| 10 | 1 | 17.6 |
| 9  | 1 | 19.1 |
| 8  | 5 | 17.6 |
| 10 | 1 | 18.9 |
| 4  | 2 | 20.8 |
| 5  | 3 | 28.9 |
| 3  | 2 | 20.8 |
| 3  | 2 | 19.3 |
| 6  | 5 | 40.8 |
| 7  | 4 | 33.5 |
| 3  | 2 | 18.3 |
| 7  | 4 | 29.3 |
| 2  | 1 | 8.4  |
| 4  | 2 | 18.3 |
| 3  | 2 | 13.1 |
| 4  | 3 | 26.2 |

|    |    |      |
|----|----|------|
| 3  | 3  | 24.7 |
| 1  | 1  | 5.9  |
| 1  | 1  | 5.9  |
| 1  | 1  | 5.9  |
| 2  | 1  | 5.9  |
| 1  | 1  | 5.9  |
| 2  | 2  | 9    |
| 3  | 2  | 2.7  |
| 5  | 3  | 4.1  |
| 2  | 1  | 1.3  |
| 2  | 1  | 1.6  |
| 2  | 1  | 1.5  |
| 4  | 2  | 2.7  |
| 2  | 1  | 1.2  |
| 4  | 2  | 3.5  |
| 2  | 1  | 1.2  |
| 2  | 1  | 1.2  |
| 6  | 3  | 3.4  |
| 4  | 3  | 6.6  |
| 5  | 3  | 3.7  |
| 6  | 4  | 5    |
| 18 | 10 | 10.4 |
| 19 | 11 | 9.9  |
| 4  | 2  | 5.5  |
| 1  | 1  | 0.8  |
| 7  | 5  | 5.6  |
| 4  | 4  | 3.5  |
| 2  | 2  | 3.3  |
| 2  | 1  | 3.9  |
| 1  | 1  | 3.9  |
| 4  | 2  | 3.3  |
| 7  | 4  | 5.7  |
| 7  | 4  | 5.7  |
| 3  | 2  | 3.3  |
| 6  | 2  | 33.1 |
| 7  | 2  | 33.1 |
| 6  | 2  | 33.1 |
| 5  | 2  | 33.1 |
| 7  | 2  | 33.1 |
| 4  | 2  | 33.1 |
| 8  | 2  | 33.1 |
| 6  | 2  | 33.1 |
| 3  | 2  | 33.1 |
| 4  | 2  | 33.1 |
| 5  | 2  | 33.1 |
| 2  | 1  | 13.6 |
| 3  | 2  | 33.1 |

|   |   |      |
|---|---|------|
| 6 | 2 | 33.1 |
| 7 | 2 | 33.1 |
| 5 | 2 | 33.1 |
| 5 | 2 | 33.1 |
| 6 | 3 | 7.3  |
| 1 | 1 | 2.6  |
| 4 | 3 | 8.1  |
| 4 | 2 | 4.8  |
| 2 | 1 | 2.6  |
| 1 | 1 | 2.5  |
| 2 | 1 | 3    |
| 1 | 1 | 3    |
| 2 | 1 | 2.6  |
| 2 | 2 | 4.5  |
| 4 | 2 | 4.5  |
| 2 | 2 | 3.3  |
| 3 | 2 | 22.7 |
| 2 | 1 | 17.4 |
| 3 | 2 | 24.4 |
| 1 | 1 | 17.4 |
| 1 | 1 | 8.1  |
| 3 | 2 | 22.7 |
| 4 | 2 | 6.5  |
| 4 | 2 | 6.5  |
| 2 | 1 | 3.5  |
| 4 | 2 | 6.5  |
| 3 | 2 | 6.5  |
| 2 | 1 | 3    |
| 1 | 1 | 3.5  |
| 2 | 1 | 6.3  |
| 2 | 2 | 6.5  |
| 4 | 2 | 9.3  |
| 4 | 2 | 3.5  |
| 3 | 2 | 5.5  |
| 1 | 1 | 3    |
| 2 | 1 | 3    |
| 3 | 3 | 8.9  |
| 1 | 1 | 3    |
| 1 | 1 | 3    |
| 2 | 1 | 3    |
| 2 | 1 | 3    |
| 2 | 2 | 13.2 |
| 4 | 2 | 13.4 |
| 2 | 1 | 4.6  |
| 3 | 2 | 13.4 |
| 2 | 1 | 4.6  |
| 2 | 1 | 4.6  |

|    |    |      |
|----|----|------|
| 5  | 3  | 4.4  |
| 2  | 1  | 1.8  |
| 3  | 2  | 2.8  |
| 2  | 1  | 1.8  |
| 4  | 3  | 4.2  |
| 1  | 1  | 1.8  |
| 1  | 1  | 1.8  |
| 2  | 1  | 1.8  |
| 1  | 1  | 2.4  |
| 1  | 1  | 1.8  |
| 2  | 1  | 1    |
| 3  | 2  | 2.8  |
| 3  | 2  | 2.8  |
| 5  | 3  | 12.4 |
| 3  | 2  | 8.6  |
| 2  | 1  | 5.2  |
| 2  | 2  | 9.6  |
| 3  | 2  | 12.4 |
| 1  | 1  | 7.9  |
| 2  | 2  | 12.4 |
| 1  | 1  | 4.5  |
| 2  | 2  | 8.2  |
| 3  | 2  | 12.8 |
| 2  | 1  | 5.4  |
| 2  | 1  | 5.8  |
| 2  | 1  | 5.8  |
| 1  | 1  | 5.8  |
| 2  | 1  | 5.8  |
| 4  | 2  | 6.8  |
| 16 | 8  | 16.9 |
| 14 | 8  | 18.7 |
| 11 | 6  | 13.8 |
| 5  | 3  | 7.5  |
| 6  | 4  | 8.1  |
| 2  | 1  | 2.2  |
| 4  | 3  | 9.5  |
| 5  | 3  | 9.3  |
| 11 | 6  | 15.1 |
| 18 | 10 | 23.5 |
| 13 | 6  | 17.1 |
| 4  | 3  | 7.5  |
| 3  | 2  | 5.2  |
| 10 | 5  | 13.1 |
| 5  | 3  | 9.5  |
| 13 | 7  | 15.6 |
| 15 | 8  | 20.6 |
| 14 | 7  | 17.2 |

|    |   |      |
|----|---|------|
| 12 | 6 | 16.7 |
| 6  | 2 | 9.2  |
| 3  | 2 | 9.7  |
| 2  | 1 | 4.9  |
| 4  | 3 | 12.7 |
| 1  | 1 | 4.9  |
| 3  | 2 | 9.2  |
| 3  | 1 | 4.9  |
| 2  | 1 | 4.9  |
| 2  | 1 | 4.9  |
| 3  | 2 | 9.7  |
| 2  | 1 | 4.9  |
| 2  | 1 | 4.9  |
| 2  | 1 | 4.9  |
| 4  | 2 | 9.7  |
| 3  | 2 | 13.8 |
| 5  | 4 | 16.9 |
| 7  | 4 | 16.6 |
| 2  | 1 | 7.8  |
| 9  | 3 | 12.5 |
| 9  | 4 | 20.8 |
| 2  | 1 | 4.6  |
| 2  | 1 | 4.6  |
| 2  | 1 | 7.8  |
| 2  | 1 | 6    |
| 2  | 1 | 4.3  |
| 4  | 2 | 17.1 |
| 2  | 2 | 9.4  |
| 2  | 1 | 4    |
| 2  | 1 | 6    |
| 4  | 2 | 13.8 |
| 4  | 2 | 13.8 |
| 6  | 3 | 17.4 |
| 10 | 4 | 20.5 |
| 4  | 2 | 13.8 |
| 9  | 3 | 17.1 |
| 3  | 2 | 15.4 |
| 1  | 1 | 7.2  |
| 2  | 1 | 7.2  |
| 2  | 1 | 7.2  |
| 2  | 1 | 7.2  |
| 2  | 1 | 7.2  |
| 1  | 1 | 7.2  |
| 2  | 1 | 7.2  |
| 2  | 1 | 7.2  |
| 3  | 2 | 10.2 |
| 3  | 2 | 10.2 |

|    |   |      |
|----|---|------|
| 6  | 3 | 15   |
| 1  | 1 | 4.8  |
| 2  | 2 | 9.9  |
| 1  | 1 | 4.8  |
| 1  | 1 | 10.2 |
| 1  | 1 | 5.1  |
| 2  | 1 | 5.1  |
| 4  | 3 | 12.3 |
| 2  | 1 | 3.1  |
| 4  | 2 | 6.6  |
| 2  | 1 | 4    |
| 3  | 2 | 6.6  |
| 2  | 1 | 4    |
| 4  | 2 | 6.6  |
| 6  | 3 | 6.9  |
| 3  | 1 | 4    |
| 2  | 1 | 4    |
| 2  | 1 | 4    |
| 1  | 1 | 2.6  |
| 2  | 1 | 2.6  |
| 2  | 1 | 4    |
| 4  | 3 | 8.2  |
| 5  | 3 | 9.5  |
| 7  | 3 | 6.2  |
| 3  | 2 | 3.8  |
| 1  | 1 | 2.8  |
| 15 | 9 | 23.2 |
| 1  | 1 | 2.9  |
| 1  | 1 | 5.3  |
| 5  | 3 | 6.2  |
| 1  | 1 | 2.8  |
| 1  | 1 | 1.5  |
| 4  | 3 | 9.5  |
| 5  | 2 | 8    |
| 4  | 2 | 8    |
| 4  | 3 | 25.8 |
| 4  | 2 | 15.9 |
| 5  | 3 | 23.8 |
| 2  | 2 | 15.9 |
| 12 | 5 | 37.7 |
| 12 | 5 | 39.7 |
| 4  | 2 | 20.5 |
| 4  | 3 | 18.5 |
| 2  | 1 | 11.9 |
| 5  | 3 | 23.8 |
| 7  | 3 | 23.8 |
| 6  | 3 | 23.8 |

|    |   |      |
|----|---|------|
| 1  | 1 | 8.6  |
| 2  | 1 | 7.3  |
| 1  | 1 | 7.3  |
| 6  | 3 | 27.8 |
| 7  | 4 | 35.8 |
| 7  | 4 | 37.7 |
| 6  | 3 | 27.8 |
| 3  | 2 | 1.7  |
| 2  | 1 | 0.7  |
| 1  | 1 | 0.9  |
| 2  | 1 | 0.8  |
| 1  | 1 | 0.9  |
| 5  | 3 | 4.7  |
| 3  | 2 | 4.6  |
| 6  | 4 | 7.1  |
| 3  | 2 | 3.6  |
| 5  | 3 | 8.5  |
| 8  | 4 | 5.9  |
| 2  | 1 | 2.2  |
| 2  | 1 | 2.2  |
| 4  | 3 | 8.5  |
| 3  | 2 | 3.3  |
| 2  | 1 | 2.2  |
| 4  | 2 | 4.6  |
| 4  | 2 | 4.6  |
| 1  | 1 | 2.2  |
| 2  | 1 | 2.2  |
| 5  | 3 | 14   |
| 3  | 2 | 6.9  |
| 5  | 3 | 14.2 |
| 2  | 1 | 2.9  |
| 1  | 1 | 4.6  |
| 1  | 1 | 5    |
| 1  | 1 | 5    |
| 3  | 2 | 9.4  |
| 8  | 4 | 18.6 |
| 5  | 3 | 14   |
| 5  | 4 | 16.3 |
| 4  | 2 | 9.8  |
| 4  | 2 | 4.7  |
| 4  | 2 | 9.8  |
| 1  | 1 | 4.2  |
| 1  | 1 | 5.1  |
| 4  | 2 | 15.7 |
| 11 | 4 | 23.1 |
| 11 | 6 | 31   |
| 9  | 5 | 27.2 |



|    |   |      |
|----|---|------|
| 12 | 5 | 27.2 |
| 8  | 4 | 16.8 |
| 3  | 2 | 14.6 |
| 3  | 3 | 13.1 |
| 1  | 1 | 3.4  |
| 8  | 3 | 19.8 |
| 10 | 5 | 27.2 |
| 6  | 4 | 17.2 |
| 6  | 4 | 23.1 |
| 4  | 2 | 9.7  |
| 2  | 1 | 5.6  |
| 3  | 2 | 15.7 |
| 4  | 3 | 18.7 |
| 2  | 1 | 5.6  |
| 4  | 3 | 19.8 |
| 6  | 3 | 19.8 |
| 3  | 2 | 10.1 |
| 3  | 3 | 13.6 |
| 5  | 3 | 9.9  |
| 4  | 2 | 7.4  |
| 2  | 1 | 4.3  |
| 1  | 1 | 4.6  |
| 1  | 1 | 4.3  |
| 1  | 1 | 4.3  |
| 2  | 2 | 7.1  |
| 3  | 2 | 7.9  |
| 3  | 1 | 7.1  |
| 5  | 3 | 9.7  |
| 3  | 2 | 8.9  |
| 1  | 1 | 2.9  |
| 2  | 1 | 2.9  |
| 1  | 1 | 2.6  |
| 2  | 1 | 2.9  |
| 2  | 1 | 3.9  |
| 1  | 1 | 3.2  |
| 3  | 2 | 7.7  |
| 3  | 3 | 5.9  |
| 4  | 3 | 5.1  |
| 2  | 1 | 1.7  |
| 2  | 2 | 3.5  |
| 3  | 2 | 3.7  |
| 1  | 1 | 1.7  |
| 2  | 1 | 1.7  |
| 2  | 1 | 1.7  |
| 3  | 2 | 3.4  |
| 2  | 2 | 13.8 |
| 4  | 2 | 8.4  |

|    |   |      |
|----|---|------|
| 13 | 7 | 22.1 |
| 10 | 6 | 18.5 |
| 12 | 6 | 20.9 |
| 4  | 2 | 6.5  |
| 7  | 4 | 16.5 |
| 2  | 1 | 3.1  |
| 2  | 1 | 3.4  |
| 10 | 4 | 13.7 |
| 11 | 6 | 18.7 |
| 8  | 5 | 16.8 |
| 2  | 2 | 6.5  |
| 5  | 4 | 11.3 |
| 11 | 5 | 17.7 |
| 3  | 2 | 7.4  |
| 15 | 8 | 24.7 |
| 4  | 2 | 8.2  |
| 3  | 2 | 7.6  |
| 4  | 2 | 7.6  |
| 7  | 4 | 11.8 |
| 7  | 3 | 9.6  |
| 2  | 1 | 3.2  |
| 3  | 2 | 5.2  |
| 4  | 2 | 7.6  |
| 4  | 3 | 9.6  |
| 5  | 3 | 9.6  |
| 3  | 2 | 7.6  |
| 2  | 1 | 4.4  |
| 3  | 2 | 8    |
| 2  | 1 | 3.2  |
| 7  | 4 | 13.1 |
| 7  | 4 | 14.7 |
| 4  | 1 | 3.8  |
| 4  | 1 | 3.8  |
| 6  | 1 | 3.8  |
| 3  | 2 | 6.3  |
| 1  | 1 | 3.8  |
| 4  | 1 | 3.8  |
| 6  | 2 | 6.3  |
| 2  | 1 | 3.8  |
| 3  | 1 | 3.8  |
| 4  | 1 | 3.8  |
| 4  | 1 | 3.8  |
| 4  | 1 | 3.8  |
| 2  | 1 | 3.8  |
| 3  | 1 | 3.8  |
| 2  | 2 | 10.2 |
| 4  | 2 | 6.8  |

|    |   |      |
|----|---|------|
| 4  | 3 | 9.3  |
| 4  | 3 | 12.9 |
| 5  | 3 | 14   |
| 2  | 2 | 6.8  |
| 1  | 1 | 4.1  |
| 2  | 2 | 6.8  |
| 1  | 1 | 2.7  |
| 2  | 2 | 6.8  |
| 4  | 2 | 5.4  |
| 2  | 2 | 5.6  |
| 2  | 2 | 5.2  |
| 2  | 2 | 5.2  |
| 4  | 2 | 11.1 |
| 3  | 2 | 11.1 |
| 2  | 1 | 4.4  |
| 3  | 2 | 9.8  |
| 4  | 2 | 11.1 |
| 1  | 1 | 6.8  |
| 3  | 3 | 14.5 |
| 1  | 1 | 6.8  |
| 2  | 1 | 6.8  |
| 3  | 2 | 8.9  |
| 3  | 2 | 5.8  |
| 12 | 6 | 18.7 |
| 8  | 5 | 15.2 |
| 7  | 5 | 16.9 |
| 3  | 2 | 8.1  |
| 12 | 6 | 18.2 |
| 7  | 4 | 17.8 |
| 4  | 2 | 7.2  |
| 5  | 4 | 12.5 |
| 3  | 2 | 7.2  |
| 1  | 1 | 2.5  |
| 6  | 4 | 10.4 |
| 7  | 4 | 13.4 |
| 3  | 2 | 7.9  |
| 16 | 9 | 21.7 |
| 4  | 2 | 15.4 |
| 6  | 4 | 21.9 |
| 4  | 3 | 14   |
| 2  | 1 | 6.8  |
| 3  | 2 | 10   |
| 4  | 3 | 17.9 |
| 6  | 5 | 24.7 |
| 10 | 5 | 28   |
| 1  | 1 | 6.8  |
| 1  | 1 | 6.8  |

|    |   |      |
|----|---|------|
| 2  | 1 | 10   |
| 3  | 2 | 15.4 |
| 5  | 3 | 17.2 |
| 7  | 4 | 26.9 |
| 11 | 7 | 41.6 |
| 4  | 3 | 9.7  |
| 1  | 1 | 4.1  |
| 1  | 1 | 3.2  |
| 4  | 3 | 10.1 |
| 2  | 2 | 5.5  |
| 5  | 3 | 8.5  |
| 2  | 1 | 4.1  |
| 3  | 1 | 4.1  |
| 2  | 2 | 6.4  |
| 1  | 1 | 4.1  |
| 2  | 1 | 4.1  |
| 5  | 2 | 7.4  |
| 4  | 2 | 7.4  |
| 5  | 2 | 7.4  |
| 5  | 3 | 9.7  |
| 4  | 2 | 5.9  |
| 1  | 1 | 2.6  |
| 1  | 1 | 2.6  |
| 1  | 1 | 2.6  |
| 2  | 2 | 6.6  |
| 1  | 1 | 2.6  |
| 3  | 2 | 15.8 |
| 2  | 1 | 8.6  |
| 2  | 1 | 8.6  |
| 1  | 1 | 8.6  |
| 4  | 2 | 10.4 |
| 7  | 4 | 14.9 |
| 11 | 5 | 24.4 |
| 6  | 3 | 14.3 |
| 2  | 1 | 3.9  |
| 6  | 3 | 12.8 |
| 4  | 3 | 11.9 |
| 3  | 2 | 8.9  |
| 2  | 2 | 10.4 |
| 3  | 2 | 8.6  |
| 3  | 3 | 14.3 |
| 5  | 3 | 4.4  |
| 13 | 6 | 10.7 |
| 9  | 5 | 10.2 |
| 8  | 5 | 10.2 |
| 6  | 4 | 8.7  |
| 15 | 8 | 14.3 |

|    |    |      |
|----|----|------|
| 4  | 1  | 2.5  |
| 5  | 3  | 7    |
| 10 | 5  | 9.2  |
| 4  | 3  | 6.7  |
| 7  | 4  | 8.2  |
| 7  | 4  | 8    |
| 4  | 3  | 7    |
| 2  | 1  | 2.4  |
| 12 | 10 | 16.8 |
| 2  | 2  | 10.2 |
| 3  | 1  | 6.7  |
| 3  | 2  | 10   |
| 2  | 1  | 6.7  |
| 4  | 1  | 6.7  |
| 2  | 1  | 6.7  |
| 2  | 1  | 6.7  |
| 1  | 1  | 6.7  |
| 4  | 1  | 17.5 |
| 2  | 1  | 17.5 |
| 1  | 1  | 17.5 |
| 2  | 2  | 37.3 |
| 1  | 1  | 17.5 |
| 1  | 1  | 17.5 |
| 3  | 2  | 37.3 |
| 3  | 2  | 3.8  |
| 4  | 2  | 4.4  |
| 6  | 3  | 5.7  |
| 9  | 5  | 10   |
| 3  | 2  | 3.8  |
| 5  | 3  | 6.1  |
| 3  | 2  | 4.8  |
| 2  | 1  | 2.5  |
| 4  | 3  | 5.4  |
| 3  | 2  | 3.5  |
| 3  | 2  | 4.8  |
| 1  | 1  | 1.8  |
| 2  | 1  | 1.8  |
| 2  | 1  | 2.5  |
| 3  | 2  | 4.7  |
| 4  | 3  | 6.9  |
| 2  | 2  | 20.7 |
| 1  | 1  | 6    |
| 2  | 1  | 6.9  |
| 3  | 3  | 16.1 |
| 3  | 2  | 20.7 |
| 2  | 1  | 6.9  |
| 4  | 3  | 30.9 |

|    |   |      |
|----|---|------|
| 1  | 1 | 3.2  |
| 2  | 1 | 6.9  |
| 1  | 1 | 17.5 |
| 2  | 1 | 17.5 |
| 3  | 2 | 24.4 |
| 1  | 1 | 17.5 |
| 4  | 2 | 9.2  |
| 4  | 2 | 7.9  |
| 1  | 1 | 4.5  |
| 3  | 2 | 7.2  |
| 12 | 6 | 19   |
| 13 | 8 | 21.5 |
| 4  | 3 | 8.5  |
| 3  | 2 | 6.4  |
| 3  | 2 | 6.4  |
| 6  | 4 | 11.9 |
| 5  | 3 | 8.1  |
| 2  | 1 | 4.5  |
| 9  | 6 | 19.4 |
| 3  | 2 | 4.7  |
| 5  | 3 | 7.7  |
| 5  | 4 | 11.1 |
| 4  | 2 | 5.9  |
| 3  | 2 | 5.2  |
| 4  | 2 | 5.9  |
| 2  | 1 | 2.1  |
| 2  | 1 | 2.1  |
| 1  | 1 | 2.1  |
| 4  | 2 | 5.9  |
| 2  | 2 | 5.9  |
| 2  | 1 | 3.8  |
| 2  | 1 | 3.8  |
| 2  | 1 | 1.8  |
| 2  | 2 | 6.5  |
| 2  | 1 | 2    |
| 1  | 1 | 1.8  |
| 5  | 3 | 7.6  |
| 1  | 1 | 2    |
| 2  | 1 | 2    |
| 4  | 2 | 4.7  |
| 4  | 2 | 5.8  |
| 2  | 1 | 2    |
| 5  | 2 | 13.5 |
| 4  | 3 | 25.3 |
| 4  | 1 | 8.2  |
| 2  | 1 | 8.2  |
| 3  | 2 | 13.5 |

|   |   |      |
|---|---|------|
| 6 | 3 | 18.8 |
| 2 | 1 | 5.3  |
| 3 | 1 | 8.2  |
| 2 | 1 | 8.2  |
| 6 | 1 | 8.2  |
| 4 | 3 | 16.3 |
| 4 | 3 | 25.3 |
| 3 | 2 | 11   |
| 2 | 1 | 8.2  |
| 2 | 1 | 8.2  |
| 3 | 1 | 8.2  |
| 2 | 1 | 8.2  |
| 2 | 1 | 8.2  |
| 3 | 1 | 8.2  |
| 3 | 1 | 8.2  |
| 4 | 2 | 17.7 |
| 3 | 2 | 17   |
| 3 | 2 | 27.2 |
| 4 | 2 | 17   |
| 3 | 2 | 17   |
| 2 | 1 | 18.4 |
| 2 | 1 | 8.8  |
| 2 | 1 | 8.8  |
| 2 | 1 | 8.2  |
| 3 | 2 | 17   |
| 3 | 2 | 17   |
| 2 | 1 | 8.8  |
| 2 | 1 | 18.4 |
| 2 | 2 | 17   |
| 3 | 2 | 8.8  |
| 2 | 1 | 4.2  |
| 2 | 1 | 4.7  |
| 2 | 1 | 4.7  |
| 2 | 1 | 4.7  |
| 2 | 1 | 4.7  |
| 2 | 1 | 4.7  |
| 2 | 2 | 3.4  |
| 3 | 2 | 16.5 |
| 2 | 1 | 8.9  |
| 4 | 2 | 16.5 |
| 2 | 1 | 8.9  |
| 3 | 2 | 16.5 |
| 2 | 1 | 1.6  |
| 2 | 1 | 8.9  |
| 1 | 1 | 2    |
| 6 | 3 | 4.3  |
| 2 | 1 | 8.9  |

|    |   |      |
|----|---|------|
| 3  | 2 | 3.1  |
| 4  | 2 | 2.6  |
| 5  | 3 | 3.7  |
| 11 | 6 | 8.5  |
| 13 | 7 | 9.7  |
| 5  | 4 | 5    |
| 11 | 6 | 7.4  |
| 1  | 1 | 1.4  |
| 5  | 3 | 4.1  |
| 5  | 4 | 4.3  |
| 3  | 2 | 2.7  |
| 5  | 3 | 5.4  |
| 1  | 1 | 1.5  |
| 2  | 1 | 1.4  |
| 2  | 1 | 1.4  |
| 3  | 2 | 2.1  |
| 7  | 4 | 5    |
| 7  | 4 | 5    |
| 9  | 7 | 7.7  |
| 2  | 2 | 5.7  |
| 5  | 3 | 8.2  |
| 4  | 2 | 4.9  |
| 1  | 1 | 2.5  |
| 2  | 2 | 4.9  |
| 2  | 1 | 2.5  |
| 1  | 1 | 2.5  |
| 2  | 2 | 5.7  |
| 2  | 1 | 2.5  |
| 2  | 1 | 3.5  |
| 6  | 3 | 9.2  |
| 5  | 4 | 10.6 |
| 7  | 5 | 13.2 |
| 4  | 1 | 28.6 |
| 5  | 2 | 42.9 |
| 5  | 2 | 42.9 |
| 5  | 2 | 42.9 |
| 7  | 3 | 50   |
| 8  | 3 | 50   |
| 2  | 1 | 14.3 |
| 1  | 1 | 14.3 |
| 2  | 2 | 21.4 |
| 5  | 2 | 42.9 |
| 5  | 2 | 42.9 |
| 3  | 2 | 42.9 |
| 3  | 2 | 42.9 |
| 2  | 1 | 14.3 |
| 1  | 1 | 14.3 |



|    |   |      |
|----|---|------|
| 6  | 2 | 42.9 |
| 4  | 2 | 42.9 |
| 4  | 2 | 42.9 |
| 3  | 2 | 42.9 |
| 5  | 2 | 9.7  |
| 5  | 3 | 13.9 |
| 4  | 1 | 6.5  |
| 5  | 2 | 9.4  |
| 3  | 2 | 9.7  |
| 5  | 2 | 9.7  |
| 5  | 2 | 9.7  |
| 2  | 2 | 7.1  |
| 2  | 1 | 6.5  |
| 2  | 2 | 9.4  |
| 4  | 2 | 9.7  |
| 3  | 1 | 6.5  |
| 2  | 1 | 6.5  |
| 3  | 2 | 9.7  |
| 8  | 3 | 12.8 |
| 5  | 2 | 9.7  |
| 4  | 3 | 12.8 |
| 3  | 1 | 6.5  |
| 4  | 2 | 6.5  |
| 9  | 6 | 15.5 |
| 7  | 4 | 10.1 |
| 10 | 6 | 17   |
| 3  | 3 | 8.3  |
| 11 | 7 | 22.1 |
| 3  | 2 | 6.3  |
| 5  | 3 | 7.6  |
| 3  | 2 | 6.8  |
| 2  | 2 | 5.4  |
| 6  | 4 | 10.1 |
| 8  | 6 | 14.4 |
| 3  | 2 | 5.5  |
| 1  | 1 | 3.1  |
| 1  | 1 | 4.2  |
| 6  | 4 | 15.7 |
| 4  | 3 | 8.3  |
| 7  | 4 | 12.5 |
| 2  | 1 | 4.1  |
| 3  | 2 | 7.3  |
| 1  | 1 | 3.4  |
| 1  | 1 | 3.6  |
| 2  | 2 | 7.5  |
| 2  | 1 | 4.1  |
| 3  | 2 | 11.5 |

|   |   |      |
|---|---|------|
| 4 | 2 | 8.7  |
| 2 | 2 | 10.1 |
| 1 | 1 | 6.6  |
| 1 | 1 | 6.6  |
| 3 | 2 | 12.8 |
| 1 | 1 | 6.2  |
| 3 | 3 | 11   |
| 1 | 1 | 6.2  |
| 1 | 1 | 6.2  |
| 3 | 2 | 10.6 |
| 2 | 2 | 4.7  |
| 2 | 1 | 1.6  |
| 2 | 2 | 4.5  |
| 1 | 1 | 1.6  |
| 2 | 1 | 1.6  |
| 3 | 2 | 6.4  |
| 3 | 2 | 4.6  |
| 3 | 2 | 4.6  |
| 4 | 3 | 8.5  |
| 2 | 1 | 2.9  |
| 3 | 2 | 6.4  |
| 2 | 1 | 2.9  |
| 3 | 2 | 6.1  |
| 3 | 2 | 6.8  |
| 3 | 2 | 5.2  |
| 3 | 2 | 6.8  |
| 4 | 3 | 9.6  |
| 3 | 2 | 7    |
| 3 | 2 | 7    |
| 4 | 2 | 6.8  |
| 4 | 2 | 6.8  |
| 1 | 1 | 3.3  |
| 3 | 2 | 8.2  |
| 2 | 1 | 3.3  |
| 1 | 1 | 4.9  |
| 2 | 1 | 3.3  |
| 2 | 1 | 3.3  |
| 1 | 1 | 3.3  |
| 3 | 1 | 3.3  |
| 2 | 1 | 3.3  |
| 6 | 3 | 10   |
| 3 | 2 | 10.4 |
| 2 | 1 | 3    |
| 3 | 2 | 7.4  |
| 4 | 2 | 8    |
| 4 | 3 | 15.4 |
| 4 | 2 | 9.5  |

|   |   |      |
|---|---|------|
| 3 | 2 | 9.5  |
| 3 | 2 | 8.3  |
| 1 | 1 | 3    |
| 2 | 1 | 4.4  |
| 4 | 1 | 5.9  |
| 3 | 2 | 10.4 |
| 7 | 3 | 13.9 |
| 6 | 2 | 10.4 |
| 4 | 3 | 15.4 |
| 4 | 2 | 3.1  |
| 3 | 2 | 5.1  |
| 2 | 1 | 2.4  |
| 3 | 2 | 3.1  |
| 1 | 1 | 2.4  |
| 1 | 1 | 2.4  |
| 1 | 1 | 2.6  |
| 2 | 1 | 15.2 |
| 3 | 1 | 15.2 |
| 4 | 1 | 15.2 |
| 2 | 1 | 15.2 |
| 2 | 1 | 15.2 |
| 3 | 1 | 15.2 |
| 3 | 2 | 20.5 |
| 7 | 1 | 15.2 |
| 6 | 1 | 15.2 |
| 3 | 1 | 20.5 |
| 2 | 1 | 15.2 |
| 2 | 1 | 15.2 |
| 4 | 1 | 15.2 |
| 3 | 1 | 15.2 |
| 2 | 1 | 15.2 |
| 2 | 2 | 9.8  |
| 4 | 3 | 14.1 |
| 1 | 1 | 7    |
| 2 | 1 | 4.3  |
| 4 | 2 | 7.1  |
| 6 | 4 | 12.1 |
| 2 | 1 | 4.3  |
| 6 | 3 | 10.7 |
| 1 | 1 | 4.3  |
| 2 | 1 | 4.3  |
| 2 | 2 | 7.1  |
| 2 | 2 | 7.4  |
| 2 | 1 | 4.3  |
| 5 | 3 | 10.7 |
| 4 | 2 | 7.1  |
| 2 | 1 | 4.3  |



|    |   |      |
|----|---|------|
| 8  | 4 | 19   |
| 5  | 4 | 19   |
| 6  | 4 | 14.4 |
| 7  | 4 | 13.6 |
| 2  | 1 | 3.6  |
| 5  | 4 | 20   |
| 4  | 1 | 4.4  |
| 1  | 1 | 2.8  |
| 5  | 3 | 11.3 |
| 6  | 4 | 14.1 |
| 3  | 2 | 8.5  |
| 2  | 2 | 12.6 |
| 3  | 2 | 6.7  |
| 3  | 2 | 8.7  |
| 3  | 2 | 8.7  |
| 4  | 2 | 8.5  |
| 10 | 5 | 22.8 |
| 2  | 2 | 9.6  |
| 2  | 2 | 5.6  |
| 2  | 2 | 10.1 |
| 2  | 2 | 11.6 |
| 4  | 2 | 10.1 |
| 3  | 1 | 7.1  |
| 4  | 1 | 7.1  |
| 1  | 1 | 7.1  |
| 1  | 1 | 7.1  |
| 5  | 1 | 7.1  |
| 3  | 1 | 7.1  |
| 1  | 1 | 7.1  |
| 5  | 1 | 7.1  |
| 3  | 1 | 7.1  |
| 3  | 2 | 9.6  |
| 2  | 1 | 2.9  |
| 1  | 1 | 2.9  |
| 3  | 2 | 5.9  |
| 3  | 2 | 4.3  |
| 2  | 1 | 1.9  |
| 1  | 1 | 2.9  |
| 3  | 3 | 7.8  |
| 5  | 3 | 7.3  |
| 1  | 1 | 1.9  |
| 3  | 2 | 27.8 |
| 4  | 1 | 13   |
| 5  | 2 | 20.1 |
| 1  | 1 | 20.7 |
| 1  | 1 | 20.7 |
| 3  | 2 | 33.7 |

|    |    |      |
|----|----|------|
| 4  | 1  | 20.7 |
| 4  | 1  | 20.7 |
| 4  | 1  | 20.7 |
| 4  | 1  | 20.7 |
| 3  | 1  | 20.7 |
| 3  | 1  | 2.5  |
| 2  | 1  | 2.1  |
| 3  | 2  | 4.6  |
| 2  | 1  | 2.1  |
| 1  | 1  | 2.5  |
| 1  | 1  | 2.5  |
| 2  | 1  | 2.5  |
| 2  | 1  | 2.5  |
| 3  | 1  | 2.5  |
| 3  | 2  | 6.3  |
| 2  | 1  | 5.9  |
| 1  | 1  | 3    |
| 3  | 2  | 1.7  |
| 5  | 3  | 2.4  |
| 5  | 3  | 2.4  |
| 2  | 1  | 0.9  |
| 1  | 1  | 0.8  |
| 3  | 3  | 2.5  |
| 2  | 2  | 1.2  |
| 4  | 3  | 2.2  |
| 3  | 2  | 1.5  |
| 7  | 4  | 3.5  |
| 7  | 6  | 4.7  |
| 1  | 1  | 4.7  |
| 1  | 1  | 3.9  |
| 2  | 2  | 7.1  |
| 4  | 2  | 7.9  |
| 3  | 2  | 8.4  |
| 1  | 1  | 3.9  |
| 3  | 2  | 9.1  |
| 6  | 3  | 12.3 |
| 4  | 2  | 7.9  |
| 2  | 2  | 7.9  |
| 4  | 2  | 7.9  |
| 5  | 3  | 12.3 |
| 3  | 2  | 7.9  |
| 4  | 2  | 7.9  |
| 2  | 2  | 2.2  |
| 17 | 10 | 12.4 |
| 3  | 2  | 3.2  |
| 5  | 4  | 4.9  |
| 15 | 9  | 11.3 |

|    |   |      |
|----|---|------|
| 2  | 1 | 1.8  |
| 4  | 3 | 3.6  |
| 1  | 1 | 1.2  |
| 3  | 2 | 3    |
| 2  | 1 | 1.8  |
| 2  | 1 | 1.8  |
| 2  | 1 | 1.8  |
| 3  | 2 | 2.7  |
| 2  | 1 | 1.1  |
| 1  | 1 | 0.8  |
| 2  | 2 | 3.2  |
| 3  | 2 | 9.3  |
| 1  | 1 | 5.6  |
| 2  | 2 | 2.8  |
| 3  | 2 | 3.1  |
| 5  | 4 | 5.4  |
| 2  | 2 | 3.1  |
| 3  | 2 | 2.8  |
| 1  | 1 | 1.9  |
| 2  | 2 | 3    |
| 5  | 3 | 4.3  |
| 8  | 5 | 7.2  |
| 2  | 1 | 4    |
| 5  | 3 | 14.2 |
| 10 | 6 | 21   |
| 4  | 3 | 10.5 |
| 6  | 2 | 7.7  |
| 6  | 3 | 10.2 |
| 4  | 1 | 4    |
| 2  | 1 | 4    |
| 2  | 2 | 7.7  |
| 4  | 2 | 7.7  |
| 4  | 3 | 10.5 |
| 9  | 3 | 12.8 |
| 2  | 1 | 4    |
| 4  | 2 | 7.7  |
| 4  | 3 | 9.9  |
| 2  | 1 | 4    |
| 6  | 3 | 10.2 |
| 3  | 3 | 12.8 |
| 3  | 2 | 7.7  |
| 9  | 3 | 10.2 |
| 2  | 1 | 1.8  |
| 3  | 2 | 2.8  |
| 3  | 2 | 3    |
| 1  | 1 | 1.8  |
| 4  | 2 | 2.5  |

|    |   |      |
|----|---|------|
| 1  | 1 | 1.8  |
| 2  | 1 | 1.8  |
| 1  | 1 | 1.8  |
| 1  | 1 | 1.8  |
| 2  | 1 | 1.8  |
| 1  | 1 | 4.7  |
| 2  | 1 | 4.7  |
| 8  | 4 | 32.1 |
| 1  | 1 | 7.8  |
| 3  | 2 | 11.9 |
| 2  | 1 | 7.8  |
| 4  | 2 | 11.9 |
| 4  | 2 | 11.9 |
| 4  | 2 | 11.9 |
| 4  | 1 | 7.8  |
| 2  | 1 | 7.8  |
| 1  | 1 | 7.8  |
| 3  | 2 | 11.9 |
| 4  | 2 | 11.9 |
| 1  | 1 | 7.8  |
| 1  | 1 | 7.8  |
| 1  | 1 | 7.8  |
| 3  | 2 | 11.9 |
| 2  | 1 | 7.8  |
| 3  | 2 | 11.9 |
| 2  | 1 | 7.8  |
| 1  | 1 | 6    |
| 5  | 3 | 14.8 |
| 3  | 2 | 11.4 |
| 5  | 3 | 14.8 |
| 12 | 5 | 26.2 |
| 5  | 3 | 12.3 |
| 1  | 1 | 3.2  |
| 2  | 1 | 6    |
| 3  | 2 | 9.5  |
| 2  | 2 | 7.3  |
| 4  | 3 | 14.7 |
| 2  | 1 | 4.5  |
| 3  | 2 | 7.6  |
| 3  | 2 | 4.8  |
| 2  | 2 | 5.6  |
| 1  | 1 | 4.8  |
| 1  | 1 | 4.5  |
| 3  | 2 | 7.3  |
| 1  | 1 | 3.3  |
| 4  | 2 | 5.5  |
| 2  | 2 | 5.5  |



|   |   |      |
|---|---|------|
| 2 | 1 | 3.3  |
| 1 | 1 | 3.3  |
| 3 | 3 | 8.3  |
| 1 | 1 | 2.7  |
| 7 | 4 | 9.3  |
| 2 | 2 | 4.7  |
| 2 | 2 | 4.6  |
| 2 | 2 | 3.8  |
| 9 | 4 | 10.4 |
| 1 | 1 | 2.7  |
| 2 | 1 | 2.7  |
| 1 | 1 | 2    |
| 3 | 2 | 4.6  |
| 2 | 1 | 2.7  |
| 1 | 1 | 2.7  |
| 5 | 2 | 4.7  |
| 4 | 3 | 8.6  |
| 3 | 2 | 9.7  |
| 7 | 6 | 17.9 |
| 2 | 1 | 7.6  |
| 3 | 2 | 11.4 |
| 3 | 2 | 11.4 |
| 2 | 1 | 4.9  |
| 2 | 1 | 7.6  |
| 2 | 1 | 7.6  |
| 2 | 1 | 7.6  |
| 3 | 2 | 7.7  |
| 3 | 2 | 8.1  |
| 3 | 2 | 8.1  |
| 7 | 3 | 11.1 |
| 9 | 5 | 15.4 |
| 4 | 1 | 5.3  |
| 3 | 2 | 6.1  |
| 7 | 5 | 15.4 |
| 4 | 2 | 7.5  |
| 1 | 1 | 5.5  |
| 1 | 1 | 3.2  |
| 4 | 2 | 5.1  |
| 9 | 5 | 13.6 |
| 3 | 2 | 8.5  |
| 1 | 1 | 24.7 |
| 2 | 1 | 24.7 |
| 3 | 2 | 4.5  |
| 2 | 1 | 3.3  |
| 1 | 1 | 3.3  |
| 2 | 1 | 3.3  |
| 2 | 1 | 3.3  |

|   |   |      |
|---|---|------|
| 3 | 2 | 3.5  |
| 1 | 1 | 3.3  |
| 3 | 2 | 3.5  |
| 3 | 2 | 3.5  |
| 4 | 2 | 3.5  |
| 3 | 2 | 3.5  |
| 2 | 2 | 6.5  |
| 6 | 3 | 4.2  |
| 4 | 3 | 5.3  |
| 2 | 1 | 6.5  |
| 2 | 2 | 17.9 |
| 2 | 1 | 6.5  |
| 1 | 1 | 6.5  |
| 2 | 1 | 6.5  |
| 4 | 1 | 6.5  |
| 2 | 1 | 6.5  |
| 2 | 1 | 6.5  |
| 1 | 1 | 5.7  |
| 2 | 1 | 6.5  |
| 2 | 1 | 6.5  |
| 2 | 1 | 5.7  |
| 3 | 2 | 12.2 |
| 2 | 1 | 3.4  |
| 5 | 2 | 8.6  |
| 2 | 1 | 3.4  |
| 3 | 2 | 5.6  |
| 1 | 1 | 3.4  |
| 1 | 1 | 8.8  |
| 3 | 2 | 15.5 |
| 1 | 1 | 8.8  |
| 3 | 2 | 16.9 |
| 5 | 3 | 23.6 |
| 2 | 1 | 8.8  |
| 1 | 1 | 8.1  |
| 2 | 2 | 16.9 |
| 2 | 1 | 8.8  |
| 1 | 1 | 8.8  |
| 2 | 1 | 8.8  |
| 1 | 1 | 8.8  |
| 1 | 1 | 8.8  |
| 3 | 2 | 16.9 |
| 2 | 1 | 8.8  |
| 3 | 1 | 8.8  |
| 2 | 1 | 8.8  |
| 2 | 1 | 1.9  |
| 1 | 1 | 1.1  |
| 1 | 1 | 1.9  |

|   |   |      |
|---|---|------|
| 3 | 2 | 3    |
| 1 | 1 | 2.8  |
| 2 | 1 | 4    |
| 1 | 1 | 3    |
| 3 | 2 | 4.2  |
| 4 | 2 | 4.2  |
| 3 | 1 | 3    |
| 4 | 2 | 4.2  |
| 1 | 1 | 3    |
| 4 | 2 | 4.2  |
| 3 | 2 | 4.2  |
| 3 | 1 | 3    |
| 1 | 1 | 3    |
| 2 | 1 | 3    |
| 4 | 2 | 4.2  |
| 3 | 1 | 4.2  |
| 4 | 1 | 3    |
| 1 | 1 | 3    |
| 3 | 1 | 3    |
| 2 | 1 | 4.4  |
| 6 | 4 | 14.5 |
| 4 | 2 | 9    |
| 6 | 3 | 12.1 |
| 2 | 2 | 8.7  |
| 5 | 4 | 17.2 |
| 4 | 3 | 13.1 |
| 4 | 3 | 12.1 |
| 3 | 2 | 9    |
| 2 | 1 | 2.2  |
| 3 | 2 | 7.5  |
| 8 | 5 | 18.9 |
| 6 | 3 | 11.6 |
| 4 | 2 | 7.5  |
| 2 | 2 | 14   |
| 2 | 2 | 14.3 |
| 5 | 3 | 18.6 |
| 4 | 2 | 9    |
| 8 | 4 | 16.2 |
| 3 | 2 | 9    |
| 5 | 3 | 13.3 |
| 2 | 1 | 3.4  |
| 5 | 3 | 8.7  |
| 2 | 1 | 3.4  |
| 2 | 1 | 3.4  |
| 2 | 1 | 3.4  |
| 2 | 1 | 3.4  |
| 2 | 1 | 3.4  |

|    |    |      |
|----|----|------|
| 2  | 1  | 3.4  |
| 2  | 1  | 3.4  |
| 2  | 2  | 6.2  |
| 1  | 1  | 2.1  |
| 2  | 1  | 1.8  |
| 6  | 4  | 8.5  |
| 3  | 2  | 6.7  |
| 6  | 4  | 13.7 |
| 6  | 4  | 13.4 |
| 10 | 6  | 22.7 |
| 1  | 1  | 5.8  |
| 2  | 1  | 5.8  |
| 2  | 2  | 6.4  |
| 2  | 1  | 2.6  |
| 4  | 4  | 16   |
| 3  | 2  | 9.9  |
| 2  | 1  | 5.8  |
| 9  | 7  | 27.9 |
| 3  | 2  | 8.4  |
| 6  | 4  | 13.4 |
| 7  | 5  | 18   |
| 2  | 2  | 8.1  |
| 10 | 5  | 16.6 |
| 3  | 2  | 10.2 |
| 3  | 2  | 11.1 |
| 1  | 1  | 4    |
| 1  | 1  | 6.2  |
| 1  | 1  | 4.9  |
| 6  | 4  | 19.5 |
| 2  | 1  | 7.4  |
| 2  | 1  | 7.4  |
| 2  | 1  | 7.4  |
| 2  | 1  | 7.4  |
| 2  | 1  | 7.4  |
| 2  | 1  | 7.4  |
| 2  | 1  | 7.4  |
| 2  | 1  | 7.4  |
| 2  | 1  | 7.4  |
| 2  | 1  | 7.4  |
| 2  | 1  | 7.4  |
| 2  | 1  | 7.4  |
| 1  | 1  | 1.7  |
| 3  | 2  | 4.2  |
| 9  | 7  | 10.5 |
| 16 | 11 | 16.2 |
| 3  | 2  | 2.4  |
| 2  | 1  | 1.5  |
| 2  | 1  | 1.7  |
| 1  | 1  | 2.2  |

|    |   |      |
|----|---|------|
| 2  | 1 | 2.2  |
| 3  | 3 | 5.1  |
| 1  | 1 | 1.5  |
| 4  | 1 | 1.4  |
| 1  | 1 | 1.4  |
| 3  | 1 | 1.4  |
| 2  | 1 | 1.4  |
| 2  | 1 | 1    |
| 1  | 1 | 1.4  |
| 2  | 2 | 2.4  |
| 2  | 1 | 1.4  |
| 2  | 1 | 1.4  |
| 2  | 1 | 1.4  |
| 2  | 1 | 1.4  |
| 2  | 1 | 1.4  |
| 1  | 1 | 1.4  |
| 2  | 1 | 6.5  |
| 2  | 1 | 6    |
| 4  | 1 | 6    |
| 6  | 2 | 6.9  |
| 4  | 1 | 6    |
| 1  | 1 | 6    |
| 2  | 1 | 6    |
| 2  | 1 | 6    |
| 2  | 1 | 6    |
| 2  | 1 | 6    |
| 2  | 1 | 6    |
| 2  | 1 | 6    |
| 2  | 1 | 6    |
| 2  | 1 | 6    |
| 2  | 1 | 6    |
| 2  | 2 | 2.4  |
| 2  | 1 | 2.4  |
| 1  | 1 | 2.4  |
| 2  | 1 | 2.4  |
| 2  | 1 | 12.8 |
| 1  | 1 | 12.2 |
| 1  | 1 | 3.5  |
| 1  | 1 | 3.5  |
| 2  | 1 | 0.6  |
| 2  | 1 | 1.7  |
| 4  | 2 | 3.6  |
| 10 | 6 | 10.6 |
| 2  | 1 | 1.4  |
| 1  | 1 | 1.9  |
| 1  | 1 | 1.9  |
| 2  | 1 | 6.4  |
| 1  | 1 | 5.1  |
| 2  | 1 | 5.3  |
| 4  | 2 | 11   |





|    |   |      |
|----|---|------|
| 2  | 1 | 13.3 |
| 5  | 3 | 21.9 |
| 2  | 2 | 8.5  |
| 4  | 2 | 17   |
| 6  | 3 | 21.9 |
| 5  | 3 | 21.9 |
| 6  | 3 | 21.9 |
| 1  | 1 | 6.5  |
| 1  | 1 | 3.4  |
| 3  | 2 | 6.5  |
| 2  | 1 | 3.4  |
| 3  | 2 | 6.5  |
| 1  | 1 | 3.2  |
| 1  | 1 | 3.2  |
| 1  | 1 | 3.2  |
| 2  | 1 | 3.2  |
| 2  | 1 | 3.2  |
| 3  | 1 | 6.8  |
| 3  | 1 | 6.8  |
| 2  | 1 | 6.8  |
| 2  | 1 | 6.8  |
| 2  | 1 | 6.8  |
| 3  | 1 | 6.8  |
| 2  | 1 | 6.8  |
| 1  | 1 | 6.8  |
| 4  | 1 | 6.8  |
| 4  | 1 | 6.8  |
| 3  | 1 | 6.8  |
| 1  | 1 | 6.8  |
| 2  | 1 | 14   |
| 1  | 1 | 14   |
| 1  | 1 | 4.3  |
| 6  | 3 | 15   |
| 4  | 3 | 19.6 |
| 3  | 2 | 14.7 |
| 2  | 2 | 15.3 |
| 6  | 3 | 15   |
| 1  | 1 | 4.3  |
| 2  | 2 | 15.3 |
| 2  | 2 | 9.2  |
| 2  | 1 | 4.3  |
| 2  | 1 | 4.3  |
| 1  | 1 | 2    |
| 16 | 8 | 14.9 |
| 6  | 4 | 8.7  |
| 7  | 6 | 11.7 |
| 1  | 1 | 2    |



|    |    |      |
|----|----|------|
| 15 | 8  | 15.3 |
| 27 | 12 | 21.3 |
| 5  | 3  | 6.3  |
| 2  | 1  | 2.8  |
| 3  | 2  | 4.4  |
| 3  | 2  | 4.5  |
| 1  | 1  | 3.8  |
| 1  | 1  | 2.3  |
| 2  | 2  | 4.1  |
| 4  | 1  | 4.3  |
| 4  | 1  | 4.3  |
| 3  | 1  | 4.3  |
| 2  | 1  | 4.3  |
| 2  | 1  | 2.3  |
| 2  | 1  | 4.4  |
| 1  | 1  | 4.4  |
| 2  | 1  | 4.4  |
| 1  | 1  | 5.2  |
| 2  | 1  | 4.4  |
| 2  | 1  | 5.5  |
| 2  | 1  | 2.7  |
| 1  | 1  | 2.7  |
| 6  | 4  | 8.3  |
| 2  | 2  | 3.9  |
| 2  | 1  | 2.4  |
| 2  | 1  | 3    |
| 4  | 3  | 10.4 |
| 4  | 2  | 6.7  |
| 7  | 4  | 12.2 |
| 4  | 2  | 6.1  |
| 4  | 2  | 4.6  |
| 2  | 1  | 3.7  |
| 2  | 1  | 3    |
| 1  | 1  | 3.7  |
| 3  | 2  | 6.7  |
| 3  | 3  | 10.4 |
| 3  | 2  | 6.7  |
| 2  | 2  | 6.7  |
| 1  | 1  | 2.2  |
| 1  | 1  | 2.4  |
| 1  | 1  | 2.4  |
| 3  | 2  | 4.6  |
| 2  | 1  | 2.4  |
| 2  | 1  | 2.4  |
| 2  | 1  | 6.2  |
| 2  | 1  | 3.1  |
| 1  | 1  | 3.1  |

|   |   |      |
|---|---|------|
| 4 | 3 | 6.2  |
| 3 | 2 | 5    |
| 1 | 1 | 0.7  |
| 2 | 2 | 0.9  |
| 1 | 1 | 0.7  |
| 2 | 1 | 8.1  |
| 3 | 2 | 16.9 |
| 6 | 3 | 26.3 |
| 4 | 2 | 17.5 |
| 3 | 3 | 17.5 |
| 2 | 1 | 8.1  |
| 3 | 1 | 8.1  |
| 1 | 1 | 8.1  |
| 3 | 2 | 17.5 |
| 2 | 1 | 8.1  |
| 2 | 1 | 8.1  |
| 3 | 2 | 16.9 |
| 2 | 1 | 8.1  |
| 2 | 2 | 16.9 |
| 4 | 2 | 16.9 |
| 2 | 1 | 8.1  |
| 3 | 2 | 16.9 |
| 2 | 1 | 1.3  |
| 2 | 1 | 1.3  |
| 1 | 1 | 2.2  |
| 1 | 1 | 1.3  |
| 1 | 1 | 1.3  |
| 2 | 1 | 2.9  |
| 2 | 1 | 2.9  |
| 1 | 1 | 2.9  |
| 1 | 1 | 4.4  |
| 4 | 2 | 8.1  |
| 4 | 2 | 8.1  |
| 1 | 1 | 4.4  |
| 1 | 1 | 4.4  |
| 3 | 2 | 14.7 |
| 2 | 1 | 4.4  |
| 4 | 2 | 8.1  |
| 1 | 1 | 9.2  |
| 2 | 2 | 0.2  |
| 2 | 1 | 6    |
| 1 | 1 | 4.5  |
| 3 | 1 | 4.5  |
| 2 | 2 | 10.5 |
| 2 | 1 | 4.5  |
| 1 | 1 | 6    |
| 2 | 1 | 4.5  |

|    |    |      |
|----|----|------|
| 2  | 1  | 4.5  |
| 2  | 1  | 3    |
| 2  | 1  | 2.8  |
| 23 | 12 | 21.1 |
| 20 | 10 | 20.6 |
| 18 | 9  | 16.7 |
| 7  | 4  | 8.3  |
| 21 | 12 | 29.2 |
| 3  | 1  | 2.8  |
| 2  | 1  | 2.8  |
| 6  | 2  | 6.4  |
| 3  | 2  | 3.5  |
| 11 | 7  | 13.4 |
| 18 | 10 | 18.4 |
| 19 | 10 | 19.6 |
| 12 | 8  | 15.2 |
| 4  | 3  | 5    |
| 2  | 1  | 2.8  |
| 6  | 2  | 4.2  |
| 11 | 6  | 12.1 |
| 14 | 6  | 11.4 |
| 7  | 4  | 8.9  |
| 19 | 11 | 19.9 |
| 1  | 1  | 1.4  |
| 1  | 1  | 1.4  |
| 3  | 2  | 2.3  |
| 3  | 2  | 2.4  |
| 2  | 1  | 1.4  |
| 1  | 1  | 5.8  |
| 1  | 1  | 5.4  |
| 1  | 1  | 3.3  |
| 1  | 1  | 2.3  |
| 2  | 2  | 5.8  |
| 1  | 1  | 3.5  |
| 3  | 2  | 5    |
| 4  | 2  | 5.8  |
| 2  | 2  | 6.2  |
| 1  | 1  | 1.2  |
| 2  | 1  | 2.7  |
| 3  | 2  | 8    |
| 1  | 1  | 7.1  |
| 1  | 1  | 7.1  |
| 2  | 1  | 7.1  |
| 1  | 1  | 7.1  |
| 3  | 2  | 14.2 |
| 4  | 2  | 9.8  |
| 3  | 2  | 13   |

|    |   |      |
|----|---|------|
| 3  | 2 | 9.8  |
| 5  | 3 | 12.7 |
| 1  | 1 | 7.2  |
| 2  | 1 | 3.1  |
| 2  | 1 | 2.8  |
| 4  | 2 | 4.9  |
| 3  | 2 | 4.9  |
| 3  | 2 | 4.9  |
| 12 | 8 | 15.5 |
| 3  | 2 | 4.9  |
| 1  | 1 | 2.1  |
| 2  | 2 | 5.2  |
| 4  | 2 | 3    |
| 1  | 1 | 4.4  |
| 2  | 2 | 3.6  |
| 1  | 1 | 5.8  |
| 2  | 1 | 3.4  |
| 1  | 1 | 5.8  |
| 2  | 1 | 3.4  |
| 5  | 1 | 5.8  |
| 4  | 1 | 5.8  |
| 3  | 1 | 5.8  |
| 2  | 1 | 5.8  |
| 2  | 1 | 0.7  |
| 2  | 1 | 9.7  |
| 2  | 1 | 2.9  |
| 7  | 4 | 10.6 |
| 5  | 3 | 8.8  |
| 5  | 3 | 10.2 |
| 3  | 2 | 5.3  |
| 8  | 5 | 13.7 |
| 2  | 1 | 2.4  |
| 3  | 2 | 7.3  |
| 3  | 2 | 5.9  |
| 1  | 1 | 2.9  |
| 9  | 5 | 16.7 |
| 6  | 4 | 13.1 |
| 2  | 1 | 2.9  |
| 9  | 5 | 15.5 |
| 2  | 2 | 7.3  |
| 3  | 2 | 8.4  |
| 6  | 3 | 10.8 |
| 2  | 1 | 2.9  |
| 6  | 3 | 11   |
| 2  | 1 | 12.5 |
| 4  | 2 | 22.5 |
| 6  | 2 | 22.5 |

|   |   |      |
|---|---|------|
| 4 | 2 | 22.5 |
| 4 | 2 | 22.5 |
| 4 | 2 | 22.5 |
| 3 | 2 | 22.5 |
| 4 | 2 | 22.5 |
| 1 | 1 | 12.5 |
| 1 | 1 | 12.5 |
| 2 | 1 | 12.5 |
| 3 | 2 | 22.5 |
| 2 | 1 | 12.5 |
| 2 | 1 | 12.5 |
| 2 | 1 | 12.5 |
| 1 | 1 | 8.1  |
| 2 | 1 | 8.1  |
| 2 | 1 | 8.1  |
| 2 | 1 | 8.1  |
| 2 | 1 | 2.6  |
| 1 | 1 | 2.6  |
| 2 | 1 | 2.6  |
| 2 | 1 | 2.6  |
| 2 | 1 | 2.6  |
| 2 | 1 | 2.6  |
| 2 | 1 | 2.6  |
| 1 | 1 | 2    |
| 1 | 1 | 2    |
| 1 | 1 | 4.5  |
| 3 | 2 | 8.5  |
| 3 | 2 | 6.6  |
| 3 | 2 | 5.6  |
| 1 | 1 | 2.8  |
| 2 | 1 | 7.4  |
| 1 | 1 | 4.5  |
| 1 | 1 | 2.9  |
| 2 | 1 | 1.6  |
| 7 | 5 | 10.4 |
| 4 | 3 | 6.5  |
| 1 | 1 | 1.8  |
| 3 | 2 | 4.2  |
| 2 | 1 | 2.3  |
| 2 | 1 | 2.3  |
| 1 | 1 | 4.8  |
| 1 | 1 | 4.8  |
| 3 | 2 | 12.4 |
| 1 | 1 | 4.8  |
| 6 | 3 | 19.9 |
| 1 | 1 | 13.9 |
| 2 | 1 | 0.3  |

|   |   |      |
|---|---|------|
| 1 | 1 | 4.7  |
| 2 | 2 | 11.4 |
| 1 | 1 | 6.7  |
| 1 | 1 | 4.7  |
| 1 | 1 | 4.7  |
| 2 | 1 | 3.7  |
| 4 | 3 | 9.4  |
| 2 | 2 | 8.4  |
| 9 | 6 | 18.8 |
| 2 | 1 | 3.7  |
| 2 | 1 | 3.7  |
| 1 | 1 | 6.3  |
| 2 | 1 | 6.3  |
| 1 | 1 | 2.7  |
| 2 | 2 | 10   |
| 3 | 2 | 5.5  |
| 1 | 1 | 3.5  |
| 2 | 1 | 2.4  |
| 1 | 1 | 2.6  |
| 2 | 1 | 13.7 |
| 1 | 1 | 2.8  |
| 1 | 1 | 2.8  |
| 2 | 1 | 1.8  |
| 1 | 1 | 2    |
| 2 | 1 | 2.4  |
| 1 | 1 | 3.6  |
| 2 | 1 | 3.1  |
| 2 | 1 | 14.9 |
| 1 | 1 | 8.1  |
| 2 | 1 | 14.9 |
| 2 | 1 | 10.4 |
| 2 | 1 | 10.4 |
| 1 | 1 | 4.2  |
| 1 | 1 | 4.2  |
| 1 | 1 | 10.4 |
| 1 | 1 | 8.8  |
| 2 | 1 | 5.7  |
| 2 | 1 | 6.9  |
| 2 | 1 | 6.9  |
| 1 | 1 | 6.9  |
| 3 | 1 | 6.9  |
| 2 | 1 | 6.9  |
| 2 | 1 | 6.9  |
| 2 | 1 | 6.9  |
| 2 | 1 | 3.1  |
| 1 | 1 | 3.1  |
| 1 | 1 | 3.1  |

|   |   |      |
|---|---|------|
| 2 | 1 | 2.7  |
| 2 | 2 | 2.8  |
| 1 | 1 | 1.1  |
| 2 | 1 | 2.4  |
| 2 | 1 | 1.7  |
| 2 | 2 | 2.4  |
| 2 | 1 | 5.4  |
| 3 | 2 | 10.5 |
| 6 | 4 | 14.4 |
| 1 | 1 | 5.4  |
| 2 | 1 | 5.4  |
| 2 | 1 | 5.4  |
| 2 | 1 | 5.4  |
| 2 | 1 | 5.5  |
| 5 | 4 | 16.8 |
| 6 | 4 | 16   |
| 4 | 2 | 6.5  |
| 2 | 1 | 3.1  |
| 4 | 2 | 7.3  |
| 7 | 4 | 17.5 |
| 7 | 4 | 14.4 |
| 3 | 2 | 6.5  |
| 3 | 2 | 5.8  |
| 2 | 2 | 10.5 |
| 3 | 2 | 5.8  |
| 4 | 2 | 8.9  |
| 3 | 3 | 12.3 |
| 2 | 2 | 6.8  |
| 4 | 2 | 9.7  |
| 2 | 2 | 7.3  |
| 5 | 3 | 11.3 |
| 1 | 1 | 2.1  |
| 2 | 2 | 2.9  |
| 2 | 1 | 2.9  |
| 1 | 1 | 4.2  |
| 2 | 2 | 7.2  |
| 2 | 1 | 4.2  |
| 1 | 1 | 2.9  |
| 1 | 1 | 4.2  |
| 1 | 1 | 3.4  |
| 1 | 1 | 1.7  |
| 3 | 2 | 3.8  |
| 1 | 1 | 1.6  |
| 2 | 1 | 2.8  |
| 1 | 1 | 4.3  |
| 2 | 1 | 6.5  |
| 1 | 1 | 6.5  |

|   |   |      |
|---|---|------|
| 1 | 1 | 6.5  |
| 1 | 1 | 6.5  |
| 2 | 1 | 6.5  |
| 2 | 1 | 6.5  |
| 1 | 1 | 1.1  |
| 1 | 1 | 1.7  |
| 1 | 1 | 1.7  |
| 2 | 1 | 2.3  |
| 2 | 1 | 2.3  |
| 2 | 1 | 2.3  |
| 3 | 1 | 2.3  |
| 2 | 1 | 3.6  |
| 1 | 1 | 2.5  |
| 1 | 1 | 2.3  |
| 1 | 1 | 1.5  |
| 1 | 1 | 8.8  |
| 2 | 1 | 8.8  |
| 1 | 1 | 2.5  |
| 1 | 1 | 7.8  |
| 2 | 1 | 4.5  |
| 2 | 1 | 1.9  |
| 2 | 1 | 1.9  |
| 1 | 1 | 1.1  |
| 3 | 2 | 2.4  |
| 6 | 4 | 3.9  |
| 9 | 5 | 5.1  |
| 5 | 3 | 3.3  |
| 3 | 2 | 1.4  |
| 1 | 1 | 0.5  |
| 4 | 2 | 2.2  |
| 4 | 3 | 3    |
| 1 | 1 | 12.7 |
| 1 | 1 | 11.7 |
| 1 | 1 | 1.1  |
| 1 | 1 | 2.9  |
| 2 | 1 | 10.3 |
| 3 | 2 | 13.2 |
| 1 | 1 | 1.1  |
| 1 | 1 | 9.3  |
| 2 | 1 | 9.3  |
| 2 | 1 | 9.3  |
| 2 | 2 | 10.8 |
| 4 | 3 | 21.1 |
| 3 | 2 | 16.5 |
| 1 | 1 | 1.6  |
| 2 | 1 | 6.1  |
| 2 | 2 | 9.3  |



|   |   |      |
|---|---|------|
| 2 | 2 | 9.3  |
| 2 | 2 | 9.3  |
| 2 | 1 | 6.1  |
| 2 | 2 | 13.6 |
| 1 | 1 | 6.1  |
| 2 | 1 | 6.1  |
| 1 | 1 | 3.9  |
| 1 | 1 | 3.9  |
| 1 | 1 | 1.1  |
| 3 | 2 | 4.1  |
| 5 | 3 | 4.1  |
| 2 | 2 | 4.1  |
| 2 | 1 | 1.3  |
| 5 | 4 | 4.9  |
| 1 | 1 | 1.3  |
| 1 | 1 | 14   |
| 1 | 1 | 14   |
| 2 | 1 | 14   |
| 1 | 1 | 14   |
| 1 | 1 | 1.8  |
| 1 | 1 | 1.8  |
| 2 | 2 | 3.1  |
| 2 | 2 | 3.2  |
| 2 | 1 | 2.4  |
| 2 | 1 | 2.4  |
| 1 | 1 | 3.6  |
| 2 | 1 | 3.6  |
| 1 | 1 | 2.3  |
| 3 | 3 | 8.3  |
| 3 | 3 | 12.4 |
| 5 | 3 | 10.9 |
| 3 | 2 | 6.2  |
| 2 | 1 | 2.3  |
| 2 | 1 | 2.3  |
| 1 | 1 | 4.7  |
| 1 | 1 | 3.9  |
| 3 | 2 | 6.7  |
| 3 | 2 | 8.5  |
| 5 | 3 | 10.9 |
| 5 | 3 | 10.9 |
| 4 | 2 | 8.5  |
| 1 | 1 | 3.2  |
| 1 | 1 | 0.3  |
| 1 | 1 | 0.2  |
| 1 | 1 | 1.1  |
| 2 | 1 | 1.1  |
| 1 | 1 | 1.1  |

|    |    |      |
|----|----|------|
| 2  | 2  | 1.9  |
| 2  | 1  | 1.1  |
| 2  | 2  | 3.7  |
| 2  | 1  | 2.9  |
| 2  | 1  | 2.9  |
| 3  | 2  | 5.5  |
| 1  | 1  | 10.7 |
| 2  | 2  | 27.5 |
| 6  | 3  | 33.6 |
| 3  | 2  | 27.5 |
| 6  | 2  | 32.1 |
| 4  | 1  | 16.8 |
| 3  | 1  | 16.8 |
| 2  | 1  | 10.7 |
| 1  | 1  | 10.7 |
| 2  | 1  | 10.7 |
| 1  | 1  | 16.8 |
| 3  | 2  | 17.6 |
| 7  | 2  | 17.6 |
| 6  | 1  | 16.8 |
| 5  | 2  | 27.5 |
| 1  | 1  | 1.8  |
| 2  | 1  | 1.6  |
| 1  | 1  | 3    |
| 1  | 1  | 3    |
| 1  | 1  | 3    |
| 1  | 1  | 4.1  |
| 6  | 3  | 10   |
| 2  | 1  | 4.1  |
| 2  | 1  | 1.1  |
| 7  | 5  | 4.5  |
| 4  | 3  | 3.4  |
| 4  | 3  | 3.8  |
| 7  | 5  | 5.1  |
| 15 | 10 | 9.6  |
| 3  | 3  | 2.4  |
| 2  | 2  | 1.8  |
| 6  | 4  | 3.5  |
| 2  | 2  | 1.8  |
| 3  | 3  | 2.5  |
| 3  | 3  | 2.9  |
| 6  | 4  | 3.2  |
| 1  | 1  | 1.1  |
| 1  | 1  | 1.3  |
| 1  | 1  | 2.6  |
| 1  | 1  | 2.4  |
| 2  | 1  | 2.4  |

|   |   |      |
|---|---|------|
| 1 | 1 | 7.4  |
| 3 | 2 | 14.2 |
| 5 | 2 | 14.2 |
| 3 | 2 | 14.2 |
| 2 | 2 | 14.2 |
| 3 | 2 | 14.2 |
| 4 | 2 | 14.2 |
| 2 | 1 | 6.8  |
| 3 | 2 | 14.2 |
| 3 | 2 | 14.2 |
| 4 | 2 | 14.2 |
| 4 | 2 | 14.2 |
| 4 | 2 | 14.2 |
| 2 | 1 | 6.8  |
| 1 | 1 | 0.7  |
| 1 | 1 | 0.7  |
| 1 | 1 | 2.4  |
| 3 | 2 | 8.1  |
| 2 | 1 | 5.7  |
| 2 | 1 | 5.7  |
| 1 | 1 | 5.7  |
| 1 | 1 | 5.7  |
| 1 | 1 | 2.1  |
| 2 | 1 | 2.8  |
| 2 | 1 | 2.8  |
| 2 | 1 | 2.8  |
| 2 | 1 | 2.8  |
| 2 | 1 | 2.8  |
| 1 | 1 | 2.7  |
| 1 | 1 | 0.5  |
| 1 | 1 | 3.2  |
| 3 | 2 | 5.7  |
| 1 | 1 | 3.2  |
| 1 | 1 | 3.2  |
| 6 | 4 | 13.2 |
| 2 | 1 | 3.2  |
| 2 | 1 | 3.2  |
| 3 | 2 | 6.2  |
| 1 | 1 | 3.2  |
| 2 | 1 | 3.2  |
| 2 | 1 | 3.2  |
| 1 | 1 | 3.1  |
| 1 | 1 | 2.2  |
| 1 | 1 | 2    |
| 2 | 1 | 1.6  |
| 1 | 1 | 1.6  |
| 4 | 1 | 1.6  |

|    |   |      |
|----|---|------|
| 1  | 1 | 9.3  |
| 1  | 1 | 9.3  |
| 1  | 1 | 9.3  |
| 2  | 1 | 9.3  |
| 2  | 1 | 8.4  |
| 1  | 1 | 0.8  |
| 1  | 1 | 5.2  |
| 11 | 5 | 18.7 |
| 11 | 4 | 16   |
| 3  | 2 | 6.8  |
| 2  | 1 | 4.2  |
| 10 | 5 | 16.5 |
| 4  | 2 | 9.2  |
| 5  | 4 | 15.7 |
| 2  | 1 | 4    |
| 5  | 3 | 12   |
| 3  | 3 | 10.8 |
| 1  | 1 | 4    |
| 6  | 3 | 12.6 |
| 7  | 3 | 11.5 |
| 3  | 2 | 7.8  |
| 2  | 1 | 1.7  |
| 1  | 1 | 3    |
| 2  | 1 | 2.1  |
| 1  | 1 | 3    |
| 2  | 2 | 5.1  |
| 3  | 2 | 4.3  |
| 1  | 1 | 4.6  |
| 3  | 2 | 9.9  |
| 2  | 2 | 8.1  |
| 1  | 1 | 4.6  |
| 1  | 1 | 4.6  |
| 1  | 1 | 4.6  |
| 4  | 1 | 4.6  |
| 3  | 1 | 4.6  |
| 4  | 3 | 12.3 |
| 1  | 1 | 1    |
| 6  | 3 | 3.9  |
| 4  | 2 | 2.2  |
| 1  | 1 | 1.6  |
| 1  | 1 | 1.7  |
| 1  | 1 | 1.1  |
| 1  | 1 | 1.1  |
| 1  | 1 | 4.2  |
| 3  | 2 | 9    |
| 1  | 1 | 4.2  |
| 1  | 1 | 4.2  |

|    |   |      |
|----|---|------|
| 2  | 2 | 9    |
| 2  | 1 | 6.1  |
| 1  | 1 | 1.4  |
| 2  | 1 | 1.4  |
| 1  | 1 | 1.6  |
| 1  | 1 | 1.5  |
| 2  | 1 | 2    |
| 3  | 2 | 3.1  |
| 3  | 1 | 0.4  |
| 1  | 1 | 1.4  |
| 10 | 6 | 6.8  |
| 4  | 2 | 2    |
| 3  | 3 | 3.6  |
| 6  | 4 | 4.5  |
| 1  | 1 | 0.8  |
| 2  | 1 | 0.9  |
| 1  | 1 | 1    |
| 2  | 1 | 1.1  |
| 3  | 2 | 2    |
| 5  | 3 | 3.4  |
| 1  | 1 | 1    |
| 1  | 1 | 1.4  |
| 3  | 2 | 2.6  |
| 2  | 2 | 1.6  |
| 7  | 5 | 5.8  |
| 1  | 1 | 0.8  |
| 3  | 2 | 2.2  |
| 3  | 2 | 4.3  |
| 2  | 1 | 1.5  |
| 2  | 2 | 2.5  |
| 1  | 1 | 2    |
| 4  | 3 | 4.8  |
| 4  | 3 | 3.7  |
| 1  | 1 | 0.5  |
| 1  | 1 | 0.6  |
| 1  | 1 | 1.4  |
| 1  | 1 | 7.9  |
| 3  | 2 | 17.6 |
| 2  | 1 | 9.7  |
| 1  | 1 | 9.7  |
| 1  | 1 | 9.7  |
| 1  | 1 | 5.1  |
| 4  | 3 | 8.1  |
| 2  | 1 | 3    |
| 1  | 1 | 3.8  |
| 1  | 1 | 5.1  |
| 2  | 2 | 8.9  |

|    |   |      |
|----|---|------|
| 3  | 2 | 8.7  |
| 1  | 1 | 1    |
| 1  | 1 | 2.5  |
| 1  | 1 | 0.7  |
| 1  | 1 | 1    |
| 1  | 1 | 1.7  |
| 3  | 2 | 3.1  |
| 5  | 3 | 4.6  |
| 6  | 4 | 5.3  |
| 3  | 2 | 2.8  |
| 3  | 2 | 3.6  |
| 1  | 1 | 0.3  |
| 1  | 1 | 7.4  |
| 1  | 1 | 0.6  |
| 1  | 1 | 0.5  |
| 1  | 1 | 1    |
| 1  | 1 | 0.7  |
| 3  | 2 | 1.4  |
| 1  | 1 | 0.7  |
| 1  | 1 | 0.7  |
| 1  | 1 | 0.7  |
| 1  | 1 | 0.7  |
| 1  | 1 | 1.2  |
| 1  | 1 | 2.2  |
| 3  | 2 | 3.1  |
| 2  | 1 | 2.2  |
| 3  | 2 | 3.1  |
| 1  | 1 | 0.8  |
| 15 | 7 | 26.6 |
| 13 | 5 | 18.4 |
| 15 | 7 | 26.6 |
| 15 | 6 | 23.4 |
| 8  | 5 | 17.6 |
| 4  | 3 | 8.8  |
| 14 | 7 | 26.6 |
| 11 | 6 | 21   |
| 10 | 5 | 16.2 |
| 11 | 6 | 21   |
| 12 | 5 | 10.8 |
| 7  | 4 | 9    |
| 4  | 3 | 5.5  |
| 6  | 2 | 5.6  |
| 2  | 1 | 1.7  |
| 1  | 1 | 1.7  |
| 1  | 1 | 1.7  |
| 1  | 1 | 1.7  |
| 3  | 2 | 3.4  |

|    |   |      |
|----|---|------|
| 1  | 1 | 1.8  |
| 1  | 1 | 1.8  |
| 9  | 6 | 12.5 |
| 7  | 4 | 8.3  |
| 1  | 1 | 2.4  |
| 4  | 2 | 4.1  |
| 1  | 1 | 1.7  |
| 1  | 1 | 1.7  |
| 7  | 4 | 18.9 |
| 5  | 3 | 15.3 |
| 6  | 3 | 19.3 |
| 1  | 1 | 5.6  |
| 2  | 2 | 10.4 |
| 3  | 2 | 10.4 |
| 5  | 3 | 19.3 |
| 5  | 3 | 14.1 |
| 3  | 2 | 14.5 |
| 1  | 1 | 3.6  |
| 2  | 2 | 16.1 |
| 4  | 4 | 17.7 |
| 4  | 2 | 10.4 |
| 8  | 5 | 28.9 |
| 6  | 4 | 20.1 |
| 10 | 2 | 12.3 |
| 10 | 1 | 9    |
| 6  | 1 | 11.7 |
| 6  | 1 | 11.5 |
| 7  | 4 | 8.5  |
| 1  | 1 | 2.4  |
| 9  | 4 | 10.3 |
| 2  | 1 | 1.7  |
| 1  | 1 | 1.7  |
| 3  | 2 | 4.1  |
| 1  | 1 | 2.4  |
| 2  | 1 | 1.7  |
| 4  | 2 | 5    |
| 4  | 2 | 5    |
| 2  | 1 | 1.7  |
| 3  | 2 | 3.4  |
| 8  | 3 | 30.9 |
| 6  | 3 | 30.9 |
| 6  | 3 | 30.9 |
| 10 | 4 | 31.8 |
| 3  | 2 | 23.6 |
| 9  | 3 | 30.9 |
| 3  | 3 | 30.9 |
| 3  | 2 | 21.8 |

|   |   |      |
|---|---|------|
| 4 | 2 | 23.6 |
| 9 | 3 | 30.9 |
| 4 | 2 | 23.6 |
| 2 | 1 | 9.1  |
| 2 | 1 | 9.1  |
| 5 | 2 | 23.6 |
| 4 | 3 | 30.9 |
| 6 | 3 | 30.9 |
| 3 | 2 | 23.6 |
| 3 | 1 | 4.8  |
| 4 | 1 | 3.8  |
| 3 | 1 | 3.8  |
| 3 | 1 | 3.8  |
| 4 | 1 | 4.7  |
| 2 | 1 | 3.1  |
| 2 | 1 | 3.1  |
| 2 | 1 | 3.1  |
| 2 | 1 | 3.1  |
| 1 | 1 | 3.1  |
| 4 | 1 | 4.7  |
| 2 | 1 | 8.8  |
| 1 | 1 | 8.8  |
| 1 | 1 | 8.8  |
| 2 | 1 | 8.8  |
| 1 | 1 | 8.8  |
| 1 | 1 | 8.8  |
| 5 | 3 | 5    |
| 3 | 2 | 3.5  |
| 3 | 2 | 3.5  |
| 6 | 4 | 7.6  |
| 2 | 1 | 1.5  |
| 2 | 1 | 2    |
| 1 | 1 | 1.5  |
| 2 | 1 | 1.5  |
| 3 | 2 | 3.5  |
| 4 | 2 | 3.5  |
| 4 | 3 | 4.9  |
| 2 | 1 | 1.5  |
| 4 | 2 | 3.5  |
| 5 | 3 | 11.4 |
| 1 | 1 | 4    |
| 1 | 1 | 3.5  |
| 1 | 1 | 3.5  |
| 1 | 1 | 4    |
| 4 | 2 | 8.7  |
| 3 | 3 | 17.3 |
| 7 | 5 | 25.2 |



|   |   |      |
|---|---|------|
| 6 | 4 | 18   |
| 2 | 1 | 7.5  |
| 3 | 2 | 9.8  |
| 4 | 3 | 17.3 |
| 2 | 2 | 9.8  |
| 2 | 1 | 7.5  |
| 5 | 4 | 21.4 |
| 3 | 2 | 13.5 |
| 1 | 1 | 7.5  |
| 6 | 4 | 21.4 |
| 3 | 2 | 10.9 |
| 3 | 2 | 13.2 |
| 2 | 1 | 5.4  |
| 7 | 3 | 18.6 |
| 3 | 2 | 10.9 |
| 2 | 1 | 7.8  |
| 2 | 1 | 5.4  |
| 2 | 2 | 10.9 |
| 1 | 1 | 5.4  |
| 2 | 1 | 5.4  |
| 1 | 1 | 5.4  |
| 2 | 1 | 5.4  |
| 5 | 3 | 6.5  |
| 2 | 1 | 2.5  |
| 1 | 1 | 2.5  |
| 6 | 2 | 14.9 |
| 2 | 1 | 8.5  |
| 5 | 2 | 14.9 |
| 1 | 1 | 8.5  |
| 3 | 2 | 14.9 |
| 2 | 1 | 8.5  |
| 7 | 3 | 21.3 |
| 2 | 1 | 8.5  |
| 4 | 2 | 14.9 |
| 4 | 2 | 14.9 |
| 2 | 1 | 8.5  |
| 7 | 4 | 26.4 |
| 5 | 2 | 16.2 |
| 5 | 3 | 25.2 |
| 3 | 2 | 15.6 |
| 3 | 2 | 16.3 |
| 6 | 2 | 16.3 |
| 4 | 3 | 25.2 |
| 3 | 2 | 16.3 |
| 3 | 2 | 16.3 |
| 4 | 2 | 16.3 |
| 4 | 2 | 16.3 |

|    |   |      |
|----|---|------|
| 4  | 2 | 20.6 |
| 4  | 3 | 23.7 |
| 3  | 2 | 12.9 |
| 1  | 1 | 4.6  |
| 4  | 3 | 25.3 |
| 7  | 3 | 31.4 |
| 2  | 1 | 7.7  |
| 4  | 4 | 35.6 |
| 1  | 1 | 12.4 |
| 3  | 2 | 12.9 |
| 3  | 2 | 12.4 |
| 4  | 2 | 10.3 |
| 5  | 3 | 15.5 |
| 5  | 3 | 15.2 |
| 3  | 3 | 9.5  |
| 2  | 2 | 6.8  |
| 2  | 1 | 3.7  |
| 2  | 1 | 3    |
| 3  | 2 | 6.8  |
| 4  | 2 | 13.5 |
| 6  | 3 | 16.3 |
| 4  | 2 | 13.5 |
| 12 | 5 | 31.2 |
| 11 | 5 | 31.2 |
| 2  | 1 | 7.2  |
| 3  | 2 | 12.5 |
| 2  | 1 | 6.3  |
| 4  | 3 | 20.7 |
| 6  | 3 | 17.8 |
| 4  | 3 | 20.7 |
| 4  | 3 | 19.7 |
| 6  | 3 | 26.9 |
| 3  | 3 | 19.7 |
| 7  | 4 | 24   |
| 4  | 3 | 17.9 |
| 5  | 3 | 17.9 |
| 12 | 3 | 17.9 |
| 5  | 3 | 17.9 |
| 2  | 2 | 12.2 |
| 3  | 2 | 12.2 |
| 3  | 2 | 12.2 |
| 2  | 1 | 5.8  |
| 2  | 1 | 5.8  |
| 2  | 1 | 5.8  |
| 2  | 1 | 5.8  |
| 4  | 3 | 8.2  |
| 5  | 3 | 11.5 |

|    |   |      |
|----|---|------|
| 2  | 2 | 9.4  |
| 2  | 1 | 4.6  |
| 4  | 2 | 9.4  |
| 1  | 1 | 4.6  |
| 2  | 2 | 9.4  |
| 1  | 1 | 4.6  |
| 2  | 1 | 4.6  |
| 2  | 2 | 6.5  |
| 5  | 3 | 19.6 |
| 2  | 1 | 10.3 |
| 4  | 2 | 17.5 |
| 3  | 2 | 14.9 |
| 2  | 1 | 10.3 |
| 2  | 1 | 11.3 |
| 2  | 2 | 15.5 |
| 1  | 1 | 11.3 |
| 2  | 1 | 10.3 |
| 5  | 2 | 17.5 |
| 2  | 1 | 10.3 |
| 3  | 1 | 10.3 |
| 4  | 1 | 10.3 |
| 4  | 1 | 10.3 |
| 3  | 2 | 13.4 |
| 12 | 5 | 26.8 |
| 2  | 1 | 7.9  |
| 2  | 2 | 15   |
| 3  | 2 | 13.4 |
| 9  | 3 | 19.7 |
| 4  | 2 | 14.2 |
| 4  | 3 | 18.1 |
| 1  | 1 | 7.9  |
| 2  | 2 | 10.2 |
| 3  | 2 | 9.8  |
| 3  | 2 | 11.8 |
| 4  | 2 | 9.1  |
| 4  | 2 | 11.9 |
| 3  | 2 | 13.8 |
| 4  | 3 | 15   |
| 1  | 1 | 5.5  |
| 5  | 2 | 11.9 |
| 4  | 2 | 11.9 |
| 6  | 3 | 15.8 |
| 2  | 1 | 5.5  |
| 1  | 1 | 8.3  |
| 2  | 2 | 13.8 |
| 7  | 4 | 23.3 |
| 4  | 3 | 20.2 |

|   |   |      |
|---|---|------|
| 4 | 2 | 21.1 |
| 3 | 2 | 21.1 |
| 1 | 1 | 10.6 |
| 2 | 2 | 21.1 |
| 3 | 2 | 21.1 |
| 1 | 1 | 10.6 |
| 2 | 2 | 4    |
| 3 | 2 | 13.4 |
| 2 | 1 | 7.4  |
| 3 | 2 | 22.1 |
| 1 | 1 | 14.8 |
| 2 | 1 | 14.8 |
| 1 | 1 | 7.4  |
| 2 | 1 | 14.8 |
| 1 | 1 | 7.4  |
| 1 | 1 | 14.8 |
| 1 | 1 | 14.8 |
| 3 | 1 | 3.8  |
| 4 | 1 | 2.4  |
| 4 | 1 | 2.4  |
| 5 | 1 | 4    |
| 4 | 1 | 2.4  |
| 4 | 1 | 1.1  |
| 2 | 1 | 1.1  |
| 4 | 1 | 3.8  |
| 3 | 2 | 8.9  |
| 1 | 1 | 4.1  |
| 1 | 1 | 4.7  |
| 4 | 2 | 22.9 |
| 2 | 1 | 9.8  |
| 2 | 2 | 7.8  |
| 2 | 1 | 3.9  |
| 3 | 2 | 7.8  |
| 5 | 4 | 17.3 |
| 3 | 2 | 9    |
| 3 | 2 | 7.8  |
| 2 | 1 | 5.1  |
| 1 | 1 | 3.9  |
| 3 | 2 | 7.8  |
| 5 | 3 | 14.1 |
| 2 | 2 | 7.6  |
| 2 | 2 | 9.5  |
| 2 | 1 | 4.8  |
| 1 | 1 | 4.8  |
| 4 | 2 | 9.5  |
| 3 | 2 | 12.8 |
| 2 | 1 | 7.9  |

|   |   |      |
|---|---|------|
| 2 | 1 | 7.9  |
| 2 | 1 | 7.9  |
| 2 | 1 | 7.9  |
| 6 | 2 | 19.5 |
| 6 | 3 | 26.6 |
| 4 | 3 | 26.6 |
| 4 | 1 | 12.5 |
| 5 | 3 | 26.6 |
| 4 | 3 | 26.6 |
| 2 | 1 | 12.5 |
| 3 | 2 | 5.1  |
| 1 | 1 | 2.1  |
| 1 | 1 | 1.9  |
| 3 | 2 | 5.4  |
| 1 | 1 | 3    |
| 3 | 2 | 4.8  |
| 1 | 1 | 3    |
| 1 | 1 | 3    |
| 2 | 1 | 3    |
| 1 | 1 | 3    |
| 2 | 1 | 3    |
| 1 | 1 | 3    |
| 1 | 1 | 3    |
| 1 | 1 | 3    |
| 1 | 1 | 3    |
| 2 | 2 | 17   |
| 8 | 4 | 30.9 |
| 2 | 1 | 5.5  |
| 4 | 2 | 14.5 |
| 6 | 2 | 20.6 |
| 3 | 1 | 9.1  |
| 2 | 1 | 9.1  |
| 2 | 2 | 13.9 |
| 2 | 1 | 11.5 |
| 2 | 1 | 11.5 |
| 2 | 2 | 14.5 |
| 4 | 3 | 26.1 |
| 5 | 2 | 20.6 |
| 2 | 1 | 11.5 |
| 5 | 3 | 26.1 |
| 2 | 2 | 8.5  |
| 5 | 2 | 8.2  |
| 2 | 1 | 4.1  |
| 3 | 1 | 3.6  |
| 3 | 2 | 19.9 |
| 2 | 1 | 7.5  |
| 4 | 1 | 7.5  |

|    |   |      |
|----|---|------|
| 2  | 1 | 7.5  |
| 4  | 2 | 19.9 |
| 2  | 1 | 12.4 |
| 2  | 1 | 7.5  |
| 2  | 1 | 12.4 |
| 4  | 1 | 12.4 |
| 1  | 1 | 12.4 |
| 2  | 1 | 7.5  |
| 2  | 1 | 7.5  |
| 6  | 2 | 19.9 |
| 4  | 3 | 23.9 |
| 3  | 2 | 10.3 |
| 5  | 3 | 18   |
| 3  | 3 | 18   |
| 14 | 5 | 24.1 |
| 7  | 5 | 21.1 |
| 4  | 2 | 6.1  |
| 2  | 2 | 14.2 |
| 7  | 4 | 18.4 |
| 2  | 1 | 6.5  |
| 3  | 2 | 14.2 |
| 3  | 2 | 10.3 |
| 1  | 1 | 6.5  |
| 5  | 1 | 12.3 |
| 1  | 1 | 12.3 |
| 2  | 1 | 12.3 |
| 3  | 1 | 12.3 |
| 2  | 1 | 12.3 |
| 2  | 1 | 12.3 |
| 1  | 1 | 12.3 |
| 2  | 1 | 12.3 |
| 2  | 1 | 12.3 |
| 2  | 1 | 12.1 |
| 2  | 1 | 12.1 |
| 2  | 1 | 8.4  |
| 2  | 1 | 8.4  |
| 2  | 1 | 5.3  |
| 2  | 2 | 64.6 |
| 1  | 1 | 27.8 |
| 2  | 1 | 27.8 |
| 1  | 1 | 27.8 |
| 1  | 1 | 27.8 |
| 2  | 1 | 27.8 |
| 2  | 1 | 27.8 |
| 2  | 1 | 27.8 |
| 1  | 1 | 4.1  |
| 1  | 1 | 5.4  |

|   |   |      |
|---|---|------|
| 6 | 3 | 15.9 |
| 3 | 2 | 8.5  |
| 3 | 2 | 5.8  |
| 4 | 2 | 6.2  |
| 2 | 1 | 3.3  |
| 1 | 1 | 3.3  |
| 1 | 1 | 2.9  |
| 1 | 1 | 2.9  |
| 1 | 1 | 3.3  |
| 1 | 1 | 3.3  |
| 2 | 1 | 3.3  |
| 3 | 1 | 3.3  |
| 2 | 1 | 3.3  |
| 2 | 2 | 6.2  |
| 2 | 1 | 8.8  |
| 2 | 1 | 8.8  |
| 1 | 1 | 8.8  |
| 5 | 2 | 16.1 |
| 1 | 1 | 7.3  |
| 2 | 1 | 8.8  |
| 2 | 1 | 8.8  |
| 1 | 1 | 7.3  |
| 2 | 1 | 8.8  |
| 2 | 1 | 8.8  |
| 1 | 1 | 8.8  |
| 4 | 2 | 16.1 |
| 2 | 1 | 6.7  |
| 2 | 1 | 6.7  |
| 2 | 2 | 16   |
| 2 | 1 | 6.7  |
| 4 | 2 | 16   |
| 1 | 1 | 6.7  |
| 1 | 1 | 6.7  |
| 2 | 1 | 6.7  |
| 2 | 2 | 11.5 |
| 3 | 2 | 11.5 |
| 4 | 3 | 18.6 |
| 2 | 2 | 11.9 |
| 5 | 3 | 18.6 |
| 5 | 3 | 20.1 |
| 3 | 2 | 8.9  |
| 2 | 1 | 3.7  |
| 2 | 2 | 9.8  |
| 5 | 3 | 12.2 |
| 9 | 4 | 16.3 |
| 1 | 1 | 3.7  |
| 3 | 2 | 7.7  |

|   |   |      |
|---|---|------|
| 2 | 2 | 7.7  |
| 4 | 2 | 6.5  |
| 4 | 3 | 13   |
| 3 | 2 | 7.7  |
| 1 | 1 | 3.7  |
| 2 | 1 | 8.4  |
| 3 | 2 | 12.8 |
| 2 | 1 | 8.4  |
| 3 | 1 | 8.4  |
| 5 | 2 | 12.8 |
| 2 | 1 | 8.4  |
| 1 | 1 | 8.4  |
| 2 | 1 | 8.4  |
| 2 | 1 | 8.4  |
| 1 | 1 | 8.4  |
| 1 | 1 | 5.4  |
| 1 | 1 | 5.4  |
| 1 | 1 | 5.4  |
| 2 | 1 | 5.4  |
| 3 | 2 | 9.6  |
| 6 | 3 | 12.5 |
| 2 | 1 | 4.3  |
| 2 | 2 | 9.6  |
| 2 | 1 | 4.3  |
| 2 | 1 | 5.3  |
| 1 | 1 | 5.3  |
| 4 | 3 | 12.5 |
| 3 | 2 | 8.9  |
| 1 | 1 | 10   |
| 7 | 4 | 15.7 |
| 2 | 2 | 9.6  |
| 1 | 1 | 4.3  |
| 3 | 2 | 14.2 |
| 2 | 1 | 8.1  |
| 3 | 2 | 12.8 |
| 4 | 1 | 8.1  |
| 1 | 1 | 8.1  |
| 3 | 1 | 8.1  |
| 4 | 2 | 12.8 |
| 1 | 1 | 8.1  |
| 5 | 2 | 12.8 |
| 2 | 1 | 8.1  |
| 2 | 1 | 8.1  |
| 2 | 1 | 8.1  |
| 4 | 1 | 8.1  |
| 1 | 1 | 10.7 |
| 2 | 1 | 10.7 |



|   |   |      |
|---|---|------|
| 4 | 2 | 17.9 |
| 1 | 1 | 8.1  |
| 2 | 1 | 8.1  |
| 1 | 1 | 8.1  |
| 2 | 1 | 8.1  |
| 1 | 1 | 8.1  |
| 4 | 1 | 12.6 |
| 5 | 1 | 12.6 |
| 3 | 1 | 12.6 |
| 5 | 3 | 26.1 |
| 4 | 1 | 12.6 |
| 3 | 1 | 18   |
| 4 | 1 | 12.6 |
| 2 | 1 | 12.6 |
| 3 | 3 | 25.2 |
| 2 | 1 | 12.6 |
| 2 | 1 | 12.6 |
| 2 | 1 | 12.6 |
| 2 | 2 | 5.1  |
| 1 | 1 | 2.2  |
| 1 | 1 | 2.2  |
| 1 | 1 | 3.7  |
| 3 | 2 | 6.6  |
| 2 | 1 | 3.5  |
| 1 | 1 | 3.5  |
| 1 | 1 | 3.5  |
| 1 | 1 | 3.5  |
| 2 | 1 | 5.5  |
| 1 | 1 | 5.5  |
| 2 | 1 | 5.5  |
| 1 | 1 | 5.5  |
| 1 | 1 | 1.5  |
| 2 | 1 | 9.9  |
| 2 | 1 | 9.9  |
| 1 | 1 | 3    |
| 1 | 1 | 2.4  |
| 1 | 1 | 2.7  |
| 2 | 1 | 3.8  |
| 1 | 1 | 3.8  |
| 2 | 2 | 7.3  |
| 2 | 1 | 3.8  |
| 1 | 1 | 3.5  |
| 2 | 1 | 3.8  |
| 2 | 2 | 7.3  |
| 1 | 1 | 3.8  |
| 1 | 1 | 3.8  |
| 1 | 1 | 6.1  |

|   |   |      |
|---|---|------|
| 4 | 2 | 12.2 |
| 3 | 2 | 12.2 |
| 1 | 1 | 6.1  |
| 1 | 1 | 6.1  |
| 1 | 1 | 1.6  |
| 1 | 1 | 1.6  |
| 1 | 1 | 1.6  |
| 2 | 1 | 1.6  |
| 1 | 1 | 1.6  |
| 2 | 1 | 1.6  |
| 2 | 1 | 1.6  |
| 1 | 1 | 4.7  |
| 3 | 2 | 8.8  |
| 4 | 3 | 12   |
| 3 | 2 | 7.9  |
| 1 | 1 | 4.7  |
| 2 | 1 | 4.1  |
| 1 | 1 | 4.7  |
| 2 | 1 | 6.9  |
| 2 | 1 | 6.9  |
| 2 | 1 | 6.9  |
| 2 | 1 | 6.9  |
| 1 | 1 | 6.9  |
| 1 | 1 | 6.9  |
| 1 | 1 | 12.6 |
| 1 | 1 | 6.9  |
| 2 | 1 | 6.9  |
| 2 | 1 | 6.9  |
| 1 | 1 | 5.7  |
| 2 | 1 | 10.9 |
| 1 | 1 | 10.9 |
| 1 | 1 | 10.9 |
| 2 | 1 | 10.9 |
| 1 | 1 | 10.9 |
| 1 | 1 | 10.9 |
| 1 | 1 | 1.5  |
| 2 | 2 | 3.2  |
| 2 | 1 | 2.7  |
| 1 | 1 | 2.1  |
| 2 | 1 | 4.1  |
| 2 | 1 | 4.1  |
| 4 | 3 | 8.8  |
| 4 | 3 | 8.8  |
| 3 | 2 | 6.9  |
| 8 | 5 | 12   |
| 1 | 1 | 16.1 |
| 2 | 1 | 16.1 |

|   |   |      |
|---|---|------|
| 1 | 1 | 2.9  |
| 1 | 1 | 2.9  |
| 1 | 1 | 2.9  |
| 1 | 1 | 2.5  |
| 1 | 1 | 2.5  |
| 1 | 1 | 1.7  |
| 1 | 1 | 2.2  |
| 3 | 2 | 3.6  |
| 2 | 1 | 2.2  |
| 2 | 1 | 2.2  |
| 2 | 1 | 1.6  |
| 1 | 1 | 2.8  |
| 2 | 1 | 3.8  |
| 2 | 1 | 4.9  |
| 1 | 1 | 4.9  |
| 1 | 1 | 3.8  |
| 2 | 2 | 6.8  |
| 3 | 2 | 8.7  |
| 1 | 1 | 3    |
| 2 | 1 | 9.1  |
| 2 | 1 | 9.1  |
| 2 | 1 | 4.9  |
| 2 | 1 | 1.5  |
| 1 | 1 | 9.8  |
| 2 | 1 | 18.5 |
| 4 | 2 | 32.3 |
| 3 | 2 | 32.3 |
| 2 | 1 | 18.5 |
| 2 | 1 | 13.8 |
| 2 | 1 | 18.5 |
| 2 | 1 | 18.5 |
| 2 | 1 | 18.5 |
| 1 | 1 | 13.8 |
| 4 | 2 | 32.3 |
| 4 | 2 | 32.3 |
| 6 | 2 | 32.3 |
| 4 | 2 | 32.3 |
| 4 | 2 | 32.3 |
| 2 | 1 | 18.5 |
| 2 | 1 | 18.5 |
| 1 | 1 | 1.8  |
| 1 | 1 | 1.7  |
| 1 | 1 | 6    |
| 5 | 2 | 14.4 |
| 2 | 1 | 6    |
| 2 | 1 | 8.4  |
| 3 | 1 | 8.4  |

|   |   |      |
|---|---|------|
| 1 | 1 | 6    |
| 2 | 1 | 6    |
| 4 | 2 | 14.4 |
| 3 | 2 | 14.4 |
| 2 | 1 | 7.8  |
| 3 | 2 | 14.1 |
| 2 | 1 | 7.8  |
| 4 | 3 | 17.6 |
| 2 | 1 | 4.6  |
| 2 | 1 | 4.6  |
| 2 | 1 | 4.6  |
| 1 | 1 | 4.6  |
| 1 | 1 | 4.6  |
| 1 | 1 | 1.1  |
| 1 | 1 | 1.1  |
| 3 | 3 | 3.7  |
| 4 | 3 | 3    |
| 1 | 1 | 1.4  |
| 1 | 1 | 1.1  |
| 2 | 2 | 2.1  |
| 2 | 1 | 3.6  |
| 2 | 1 | 3.6  |
| 2 | 1 | 4.1  |
| 4 | 2 | 7.7  |
| 1 | 1 | 3.6  |
| 3 | 2 | 7.7  |
| 2 | 1 | 4.1  |
| 2 | 1 | 13.3 |
| 1 | 1 | 13.3 |
| 2 | 1 | 13.3 |
| 2 | 1 | 9.4  |
| 2 | 1 | 4    |
| 2 | 1 | 4    |
| 1 | 1 | 9.4  |
| 1 | 1 | 7    |
| 2 | 1 | 7    |
| 1 | 1 | 7    |
| 1 | 1 | 7    |
| 2 | 2 | 17.6 |
| 1 | 1 | 0.8  |
| 7 | 5 | 4.4  |
| 2 | 2 | 2.7  |
| 1 | 1 | 0.9  |
| 2 | 2 | 1.8  |
| 2 | 1 | 13.1 |
| 1 | 1 | 13.1 |
| 2 | 1 | 13.1 |

|    |   |      |
|----|---|------|
| 2  | 1 | 13.1 |
| 1  | 1 | 6.6  |
| 1  | 1 | 5.8  |
| 1  | 1 | 5.8  |
| 1  | 1 | 2.7  |
| 1  | 1 | 4.4  |
| 1  | 1 | 4.4  |
| 7  | 1 | 9.8  |
| 14 | 1 | 9.8  |
| 15 | 4 | 14.2 |
| 10 | 1 | 11   |
| 11 | 1 | 14.1 |
| 1  | 1 | 2.9  |
| 5  | 3 | 18.3 |
| 3  | 2 | 10.8 |
| 3  | 1 | 6.3  |
| 2  | 1 | 6.3  |
| 2  | 1 | 6.3  |
| 2  | 1 | 6.3  |
| 3  | 2 | 13.8 |
| 4  | 2 | 13.8 |
| 2  | 1 | 7.5  |
| 1  | 1 | 7.5  |
| 1  | 1 | 6.3  |
| 5  | 3 | 19   |
| 5  | 3 | 16.8 |
| 2  | 1 | 7.6  |
| 1  | 1 | 7.6  |
| 2  | 1 | 7.6  |
| 2  | 2 | 2.7  |
| 3  | 2 | 3.5  |
| 1  | 1 | 1.4  |
| 1  | 1 | 1.4  |
| 3  | 2 | 2.9  |
| 3  | 2 | 2.9  |
| 8  | 5 | 7.6  |
| 2  | 2 | 2.8  |
| 3  | 2 | 10.2 |
| 3  | 2 | 10.2 |
| 3  | 2 | 19.7 |
| 2  | 1 | 5.3  |
| 3  | 3 | 14.8 |
| 2  | 1 | 4.9  |
| 2  | 1 | 14.3 |
| 3  | 2 | 22.5 |
| 2  | 1 | 4.9  |
| 3  | 2 | 10.2 |

|   |   |      |
|---|---|------|
| 5 | 4 | 0.2  |
| 2 | 2 | 0.1  |
| 4 | 3 | 0.1  |
| 4 | 3 | 0.3  |
| 2 | 2 | 0.1  |
| 3 | 2 | 14.7 |
| 2 | 1 | 7.1  |
| 2 | 2 | 19.6 |
| 1 | 1 | 9.8  |
| 2 | 2 | 15.2 |
| 3 | 2 | 12.9 |
| 2 | 1 | 7.6  |
| 1 | 1 | 7.1  |
| 2 | 2 | 19.2 |
| 3 | 2 | 19.2 |
| 4 | 3 | 26.8 |
| 3 | 1 | 3.5  |
| 2 | 1 | 5.1  |
| 2 | 1 | 5.1  |
| 2 | 1 | 5.1  |
| 4 | 2 | 9    |
| 2 | 2 | 9    |
| 4 | 3 | 11.3 |
| 5 | 3 | 10   |
| 1 | 1 | 21.7 |
| 1 | 1 | 21.7 |
| 3 | 2 | 16.2 |
| 2 | 1 | 9.4  |
| 1 | 1 | 9.4  |
| 1 | 1 | 7.7  |
| 4 | 2 | 16.2 |
| 1 | 1 | 9.4  |
| 1 | 1 | 9.4  |
| 2 | 1 | 9.4  |
| 3 | 2 | 3    |
| 1 | 1 | 1.4  |
| 3 | 2 | 3    |
| 1 | 1 | 14   |
| 2 | 1 | 14   |
| 2 | 1 | 14   |
| 2 | 1 | 14   |
| 2 | 1 | 14   |
| 1 | 1 | 14   |
| 3 | 2 | 21.7 |
| 2 | 2 | 21.7 |
| 2 | 1 | 14   |
| 2 | 1 | 14   |

|   |   |      |
|---|---|------|
| 2 | 1 | 14   |
| 2 | 2 | 12.5 |
| 2 | 1 | 13.2 |
| 2 | 1 | 7.9  |
| 4 | 2 | 21.1 |
| 1 | 1 | 13.2 |
| 2 | 1 | 7.9  |
| 1 | 1 | 7.9  |
| 1 | 1 | 6.6  |
| 4 | 2 | 10.5 |
| 2 | 1 | 6.6  |
| 1 | 1 | 6.6  |
| 2 | 1 | 6.6  |
| 2 | 1 | 2.9  |
| 2 | 1 | 2.9  |
| 1 | 1 | 2.9  |
| 2 | 1 | 2.9  |
| 1 | 1 | 2.9  |
| 2 | 1 | 2.9  |
| 1 | 1 | 2.9  |
| 2 | 2 | 6.2  |
| 1 | 1 | 3.2  |
| 2 | 2 | 6.2  |
| 1 | 1 | 3.2  |
| 2 | 1 | 7.6  |
| 4 | 1 | 8.2  |
| 2 | 1 | 8.2  |
| 2 | 1 | 7.6  |
| 3 | 1 | 8.2  |
| 2 | 1 | 8.2  |
| 2 | 2 | 15.8 |
| 1 | 1 | 8.2  |
| 1 | 1 | 0.9  |
| 2 | 1 | 0.9  |
| 1 | 1 | 0.9  |
| 2 | 2 | 6.6  |
| 2 | 1 | 4.7  |
| 2 | 2 | 6.6  |
| 3 | 2 | 7.9  |
| 1 | 1 | 4.7  |
| 2 | 1 | 4.7  |
| 2 | 2 | 0.9  |
| 1 | 1 | 2.7  |
| 2 | 1 | 2.7  |
| 2 | 1 | 1.7  |
| 3 | 1 | 1.7  |
| 1 | 1 | 1.7  |

|   |   |      |
|---|---|------|
| 2 | 1 | 1.7  |
| 2 | 1 | 1.7  |
| 2 | 1 | 1.7  |
| 3 | 2 | 2.9  |
| 2 | 1 | 1.7  |
| 2 | 1 | 1.7  |
| 2 | 1 | 1.7  |
| 2 | 1 | 1.7  |
| 2 | 1 | 1.7  |
| 2 | 1 | 9    |
| 2 | 2 | 14.1 |
| 3 | 3 | 17   |
| 3 | 1 | 14.1 |
| 1 | 1 | 9    |
| 2 | 1 | 14.3 |
| 3 | 1 | 14.3 |
| 1 | 1 | 14.3 |
| 2 | 1 | 14.3 |
| 2 | 1 | 1    |
| 2 | 1 | 8.7  |
| 2 | 1 | 4.2  |
| 1 | 1 | 8.7  |
| 2 | 1 | 3.8  |
| 2 | 1 | 7.3  |
| 2 | 1 | 8.7  |
| 2 | 1 | 8.7  |
| 3 | 2 | 19.2 |
| 4 | 2 | 19.2 |
| 4 | 3 | 23.3 |
| 3 | 2 | 19.2 |
| 1 | 1 | 6.1  |
| 2 | 1 | 8.2  |
| 1 | 1 | 6.2  |
| 2 | 1 | 6.2  |
| 2 | 2 | 9.7  |
| 1 | 1 | 4.3  |
| 1 | 1 | 4.3  |
| 1 | 1 | 4.3  |
| 2 | 1 | 13.2 |
| 1 | 1 | 13.2 |
| 2 | 1 | 13.2 |
| 1 | 1 | 13.2 |
| 2 | 1 | 13.2 |
| 1 | 1 | 8    |
| 1 | 1 | 6.2  |
| 2 | 1 | 5.9  |
| 1 | 1 | 6.8  |



|   |   |      |
|---|---|------|
| 1 | 1 | 6.8  |
| 2 | 2 | 14.9 |
| 1 | 1 | 6.8  |
| 2 | 1 | 6.8  |
| 2 | 1 | 10.8 |
| 3 | 2 | 18.5 |
| 2 | 2 | 30   |
| 2 | 1 | 10.8 |
| 1 | 1 | 10.8 |
| 1 | 1 | 7.7  |
| 2 | 1 | 7.7  |
| 2 | 2 | 18.5 |
| 2 | 1 | 7.7  |
| 1 | 1 | 1.2  |
| 1 | 1 | 1.2  |
| 1 | 1 | 1    |
| 1 | 1 | 1    |
| 1 | 1 | 3.5  |
| 1 | 1 | 3.5  |
| 2 | 1 | 4.6  |
| 4 | 3 | 12.8 |
| 1 | 1 | 3.9  |
| 1 | 1 | 3.9  |
| 1 | 1 | 3.9  |
| 1 | 1 | 3.2  |
| 2 | 1 | 3.2  |
| 2 | 1 | 3.2  |
| 3 | 2 | 5.7  |
| 1 | 1 | 3.2  |
| 1 | 1 | 3.2  |
| 1 | 1 | 3.2  |
| 2 | 1 | 3.2  |
| 2 | 1 | 3.2  |
| 4 | 1 | 3.2  |
| 2 | 1 | 3.2  |
| 2 | 1 | 3.2  |
| 2 | 1 | 3.2  |
| 2 | 1 | 3.2  |
| 2 | 1 | 3.2  |
| 2 | 1 | 3.4  |
| 1 | 1 | 6    |
| 3 | 2 | 15.9 |
| 1 | 1 | 2.1  |
| 1 | 1 | 3.5  |
| 1 | 1 | 4.6  |
| 2 | 2 | 9.2  |
| 2 | 1 | 4.6  |
| 3 | 2 | 8.2  |

|    |   |      |
|----|---|------|
| 2  | 2 | 8.2  |
| 2  | 2 | 9.2  |
| 16 | 1 | 12.5 |
| 18 | 1 | 12.6 |
| 5  | 3 | 3.8  |
| 5  | 3 | 3.7  |
| 3  | 1 | 1.2  |
| 1  | 1 | 1.2  |
| 2  | 1 | 1.2  |
| 1  | 1 | 1.5  |
| 2  | 1 | 1.2  |
| 2  | 2 | 3.8  |
| 1  | 1 | 2.2  |
| 1  | 1 | 2.2  |
| 1  | 1 | 2.2  |
| 2  | 1 | 2.2  |
| 1  | 1 | 2.2  |
| 4  | 2 | 2.4  |
| 4  | 3 | 4.1  |
| 3  | 2 | 11.4 |
| 3  | 2 | 11.4 |
| 1  | 1 | 7.6  |
| 2  | 1 | 7.6  |
| 1  | 1 | 7.6  |
| 2  | 2 | 11.8 |
| 3  | 2 | 6    |
| 2  | 2 | 9.4  |
| 2  | 2 | 1.3  |
| 2  | 1 | 1.5  |
| 2  | 1 | 1.5  |
| 1  | 1 | 1.5  |
| 2  | 1 | 1.5  |
| 1  | 1 | 1.5  |
| 2  | 1 | 1.5  |
| 1  | 1 | 1.5  |
| 1  | 1 | 1.5  |
| 1  | 1 | 7.7  |
| 2  | 1 | 7.7  |
| 1  | 1 | 7.7  |
| 2  | 1 | 7.7  |
| 2  | 1 | 2.4  |
| 1  | 1 | 2.2  |
| 1  | 1 | 3.6  |
| 4  | 2 | 13.8 |
| 5  | 2 | 11.1 |
| 9  | 4 | 21.6 |

|    |   |      |
|----|---|------|
| 4  | 3 | 13.5 |
| 2  | 1 | 0.7  |
| 2  | 1 | 4.3  |
| 1  | 1 | 4.3  |
| 2  | 1 | 4.1  |
| 2  | 1 | 9.6  |
| 5  | 3 | 18.3 |
| 2  | 1 | 9.6  |
| 2  | 1 | 9.6  |
| 2  | 1 | 5.3  |
| 2  | 1 | 5.3  |
| 1  | 1 | 5.3  |
| 3  | 1 | 5.3  |
| 2  | 1 | 5.3  |
| 1  | 1 | 1.8  |
| 2  | 2 | 4.2  |
| 2  | 1 | 10.5 |
| 1  | 1 | 3.7  |
| 3  | 1 | 3.7  |
| 1  | 1 | 1.2  |
| 2  | 1 | 1.6  |
| 1  | 1 | 2.5  |
| 1  | 1 | 5    |
| 1  | 1 | 5    |
| 2  | 1 | 0.7  |
| 1  | 1 | 2.8  |
| 1  | 1 | 0.8  |
| 1  | 1 | 6.2  |
| 1  | 1 | 3.9  |
| 1  | 1 | 7.9  |
| 2  | 1 | 7.9  |
| 2  | 1 | 7.9  |
| 2  | 1 | 7.9  |
| 1  | 1 | 1.5  |
| 1  | 1 | 2.9  |
| 3  | 2 | 8.9  |
| 9  | 5 | 19.4 |
| 3  | 2 | 6.7  |
| 1  | 1 | 4.8  |
| 24 | 5 | 19.3 |
| 4  | 3 | 14.6 |
| 4  | 3 | 11.6 |
| 1  | 1 | 5.2  |
| 4  | 2 | 18.1 |
| 5  | 3 | 22.3 |
| 2  | 1 | 7.4  |
| 3  | 1 | 5    |

|   |   |      |
|---|---|------|
| 8 | 5 | 17.2 |
| 3 | 2 | 9.7  |
| 3 | 2 | 12.1 |
| 2 | 1 | 5.4  |
| 1 | 1 | 7.4  |
| 3 | 2 | 17.4 |
| 2 | 1 | 8.9  |
| 1 | 1 | 5    |
| 3 | 2 | 15.7 |
| 2 | 1 | 6.2  |
| 3 | 2 | 9    |
| 2 | 2 | 25   |
| 1 | 1 | 6.1  |
| 2 | 1 | 6.1  |
| 2 | 1 | 6.1  |
| 1 | 1 | 5.5  |
| 1 | 1 | 5.5  |
| 1 | 1 | 5.5  |
| 1 | 1 | 1.6  |
| 1 | 1 | 1.6  |
| 1 | 1 | 3.8  |
| 2 | 1 | 3.8  |
| 2 | 1 | 3.8  |
| 1 | 1 | 2.6  |
| 2 | 1 | 7.3  |
| 1 | 1 | 7.3  |
| 1 | 1 | 7.3  |
| 1 | 1 | 7.3  |
| 2 | 1 | 7.3  |
| 2 | 1 | 7.3  |
| 2 | 1 | 7.3  |
| 2 | 1 | 7.3  |
| 2 | 1 | 7.9  |
| 5 | 4 | 21.1 |
| 1 | 1 | 7.9  |
| 2 | 1 | 7.2  |
| 2 | 1 | 7.9  |
| 1 | 1 | 7.9  |
| 1 | 1 | 10.1 |
| 6 | 3 | 3.6  |
| 2 | 2 | 2.1  |
| 4 | 4 | 6.4  |
| 2 | 2 | 2.4  |
| 2 | 1 | 2.2  |
| 4 | 2 | 6.4  |
| 1 | 1 | 2.9  |
| 4 | 3 | 3.2  |
| 2 | 1 | 1.1  |

|   |   |      |
|---|---|------|
| 1 | 1 | 1.1  |
| 1 | 1 | 1.1  |
| 4 | 3 | 5    |
| 2 | 2 | 4.7  |
| 1 | 1 | 2.4  |
| 3 | 2 | 14.2 |
| 2 | 2 | 4.6  |
| 3 | 3 | 2    |
| 1 | 1 | 1    |
| 1 | 1 | 0.5  |
| 3 | 2 | 5.7  |
| 3 | 2 | 10.8 |
| 3 | 1 | 5.4  |
| 3 | 2 | 13.2 |
| 1 | 1 | 2.3  |
| 1 | 1 | 2.6  |
| 1 | 1 | 2.6  |
| 3 | 2 | 5.8  |
| 2 | 1 | 3.6  |
| 1 | 1 | 3.8  |
| 3 | 2 | 7.3  |
| 3 | 2 | 7.1  |
| 2 | 2 | 7.9  |
| 3 | 2 | 4.1  |
| 1 | 1 | 0.5  |
| 1 | 1 | 0.5  |
| 2 | 1 | 0.5  |
| 1 | 1 | 0.5  |
| 2 | 2 | 4.3  |
| 1 | 1 | 1.4  |
| 2 | 1 | 2.3  |
| 1 | 1 | 2    |
| 1 | 1 | 2    |
| 1 | 1 | 2    |
| 1 | 1 | 0.8  |
| 1 | 1 | 2    |
| 3 | 2 | 4.4  |
| 3 | 2 | 4.4  |
| 2 | 1 | 1.5  |
| 2 | 1 | 11.5 |
| 2 | 1 | 11.5 |
| 1 | 1 | 5.3  |
| 2 | 1 | 15   |
| 1 | 1 | 11.5 |
| 2 | 1 | 3.9  |
| 2 | 2 | 2.1  |
| 1 | 1 | 1.6  |

|   |   |      |
|---|---|------|
| 1 | 1 | 1.5  |
| 2 | 1 | 9.4  |
| 1 | 1 | 9.4  |
| 2 | 1 | 2.8  |
| 1 | 1 | 2.8  |
| 2 | 1 | 2.6  |
| 2 | 1 | 3.4  |
| 2 | 2 | 5.5  |
| 1 | 1 | 2.8  |
| 1 | 1 | 2.7  |
| 2 | 1 | 1.5  |
| 1 | 1 | 2.5  |
| 2 | 1 | 6.4  |
| 1 | 1 | 1.8  |
| 1 | 1 | 2.4  |
| 1 | 1 | 1.8  |
| 1 | 1 | 1.8  |
| 2 | 1 | 1.3  |
| 1 | 1 | 3.4  |
| 1 | 1 | 1.6  |
| 1 | 1 | 3.8  |
| 1 | 1 | 4.3  |
| 1 | 1 | 4.3  |
| 1 | 1 | 1.2  |
| 1 | 1 | 2.1  |
| 1 | 1 | 1.6  |
| 2 | 1 | 2    |
| 1 | 1 | 0.4  |
| 1 | 1 | 0.7  |
| 1 | 1 | 1.7  |
| 2 | 1 | 1.1  |
| 1 | 1 | 2.7  |
| 2 | 1 | 0.9  |
| 1 | 1 | 0.9  |
| 2 | 1 | 7.1  |
| 1 | 1 | 6    |
| 2 | 1 | 3.3  |
| 1 | 1 | 2.1  |
| 1 | 1 | 2.6  |
| 1 | 1 | 3.5  |
| 2 | 1 | 4.2  |
| 2 | 1 | 17.9 |
| 2 | 1 | 17.9 |
| 1 | 1 | 17.9 |
| 2 | 1 | 0.6  |
| 4 | 3 | 1.1  |
| 1 | 1 | 0.6  |

|     |    |      |
|-----|----|------|
| 2   | 1  | 0.6  |
| 2   | 1  | 0.6  |
| 30  | 12 | 16   |
| 41  | 18 | 18.6 |
| 144 | 10 | 27.4 |
| 185 | 14 | 31.1 |
| 11  | 6  | 21.5 |
| 8   | 4  | 13.5 |
| 2   | 2  | 14.1 |
| 1   | 1  | 8.5  |
| 1   | 1  | 0.8  |
| 2   | 1  | 0.8  |
| 2   | 1  | 2.2  |
| 4   | 1  | 2.2  |
| 4   | 1  | 2.2  |
| 4   | 1  | 2.2  |
| 10  | 1  | 2.2  |
| 8   | 1  | 2.2  |
| 7   | 1  | 2.2  |
| 2   | 1  | 2.2  |
| 1   | 1  | 1.2  |
| 2   | 1  | 7.6  |
| 1   | 1  | 7.6  |
| 2   | 1  | 7.6  |
| 3   | 2  | 5    |
| 1   | 1  | 1    |
| 2   | 1  | 0.9  |
| 2   | 1  | 13.4 |
| 1   | 1  | 1.2  |
| 1   | 1  | 7.3  |
| 1   | 1  | 5.2  |
| 1   | 1  | 4.8  |
| 1   | 1  | 1    |
| 1   | 1  | 0.8  |
| 2   | 1  | 3    |
| 72  | 10 | 44.8 |
| 121 | 12 | 52.5 |
| 98  | 11 | 47.5 |
| 97  | 11 | 53   |
| 2   | 1  | 9.8  |
| 1   | 1  | 9.8  |
| 2   | 1  | 12.5 |
| 1   | 1  | 10.3 |
| 2   | 1  | 12.5 |
| 1   | 1  | 12.5 |
| 2   | 1  | 4.8  |
| 1   | 1  | 4.8  |

|   |   |      |
|---|---|------|
| 1 | 1 | 2.2  |
| 2 | 1 | 2.2  |
| 2 | 1 | 1.6  |
| 1 | 1 | 3.7  |
| 1 | 1 | 9.8  |
| 1 | 1 | 0.7  |
| 1 | 1 | 5.7  |
| 1 | 1 | 5.7  |
| 1 | 1 | 6    |
| 1 | 1 | 0.7  |
| 1 | 1 | 2.1  |
| 2 | 1 | 1.5  |
| 4 | 1 | 1.5  |
| 4 | 1 | 1.5  |
| 1 | 1 | 3.8  |
| 1 | 1 | 2    |
| 1 | 1 | 4.7  |
| 1 | 1 | 1.4  |
| 1 | 1 | 1.7  |
| 1 | 1 | 2.5  |
| 1 | 1 | 2.6  |
| 2 | 1 | 2.6  |
| 1 | 1 | 1.8  |
| 1 | 1 | 1.2  |
| 1 | 1 | 0.7  |
| 1 | 1 | 1.6  |
| 1 | 1 | 0.3  |
| 1 | 1 | 0.4  |
| 2 | 2 | 2.7  |
| 2 | 2 | 9.8  |
| 1 | 1 | 6    |
| 1 | 1 | 6    |
| 1 | 1 | 8.9  |
| 1 | 1 | 8.9  |
| 1 | 1 | 15.7 |
| 1 | 1 | 11.5 |
| 1 | 1 | 11.5 |
| 2 | 1 | 11.5 |
| 2 | 1 | 11.5 |
| 1 | 1 | 2.2  |
| 2 | 1 | 1.9  |
| 1 | 1 | 1.7  |
| 2 | 1 | 3.3  |
| 2 | 1 | 0.6  |
| 2 | 1 | 0.6  |
| 5 | 1 | 0.6  |
| 8 | 1 | 0.6  |



|   |   |     |
|---|---|-----|
| 2 | 1 | 0.6 |
| 2 | 1 | 0.6 |
| 1 | 1 | 5.6 |
| 3 | 1 | 1.8 |
| 1 | 1 | 6.5 |
| 1 | 1 | 9.1 |
| 2 | 1 | 1.2 |
| 3 | 1 | 1.2 |
| 1 | 1 | 1.9 |
| 1 | 1 | 5.8 |
| 1 | 1 | 1.7 |
| 1 | 1 | 3.4 |
| 1 | 1 | 1.1 |
| 1 | 1 | 3.1 |
| 1 | 1 | 6.8 |
| 1 | 1 | 1.7 |
| 1 | 1 | 1.7 |
| 1 | 1 | 3.7 |
| 1 | 1 | 3.7 |
| 1 | 1 | 2.4 |
| 1 | 1 | 2.4 |
| 1 | 1 | 2.4 |
| 1 | 1 | 0.5 |
| 1 | 1 | 1.8 |
| 1 | 1 | 20  |
| 1 | 1 | 20  |
| 1 | 1 | 3.4 |
| 1 | 1 | 3.4 |
| 1 | 1 | 7.5 |
| 1 | 1 | 2.7 |
| 1 | 1 | 1.6 |
| 1 | 1 | 0.6 |
| 1 | 1 | 0.7 |
| 1 | 1 | 1.8 |
| 1 | 1 | 1.2 |
| 1 | 1 | 0.1 |
| 1 | 1 | 0.1 |
| 1 | 1 | 1.7 |
| 3 | 3 | 3.3 |
| 1 | 1 | 1.2 |
| 2 | 1 | 1.5 |
| 2 | 2 | 2.4 |
| 1 | 1 | 4.4 |
| 1 | 1 | 4.4 |
| 2 | 2 | 6.7 |
| 1 | 1 | 4.4 |
| 1 | 1 | 4.4 |

|    |    |      |
|----|----|------|
| 1  | 1  | 4.4  |
| 1  | 1  | 3.4  |
| 2  | 1  | 1.1  |
| 1  | 1  | 2.7  |
| 2  | 1  | 1    |
| 1  | 1  | 1.3  |
| 2  | 1  | 2.6  |
| 1  | 1  | 4.1  |
| 1  | 1  | 8.1  |
| 1  | 1  | 0.6  |
| 1  | 1  | 1.5  |
| 1  | 1  | 12.4 |
| 1  | 1  | 7.2  |
| 1  | 1  | 2.4  |
| 86 | 18 | 56.5 |
| 72 | 9  | 38.7 |
| 94 | 20 | 69.4 |
| 70 | 17 | 54.9 |
| 24 | 13 | 30   |
| 26 | 13 | 25.4 |
| 57 | 22 | 42.8 |
| 54 | 21 | 37.7 |
| 10 | 4  | 7.2  |
| 9  | 4  | 7.1  |
| 17 | 7  | 11.5 |
| 18 | 9  | 12.7 |
| 5  | 3  | 11.7 |
| 3  | 2  | 6.9  |
| 2  | 1  | 3.9  |
| 4  | 2  | 9    |
| 2  | 1  | 6.2  |
| 2  | 1  | 6.2  |
| 1  | 1  | 1.3  |
| 2  | 1  | 1.3  |
| 2  | 1  | 1.3  |
| 1  | 1  | 0.6  |
| 1  | 1  | 2.8  |
| 2  | 1  | 2.8  |
| 4  | 1  | 0.7  |
| 1  | 1  | 4.3  |
| 5  | 1  | 4.5  |
| 4  | 1  | 4.3  |
| 2  | 1  | 1.3  |
| 1  | 1  | 2.9  |
| 2  | 1  | 2.2  |
| 1  | 1  | 0.6  |
| 1  | 1  | 0.8  |

|   |   |      |
|---|---|------|
| 2 | 1 | 1.2  |
| 2 | 1 | 0.3  |
| 1 | 1 | 0.9  |
| 2 | 1 | 4.1  |
| 1 | 1 | 0.7  |
| 3 | 1 | 5.9  |
| 1 | 1 | 0.9  |
| 2 | 1 | 0.5  |
| 2 | 1 | 0.8  |
| 4 | 1 | 1.7  |
| 2 | 1 | 4.1  |
| 1 | 1 | 2.1  |
| 2 | 1 | 2.1  |
| 1 | 1 | 1    |
| 1 | 1 | 0.9  |
| 1 | 1 | 5    |
| 1 | 1 | 3.2  |
| 1 | 1 | 0.8  |
| 1 | 1 | 0.8  |
| 2 | 1 | 1.5  |
| 1 | 1 | 2.2  |
| 1 | 1 | 2.2  |
| 1 | 1 | 5.2  |
| 1 | 1 | 3.5  |
| 1 | 1 | 0.9  |
| 1 | 1 | 0.8  |
| 1 | 1 | 1.4  |
| 1 | 1 | 3.1  |
| 1 | 1 | 6.1  |
| 1 | 1 | 4.9  |
| 1 | 1 | 0.7  |
| 1 | 1 | 22   |
| 2 | 1 | 1.9  |
| 1 | 1 | 3    |
| 1 | 1 | 8.6  |
| 1 | 1 | 8.6  |
| 2 | 1 | 2.9  |
| 1 | 1 | 5.7  |
| 1 | 1 | 5.7  |
| 2 | 1 | 5.7  |
| 3 | 1 | 7.2  |
| 2 | 2 | 9.7  |
| 3 | 1 | 5.6  |
| 2 | 2 | 0.9  |
| 3 | 2 | 3.6  |
| 2 | 1 | 12.7 |
| 2 | 1 | 12.7 |

|     |    |      |
|-----|----|------|
| 1   | 1  | 12.7 |
| 2   | 1  | 12.7 |
| 2   | 1  | 12.7 |
| 1   | 1  | 12.7 |
| 2   | 1  | 1.5  |
| 2   | 1  | 1.5  |
| 1   | 1  | 6.8  |
| 1   | 1  | 6.8  |
| 1   | 1  | 2.3  |
| 1   | 1  | 2.3  |
| 1   | 1  | 2.5  |
| 1   | 1  | 2.5  |
| 1   | 1  | 2.5  |
| 1   | 1  | 0.8  |
| 3   | 2  | 1.8  |
| 1   | 1  | 0.8  |
| 2   | 1  | 0.8  |
| 1   | 1  | 5.3  |
| 1   | 1  | 5.3  |
| 2   | 1  | 5.3  |
| 1   | 1  | 5.3  |
| 1   | 1  | 1.2  |
| 2   | 1  | 1.2  |
| 2   | 1  | 1.2  |
| 1   | 1  | 8.3  |
| 1   | 1  | 8.3  |
| 1   | 1  | 2.1  |
| 1   | 1  | 0.9  |
| 1   | 1  | 9    |
| 1   | 1  | 9    |
| 1   | 1  | 2.9  |
| 2   | 1  | 0.6  |
| 1   | 1  | 5.7  |
| 2   | 1  | 4.1  |
| 1   | 1  | 2.8  |
| 1   | 1  | 2.1  |
| 134 | 15 | 54.8 |
| 133 | 16 | 53.1 |
| 115 | 15 | 50   |
| 123 | 16 | 53.1 |
| 1   | 1  | 2.3  |
| 1   | 1  | 3.6  |
| 2   | 1  | 2.8  |
| 1   | 1  | 4.2  |
| 1   | 1  | 4.2  |
| 1   | 1  | 6    |
| 2   | 1  | 6    |

|   |   |      |
|---|---|------|
| 1 | 1 | 5.1  |
| 1 | 1 | 5.3  |
| 2 | 1 | 5.3  |
| 1 | 1 | 5.3  |
| 1 | 1 | 1.6  |
| 1 | 1 | 8.6  |
| 2 | 1 | 7.4  |
| 1 | 1 | 3.4  |
| 2 | 1 | 2.1  |
| 1 | 1 | 3    |
| 1 | 1 | 2.1  |
| 2 | 1 | 1    |
| 2 | 1 | 11.5 |
| 1 | 1 | 4.1  |
| 1 | 1 | 3.8  |
| 1 | 1 | 13.2 |
| 2 | 1 | 3.8  |
| 1 | 1 | 6.5  |
| 1 | 1 | 1.7  |
| 1 | 1 | 3.3  |
| 2 | 1 | 8.8  |
| 2 | 1 | 0.7  |
| 2 | 1 | 1.9  |
| 1 | 1 | 12.3 |
| 3 | 1 | 0.7  |
| 1 | 1 | 0.8  |
| 2 | 1 | 4.9  |
| 7 | 1 | 5.5  |
| 4 | 1 | 9.4  |
| 5 | 2 | 10.5 |
| 1 | 1 | 1.7  |
| 3 | 2 | 1.1  |
| 2 | 2 | 2    |
| 1 | 1 | 10   |
| 1 | 1 | 4.3  |
| 1 | 1 | 0.8  |
| 2 | 1 | 3.8  |
| 1 | 1 | 14.6 |
| 2 | 1 | 3.1  |
| 1 | 1 | 6.2  |
| 1 | 1 | 5.9  |
| 1 | 1 | 2.7  |
| 1 | 1 | 8.2  |
| 1 | 1 | 1.6  |
| 1 | 1 | 3.2  |
| 2 | 1 | 2.1  |
| 1 | 1 | 6.8  |

|   |   |      |
|---|---|------|
| 1 | 1 | 4.3  |
| 2 | 1 | 7.4  |
| 1 | 1 | 5.2  |
| 2 | 1 | 8.3  |
| 1 | 1 | 9.4  |
| 2 | 1 | 4.1  |
| 1 | 1 | 10.6 |
| 1 | 1 | 2.4  |
| 1 | 1 | 7.4  |
| 1 | 1 | 2.6  |
| 1 | 1 | 1.1  |
| 2 | 1 | 2.7  |
| 1 | 1 | 2.3  |
| 1 | 1 | 8.7  |
| 1 | 1 | 2.5  |
